# Supplementary material for: Blood Plasma Small Non-Coding RNAs as Diagnostic Molecules of Progesterone Receptor-Negative Phenotype of Serous Ovarian Tumors
Source: Preprints.org preprint supplement (doi:10.20944/preprints202307.1155.v1), 2023-07-18
Supplement: Supplementary file 1 [file TableS1.xlsx]

## Sheet: Sheet1
ovary: HGSOC VS benign
	Gene	baseMean	log2FoldChange	lfcSE	stat	pvalue	padj	s6	s8	s30	s18	s21	s34
1	hsa-miR-183-5p	567.593	6.09293	0.623018	9.77971	1.37608e-22	4.74746e-20	14.8769	18.223	16.0026	740.213	886.847	1729.4
3	hsa-miR-31-5p	136.55	6.48464	0.76027	8.52939	1.47122e-17	2.51991e-15	1.94046	4.7027	2.28609	144.092	367.61	298.67
2	hsa-miR-182-5p	299.936	5.66413	0.66769	8.48318	2.19122e-17	2.51991e-15	7.11502	11.7568	16.0026	357.905	484.33	922.506
4	hsa-miR-200c-3p	36016.6	5.76337	0.750612	7.67822	1.61317e-14	1.39136e-12	1553.66	2023.34	329.197	116182	40742.6	55268.5
5	hsa-miR-449c-5p	1850.97	6.61361	0.868718	7.61307	2.67665e-14	1.84689e-12	53.0392	47.6149	11.4304	5721.83	457.059	4814.86
6	hsa-miR-483-3p	1525.07	7.56417	1.07434	7.04077	1.91177e-12	1.09927e-10	6.4682	37.6216	3.81015	5812.47	93.8116	3196.26
7	hsa-miR-200a-5p	687.558	5.23246	0.747442	7.00048	2.55084e-12	1.2572e-10	47.2178	51.7298	7.62029	984.239	987.203	2047.34
8	hsa-miR-205-5p	131.37	6.86875	1.01464	6.76968	1.29069e-11	5.56609e-10	3.88092	0.587838	2.28609	620.524	119.992	40.9467
9	hsa-miR-141-3p	182.556	4.98779	0.746554	6.68108	2.37185e-11	9.09209e-10	11.6428	14.1081	7.62029	673.977	125.446	262.541
10	hsa-miR-378c	457.264	4.19815	0.640814	6.55128	5.7046e-11	1.96809e-09	32.9878	47.027	61.7244	865.712	433.06	1303.07
12	hsa-miR-378a-3p	11365.4	3.56808	0.575575	6.19916	5.67653e-10	1.7103e-08	1262.59	1953.39	2086.44	20881.7	14535.3	27472.9
11	hsa-miR-200b-3p	8270.49	4.61981	0.746119	6.19178	5.94887e-10	1.7103e-08	741.255	1031.66	166.122	10989.3	10647.6	26047
13	hsa-miR-224-5p	542.161	4.24663	0.701206	6.05618	1.39388e-09	3.69915e-08	63.3883	55.2568	44.1977	665.843	2002.77	421.511
15	hsa-miR-625-3p	238.293	3.69187	0.62094	5.9456	2.75438e-09	6.34911e-08	33.6346	34.6824	34.2913	574.043	215.985	537.125
16	hsa-miR-625-5p	229.445	3.72202	0.626889	5.93728	2.89786e-09	6.34911e-08	32.9878	31.1554	32.7673	560.098	201.804	517.856
14	hsa-miR-200a-3p	1788.94	4.66528	0.786107	5.93466	2.94451e-09	6.34911e-08	170.76	193.987	41.9116	2891.13	1084.29	6351.56
17	hsa-miR-7-5p	578.354	3.69474	0.624881	5.9127	3.36538e-09	6.82975e-08	91.8484	91.1149	65.5345	1026.07	543.234	1652.32
18	hsa-miR-429	86.019	4.45103	0.761737	5.84326	5.11897e-09	9.81137e-08	7.76184	12.9324	1.52406	141.768	111.265	240.863
19	hsa-miR-378d	151.958	3.77604	0.650927	5.80102	6.59116e-09	1.19682e-07	10.3491	26.4527	25.147	295.156	178.896	375.747
20	hsa-miR-200b-5p	271.056	4.73442	0.820806	5.76802	8.02098e-09	1.38362e-07	23.9323	32.3311	2.28609	340.475	357.793	869.516
21	hsa-miR-378a-5p	143.765	3.7938	0.666778	5.68975	1.27227e-08	2.09016e-07	9.05548	22.3378	26.671	343.961	157.08	303.488
22	hsa-miR-449a	96.8925	5.90805	1.04016	5.67995	1.34737e-08	2.11292e-07	2.58728	5.29054	1.52406	314.91	6.54499	250.498
23	hsa-miR-675-5p	65.9879	6.87514	1.243	5.53108	3.18265e-08	4.77397e-07	1.29364	0.587838	1.52406	246.35	146.172	0
24	hsa-miR-378g	43.5116	3.60609	0.679228	5.30911	1.10163e-07	1.5836e-06	3.88092	8.22973	7.62029	80.1801	59.9958	101.163
25	hsa-miR-17-5p	287.663	3.19286	0.610657	5.22856	1.70833e-07	2.35749e-06	70.5034	55.2568	44.1977	647.251	282.526	626.244
26	hsa-miR-210-3p	351.507	3.45767	0.675416	5.11932	3.06646e-07	4.06895e-06	66.6224	41.7365	67.8206	1187.59	383.973	361.295
27	hsa-miR-185-3p	78.0404	3.29905	0.670522	4.92012	8.6489e-07	1.10514e-05	7.11502	14.1081	22.0989	92.9624	177.806	154.152
28	hsa-miR-129-5p	178.39	-3.19576	0.654267	-4.88449	1.03695e-06	1.27768e-05	332.465	164.007	468.648	45.3192	26.18	33.7209
29	hsa-miR-3687	154.393	3.17758	0.657102	4.83575	1.32645e-06	1.57801e-05	24.5792	38.7973	28.9571	457.84	238.892	137.292
30	hsa-miR-135a-3p	73.6386	-4.41775	0.925347	-4.77415	1.80465e-06	2.07534e-05	197.28	170.473	55.6281	16.2684	2.18166	0
31	hsa-miR-135b-5p	73.666	3.70016	0.777647	4.75815	1.95377e-06	2.17435e-05	4.52774	11.1689	16.0026	44.1571	231.256	134.883
32	hsa-miR-425-5p	219.053	2.72899	0.575808	4.73941	2.14342e-06	2.31088e-05	56.9201	47.027	68.5827	504.321	343.612	293.853
33	hsa-miR-187-3p	141.621	4.16624	0.882513	4.72088	2.34824e-06	2.45498e-05	32.341	4.7027	7.62029	133.633	98.1749	573.254
34	hsa-miR-375	431.329	4.89116	1.05078	4.65481	3.24283e-06	3.29052e-05	41.3965	38.2095	4.57218	893.601	22.9075	1587.29
35	hsa-miR-1307-3p	4354.68	2.93855	0.634197	4.63349	3.59546e-06	3.5441e-05	1724.42	770.656	519.704	6851.33	8959.01	7302.97
36	hsa-miR-18a-3p	50.1221	3.09943	0.682141	4.54368	5.52807e-06	5.29773e-05	16.1705	5.29054	9.90638	91.8004	64.3591	113.206
37	hsa-miR-20a-5p	274.306	2.72344	0.616954	4.41433	1.01325e-05	9.23669e-05	76.3247	72.8919	67.0586	637.954	227.984	563.62
38	hsa-miR-3615	425.005	2.69089	0.609702	4.41345	1.01737e-05	9.23669e-05	141.007	132.851	67.8206	462.488	883.574	862.29
39	hsa-miR-145-3p	357.682	-3.00735	0.690633	-4.35448	1.33382e-05	0.000117991	324.704	446.757	1138.47	112.717	75.2674	48.1726
40	hsa-miR-15b-5p	411.623	2.92768	0.678976	4.31191	1.61852e-05	0.000139598	69.2097	94.0541	123.449	262.619	757.038	1163.37
41	hsa-miR-101-3p	993.943	-2.52744	0.589052	-4.29068	1.78125e-05	0.000149886	996.102	2179.7	1905.84	325.368	229.075	327.574
42	hsa-miR-483-5p	546.842	4.58534	1.09221	4.19823	2.69005e-05	0.000220969	6.4682	12.9324	112.018	1487.4	43.6333	1618.6
43	hsa-miR-93-5p	857.901	2.64158	0.634377	4.16405	3.12649e-05	0.000250846	389.385	201.628	119.639	1368.87	1210.82	1857.06
44	hsa-miR-130b-5p	227.39	3.02445	0.727247	4.15877	3.19972e-05	0.000250888	86.6738	49.3784	12.9545	290.507	382.882	541.942
45	hsa-miR-21-3p	65.3415	3.25554	0.793063	4.10502	4.04274e-05	0.000309943	10.9959	14.1081	12.1925	39.509	257.436	57.8072
46	hsa-miR-143-3p	21703.7	-2.55962	0.626152	-4.08786	4.35366e-05	0.000326525	26367	25818.4	59153.3	8795.4	5813.05	4275.32
47	hsa-miR-10a-3p	43.8779	3.43514	0.853423	4.02514	5.69416e-05	0.000417975	2.58728	9.99325	9.90638	97.6105	128.718	14.4518
48	hsa-miR-542-3p	19.6629	-3.61195	0.933808	-3.86798	0.000109738	0.000788745	24.5792	25.277	60.2003	4.64812	3.2725	0
49	hsa-miR-532-5p	4243.48	-2.14763	0.5562	-3.86125	0.000112809	0.000794265	8708.78	5055.41	7008.38	1784.88	1275.18	1628.24
50	hsa-miR-185-5p	204.206	2.45328	0.638204	3.84403	0.000121029	0.000835098	41.3965	48.7906	99.0638	208.003	399.245	428.737
52	hsa-miR-204-5p	207.737	-2.68727	0.713841	-3.76452	0.000166871	0.00110829	128.717	557.271	393.969	44.1571	86.1758	36.1295
51	hsa-miR-136-3p	19.7575	-3.08122	0.818548	-3.76425	0.000167046	0.00110829	27.1664	32.9189	45.7218	4.64812	3.2725	4.81726
53	hsa-miR-424-5p	37.3986	-3.63752	0.968101	-3.75738	0.000171701	0.00111768	9.7023	54.6689	144.024	8.13421	5.45416	2.40863
54	hsa-miR-10a-5p	4239.83	3.00851	0.807355	3.72638	0.000194251	0.00124105	756.779	1424.92	630.198	10278.2	11322.8	1026.08
55	hsa-miR-708-3p	197.619	-2.16484	0.581893	-3.72034	0.000198954	0.00124798	267.783	362.696	337.579	53.4534	65.4499	98.7539
56	hsa-miR-335-3p	96.5163	2.11588	0.569741	3.71377	0.000204198	0.00125801	36.8687	35.2703	36.5774	191.735	146.172	132.475
57	hsa-miR-204-3p	59.5595	-3.5051	0.96164	-3.64492	0.000267476	0.00161893	12.2896	72.3041	244.611	6.97218	16.3625	4.81726
59	hsa-miR-195-5p	196	-3.06785	0.854262	-3.59122	0.000329129	0.00193158	39.456	301.561	710.211	47.6432	45.815	31.3122
58	hsa-miR-1247-3p	21.9722	-3.49221	0.972687	-3.59028	0.000330328	0.00193158	12.9364	35.2703	73.1548	6.97218	1.09083	2.40863
60	hsa-miR-296-3p	102.365	2.14805	0.604396	3.55403	0.00037937	0.00218138	33.6346	37.0338	42.6736	126.661	246.528	127.658
61	hsa-miR-125b-1-3p	1102.92	-2.17824	0.614799	-3.543	0.000395597	0.00223739	2342.13	1372.6	1706.95	593.797	382.882	219.186
62	hsa-miR-1468-5p	97.8562	-2.81086	0.798281	-3.52114	0.000429697	0.00239106	255.494	189.872	67.8206	37.185	5.45416	31.3122
63	hsa-miR-16-2-3p	84.627	2.52371	0.76349	3.30549	0.000948088	0.00519191	15.5237	28.8041	30.4812	41.8331	106.902	284.219
64	hsa-miR-145-5p	1627.87	-2.21306	0.671578	-3.29531	0.00098314	0.00529974	2370.59	2478.33	3187.57	924.976	613.048	192.691
65	hsa-miR-452-5p	25.3119	2.51913	0.768416	3.27834	0.00104419	0.00554223	6.4682	9.40541	6.85827	23.2406	81.8124	24.0863
66	hsa-miR-1291	59.2249	-2.18683	0.676703	-3.2316	0.00123099	0.00643473	132.598	95.8176	63.2484	12.7823	31.6341	19.2691
67	hsa-miR-296-5p	34.1148	2.16247	0.671844	3.21871	0.00128767	0.00663054	6.4682	13.5203	17.5267	47.6432	66.5408	52.9899
68	hsa-miR-660-5p	62.4581	-2.24222	0.700971	-3.19874	0.00138032	0.00700308	107.372	55.2568	147.834	33.6989	18.5441	12.0432
69	hsa-miR-1271-5p	110.563	-1.99485	0.627184	-3.18064	0.00146951	0.00734755	99.6102	188.696	242.325	38.347	53.4508	40.9467
70	hsa-miR-363-3p	223.679	2.45288	0.784404	3.12706	0.00176562	0.00870199	34.9283	54.6689	117.353	159.198	181.078	794.849
71	hsa-miR-95-3p	174.18	1.87998	0.610669	3.07856	0.00208	0.0101071	66.6224	67.0135	89.1574	177.791	218.166	426.328
72	hsa-miR-107	291.447	1.87363	0.611316	3.06492	0.00217729	0.0104329	153.296	94.6419	126.497	433.437	263.981	676.826
73	hsa-miR-1-3p	79.3538	-3.3116	1.09509	-3.02405	0.00249417	0.01169	12.9364	31.7433	388.635	32.5368	5.45416	4.81726
75	hsa-miR-21-5p	14465.2	2.03289	0.67304	3.02046	0.00252393	0.01169	7476.59	4869.65	4697.91	11650.5	43360.6	14736
74	hsa-miR-140-3p	2063.61	-1.92137	0.63673	-3.01755	0.00254826	0.01169	1848.61	2846.9	5101.03	660.033	1267.55	657.557
76	hsa-miR-582-3p	14.3091	2.5488	0.845553	3.01436	0.00257519	0.01169	1.29364	2.93919	8.38232	25.5647	16.3625	31.3122
77	hsa-miR-140-5p	63.998	-2.25661	0.749998	-3.00882	0.00262263	0.0117507	51.7456	74.6554	192.031	15.1064	35.9975	14.4518
78	hsa-miR-495-3p	113.415	-2.45144	0.817281	-2.99951	0.00270415	0.0119606	209.57	102.872	264.424	77.856	18.5441	7.2259
81	hsa-miR-675-3p	33.3269	3.41648	1.1562	2.95492	0.00312752	0.0136094	0	2.93919	14.4786	109.231	70.9041	2.40863
82	hsa-miR-941	2822.04	1.66765	0.565688	2.94801	0.00319825	0.0136094	1527.79	1654.18	871.762	4214.68	4954.56	3709.29
80	hsa-miR-652-3p	324.568	1.6606	0.563508	2.9469	0.00320978	0.0136094	128.717	168.122	170.695	406.71	415.607	657.557
79	hsa-miR-132-3p	246.275	-1.71674	0.583032	-2.94451	0.0032347	0.0136094	448.246	336.243	349.772	109.231	157.08	77.0762
83	hsa-miR-6842-3p	22.6478	2.36797	0.807676	2.93183	0.00336972	0.0140067	7.11502	2.93919	12.1925	15.1064	59.9958	38.5381
84	hsa-miR-4508	42.144	-2.1656	0.744515	-2.90874	0.00362887	0.0149043	46.571	84.0608	73.9169	10.4583	6.54499	31.3122
85	hsa-miR-34c-5p	242.386	-2.27382	0.792817	-2.86803	0.0041304	0.0167645	672.046	405.608	128.021	159.198	31.6341	57.8072
86	hsa-miR-155-5p	1375.06	1.92704	0.682001	2.82556	0.00471977	0.018934	609.951	553.743	553.995	636.792	3234.32	2661.54
87	hsa-miR-502-3p	482.934	-1.63371	0.599899	-2.72331	0.0064632	0.0256299	512.281	634.277	1045.5	323.044	189.805	192.691
88	hsa-miR-99a-3p	33.7502	-2.05307	0.755332	-2.71811	0.00656562	0.0257402	33.6346	34.0946	95.2537	17.4304	7.63583	14.4518
89	hsa-miR-146a-5p	679.616	2.29804	0.847486	2.7116	0.00669603	0.0259565	151.356	131.088	406.924	185.925	2383.47	818.935
90	hsa-miR-214-3p	2685.66	-1.76665	0.653641	-2.70279	0.00687608	0.0263583	4061.38	3934.4	4460.16	1175.97	2014.77	467.275
91	hsa-miR-195-3p	759.326	-1.92349	0.715971	-2.68654	0.0072196	0.027371	405.556	1686.51	1514.91	382.308	422.152	144.518
93	hsa-miR-766-3p	11.7722	2.27476	0.857771	2.65194	0.00800296	0.0297964	3.2341	4.11487	4.57218	5.81015	23.9983	28.9036
92	hsa-miR-454-3p	21.2734	2.05679	0.775938	2.65072	0.00803206	0.0297964	12.2896	5.87838	6.09624	27.8887	15.2717	60.2158
94	hsa-miR-106b-3p	3552.35	1.72368	0.652365	2.6422	0.00823684	0.030231	2482.49	1525.44	944.917	3587.19	3948.81	8825.23
97	hsa-miR-16-5p	156.723	1.87851	0.716714	2.621	0.00876725	0.0315991	36.2219	48.7906	115.828	106.907	239.983	392.607
95	hsa-miR-1260b	59.2598	1.96841	0.75168	2.61868	0.00882695	0.0315991	24.5792	31.1554	16.7646	190.573	37.0883	55.3985
99	hsa-miR-532-3p	248.402	-1.65573	0.633558	-2.61338	0.00896526	0.0315991	508.4	420.304	202.7	166.17	79.6308	113.206
96	hsa-miR-139-3p	28.6638	-1.96464	0.752582	-2.61054	0.00903996	0.0315991	21.3451	44.6757	71.6308	15.1064	11.9992	7.2259
98	hsa-miR-328-3p	4686.23	-1.93448	0.741322	-2.6095	0.00906757	0.0315991	10823.2	9969.73	1494.34	2439.1	1902.41	1488.53
100	hsa-miR-7706	259.93	1.85845	0.715367	2.5979	0.00937951	0.0323593	177.875	115.216	43.4357	389.28	193.077	640.696
101	hsa-miR-4683	6.58741	2.95156	1.14893	2.56898	0.0101999	0.0348412	0.64682	3.52703	0	5.81015	5.45416	24.0863
102	hsa-miR-2277-5p	23.0538	1.84412	0.720227	2.56047	0.010453	0.0353559	8.40866	12.9324	8.38232	17.4304	38.1791	52.9899
103	hsa-miR-1246	141.873	2.57628	1.01144	2.54714	0.0108609	0.0363787	21.9919	25.277	74.6789	20.9165	55.6324	652.739
105	hsa-miR-450a-5p	72.0314	-2.13247	0.846691	-2.51859	0.0117826	0.0390148	59.5074	92.8784	201.176	51.1293	25.0891	2.40863
104	hsa-miR-450a-2-3p	23.7123	-2.06704	0.821601	-2.51587	0.0118741	0.0390148	21.3451	27.6284	67.0586	15.1064	8.72666	2.40863
106	hsa-miR-30d-5p	23891.1	1.39768	0.557443	2.5073	0.0121658	0.0395962	14495.2	14835.9	10106	35203.7	25704.4	43001.3
108	hsa-miR-199a-5p	5229.93	-1.79254	0.721314	-2.4851	0.0129514	0.0414669	8633.1	6654.33	9065.1	1875.52	4496.41	655.148
107	hsa-miR-1247-5p	23.333	-2.04011	0.821203	-2.48429	0.0129809	0.0414669	25.226	64.0744	24.3849	16.2684	7.63583	2.40863
109	hsa-miR-485-5p	189.947	-1.76787	0.720949	-2.45214	0.014201	0.0449481	356.398	296.27	230.133	153.388	81.8124	21.6777
110	hsa-miR-379-5p	283.44	-1.5905	0.651109	-2.44275	0.0145759	0.0457153	304.005	363.284	611.148	189.411	170.17	62.6244
111	hsa-miR-411-5p	113.581	-1.83181	0.751064	-2.43895	0.0147299	0.0457821	92.4952	136.378	304.812	75.5319	57.8141	14.4518
112	hsa-miR-29c-3p	14.8357	-2.24925	0.924576	-2.43273	0.0149853	0.0461601	6.4682	23.5135	44.1977	6.97218	5.45416	2.40863
113	hsa-miR-190b	4.99997	-3.21335	1.32379	-2.42739	0.0152078	0.0464308	12.9364	8.22973	5.33421	0	1.09083	2.40863
114	hsa-miR-134-5p	653.04	-1.59357	0.659139	-2.41765	0.0156211	0.0472744	836.985	789.467	1318.31	540.344	293.434	139.701
115	hsa-miR-339-5p	64.4631	1.70795	0.720397	2.37085	0.0177473	0.0532418	20.0514	21.75	49.5319	119.689	139.627	36.1295
116	hsa-miR-497-5p	54.5104	-1.70007	0.72305	-2.35125	0.0187103	0.0553898	32.341	78.1825	140.213	23.2406	33.8158	19.2691
117	hsa-miR-99a-5p	95290.7	-1.41609	0.602646	-2.34978	0.0187844	0.0553898	110769	134662	170464	41985.3	32890.8	80973.4
118	hsa-miR-432-5p	373.812	-1.60587	0.698244	-2.29987	0.0214558	0.0627308	791.707	354.466	543.327	345.123	116.719	91.528
119	hsa-miR-500a-3p	707.701	-1.28889	0.56153	-2.29532	0.0217146	0.0629541	1183.68	783.588	1046.27	534.534	339.249	358.886
120	hsa-miR-27a-5p	105.6	1.31634	0.577641	2.27883	0.0226773	0.0651974	59.5074	58.196	64.0105	113.879	200.713	137.292
121	hsa-miR-887-5p	25.0395	-2.14168	0.941541	-2.27465	0.0229268	0.0653697	86.027	31.7433	5.33421	8.13421	14.1808	4.81726
123	hsa-miR-9-5p	59.3737	-1.82221	0.819233	-2.22429	0.026129	0.0737777	21.3451	58.7838	198.128	32.5368	26.18	19.2691
122	hsa-miR-374a-3p	17.27	-1.82094	0.819612	-2.2217	0.0263033	0.0737777	12.9364	32.9189	35.0534	3.48609	11.9992	7.2259
124	hsa-miR-381-3p	1776.56	-1.70522	0.76941	-2.21627	0.0266729	0.0742108	1417.83	1965.14	4776.4	1394.44	891.21	214.368
125	hsa-miR-455-5p	406.163	-1.33953	0.615304	-2.17702	0.0294789	0.0813619	653.288	378.568	716.308	320.72	235.62	132.475
126	hsa-miR-27a-3p	2832.17	1.40616	0.647422	2.17193	0.0298607	0.0817613	648.76	1469.01	2537.56	3316.43	4517.14	4504.14
127	hsa-miR-106b-5p	27.8548	1.48524	0.686868	2.16234	0.0305916	0.0831032	20.6982	9.99325	12.9545	42.9951	25.0891	55.3985
128	hsa-miR-342-5p	141.12	-1.22401	0.571281	-2.14258	0.032147	0.0866463	201.808	168.71	221.751	62.7496	90.5391	101.163
129	hsa-miR-212-5p	41.2254	-1.47663	0.691579	-2.13516	0.0327483	0.0875826	80.8525	67.6014	34.2913	17.4304	32.725	14.4518
130	hsa-let-7e-3p	46.6702	-1.49912	0.704846	-2.12688	0.0334299	0.0887178	104.138	71.7162	31.2432	17.4304	33.8158	21.6777
131	hsa-miR-484	937.373	1.61552	0.76117	2.12242	0.0338028	0.0890227	794.941	493.784	95.2537	1494.37	1898.05	847.839
133	hsa-miR-193b-5p	62.067	-1.76942	0.83577	-2.11711	0.0342502	0.0890943	24.5792	61.723	202.7	42.9951	28.3616	12.0432
132	hsa-miR-1254	35.3902	1.42027	0.671209	2.11598	0.0343465	0.0890943	27.8132	20.5743	9.14435	55.7774	43.6333	55.3985
134	hsa-miR-424-3p	1720.89	-1.69038	0.800535	-2.11157	0.0347234	0.0893999	1195.32	3219.59	3469.52	1698.89	554.143	187.873
135	hsa-miR-340-3p	23.1926	1.47953	0.703196	2.10401	0.0353773	0.0904086	17.4641	11.1689	8.38232	31.3748	49.0875	21.6777
136	hsa-miR-24-2-5p	59.6669	1.3346	0.635937	2.09863	0.0358494	0.090502	31.0473	25.277	44.9597	52.2913	83.9941	120.432
137	hsa-miR-34c-3p	15.363	-1.70278	0.811765	-2.09762	0.0359385	0.090502	35.5751	17.6351	16.7646	9.29624	3.2725	9.63453
138	hsa-miR-125b-5p	20454.9	-1.35068	0.649534	-2.07945	0.0375756	0.093939	33603.6	43261.9	11295.6	14155.8	9426.97	10985.8
139	hsa-let-7c-5p	65260.8	-1.18491	0.578457	-2.0484	0.0405208	0.100573	89380.8	76008.1	106558	32262.6	28784.9	58570.7
140	hsa-miR-29b-3p	40.3993	-1.43401	0.708488	-2.02404	0.0429663	0.105881	27.1664	54.0811	96.0157	18.5925	27.2708	19.2691
141	hsa-miR-24-3p	1678.08	1.20413	0.596343	2.01918	0.0434682	0.106358	678.514	854.717	1514.15	1687.27	2674.72	2659.13
142	hsa-miR-139-5p	420.767	-1.34019	0.671817	-1.99487	0.0460568	0.111899	227.034	526.703	1056.17	227.758	250.891	236.046
143	hsa-miR-330-5p	46.3201	1.39054	0.702064	1.98064	0.0476317	0.114916	46.571	17.6351	12.1925	61.5876	55.6324	84.3021
144	hsa-miR-374a-5p	42.218	-1.4382	0.729587	-1.97125	0.0486949	0.116665	32.9878	59.3716	92.2056	9.29624	30.5433	28.9036
145	hsa-miR-433-3p	460.698	-1.48701	0.764551	-1.94495	0.0517811	0.123203	1146.81	561.973	329.959	465.974	179.987	79.4849
146	hsa-let-7b-5p	139804	-1.19826	0.618203	-1.9383	0.0525866	0.124263	87751.4	224176	272296	80890.1	97121.2	76592.1
147	hsa-miR-2110	218.681	-1.11478	0.576659	-1.93316	0.053216	0.124576	195.34	326.25	376.443	141.768	149.444	122.84
148	hsa-miR-320a	14923.8	-1.34336	0.695561	-1.93134	0.0534413	0.124576	11192.6	16377.8	36658.2	4170.52	7537.65	13606.4
149	hsa-miR-34b-3p	26.7002	-1.88045	0.977583	-1.92357	0.0544079	0.125978	71.1502	45.2635	9.90638	25.5647	1.09083	7.2259
150	hsa-miR-345-5p	262.014	1.03645	0.551448	1.8795	0.0601759	0.138405	162.352	145.196	208.034	411.359	339.249	305.896
151	hsa-miR-4324	46.6505	-1.52086	0.813362	-1.86985	0.0615053	0.140525	100.257	96.4054	10.6684	22.0786	23.9983	26.495
152	hsa-miR-23a-3p	2693.87	1.11142	0.599125	1.85507	0.0635865	0.144325	1150.69	1778.8	2183.98	2351.95	3516.84	5180.97
153	hsa-miR-127-5p	29.1849	-1.40235	0.762206	-1.83986	0.0657884	0.148346	34.9283	38.7973	54.8661	25.5647	18.5441	2.40863
154	hsa-miR-769-3p	15.8707	1.49978	0.818309	1.83278	0.0668347	0.149727	16.1705	5.29054	3.04812	16.2684	20.7258	33.7209
155	hsa-miR-148a-3p	45255.4	-1.10502	0.605557	-1.82481	0.0680302	0.151422	53689.9	40844.8	90824.8	18570.4	36102.2	31500.1
156	hsa-miR-511-5p	36.6003	1.16936	0.647143	1.80696	0.0707689	0.156508	18.7578	21.75	26.671	30.2128	52.3599	69.8503
157	hsa-miR-29a-3p	2888.79	-1.08226	0.614359	-1.76161	0.0781352	0.171698	2794.91	3625.2	5352.49	1021.42	2573.27	1965.44
158	hsa-miR-132-5p	70.9281	-1.03039	0.586919	-1.75559	0.0791587	0.171959	102.198	105.223	78.489	40.671	55.6324	43.3554
159	hsa-miR-143-5p	161.456	-1.14338	0.651481	-1.75505	0.0792507	0.171959	227.681	136.378	304.05	156.874	88.3574	55.3985
160	hsa-miR-184	41.4573	-1.65505	0.946441	-1.74871	0.0803419	0.173237	156.53	7.6419	25.147	25.5647	21.8166	12.0432
161	hsa-miR-25-3p	4216.49	1.14469	0.656284	1.7442	0.081124	0.173837	3417.15	2112.1	2348.57	3271.11	3665.2	10484.8
165	hsa-miR-26a-5p	57432	-0.953037	0.549236	-1.7352	0.0827045	0.174595	57256.5	80147	89818.9	32882	46672.4	37815.5
164	hsa-miR-22-5p	31.143	1.47401	0.850343	1.73344	0.0830183	0.174595	11.6428	5.29054	32.7673	13.9444	77.4491	45.764
162	hsa-miR-199a-3p	20896.2	-1.22135	0.705212	-1.7319	0.0832919	0.174595	24920	27521.4	35305.6	7629.89	25087	4913.61
163	hsa-miR-199b-3p	20876.9	-1.22048	0.705186	-1.73072	0.083502	0.174595	24892.9	27490.8	35266	7627.56	25072.8	4911.2
167	hsa-miR-128-3p	1413.13	1.11052	0.648035	1.71367	0.0865899	0.179823	1426.88	892.338	364.25	1561.77	2022.4	2211.12
166	hsa-let-7b-3p	317.363	-1.04018	0.607865	-1.7112	0.0870449	0.179823	371.921	581.96	328.435	189.411	299.979	132.475
168	hsa-miR-1306-5p	36.3132	1.63278	0.955829	1.70823	0.0875933	0.179879	16.1705	35.8581	0.762029	76.694	18.5441	69.8503
169	hsa-miR-218-5p	131.385	1.34785	0.795501	1.69434	0.090201	0.18399	16.8173	44.0879	161.55	127.823	211.621	226.411
172	hsa-miR-3909	68.7668	1.15597	0.685175	1.68711	0.0915815	0.18399	31.0473	57.0203	40.3876	91.8004	153.807	38.5381
170	hsa-miR-27b-5p	44.1652	1.09388	0.648407	1.68703	0.0915985	0.18399	20.0514	35.8581	28.1951	34.8609	66.5408	79.4849
171	hsa-miR-361-3p	2328.01	1.0055	0.596256	1.68635	0.0917284	0.18399	1151.34	2179.7	1312.98	1985.91	4026.26	3311.87
173	hsa-miR-598-3p	9.4259	1.52109	0.90395	1.68272	0.0924301	0.184326	7.76184	1.76351	5.33421	6.97218	25.0891	9.63453
174	hsa-miR-127-3p	3133.88	-1.16075	0.700253	-1.65762	0.0973947	0.193061	5790.98	4031.39	3171.57	2730.77	2531.82	546.76
175	hsa-miR-22-3p	1070.01	1.18602	0.716641	1.65498	0.0979295	0.193061	399.088	486.142	1075.22	544.992	2529.64	1384.96
176	hsa-miR-192-5p	262.564	-0.931146	0.56639	-1.644	0.100176	0.196368	297.537	350.352	386.349	156.874	242.165	142.109
177	hsa-miR-223-3p	16.6143	1.8448	1.12558	1.63898	0.101217	0.197287	1.29364	5.87838	14.4786	0	37.0883	40.9467
178	hsa-miR-100-5p	18129.4	-1.15022	0.710752	-1.61831	0.105596	0.204392	29801.6	24145.5	21043.4	23110.4	5496.7	5178.56
179	hsa-miR-125a-3p	164.784	-0.986669	0.610479	-1.61622	0.106047	0.204392	173.995	193.987	289.571	72.0458	160.352	98.7539
180	hsa-miR-142-5p	34.862	1.63887	1.02245	1.60288	0.10896	0.20884	3.2341	2.93919	44.9597	12.7823	97.0841	48.1726
181	hsa-miR-574-3p	2711.81	-0.999661	0.636629	-1.57024	0.116359	0.221789	3853.11	5115.95	1878.4	1727.94	2575.46	1120.01
184	hsa-miR-450b-5p	34.2774	-1.36516	0.874337	-1.56137	0.118437	0.223514	26.5196	35.2703	87.6334	41.8331	11.9992	2.40863
182	hsa-miR-382-5p	297.628	-0.880717	0.56521	-1.55821	0.119183	0.223514	484.468	290.98	382.539	212.651	246.528	168.604
183	hsa-miR-4497	29.5358	-1.21651	0.780762	-1.55811	0.119207	0.223514	30.4005	35.8581	55.6281	6.97218	9.81749	38.5381
187	hsa-miR-29c-5p	69.6576	-1.02257	0.661971	-1.54474	0.12241	0.227529	64.682	104.635	112.018	38.347	74.1766	24.0863
185	hsa-miR-1226-3p	30.1834	1.29034	0.836509	1.54253	0.122946	0.227529	34.2814	14.696	3.04812	26.7267	34.9066	67.4417
186	hsa-miR-1287-5p	57.5852	0.978531	0.635016	1.54096	0.123328	0.227529	53.0392	34.6824	28.9571	110.393	65.4499	52.9899
193	hsa-miR-4443	43.1988	0.983819	0.641401	1.53386	0.125064	0.229166	27.8132	31.1554	27.4331	59.2635	31.6341	81.8935
191	hsa-miR-193a-5p	785.82	-1.02077	0.668195	-1.52765	0.1266	0.229166	481.881	1334.39	1341.93	263.781	734.13	558.803
188	hsa-miR-125b-2-3p	1627.36	-0.884423	0.579482	-1.52623	0.126953	0.229166	2052.36	2428.36	1850.97	936.596	805.034	1690.86
192	hsa-miR-431-3p	56.504	-1.23965	0.812592	-1.52555	0.127122	0.229166	141.654	50.5541	47.2458	65.0737	27.2708	7.2259
190	hsa-miR-150-5p	279.081	1.25877	0.827005	1.52209	0.127988	0.229166	95.7293	178.703	219.464	68.5598	863.939	248.089
189	hsa-miR-148a-5p	130.146	-0.909451	0.597836	-1.52124	0.1282	0.229166	228.327	134.027	147.072	62.7496	112.356	96.3453
194	hsa-miR-1301-3p	596.628	0.969892	0.640054	1.51533	0.129689	0.230633	710.855	283.338	215.654	857.578	731.948	780.397
195	hsa-miR-1294	11.5342	-1.39484	0.924126	-1.50936	0.131208	0.232137	6.4682	21.1622	23.6229	8.13421	9.81749	0
196	hsa-miR-877-5p	73.3447	1.14332	0.762609	1.49923	0.133815	0.235541	62.7415	45.8514	27.4331	42.9951	49.0875	211.96
197	hsa-miR-125a-5p	23839.8	-1.11991	0.752782	-1.4877	0.136831	0.239628	44034.8	48028.1	5901.16	13925.8	18792.9	12356.3
198	hsa-miR-664a-3p	58.9522	-1.06158	0.717716	-1.47911	0.139111	0.24239	109.313	105.223	24.3849	30.2128	43.6333	40.9467
199	hsa-miR-664a-5p	63.6303	-0.930246	0.632872	-1.46988	0.141594	0.245477	96.3761	82.2973	70.1067	33.6989	29.4525	69.8503
200	hsa-let-7e-5p	7577.37	-0.844588	0.578671	-1.45953	0.144419	0.249123	13105.9	7612.5	8483.67	3648.77	6603.9	6009.54
201	hsa-miR-92a-3p	58835.7	1.07432	0.759226	1.41502	0.157064	0.269587	40910.1	63704	9051.39	106947	37886.8	94514.7
202	hsa-miR-6747-3p	39.4569	1.02326	0.730568	1.40064	0.161321	0.275524	44.6306	24.1014	9.14435	68.5598	34.9066	55.3985
203	hsa-miR-1292-5p	31.9831	0.915886	0.6554	1.39745	0.16228	0.275795	25.8728	18.8108	21.3368	46.4812	23.9983	55.3985
204	hsa-miR-135a-5p	15.0847	-1.04838	0.762991	-1.37403	0.169431	0.286538	16.1705	28.8041	15.2406	9.29624	6.54499	14.4518
205	hsa-miR-7704	328.211	-1.05007	0.768534	-1.36633	0.171836	0.289187	248.379	522	555.519	55.7774	151.626	435.962
206	hsa-miR-29b-2-5p	13.1444	-1.06348	0.791189	-1.34416	0.178897	0.299597	25.226	13.5203	15.2406	6.97218	13.09	4.81726
207	hsa-miR-425-3p	147.081	0.762062	0.568067	1.3415	0.179758	0.299597	132.598	87	108.208	213.813	196.35	144.518
208	hsa-miR-221-3p	5214.19	0.816895	0.615071	1.32813	0.184135	0.305416	5083.36	2179.12	4065.43	5044.37	5210.91	9701.97
209	hsa-miR-654-3p	183.26	-0.892596	0.673632	-1.32505	0.185155	0.305638	290.422	180.466	245.373	189.411	150.535	43.3554
210	hsa-miR-487b-3p	52.8653	-0.962675	0.7315	-1.31603	0.188165	0.309128	108.666	45.8514	56.3902	60.4255	33.8158	12.0432
211	hsa-let-7d-5p	8213.65	0.706354	0.539719	1.30875	0.190621	0.311085	6686.82	5606.8	6432.29	9677.38	8259.78	12618.8
212	hsa-miR-324-5p	35.2663	0.9411	0.719959	1.30716	0.191159	0.311085	40.7496	18.8108	12.1925	34.8609	32.725	72.259
213	hsa-miR-744-5p	1544.49	-0.730478	0.562762	-1.29802	0.194279	0.314678	2244.46	1998.65	1538.54	799.476	1387.54	1298.25
214	hsa-miR-501-3p	330.304	-0.877969	0.679359	-1.29235	0.196236	0.316362	699.859	376.804	205.748	254.485	122.173	322.757
215	hsa-miR-26b-5p	3795.39	-0.718802	0.56178	-1.27951	0.200718	0.322083	3971.47	4863.77	5328.87	2239.23	2414.01	3954.97
216	hsa-let-7f-1-3p	11.8642	-1.11967	0.894272	-1.25204	0.210554	0.336302	16.1705	9.40541	24.3849	8.13421	13.09	0
217	hsa-miR-543	733.394	-1.07325	0.868014	-1.23645	0.216293	0.343875	2032.95	710.696	240.039	1006.32	234.529	175.83
219	hsa-miR-6511a-3p	20.7976	-0.994089	0.808532	-1.2295	0.218885	0.34613	42.0433	33.5068	7.62029	19.7545	9.81749	12.0432
218	hsa-miR-508-3p	712.864	-1.45494	1.1855	-1.22728	0.219717	0.34613	1906.18	470.27	758.219	1063.26	2.18166	77.0762
220	hsa-miR-615-3p	1334.07	-1.05802	0.869226	-1.2172	0.22353	0.350535	3060.75	2197.93	149.358	1080.69	1070.11	445.597
221	hsa-miR-654-5p	175.306	-0.871253	0.72651	-1.19923	0.230438	0.359734	351.223	161.068	169.171	217.3	114.537	38.5381
223	hsa-miR-181a-2-3p	291.274	-0.762122	0.640882	-1.18918	0.23437	0.363278	579.551	355.642	164.598	240.54	229.075	178.239
222	hsa-miR-151a-3p	10481	0.728728	0.613383	1.18805	0.234814	0.363278	8345.92	8016.94	7302.53	7545.06	10014.9	21660.8
224	hsa-miR-92a-1-5p	93.2299	0.689313	0.587811	1.17268	0.240924	0.370816	58.2138	87	68.5827	134.795	80.7216	130.066
225	hsa-miR-92b-3p	2245.26	0.849084	0.725459	1.17041	0.241837	0.370816	2309.79	2129.74	369.584	2958.53	3620.47	2083.47
226	hsa-miR-19b-3p	14.7596	-0.941396	0.81688	-1.15243	0.249145	0.380333	10.3491	18.223	29.7191	16.2684	4.36333	9.63453
227	hsa-let-7d-3p	3730.52	0.732218	0.638519	1.14674	0.251487	0.382216	3390.63	3669.29	1350.32	5031.59	2808.89	6132.38
228	hsa-miR-6511b-3p	33.6846	-0.977864	0.883858	-1.10636	0.268571	0.406391	62.7415	67.6014	3.81015	29.0507	19.635	19.2691
229	hsa-miR-148b-5p	19.1373	0.897416	0.816086	1.09966	0.271481	0.408999	22.6387	7.05406	9.90638	29.0507	7.63583	38.5381
230	hsa-miR-10b-5p	30149.4	-0.845552	0.773845	-1.09266	0.274542	0.4109	46519.9	43615.8	26082	7231.31	9341.89	48105.2
231	hsa-miR-1180-3p	1366.83	-0.707493	0.648899	-1.0903	0.275582	0.4109	2823.37	1466.66	795.559	1102.77	738.493	1274.17
232	hsa-miR-3609	35.2107	0.779107	0.715673	1.08863	0.276315	0.4109	13.5832	30.5676	32.7673	26.7267	30.5433	77.0762
233	hsa-miR-126-5p	19.6951	-0.950117	0.87567	-1.08502	0.277914	0.411504	9.7023	9.99325	58.6763	11.6203	18.5441	9.63453
234	hsa-miR-23b-3p	4955.83	0.690943	0.642222	1.07586	0.281988	0.414522	2624.15	3815.66	4933.38	2686.61	6866.79	8808.37
235	hsa-miR-3928-3p	21.5135	0.804165	0.748031	1.07504	0.282356	0.414522	6.4682	19.3987	21.3368	17.4304	40.3608	24.0863
237	hsa-miR-5701	15.0663	-0.834909	0.782696	-1.06671	0.286103	0.417466	12.2896	12.3446	33.5293	12.7823	9.81749	9.63453
236	hsa-miR-32-5p	19.4514	-0.742748	0.697278	-1.06521	0.286781	0.417466	25.8728	16.4595	30.4812	13.9444	13.09	16.8604
238	hsa-miR-193b-3p	176.025	-0.821603	0.780939	-1.05207	0.292767	0.42439	75.6779	122.858	477.03	151.064	166.897	62.6244
239	hsa-miR-222-3p	4106.32	0.611982	0.585057	1.04602	0.295551	0.426633	4365.39	2229.08	3149.47	3964.85	4156.07	6773.07
240	hsa-miR-509-3p	1553.06	-1.19233	1.16758	-1.0212	0.307161	0.441543	4233.44	783	1466.14	2657.56	11.9992	166.196
241	hsa-miR-151a-5p	133.767	0.687354	0.682555	1.00703	0.31392	0.449387	102.844	116.392	86.8714	87.1522	93.8116	315.531
242	hsa-miR-25-5p	88.2976	0.586118	0.585249	1.00148	0.316593	0.451341	77.6184	77.0068	57.1522	77.856	134.172	105.98
243	hsa-miR-148b-3p	3806.09	0.58313	0.592586	0.984042	0.325095	0.461554	4576.25	2277.87	2286.85	4096.16	3717.56	5881.88
244	hsa-miR-487a-5p	23.6392	-0.682212	0.700768	-0.97352	0.330295	0.467016	40.7496	22.3378	25.147	23.2406	20.7258	9.63453
245	hsa-miR-324-3p	62.2892	0.561948	0.58468	0.961121	0.336492	0.473835	60.1542	43.5	47.2458	85.9902	62.1774	74.6676
246	hsa-miR-664b-5p	12.2645	-0.728207	0.763102	-0.954272	0.339946	0.476754	14.8769	11.1689	19.8128	10.4583	7.63583	9.63453
247	hsa-let-7g-5p	37982.6	-0.50746	0.535706	-0.947273	0.343499	0.479787	45745.7	44649.8	43387.7	24829.1	31568.7	37714.4
248	hsa-miR-361-5p	316.458	0.523529	0.556393	0.940934	0.346738	0.482358	227.034	268.054	283.475	270.753	401.426	448.006
249	hsa-miR-708-5p	200.103	-0.570891	0.609745	-0.936278	0.34913	0.483734	210.863	254.534	252.232	85.9902	235.62	161.378
250	hsa-miR-455-3p	439.183	-0.606338	0.651449	-0.930754	0.351981	0.485734	657.816	422.068	512.084	381.146	524.69	137.292
251	hsa-miR-99b-3p	1463.16	-0.581069	0.636559	-0.912828	0.361333	0.496653	2790.38	1563.06	907.577	782.046	1276.27	1459.63
252	hsa-miR-514a-3p	1296.24	-1.09827	1.22982	-0.893037	0.371837	0.509063	3093.09	725.98	1482.91	2356.6	3.2725	115.614
253	hsa-miR-320d	252.762	0.730454	0.821825	0.888819	0.3741	0.510137	144.888	173.412	250.708	102.259	93.8116	751.493
255	hsa-miR-618	8.31757	-0.915429	1.04624	-0.874972	0.381589	0.516403	0.64682	12.3446	19.8128	4.64812	7.63583	4.81726
254	hsa-miR-326	18.1273	0.720654	0.823804	0.874788	0.381689	0.516403	12.2896	22.9257	6.09624	10.4583	42.5425	14.4518
257	hsa-miR-874-3p	292.344	-0.551991	0.63589	-0.868061	0.385361	0.51793	307.886	447.345	288.809	201.031	386.155	122.84
256	hsa-miR-548o-3p	21.2232	0.625521	0.721292	0.867223	0.38582	0.51793	8.40866	14.1081	27.4331	22.0786	23.9983	31.3122
259	hsa-miR-340-5p	74.6595	0.542776	0.648313	0.837212	0.402473	0.53804	49.8051	43.5	89.9195	116.203	100.357	48.1726
260	hsa-miR-503-5p	84.5679	0.619234	0.742138	0.834391	0.404061	0.53804	45.9242	81.1217	73.9169	189.411	90.5391	26.495
258	hsa-miR-30b-5p	163.114	-0.657764	0.7907	-0.831876	0.405479	0.53804	79.5588	112.865	405.4	106.907	52.3599	221.594
261	hsa-miR-758-3p	29.1668	-0.606556	0.742089	-0.817362	0.413721	0.546873	42.6901	29.9797	34.2913	34.8609	28.3616	4.81726
262	hsa-miR-671-3p	214.067	0.610797	0.753798	0.810293	0.417772	0.550119	281.367	186.933	40.3876	285.859	350.157	139.701
263	hsa-miR-149-5p	585.495	0.499535	0.623938	0.800617	0.423353	0.555349	633.883	506.716	315.48	1027.23	637.046	392.607
264	hsa-miR-30c-5p	2891.36	-0.422368	0.537992	-0.785081	0.432406	0.564585	3579.5	2954.47	3400.18	2489.07	1986.41	2938.53
265	hsa-miR-329-3p	48.4734	-0.574769	0.734123	-0.782933	0.433666	0.564585	100.904	35.8581	38.1015	65.0737	31.6341	19.2691
266	hsa-miR-152-3p	1108.07	-0.510234	0.659128	-0.774104	0.438869	0.56921	1793.63	964.054	1149.14	498.511	1614.43	628.653
267	hsa-miR-1343-3p	29.848	0.734166	0.980526	0.748747	0.45401	0.586642	32.9878	31.1554	2.28609	32.5368	5.45416	74.6676
268	hsa-miR-30c-2-3p	191.995	-0.430642	0.580117	-0.742337	0.457883	0.589439	310.473	199.277	151.644	163.846	170.17	156.561
269	hsa-miR-3605-3p	35.6555	-0.562623	0.768858	-0.731765	0.464312	0.595493	69.2097	48.2027	9.90638	30.2128	25.0891	31.3122
270	hsa-miR-323a-3p	103.503	-0.589001	0.815395	-0.72235	0.470079	0.600657	249.672	89.9392	34.2913	139.444	76.3583	31.3122
271	hsa-let-7a-3p	28.1345	-0.456823	0.645308	-0.707915	0.478998	0.609795	25.8728	31.7433	39.6255	19.7545	22.9075	28.9036
272	hsa-miR-505-3p	350.756	0.42313	0.601791	0.703117	0.481983	0.611338	304.005	412.662	182.887	457.84	470.149	276.993
273	hsa-miR-30b-3p	55.7701	-0.438269	0.638508	-0.686395	0.492464	0.621088	48.5115	68.7771	73.9169	36.0229	32.725	74.6676
274	hsa-miR-99b-5p	14113.4	-0.438984	0.640743	-0.685117	0.49327	0.621088	25374.7	16078.5	7278.91	8676.88	12665.7	14605.9
275	hsa-miR-1248	32.6113	-0.454281	0.682504	-0.665609	0.505661	0.633849	42.0433	38.2095	33.5293	46.4812	18.5441	16.8604
278	hsa-miR-34a-5p	154.044	-0.420251	0.637867	-0.658838	0.51	0.633849	258.081	155.189	115.828	79.018	190.896	125.249
277	hsa-miR-191-5p	4699.07	0.356403	0.542921	0.656454	0.511532	0.633849	5272.23	3797.43	3295.02	5606.79	4936.02	5286.95
279	hsa-miR-365a-3p	86.9585	-0.385524	0.589753	-0.653704	0.513303	0.633849	77.6184	95.2298	123.449	87.1522	82.9033	55.3985
280	hsa-miR-365b-3p	86.9585	-0.385524	0.589753	-0.653704	0.513303	0.633849	77.6184	95.2298	123.449	87.1522	82.9033	55.3985
276	hsa-miR-146b-5p	5089.41	0.409047	0.627412	0.651959	0.514428	0.633849	5815.56	3586.99	3715.66	2866.73	8799.74	5751.81
281	hsa-miR-194-5p	38.4295	0.419706	0.647301	0.648393	0.516731	0.634154	33.6346	26.4527	38.1015	24.4026	50.1783	57.8072
282	hsa-miR-339-3p	110.969	-0.462643	0.71629	-0.645888	0.518352	0.634154	46.571	102.284	237.753	98.7725	117.81	62.6244
283	hsa-miR-629-5p	187.951	-0.494947	0.770977	-0.641975	0.52089	0.635007	41.3965	268.054	350.534	112.717	222.53	132.475
284	hsa-miR-186-5p	671.539	0.433706	0.696036	0.623108	0.533213	0.647742	344.108	430.885	938.058	388.118	579.232	1348.83
285	hsa-miR-362-5p	48.7867	-0.380185	0.618542	-0.614647	0.538788	0.652217	59.5074	46.4392	60.2003	59.2635	35.9975	31.3122
286	hsa-miR-6087	17.7997	0.60674	0.99428	0.61023	0.541709	0.653461	9.05548	12.3446	19.8128	2.32406	5.45416	57.8072
287	hsa-miR-92b-5p	165.417	0.337816	0.56547	0.597407	0.550236	0.661433	137.773	155.777	144.786	131.309	230.166	192.691
288	hsa-miR-1275	19.3343	-0.451723	0.816893	-0.552977	0.580279	0.695126	27.1664	29.9797	10.6684	31.3748	11.9992	4.81726
289	hsa-miR-181a-5p	7954.35	0.341563	0.622209	0.548953	0.583038	0.696014	8092.36	7706.56	5253.43	8689.66	13566.7	4417.43
290	hsa-miR-584-5p	11.4652	0.401898	0.741571	0.541955	0.58785	0.699338	10.3491	9.99325	9.14435	13.9444	10.9083	14.4518
292	hsa-miR-331-5p	61.9622	0.324572	0.612705	0.529737	0.596295	0.706884	42.6901	50.5541	72.3928	60.4255	92.7207	52.9899
291	hsa-miR-320e	25.1724	0.481695	0.914274	0.526861	0.59829	0.706884	14.23	17.0473	30.4812	6.97218	7.63583	74.6676
293	hsa-let-7i-5p	68876.2	0.278896	0.551641	0.505574	0.613155	0.721975	74991	59363.4	52364.4	60848.5	96449.2	69241
294	hsa-miR-126-3p	2733.77	-0.320949	0.678021	-0.473362	0.635955	0.746274	1538.78	1905.77	5665.69	1831.36	3293.22	2167.77
295	hsa-miR-30e-3p	1058.36	-0.252018	0.540478	-0.466288	0.64101	0.748675	1205.03	1178.03	1068.37	1120.2	742.857	1035.71
296	hsa-miR-330-3p	103.896	0.30159	0.64938	0.464428	0.642341	0.748675	152.649	78.1825	48.7699	118.527	138.536	86.7108
298	hsa-miR-493-3p	760.394	-0.311797	0.68889	-0.452607	0.650832	0.755124	998.043	571.379	958.633	1191.08	599.958	243.272
297	hsa-miR-150-3p	5.46678	0.491237	1.0901	0.450636	0.652252	0.755124	4.52774	4.7027	4.57218	0	14.1808	4.81726
299	hsa-miR-181b-5p	2057.99	-0.259669	0.612768	-0.423763	0.671739	0.775083	3098.27	2520.65	1109.51	1722.13	2336.56	1560.79
301	hsa-miR-589-5p	131.373	0.259191	0.63682	0.407009	0.684002	0.785841	66.6224	145.196	147.834	153.388	190.896	84.3021
300	hsa-miR-365a-5p	56.7652	-0.312601	0.772219	-0.404809	0.685618	0.785841	29.1069	59.3716	101.35	88.3143	47.9966	14.4518
302	hsa-miR-320c	629.478	0.321162	0.811659	0.395686	0.692336	0.790914	331.172	452.635	893.861	225.434	279.253	1594.51
303	hsa-miR-342-3p	344.78	-0.25258	0.647126	-0.39031	0.696307	0.792825	558.852	343.885	220.989	167.332	339.249	438.371
304	hsa-miR-505-5p	26.2499	0.246939	0.63924	0.386301	0.699274	0.793584	25.8728	22.3378	23.6229	32.5368	21.8166	31.3122
305	hsa-miR-23b-5p	98.81	0.217369	0.607163	0.358007	0.720338	0.814809	64.682	92.8784	115.828	74.3699	98.1749	146.927
306	hsa-miR-28-5p	101.073	-0.208247	0.61893	-0.336463	0.736522	0.830392	72.4438	89.3514	163.836	84.8282	118.901	77.0762
307	hsa-miR-409-5p	33.6725	-0.24887	0.767734	-0.324161	0.745816	0.838132	58.2138	18.223	34.2913	51.1293	30.5433	9.63453
308	hsa-miR-1296-5p	73.5382	0.188212	0.625938	0.300688	0.763652	0.85539	71.1502	63.4865	72.3928	59.2635	124.355	50.5813
309	hsa-miR-30e-5p	355.187	0.167153	0.562446	0.29719	0.766322	0.855602	247.085	305.676	451.121	342.799	389.427	395.016
310	hsa-let-7f-5p	21370.7	-0.165056	0.584927	-0.282183	0.777803	0.863258	26324.3	19602.6	21847.4	16965.6	13323.4	30160.9
311	hsa-miR-181d-5p	387.084	0.18113	0.643017	0.281688	0.778183	0.863258	406.203	348.588	332.245	192.897	339.249	703.321
312	hsa-miR-493-5p	1344.28	-0.174479	0.66378	-0.262856	0.792661	0.8765	1741.24	1068.1	1468.43	1922	1408.26	457.64
313	hsa-miR-197-3p	1809.71	0.193037	0.76103	0.253652	0.799764	0.881529	1606.05	3098.49	361.964	1366.55	2784.89	1640.28
314	hsa-miR-320b	1516.73	-0.183186	0.775237	-0.236297	0.813202	0.893486	905.548	1264.44	2667.1	476.432	817.033	2969.84
316	hsa-miR-494-3p	47.662	-0.197144	0.858922	-0.229524	0.818461	0.893753	51.0988	15.8716	86.8714	80.1801	44.7241	7.2259
315	hsa-miR-409-3p	757.431	0.179587	0.783155	0.229312	0.818626	0.893753	1470.22	429.122	232.419	1174.81	903.209	334.8
320	hsa-miR-760	114.743	-0.150371	0.68431	-0.219741	0.826073	0.897657	75.6779	91.7027	193.555	79.018	65.4499	183.056
319	hsa-miR-504-5p	318.416	0.128564	0.598791	0.214705	0.829997	0.897657	186.931	403.845	322.338	274.239	446.15	276.993
317	hsa-miR-30a-3p	839.261	-0.126581	0.594639	-0.212871	0.831428	0.897657	1265.83	730.095	632.484	1085.34	618.502	703.321
318	hsa-miR-451a	462.173	-0.202971	0.960324	-0.211357	0.832609	0.897657	71.797	261.588	1149.9	68.5598	474.512	746.676
321	hsa-let-7a-5p	148867	-0.109805	0.531684	-0.206523	0.836382	0.898916	126828	163052	173711	145423	152805	131386
322	hsa-miR-221-5p	142.364	0.123885	0.618604	0.200265	0.841273	0.901364	177.875	127.561	102.112	101.097	116.719	228.82
323	hsa-miR-10b-3p	145.516	0.146886	0.806611	0.182102	0.855503	0.913772	148.769	122.858	140.975	52.2913	46.9058	361.295
324	hsa-miR-30a-5p	2388.54	0.0943424	0.534879	0.176381	0.859995	0.915735	2767.74	1887.55	2276.18	2575.06	2382.38	2442.35
325	hsa-miR-423-3p	140.528	0.100969	0.646237	0.156241	0.875843	0.929741	173.348	164.007	70.1067	130.147	211.621	93.9367
326	hsa-miR-30c-1-3p	63.1897	-0.0877316	0.591542	-0.14831	0.882098	0.933509	77.6184	55.8446	62.4864	70.8838	66.5408	45.764
327	hsa-miR-769-5p	185.6	-0.082011	0.57353	-0.142993	0.886295	0.935082	238.03	173.412	160.788	210.327	128.718	202.325
328	hsa-miR-331-3p	106.102	-0.0974373	0.743443	-0.131062	0.895726	0.942151	166.233	132.264	31.2432	102.259	151.626	52.9899
330	hsa-miR-199b-5p	258.953	-0.0930401	0.781749	-0.119015	0.905263	0.946725	470.885	103.46	228.609	195.221	471.24	84.3021
335	hsa-miR-98-5p	502.757	0.0676194	0.599888	0.11272	0.910252	0.946725	613.832	365.635	492.271	412.521	356.702	775.58
331	hsa-miR-335-5p	9.35012	0.0869006	0.803258	0.108185	0.913849	0.946725	7.76184	11.7568	7.62029	12.7823	6.54499	9.63453
329	hsa-miR-130a-3p	156.601	0.0617635	0.586268	0.10535	0.916098	0.946725	150.709	149.311	159.264	197.545	94.9024	187.873
333	hsa-miR-500a-5p	17.1794	0.0796289	0.766258	0.103919	0.917233	0.946725	27.1664	6.46622	16.7646	18.5925	19.635	14.4518
334	hsa-miR-509-3-5p	2823.02	-0.19519	1.88208	-0.10371	0.9174	0.946725	5130.57	1252.1	2658.72	7682.18	9.81749	204.734
332	hsa-miR-485-3p	170.172	-0.101119	0.997858	-0.101336	0.919284	0.946725	361.572	146.96	20.5748	361.391	111.265	19.2691
336	hsa-miR-151b	15.1991	-0.0740149	0.831782	-0.0889836	0.929095	0.953981	15.5237	19.9865	9.90638	4.64812	9.81749	31.3122
337	hsa-miR-370-3p	3836.23	-0.0618782	0.726015	-0.0852299	0.932079	0.954205	5676.49	2854.54	3225.67	6442.29	3809.19	1009.22
339	hsa-miR-27b-3p	10799.2	-0.0493006	0.632906	-0.0778955	0.937911	0.954292	5619.57	11404.6	15926.4	6616.6	11238.8	13989.3
340	hsa-miR-365b-5p	23.6056	0.0516671	0.685933	0.0753238	0.939957	0.954292	23.2855	24.1014	21.3368	12.7823	23.9983	36.1295
338	hsa-miR-146b-3p	615.691	0.0491292	0.657775	0.07469	0.940461	0.954292	893.258	621.345	301.002	349.771	909.754	619.019
341	hsa-miR-935	2.58852	0.0867076	1.32155	0.0656104	0.947688	0.958805	5.17456	2.35135	0	2.32406	3.2725	2.40863
342	hsa-miR-5010-3p	23.4707	0.0476357	0.900053	0.0529254	0.957791	0.966193	41.3965	25.277	3.04812	41.8331	19.635	9.63453
343	hsa-miR-28-3p	2079.9	0.024705	0.538071	0.0459139	0.963379	0.968996	2057.53	2277.87	1850.97	1741.88	2535.09	2016.03
344	hsa-let-7i-3p	11.8972	-0.030084	0.765994	-0.0392745	0.968672	0.971487	9.7023	15.8716	9.90638	8.13421	10.9083	16.8604
345	hsa-miR-501-5p	49.2228	-0.0118501	0.640076	-0.0185136	0.985229	0.985229	76.3247	35.8581	35.8154	40.671	51.2691	55.3985
347	hsa-miR-202-3p	344.103	-3.45753	2.07155	-1.66905	NA	NA	555.618	504.953	832.136	170.818	1.09083	0
346	hsa-miR-133a-3p	38.7739	-3.31713	1.19941	-2.76564	NA	NA	5.82138	4.7027	201.176	13.9444	2.18166	4.81726
348	hsa-miR-506-3p	362.038	-0.489965	1.15935	-0.422619	NA	NA	975.404	124.034	169.933	845.958	8.72666	48.1726
349	hsa-miR-508-5p	213.534	-0.417737	2.13316	-0.19583	NA	NA	512.281	109.338	111.256	519.427	0	28.9036

## Sheet: Sheet 2
ovary: HGSOC VS benign, down-regulated
								добро	добро	добро	HGSOC	HGSOC	HGSOC
	Gene	baseMean	log2FoldChange	lfcSE	stat	pvalue	padj	s6	s8	s30	s18	s21	s34
30	hsa-miR-135a-3p	73.6386	-4.41775	0.925347	-4.77415	1.80465e-06	2.07534e-05	197.28	170.473	55.6281	16.2684	2.18166	0
53	hsa-miR-424-5p	37.3986	-3.63752	0.968101	-3.75738	0.000171701	0.00111768	9.7023	54.6689	144.024	8.13421	5.45416	2.40863
48	hsa-miR-542-3p	19.6629	-3.61195	0.933808	-3.86798	0.000109738	0.000788745	24.5792	25.277	60.2003	4.64812	3.2725	0
57	hsa-miR-204-3p	59.5595	-3.5051	0.96164	-3.64492	0.000267476	0.00161893	12.2896	72.3041	244.611	6.97218	16.3625	4.81726
58	hsa-miR-1247-3p	21.9722	-3.49221	0.972687	-3.59028	0.000330328	0.00193158	12.9364	35.2703	73.1548	6.97218	1.09083	2.40863
73	hsa-miR-1-3p	79.3538	-3.3116	1.09509	-3.02405	0.00249417	0.01169	12.9364	31.7433	388.635	32.5368	5.45416	4.81726
113	hsa-miR-190b	4.99997	-3.21335	1.32379	-2.42739	0.0152078	0.0464308	12.9364	8.22973	5.33421	0	1.09083	2.40863
28	hsa-miR-129-5p	178.39	-3.19576	0.654267	-4.88449	1.03695e-06	1.27768e-05	332.465	164.007	468.648	45.3192	26.18	33.7209
51	hsa-miR-136-3p	19.7575	-3.08122	0.818548	-3.76425	0.000167046	0.00110829	27.1664	32.9189	45.7218	4.64812	3.2725	4.81726
59	hsa-miR-195-5p	196	-3.06785	0.854262	-3.59122	0.000329129	0.00193158	39.456	301.561	710.211	47.6432	45.815	31.3122
39	hsa-miR-145-3p	357.682	-3.00735	0.690633	-4.35448	1.33382e-05	0.000117991	324.704	446.757	1138.47	112.717	75.2674	48.1726
62	hsa-miR-1468-5p	97.8562	-2.81086	0.798281	-3.52114	0.000429697	0.00239106	255.494	189.872	67.8206	37.185	5.45416	31.3122
52	hsa-miR-204-5p	207.737	-2.68727	0.713841	-3.76452	0.000166871	0.00110829	128.717	557.271	393.969	44.1571	86.1758	36.1295
46	hsa-miR-143-3p	21703.7	-2.55962	0.626152	-4.08786	4.35366e-05	0.000326525	26367	25818.4	59153.3	8795.4	5813.05	4275.32
41	hsa-miR-101-3p	993.943	-2.52744	0.589052	-4.29068	1.78125e-05	0.000149886	996.102	2179.7	1905.84	325.368	229.075	327.574
78	hsa-miR-495-3p	113.415	-2.45144	0.817281	-2.99951	0.00270415	0.0119606	209.57	102.872	264.424	77.856	18.5441	7.2259
85	hsa-miR-34c-5p	242.386	-2.27382	0.792817	-2.86803	0.0041304	0.0167645	672.046	405.608	128.021	159.198	31.6341	57.8072
77	hsa-miR-140-5p	63.998	-2.25661	0.749998	-3.00882	0.00262263	0.0117507	51.7456	74.6554	192.031	15.1064	35.9975	14.4518
112	hsa-miR-29c-3p	14.8357	-2.24925	0.924576	-2.43273	0.0149853	0.0461601	6.4682	23.5135	44.1977	6.97218	5.45416	2.40863
68	hsa-miR-660-5p	62.4581	-2.24222	0.700971	-3.19874	0.00138032	0.00700308	107.372	55.2568	147.834	33.6989	18.5441	12.0432
64	hsa-miR-145-5p	1627.87	-2.21306	0.671578	-3.29531	0.00098314	0.00529974	2370.59	2478.33	3187.57	924.976	613.048	192.691
66	hsa-miR-1291	59.2249	-2.18683	0.676703	-3.2316	0.00123099	0.00643473	132.598	95.8176	63.2484	12.7823	31.6341	19.2691
61	hsa-miR-125b-1-3p	1102.92	-2.17824	0.614799	-3.543	0.000395597	0.00223739	2342.13	1372.6	1706.95	593.797	382.882	219.186
84	hsa-miR-4508	42.144	-2.1656	0.744515	-2.90874	0.00362887	0.0149043	46.571	84.0608	73.9169	10.4583	6.54499	31.3122
55	hsa-miR-708-3p	197.619	-2.16484	0.581893	-3.72034	0.000198954	0.00124798	267.783	362.696	337.579	53.4534	65.4499	98.7539
49	hsa-miR-532-5p	4243.48	-2.14763	0.5562	-3.86125	0.000112809	0.000794265	8708.78	5055.41	7008.38	1784.88	1275.18	1628.24
121	hsa-miR-887-5p	25.0395	-2.14168	0.941541	-2.27465	0.0229268	0.0653697	86.027	31.7433	5.33421	8.13421	14.1808	4.81726
105	hsa-miR-450a-5p	72.0314	-2.13247	0.846691	-2.51859	0.0117826	0.0390148	59.5074	92.8784	201.176	51.1293	25.0891	2.40863
104	hsa-miR-450a-2-3p	23.7123	-2.06704	0.821601	-2.51587	0.0118741	0.0390148	21.3451	27.6284	67.0586	15.1064	8.72666	2.40863
88	hsa-miR-99a-3p	33.7502	-2.05307	0.755332	-2.71811	0.00656562	0.0257402	33.6346	34.0946	95.2537	17.4304	7.63583	14.4518
107	hsa-miR-1247-5p	23.333	-2.04011	0.821203	-2.48429	0.0129809	0.0414669	25.226	64.0744	24.3849	16.2684	7.63583	2.40863
69	hsa-miR-1271-5p	110.563	-1.99485	0.627184	-3.18064	0.00146951	0.00734755	99.6102	188.696	242.325	38.347	53.4508	40.9467
96	hsa-miR-139-3p	28.6638	-1.96464	0.752582	-2.61054	0.00903996	0.0315991	21.3451	44.6757	71.6308	15.1064	11.9992	7.2259
98	hsa-miR-328-3p	4686.23	-1.93448	0.741322	-2.6095	0.00906757	0.0315991	10823.2	9969.73	1494.34	2439.1	1902.41	1488.53
91	hsa-miR-195-3p	759.326	-1.92349	0.715971	-2.68654	0.0072196	0.027371	405.556	1686.51	1514.91	382.308	422.152	144.518
74	hsa-miR-140-3p	2063.61	-1.92137	0.63673	-3.01755	0.00254826	0.01169	1848.61	2846.9	5101.03	660.033	1267.55	657.557
111	hsa-miR-411-5p	113.581	-1.83181	0.751064	-2.43895	0.0147299	0.0457821	92.4952	136.378	304.812	75.5319	57.8141	14.4518
123	hsa-miR-9-5p	59.3737	-1.82221	0.819233	-2.22429	0.026129	0.0737777	21.3451	58.7838	198.128	32.5368	26.18	19.2691
122	hsa-miR-374a-3p	17.27	-1.82094	0.819612	-2.2217	0.0263033	0.0737777	12.9364	32.9189	35.0534	3.48609	11.9992	7.2259
108	hsa-miR-199a-5p	5229.93	-1.79254	0.721314	-2.4851	0.0129514	0.0414669	8633.1	6654.33	9065.1	1875.52	4496.41	655.148
133	hsa-miR-193b-5p	62.067	-1.76942	0.83577	-2.11711	0.0342502	0.0890943	24.5792	61.723	202.7	42.9951	28.3616	12.0432
109	hsa-miR-485-5p	189.947	-1.76787	0.720949	-2.45214	0.014201	0.0449481	356.398	296.27	230.133	153.388	81.8124	21.6777
90	hsa-miR-214-3p	2685.66	-1.76665	0.653641	-2.70279	0.00687608	0.0263583	4061.38	3934.4	4460.16	1175.97	2014.77	467.275
79	hsa-miR-132-3p	246.275	-1.71674	0.583032	-2.94451	0.0032347	0.0136094	448.246	336.243	349.772	109.231	157.08	77.0762
124	hsa-miR-381-3p	1776.56	-1.70522	0.76941	-2.21627	0.0266729	0.0742108	1417.83	1965.14	4776.4	1394.44	891.21	214.368
137	hsa-miR-34c-3p	15.363	-1.70278	0.811765	-2.09762	0.0359385	0.090502	35.5751	17.6351	16.7646	9.29624	3.2725	9.63453
116	hsa-miR-497-5p	54.5104	-1.70007	0.72305	-2.35125	0.0187103	0.0553898	32.341	78.1825	140.213	23.2406	33.8158	19.2691
134	hsa-miR-424-3p	1720.89	-1.69038	0.800535	-2.11157	0.0347234	0.0893999	1195.32	3219.59	3469.52	1698.89	554.143	187.873
99	hsa-miR-532-3p	248.402	-1.65573	0.633558	-2.61338	0.00896526	0.0315991	508.4	420.304	202.7	166.17	79.6308	113.206
87	hsa-miR-502-3p	482.934	-1.63371	0.599899	-2.72331	0.0064632	0.0256299	512.281	634.277	1045.5	323.044	189.805	192.691
118	hsa-miR-432-5p	373.812	-1.60587	0.698244	-2.29987	0.0214558	0.0627308	791.707	354.466	543.327	345.123	116.719	91.528
114	hsa-miR-134-5p	653.04	-1.59357	0.659139	-2.41765	0.0156211	0.0472744	836.985	789.467	1318.31	540.344	293.434	139.701
110	hsa-miR-379-5p	283.44	-1.5905	0.651109	-2.44275	0.0145759	0.0457153	304.005	363.284	611.148	189.411	170.17	62.6244
130	hsa-let-7e-3p	46.6702	-1.49912	0.704846	-2.12688	0.0334299	0.0887178	104.138	71.7162	31.2432	17.4304	33.8158	21.6777
129	hsa-miR-212-5p	41.2254	-1.47663	0.691579	-2.13516	0.0327483	0.0875826	80.8525	67.6014	34.2913	17.4304	32.725	14.4518
144	hsa-miR-374a-5p	42.218	-1.4382	0.729587	-1.97125	0.0486949	0.116665	32.9878	59.3716	92.2056	9.29624	30.5433	28.9036
140	hsa-miR-29b-3p	40.3993	-1.43401	0.708488	-2.02404	0.0429663	0.105881	27.1664	54.0811	96.0157	18.5925	27.2708	19.2691
117	hsa-miR-99a-5p	95290.7	-1.41609	0.602646	-2.34978	0.0187844	0.0553898	110769	134662	170464	41985.3	32890.8	80973.4
138	hsa-miR-125b-5p	20454.9	-1.35068	0.649534	-2.07945	0.0375756	0.093939	33603.6	43261.9	11295.6	14155.8	9426.97	10985.8
142	hsa-miR-139-5p	420.767	-1.34019	0.671817	-1.99487	0.0460568	0.111899	227.034	526.703	1056.17	227.758	250.891	236.046
125	hsa-miR-455-5p	406.163	-1.33953	0.615304	-2.17702	0.0294789	0.0813619	653.288	378.568	716.308	320.72	235.62	132.475
119	hsa-miR-500a-3p	707.701	-1.28889	0.56153	-2.29532	0.0217146	0.0629541	1183.68	783.588	1046.27	534.534	339.249	358.886
128	hsa-miR-342-5p	141.12	-1.22401	0.571281	-2.14258	0.032147	0.0866463	201.808	168.71	221.751	62.7496	90.5391	101.163
139	hsa-let-7c-5p	65260.8	-1.18491	0.578457	-2.0484	0.0405208	0.100573	89380.8	76008.1	106558	32262.6	28784.9	58570.7

## Sheet: Sheet3
list of miRNAs that regulate the level of MUC16 and/or MMP7 and/or MMP9
hsa-miR-1247-3p
hsa-miR-1247-5p
hsa-miR-125b-5p
hsa-miR-129-5p
hsa-miR-132-3p
hsa-miR-134-5p
hsa-miR-135a-3p
hsa-miR-139-3p
hsa-miR-139-5p
hsa-miR-140-5p
hsa-miR-145-5p
hsa-miR-1468-5p
hsa-miR-195-3p
hsa-miR-199a-5p
hsa-miR-204-5p
hsa-miR-212-5p
hsa-miR-214-3p
hsa-miR-29b-3p
hsa-miR-328-3p
hsa-miR-342-5p
hsa-miR-34c-5p
hsa-miR-381-3p
hsa-miR-424-3p
hsa-miR-424-5p
hsa-miR-450a-2-3p
hsa-miR-455-5p
hsa-miR-485-5p
hsa-miR-500a-3p
hsa-miR-532-5p
hsa-miR-887-5p
hsa-miR-99a-3p

## Sheet: Sheet4
ovary: bordeline vs benign
	Gene	baseMean	log2FoldChange	lfcSE	stat	pvalue	padj	s6	s8	s30	s2	s4	s10
1	hsa-miR-449c-5p	1874.72	6.22943	0.855624	7.28057	3.32e-13	1.16e-10	67.3587	64.716	15.6117	3256.4	791.416	7052.81
2	hsa-miR-449a	127.446	5.89089	0.975769	6.03718	1.57e-09	2.73e-07	3.28579	7.19067	2.08156	194.354	37.353	520.413
3	hsa-miR-205-5p	266.221	7.49206	1.38209	5.42081	5.93e-08	6.88e-06	4.92868	0.798963	3.12235	707.947	2.33456	878.198
4	hsa-miR-183-5p	169.304	3.86297	0.777753	4.96683	6.81e-07	5.92e-05	18.8933	24.7679	21.8564	348.9	56.0294	545.375
5	hsa-miR-10a-5p	3559.75	2.22738	0.541509	4.11329	3.9e-05	0.00226939	961.093	1936.69	860.727	4524.77	4104.16	8971.08
6	hsa-miR-31-5p	54.5333	4.71915	1.14749	4.11257	3.91e-05	0.00226939	2.46434	6.39171	3.12235	138.155	2.33456	174.732
8	hsa-miR-200b-3p	4574.55	3.27464	0.813757	4.0241	5.72e-05	0.00283782	941.378	1402.18	226.891	10265.6	2390.59	12220.6
7	hsa-miR-200a-3p	979.275	3.31104	0.829207	3.99302	6.52e-05	0.00283782	216.862	263.658	57.243	1990.37	392.206	2955.31
9	hsa-miR-141-3p	47.315	2.44551	0.627806	3.89532	9.81e-05	0.00358162	14.786	19.1751	10.4078	84.298	32.6838	122.539
10	hsa-miR-182-5p	96.8762	3.52204	0.906899	3.8836	0.00010292	0.00358162	9.03592	15.9793	21.8564	190.451	18.6765	325.258
11	hsa-miR-4508	57.6785	-1.98422	0.523194	-3.79251	0.000149134	0.00471807	59.1442	114.252	100.956	14.8302	32.6838	24.2053
13	hsa-miR-21-3p	45.6613	2.19355	0.590346	3.7157	0.000202639	0.00583377	13.9646	19.1751	16.6525	77.2731	32.6838	114.219
12	hsa-miR-200a-5p	255.672	3.30714	0.894482	3.69727	0.000217928	0.00583377	59.9656	70.3088	10.4078	501.885	95.717	795.748
14	hsa-miR-135b-5p	57.5938	2.84381	0.786357	3.61644	0.000298682	0.00742438	5.75013	15.1803	21.8564	103.811	28.0147	170.95
15	hsa-miR-7704	378.022	-1.88638	0.545837	-3.45593	0.000548396	0.0127228	315.436	709.479	758.73	91.3228	210.11	183.052
16	hsa-miR-200b-5p	115.348	2.98566	0.879173	3.39599	0.000683812	0.0148729	30.3935	43.943	3.12235	286.457	77.0405	251.13
17	hsa-miR-429	39.9462	2.83076	0.8615	3.28584	0.00101677	0.0208139	9.85736	17.5772	2.08156	74.9315	21.011	114.219
18	hsa-miR-200c-3p	5557.61	2.4453	0.762265	3.20794	0.00133691	0.0258469	1973.12	2750.03	449.618	10261.7	3840.35	14070.8
19	hsa-miR-4497	36.4889	-1.55093	0.500504	-3.09875	0.00194342	0.0355953	38.608	48.7368	75.9771	20.294	18.6765	16.6411
20	hsa-miR-505-5p	21.3062	-1.62918	0.543394	-2.99815	0.00271622	0.0472621	32.8579	30.3606	32.2643	6.24429	14.0074	12.1026
21	hsa-miR-23a-3p	3811.58	1.2224	0.415581	2.94143	0.00326697	0.0541384	1461.35	2417.66	2982.88	5921.93	4311.93	5773.71
23	hsa-miR-32-5p	21.545	-1.59143	0.54453	-2.92258	0.00347147	0.0542749	32.8579	22.371	41.6313	10.147	11.6728	10.5898
22	hsa-miR-1247-3p	33.2822	-2.20763	0.758021	-2.91236	0.00358714	0.0542749	16.4289	47.9378	99.9151	9.36644	11.6728	14.3719
24	hsa-miR-95-3p	160.634	1.17403	0.417025	2.81526	0.00487384	0.0706707	84.609	91.0818	121.772	227.917	151.746	286.681
25	hsa-miR-224-5p	200.083	2.19235	0.794247	2.76029	0.00577509	0.0803893	80.5018	75.1025	60.3654	581.5	49.0258	354.002
26	hsa-miR-320d	178.346	-1.31671	0.505225	-2.60618	0.00915574	0.121398	184.004	235.694	342.417	56.1987	130.735	121.026
27	hsa-miR-34c-3p	70.037	1.84453	0.710613	2.59569	0.00944004	0.121398	45.1796	23.9689	22.8972	85.0785	37.353	205.745
28	hsa-miR-378c	103.105	1.18613	0.459037	2.58395	0.00976769	0.121398	41.8938	63.9171	84.3034	166.254	100.386	161.873
29	hsa-miR-10b-3p	144.902	-0.772801	0.302651	-2.55344	0.0106665	0.127998	188.933	166.983	192.545	106.153	107.39	107.411
30	hsa-miR-542-3p	32.8576	-1.63144	0.645489	-2.52744	0.0114897	0.133281	31.215	34.3554	82.2218	9.36644	23.3456	16.6411
35	hsa-miR-3687	71.7441	1.30286	0.520334	2.5039	0.0122834	0.134776	31.215	52.7316	39.5497	124.105	128.401	54.4619
31	hsa-miR-1291	93.6833	-1.1459	0.460376	-2.48906	0.0128081	0.134776	168.397	130.231	86.3849	55.4181	77.0405	44.6285
34	hsa-miR-25-5p	70.1205	-1.0314	0.415247	-2.48383	0.0129979	0.134776	98.5736	104.664	78.0587	32.7825	53.6949	52.949
32	hsa-miR-202-3p	644.009	-0.91924	0.372286	-2.46917	0.0135425	0.134776	705.623	686.309	1136.53	497.202	415.552	422.836
33	hsa-miR-21-5p	16179.8	1.72638	0.702085	2.45894	0.0139349	0.134776	9495.11	6618.61	6416.42	22430.3	6422.38	45695.8
36	hsa-miR-483-5p	33.2378	-3.03076	1.23265	-2.45875	0.0139423	0.134776	8.21447	17.5772	152.995	7.02483	0	13.6155
37	hsa-miR-23b-3p	7875.21	1.06856	0.448235	2.38393	0.017129	0.157282	3332.61	5186.07	6738.03	14030.9	7797.43	10166.2
38	hsa-miR-4683	6.44579	2.53213	1.0626	2.38295	0.0171745	0.157282	0.821447	4.79378	0	10.9275	7.00368	15.1283
39	hsa-miR-10a-3p	25.6743	2.05028	0.87103	2.35386	0.0185795	0.163714	3.28579	13.5824	13.5302	21.0745	16.3419	86.2313
40	hsa-miR-204-3p	90.4173	-2.24418	0.956994	-2.34503	0.0190253	0.163714	15.6075	98.2725	334.091	18.7329	32.6838	43.1156
41	hsa-miR-330-3p	87.2277	-1.23702	0.528662	-2.33991	0.0192881	0.163714	193.861	106.262	66.6101	46.8322	58.364	51.4362
42	hsa-miR-342-5p	202.81	-0.888291	0.386651	-2.2974	0.0215962	0.17894	256.291	229.302	302.868	99.1282	170.423	158.847
43	hsa-miR-877-5p	42.0634	-1.27593	0.56436	-2.26085	0.0237687	0.192361	79.6804	62.3191	37.4682	17.1718	18.6765	37.0643
45	hsa-miR-378a-3p	3571.39	1.01097	0.454963	2.2221	0.0262766	0.206012	1603.46	2654.95	2849.66	5163.25	3023.26	6133.77
44	hsa-miR-30b-3p	60.5599	-1.22951	0.554642	-2.21676	0.0266395	0.206012	61.6085	93.4787	100.956	22.6356	25.6802	59.0004
46	hsa-miR-1275	20.7778	-1.37513	0.649611	-2.11685	0.0342722	0.259277	34.5008	40.7471	14.571	15.6107	11.6728	7.56415
48	hsa-miR-187-3p	40.9027	1.70581	0.818321	2.08452	0.0371129	0.268697	41.0723	6.39171	10.4078	71.0288	28.0147	88.5005
49	hsa-miR-30c-1-3p	68.2189	-0.811772	0.390838	-2.077	0.0378013	0.268697	98.5736	75.9015	85.3442	38.2463	56.0294	55.2183
47	hsa-miR-145-5p	4902.73	0.799866	0.385171	2.07665	0.0378337	0.268697	3010.6	3368.43	4353.59	8041.87	6079.2	4562.69
50	hsa-miR-378d	44.3191	1.14859	0.560145	2.05052	0.0403134	0.280581	13.1432	35.9533	34.3458	65.5651	42.0221	74.8851
51	hsa-miR-320c	525.776	-1.32988	0.654061	-2.03327	0.0420249	0.286758	420.581	615.202	1220.84	119.422	333.842	444.772
52	hsa-miR-511-5p	51.6047	1.31695	0.65403	2.01358	0.0440532	0.294818	23.822	29.5616	36.4274	93.6644	21.011	105.142
53	hsa-miR-185-3p	31.0333	1.15789	0.58572	1.97687	0.0480562	0.313357	9.03592	19.1751	30.1827	42.9295	32.6838	52.1926
54	hsa-miR-320e	20.1261	-1.17513	0.596533	-1.96994	0.0488456	0.313357	18.0718	23.1699	41.6313	11.7081	16.3419	9.83339
56	hsa-miR-34c-5p	961.923	1.40836	0.718385	1.96045	0.0499432	0.313357	853.483	551.285	174.851	1032.65	747.059	2412.21
55	hsa-miR-326	32.4391	1.31478	0.67206	1.95634	0.0504252	0.313357	15.6075	31.1596	8.32626	54.6376	60.6986	24.2053
58	hsa-miR-378a-5p	41.5002	1.14911	0.605463	1.8979	0.0577092	0.343785	11.5003	30.3606	36.4274	58.5403	35.0184	77.1543
60	hsa-miR-92a-1-5p	74.4479	-0.833571	0.439343	-1.89731	0.0577864	0.343785	73.9302	118.247	93.6704	38.2463	56.0294	66.5645
59	hsa-miR-760	118.272	-1.11413	0.589318	-1.89055	0.0586849	0.343785	96.1093	124.638	264.359	42.149	84.0442	98.3339
57	hsa-miR-135a-3p	128.115	-1.42861	0.757419	-1.88616	0.0592733	0.343785	250.541	231.699	75.9771	63.2235	126.066	21.1796
62	hsa-miR-335-3p	64.5401	0.769332	0.413463	1.8607	0.062786	0.355441	46.8225	47.9378	49.9576	88.9812	53.6949	99.8467
63	hsa-miR-509-3-5p	8972.41	1.82523	0.983629	1.85561	0.0635093	0.355441	6515.72	1701.79	3631.29	16587.2	957.17	24441.3
61	hsa-miR-320b	1555.03	-1.20757	0.652822	-1.84977	0.064347	0.355441	1150.03	1718.57	3642.74	433.198	889.468	1496.19
65	hsa-miR-101-3p	1756.07	-0.883157	0.48019	-1.83918	0.0658885	0.357753	1265.03	2962.56	2603	910.106	1568.82	1226.9
64	hsa-let-7e-5p	9876.21	-0.899587	0.490808	-1.83287	0.0668218	0.357753	16644.2	10346.6	11587	3752.04	7125.08	9802.38
67	hsa-miR-362-5p	58.6603	-0.720425	0.396704	-1.81603	0.0693665	0.363767	75.5731	63.1181	82.2218	49.9544	32.6838	48.4105
66	hsa-miR-320a	20403.6	-1.27023	0.701132	-1.81168	0.0700357	0.363767	14214.3	22259.9	50067.9	4816.69	10988.8	20073.7
69	hsa-miR-6087	12.0156	-1.62419	0.913382	-1.77822	0.0753683	0.382858	11.5003	16.7782	27.0603	1.56107	2.33456	12.8591
68	hsa-miR-34b-3p	93.5392	1.2592	0.709444	1.77492	0.0759116	0.382858	90.3592	61.5202	13.5302	116.3	95.717	183.809
70	hsa-miR-223-3p	18.5079	1.51919	0.887835	1.71112	0.0870585	0.42971	1.64289	7.98963	19.7749	36.6852	11.6728	33.2822
71	hsa-miR-675-5p	3.31029	1.8814	1.10164	1.70781	0.0876707	0.42971	1.64289	0.798963	2.08156	4.68322	2.33456	8.32056
72	hsa-miR-150-5p	306.488	0.826804	0.492063	1.68028	0.0929026	0.443858	121.574	242.885	299.745	436.32	275.478	462.926
73	hsa-miR-190b	20.3811	1.31051	0.780428	1.67923	0.0931081	0.443858	16.4289	11.1855	7.28548	7.80537	32.6838	46.8977
74	hsa-miR-5701	19.2098	-1.11531	0.6747	-1.65304	0.0983229	0.462383	15.6075	16.7782	45.7944	10.147	16.3419	10.5898
76	hsa-miR-99a-3p	54.8288	-1.01603	0.619144	-1.64103	0.100791	0.464912	42.7152	46.3399	130.098	33.5631	49.0258	27.2309
75	hsa-miR-195-5p	324.296	-1.47032	0.897924	-1.63747	0.101533	0.464912	50.1083	409.868	970.009	118.642	163.419	233.732
78	hsa-miR-192-5p	378.589	-0.642845	0.398845	-1.61177	0.107013	0.468643	377.866	476.182	527.677	250.552	408.548	230.707
79	hsa-miR-27b-5p	51.643	0.83094	0.515976	1.61042	0.107305	0.468643	25.4649	48.7368	38.5089	79.6148	37.353	80.18
77	hsa-miR-125a-3p	227.737	-0.851364	0.528872	-1.60977	0.107448	0.468643	220.969	263.658	395.497	95.2255	135.405	255.668
80	hsa-miR-375	61.3139	1.21367	0.754556	1.60846	0.107734	0.468643	52.5726	51.9326	6.24469	108.495	67.7023	80.9364
81	hsa-miR-378g	13.2764	1.07235	0.699654	1.53268	0.125355	0.538562	4.92868	11.1855	10.4078	24.1966	7.00368	21.936
82	hsa-miR-4443	28.2423	-1.00696	0.668927	-1.50533	0.132239	0.561207	35.3222	42.3451	37.4682	15.6107	4.66912	34.0387
83	hsa-let-7c-5p	103079	-0.500623	0.340906	-1.46851	0.141967	0.593852	113512	103307	145537	73403.2	104469	78244.3
95	hsa-miR-99a-5p	151709	-0.653802	0.453963	-1.44021	0.149808	0.593852	140674	183027	232821	107794	168859	77077.2
92	hsa-miR-450b-5p	51.2572	-0.929607	0.646745	-1.43736	0.150615	0.593852	33.6793	47.9378	119.69	21.855	42.0221	42.3592
89	hsa-miR-29b-2-5p	18.4329	-0.805687	0.560575	-1.43725	0.150646	0.593852	32.0364	18.3762	20.8156	17.1718	9.33824	12.8591
84	hsa-miR-1246	39.7483	-1.12674	0.790028	-1.4262	0.153809	0.593852	27.9292	34.3554	101.997	10.147	18.6765	45.3849
93	hsa-miR-455-5p	623.083	-0.717654	0.503311	-1.42587	0.153907	0.593852	829.661	514.532	978.335	454.272	686.361	275.335
85	hsa-miR-125b-1-3p	2036.46	-0.507289	0.356667	-1.4223	0.154938	0.593852	2974.46	1865.58	2331.35	1372.96	1883.99	1790.43
91	hsa-miR-324-5p	44.1532	0.869946	0.61218	1.42106	0.155299	0.593852	51.7512	25.5668	16.6525	84.298	42.0221	44.6285
90	hsa-miR-30e-5p	375.253	-0.571477	0.404892	-1.41143	0.158117	0.593852	313.793	415.461	616.143	260.699	331.508	313.912
86	hsa-miR-1301-3p	417.874	-0.777704	0.553105	-1.40607	0.159704	0.593852	902.77	385.1	294.541	236.503	378.199	310.13
87	hsa-miR-148a-3p	68237.3	-0.615767	0.438109	-1.40551	0.15987	0.593852	68185	55514.4	124049	47874.2	55604.6	58197
94	hsa-miR-660-5p	110.519	-0.713934	0.50955	-1.40111	0.161182	0.593852	136.36	75.1025	201.912	93.6644	63.0331	93.039
88	hsa-miR-24-2-5p	58.7689	0.709453	0.507479	1.39799	0.162115	0.593852	39.4295	34.3554	61.4062	66.3456	46.6912	104.385
96	hsa-miR-1260b	24.4848	-0.920357	0.662453	-1.38932	0.164737	0.597171	31.215	42.3451	22.8972	28.8799	14.0074	7.56415
100	hsa-miR-193b-5p	93.3741	-1.20811	0.878588	-1.37506	0.169112	0.601889	31.215	83.8911	276.848	31.2215	32.6838	104.385
101	hsa-miR-339-5p	54.7298	0.747501	0.545439	1.37046	0.170544	0.601889	25.4649	29.5616	67.6509	75.7121	77.0405	52.949
99	hsa-miR-15b-5p	160.012	0.592563	0.433813	1.36594	0.171958	0.601889	87.8948	127.834	168.607	219.331	140.074	216.335
102	hsa-miR-744-5p	2227.76	-0.428942	0.315348	-1.36022	0.173762	0.601889	2850.42	2716.48	2101.34	1612.59	2066.09	2019.63
97	hsa-miR-125b-2-3p	2357.53	-0.564278	0.416	-1.35644	0.17496	0.601889	2606.45	3300.52	2528.06	1615.71	2729.1	1365.33
98	hsa-miR-1343-3p	20.0077	-1.46172	1.08125	-1.35187	0.176416	0.601889	41.8938	42.3451	3.12235	14.8302	16.3419	1.51283
104	hsa-miR-615-3p	1602.24	-1.48268	1.10328	-1.34388	0.178986	0.602438	3887.09	2987.32	203.993	554.181	1858.31	122.539
103	hsa-miR-20a-5p	81.9432	-0.476949	0.355763	-1.34063	0.180039	0.602438	96.9307	99.0714	91.5889	66.3456	56.0294	81.6928
105	hsa-miR-450a-5p	125.061	-0.808688	0.623629	-1.29675	0.194719	0.645353	75.5731	126.236	274.767	56.1987	126.066	91.5262
106	hsa-miR-135a-5p	35.2626	0.674805	0.526873	1.28077	0.200274	0.6538	20.5362	39.1492	20.8156	29.6604	56.0294	45.3849
109	hsa-miR-6842-3p	13.8296	0.861219	0.67702	1.27207	0.203347	0.6538	9.03592	3.99482	16.6525	18.7329	18.6765	15.8847
107	hsa-miR-425-5p	94.8558	0.580751	0.456859	1.27118	0.203664	0.6538	72.2873	63.9171	93.6704	122.544	67.7023	149.014
108	hsa-miR-652-3p	246.113	0.442359	0.348851	1.26804	0.204782	0.6538	163.468	228.503	233.135	288.799	324.504	238.271
110	hsa-miR-374a-5p	67.2211	-0.679199	0.540532	-1.25654	0.208921	0.655122	41.8938	80.6953	125.935	42.9295	51.3603	60.5132
111	hsa-miR-625-5p	52.6579	0.505489	0.402323	1.25643	0.208961	0.655122	41.8938	42.3451	44.7536	52.296	81.7096	52.949
112	hsa-miR-204-5p	381.821	-0.813378	0.655961	-1.23998	0.214983	0.667984	163.468	757.417	538.085	295.043	373.53	163.386
113	hsa-miR-1180-3p	1792.28	-0.70637	0.576335	-1.22562	0.22034	0.67857	3585.62	1993.41	1086.58	929.619	1935.35	1223.12
114	hsa-miR-148b-3p	4851.96	0.505697	0.416797	1.21329	0.225017	0.68329	5811.74	3095.98	3123.39	6552.61	4902.58	5625.46
115	hsa-miR-374a-3p	29.3639	-0.701204	0.57891	-1.21125	0.2258	0.68329	16.4289	44.7419	47.876	21.855	23.3456	21.936
116	hsa-miR-146a-5p	404.974	0.702261	0.598385	1.17359	0.240558	0.721674	192.219	178.169	555.778	580.719	329.173	593.786
117	hsa-miR-532-5p	8047.08	-0.404538	0.347338	-1.16468	0.244147	0.726182	11060	6871.08	9572.08	7361.24	7491.6	5926.51
118	hsa-miR-502-3p	834.546	-0.509603	0.439606	-1.15923	0.246364	0.726566	650.586	862.081	1427.95	709.508	789.081	568.067
119	hsa-miR-708-5p	277.259	-0.452382	0.392006	-1.15402	0.248493	0.726686	267.792	345.951	344.499	184.207	322.169	198.937
120	hsa-miR-505-3p	526.685	0.711916	0.624849	1.13934	0.254561	0.738226	386.08	560.872	249.788	764.146	957.17	242.053
122	hsa-miR-195-3p	1308.28	-0.714301	0.632907	-1.1286	0.259065	0.74367	515.047	2292.23	2069.08	690.775	1232.65	1049.9
121	hsa-miR-140-5p	115.433	-0.701531	0.62437	-1.12358	0.26119	0.74367	65.7158	101.468	262.277	71.8094	79.3751	111.949
124	hsa-miR-625-3p	54.5819	0.450807	0.404182	1.11535	0.264698	0.74367	42.7152	47.1388	46.8352	52.296	84.0442	54.4619
123	hsa-miR-199b-5p	479.81	0.800525	0.718163	1.11468	0.264986	0.74367	598.013	140.618	312.235	507.349	268.474	1052.17
126	hsa-miR-29c-3p	26.0061	-0.840705	0.759791	-1.1065	0.268512	0.747002	8.21447	31.9585	60.3654	18.7329	16.3419	20.4232
125	hsa-miR-194-5p	37.7292	-0.460975	0.418311	-1.10199	0.270466	0.747002	42.7152	35.9533	52.0391	28.8799	35.0184	31.7694
127	hsa-miR-340-5p	68.7262	-0.562765	0.516531	-1.08951	0.275929	0.75609	63.2514	59.1233	122.812	36.6852	67.7023	62.7824
128	hsa-miR-1468-5p	176.196	-0.83539	0.783414	-1.06635	0.286268	0.77829	324.472	258.065	92.6296	90.5423	252.133	39.3336
130	hsa-miR-7706	122.05	-0.603411	0.571928	-1.05505	0.291404	0.784177	225.898	156.597	59.3246	93.6644	86.3787	110.437
129	hsa-miR-30a-5p	3481.57	0.348944	0.331792	1.05169	0.29294	0.784177	3514.97	2565.47	3108.82	3805.9	3228.7	4665.57
131	hsa-miR-508-3p	2056.93	1.00999	0.973823	1.03714	0.299669	0.796067	2420.8	639.171	1035.58	3620.91	203.107	4422
132	hsa-miR-509-3p	4353.18	1.06611	1.0364	1.02866	0.303639	0.800502	5376.37	1064.22	2002.47	6383.23	361.857	10930.9
133	hsa-miR-708-3p	374.477	-0.449581	0.440296	-1.02109	0.307213	0.803835	340.079	492.96	461.067	252.113	466.912	233.732
134	hsa-miR-100-5p	28336.9	-0.493467	0.486109	-1.01514	0.31004	0.80518	37847.3	32817.4	28741.2	18123.3	37789.5	14702.4
135	hsa-miR-494-3p	88.3581	0.675478	0.68203	0.990394	0.321982	0.829997	64.8943	21.572	118.649	127.228	67.7023	130.103
136	hsa-miR-6511b-3p	45.1098	-0.933171	0.954081	-0.978084	0.328033	0.834311	79.6804	91.8808	5.20391	34.3436	46.6912	12.8591
137	hsa-miR-6747-3p	27.7125	-0.71407	0.7307	-0.977241	0.32845	0.834311	56.6798	32.7575	12.4894	21.0745	32.6838	10.5898
140	hsa-miR-506-3p	868.062	1.12285	1.16964	0.959996	0.337057	0.844144	1238.74	168.581	232.094	1414.33	39.6875	2114.94
138	hsa-miR-450a-2-3p	42.5496	-0.70183	0.731493	-0.959449	0.337332	0.844144	27.1078	37.5513	91.5889	17.1718	60.6986	21.1796
139	hsa-miR-500a-3p	1209.16	-0.295295	0.309222	-0.954959	0.339598	0.844144	1503.25	1065.02	1428.99	1141.93	1111.25	1004.52
142	hsa-miR-106b-5p	16.146	-0.530454	0.56239	-0.943214	0.345571	0.847421	26.2863	13.5824	17.6933	13.2691	11.6728	14.3719
144	hsa-miR-132-5p	111.854	-0.389137	0.421435	-0.923362	0.355818	0.847421	129.789	143.014	107.201	124.105	102.721	64.2953
141	hsa-let-7a-3p	37.187	-0.451242	0.488889	-0.922995	0.35601	0.847421	32.8579	43.144	54.1207	26.5383	23.3456	43.1156
147	hsa-miR-99b-3p	1986.69	-0.463369	0.502355	-0.922392	0.356324	0.847421	3543.72	2124.44	1239.57	1373.74	2038.07	1600.57
143	hsa-miR-1226-3p	17.9831	-0.779725	0.846541	-0.921072	0.357013	0.847421	43.5367	19.9741	4.16313	14.0497	16.3419	9.83339
146	hsa-miR-424-5p	73.0831	-0.883218	0.959995	-0.920024	0.35756	0.847421	12.3217	74.3036	196.708	18.7329	91.0479	45.3849
145	hsa-miR-3928-3p	17.1433	-0.7063	0.768339	-0.919255	0.357962	0.847421	8.21447	26.3658	29.1419	5.46376	14.0074	19.6668
150	hsa-miR-887-5p	41.9783	-0.816675	0.901547	-0.90586	0.36501	0.85262	109.252	43.144	7.28548	28.0993	46.6912	17.3975
148	hsa-miR-30c-5p	4055.58	-0.247362	0.273765	-0.903558	0.36623	0.85262	4545.89	4015.59	4643.97	3517.88	4157.85	3452.28
149	hsa-miR-495-3p	221.047	-0.451555	0.501088	-0.90115	0.367509	0.85262	266.149	139.819	361.151	157.668	156.416	245.078
151	hsa-miR-296-3p	41.1319	-0.625323	0.700393	-0.892818	0.371955	0.85722	42.7152	50.3347	58.2838	18.7329	11.6728	65.0517
160	hsa-miR-629-5p	241.021	-0.705741	0.805238	-0.876439	0.380792	0.858378	52.5726	364.327	478.76	95.2255	266.14	189.104
152	hsa-miR-1-3p	147.479	-0.997276	1.13836	-0.876064	0.380995	0.858378	16.4289	43.144	530.799	96.7866	37.353	160.36
155	hsa-miR-193a-5p	1200.5	-0.533912	0.611173	-0.873586	0.382344	0.858378	611.978	1813.65	1832.82	703.264	1568.82	672.453
153	hsa-miR-149-5p	563.587	-0.404368	0.469022	-0.862151	0.388604	0.858378	805.018	688.706	430.884	558.084	602.317	296.515
157	hsa-miR-433-3p	760.731	-0.498123	0.578557	-0.860974	0.389252	0.858378	1456.43	763.809	450.659	668.92	835.773	388.797
156	hsa-miR-19b-3p	22.0598	-0.539578	0.628392	-0.858664	0.390526	0.858378	13.1432	24.7679	40.5905	12.4886	18.6765	22.6924
154	hsa-miR-155-5p	839.03	0.266235	0.310396	0.857729	0.391042	0.858378	774.625	752.623	756.649	725.899	1062.22	962.16
161	hsa-miR-92b-5p	240.869	0.562947	0.662756	0.849404	0.395657	0.858378	174.968	211.725	197.749	143.619	137.739	579.414
159	hsa-miR-508-5p	438.063	0.819889	0.966603	0.848217	0.396317	0.858378	650.586	148.607	151.954	883.568	60.6986	732.966
158	hsa-miR-497-5p	95.6492	-0.524566	0.61949	-0.84677	0.397123	0.858378	41.0723	106.262	191.504	71.0288	77.0405	86.9877
172	hsa-miR-30e-3p	1409.33	-0.249924	0.300801	-0.830861	0.406052	0.865644	1530.36	1601.12	1459.18	1223.88	1543.14	1098.31
165	hsa-miR-132-3p	562.494	0.31403	0.382768	0.820419	0.411977	0.865644	569.263	457.007	477.719	775.854	670.019	425.105
180	hsa-miR-424-3p	2912.4	-0.636858	0.77978	-0.816714	0.414092	0.865644	1518.03	4375.92	4738.68	862.493	4778.85	1200.43
174	hsa-miR-331-5p	66.0292	-0.339714	0.41667	-0.815308	0.414896	0.865644	54.2155	68.7108	98.8743	60.1013	56.0294	58.2439
171	hsa-miR-27a-5p	89.8519	0.303674	0.373351	0.813374	0.416004	0.865644	75.5731	79.0974	87.4257	82.7369	88.7133	125.565
176	hsa-miR-363-3p	79.5805	-0.506139	0.630062	-0.803317	0.421792	0.865644	44.3581	74.3036	160.28	45.2711	98.0515	55.2183
164	hsa-miR-1287-5p	58.0394	0.332917	0.415073	0.802068	0.422513	0.865644	67.3587	47.1388	39.5497	58.5403	63.0331	72.6158
177	hsa-miR-381-3p	3166.92	-0.457677	0.571928	-0.800235	0.423575	0.865644	1800.61	2670.93	6523.62	2215.94	2948.55	2841.85
179	hsa-miR-423-3p	155.79	-0.458145	0.57456	-0.797384	0.425228	0.865644	220.148	222.911	95.752	122.544	200.772	72.6158
163	hsa-miR-128-3p	1003.64	-0.496234	0.625518	-0.793316	0.427593	0.865644	1812.11	1212.83	497.494	963.182	1106.58	429.644
166	hsa-miR-136-3p	42.128	-0.346729	0.440198	-0.787667	0.430891	0.865644	34.5008	44.7419	62.4469	35.9047	37.353	37.8207
168	hsa-miR-210-3p	89.1234	0.382455	0.488285	0.783262	0.433473	0.865644	84.609	56.7264	92.6296	111.617	56.0294	133.129
162	hsa-miR-1247-5p	41.7286	-0.686397	0.886871	-0.773953	0.438958	0.865644	32.0364	87.087	33.305	21.855	70.0368	6.05132
181	hsa-miR-543	1060.9	-0.639386	0.826557	-0.773553	0.439195	0.865644	2581.81	965.947	327.846	959.28	1227.98	302.566
169	hsa-miR-2110	353.974	-0.394226	0.513975	-0.767014	0.443073	0.865644	248.077	443.425	514.147	171.718	347.849	398.631
175	hsa-miR-361-3p	2322.95	0.311775	0.40728	0.765506	0.443971	0.865644	1462.18	2962.56	1793.27	2524.26	2824.82	2370.6
178	hsa-miR-409-5p	56.8573	0.445562	0.587667	0.758188	0.448338	0.865644	73.9302	24.7679	46.8352	78.8342	37.353	79.4236
173	hsa-miR-329-3p	89.6267	0.425959	0.562052	0.757864	0.448532	0.865644	128.146	48.7368	52.0391	121.764	116.728	70.3466
170	hsa-miR-221-5p	202.717	0.337927	0.44669	0.756514	0.449341	0.865644	225.898	173.375	139.465	303.629	144.743	229.194
167	hsa-miR-139-3p	53.0196	-0.462316	0.612319	-0.755024	0.450234	0.865644	27.1078	60.7212	97.8335	50.7349	28.0147	53.7054
183	hsa-miR-212-5p	72.157	-0.346977	0.463196	-0.749092	0.453801	0.867382	102.681	91.8808	46.8352	62.4429	72.3714	56.7311
182	hsa-miR-10b-5p	45825.4	-0.34814	0.468851	-0.742539	0.457761	0.867382	59079.3	59280.7	35622.9	52032.1	45376.9	23560.8
184	hsa-miR-328-3p	7957.07	-0.672757	0.907748	-0.741128	0.458616	0.867382	13745.3	13550.4	2040.97	4946.26	12025.3	1434.16
185	hsa-miR-151b	17.9397	-0.441552	0.600698	-0.735064	0.4623	0.869624	19.7147	27.1648	13.5302	14.0497	23.3456	9.83339
186	hsa-miR-411-5p	208.971	-0.421677	0.581849	-0.724718	0.468625	0.876782	117.467	185.359	416.313	196.695	130.735	207.258
187	hsa-miR-150-3p	7.64713	0.686301	0.954297	0.719169	0.472037	0.878443	5.75013	6.39171	6.24469	8.5859	0	18.9104
188	hsa-miR-935	4.56133	0.845527	1.18636	0.71271	0.476026	0.881154	6.57158	3.19585	0	2.34161	4.66912	10.5898
191	hsa-miR-26b-5p	5804.09	-0.252892	0.361663	-0.699248	0.484397	0.885836	5043.68	6610.62	7278.19	5215.55	6560.11	4116.41
194	hsa-miR-361-5p	379.237	0.243843	0.357571	0.681942	0.495276	0.885836	288.328	364.327	387.171	344.217	525.276	366.105
193	hsa-miR-324-3p	72.7694	0.243952	0.358642	0.68021	0.496372	0.885836	76.3946	59.1233	64.5285	71.0288	77.0405	88.5005
192	hsa-miR-27b-3p	16919.1	0.363969	0.536765	0.678079	0.497722	0.885836	7136.73	15500.7	21752.4	22844	12954.5	21326.4
198	hsa-miR-598-3p	7.85826	0.594426	0.884326	0.67218	0.501469	0.885836	9.85736	2.39689	7.28548	10.147	2.33456	15.1283
199	hsa-miR-664b-5p	17.3314	-0.484244	0.722526	-0.670209	0.502724	0.885836	18.8933	15.1803	27.0603	5.46376	11.6728	25.7181
197	hsa-miR-5010-3p	25.3971	-0.618446	0.924716	-0.668796	0.503626	0.885836	52.5726	34.3554	4.16313	17.9523	35.0184	8.32056
195	hsa-miR-3909	64.8992	0.315531	0.47277	0.66741	0.504511	0.885836	39.4295	77.4994	55.1615	67.1262	95.717	54.4619
196	hsa-miR-501-3p	496.777	-0.374981	0.563258	-0.665736	0.50558	0.885836	888.806	512.135	281.011	508.129	518.272	272.309
190	hsa-miR-22-3p	1011.52	0.382493	0.574897	0.665324	0.505843	0.885836	506.833	660.743	1468.54	1166.12	700.368	1566.53
200	hsa-miR-671-3p	190.32	-0.492368	0.744783	-0.661089	0.508555	0.885836	357.329	254.07	55.1615	189.67	207.776	77.9107
189	hsa-miR-1296-5p	99.6091	0.217493	0.329416	0.660238	0.509101	0.885836	90.3592	86.288	98.8743	109.275	119.063	93.7954
211	hsa-miR-485-5p	362.23	-0.226721	0.350049	-0.647682	0.51719	0.88915	452.617	402.677	314.316	291.14	408.548	304.079
206	hsa-miR-17-5p	82.1343	0.258411	0.399203	0.647316	0.517427	0.88915	89.5377	75.1025	60.3654	78.0537	77.0405	112.706
209	hsa-miR-340-3p	14.1477	-0.404162	0.634322	-0.637156	0.524023	0.88915	22.1791	15.1803	11.4486	8.5859	9.33824	18.154
212	hsa-miR-487b-3p	104.2	0.338715	0.533829	0.6345	0.525754	0.88915	138.003	62.3191	77.0179	156.107	67.7023	124.052
201	hsa-let-7b-3p	658.174	0.384301	0.616079	0.623785	0.532769	0.88915	472.332	790.974	448.577	908.545	1066.89	261.72
207	hsa-miR-181a-5p	10044.7	0.211567	0.340423	0.621482	0.534283	0.88915	10277.1	10474.4	7175.15	10600.5	12545.9	9194.98
214	hsa-miR-7-5p	122.581	0.310492	0.502741	0.617598	0.53684	0.88915	116.645	123.839	89.5073	134.252	70.0368	201.206
210	hsa-miR-452-5p	11.4946	0.428594	0.697136	0.614793	0.538692	0.88915	8.21447	12.7834	9.36704	21.0745	4.66912	12.8591
213	hsa-miR-584-5p	14.8817	0.329841	0.539412	0.611483	0.54088	0.88915	13.1432	13.5824	12.4894	12.4886	18.6765	18.9104
208	hsa-miR-29b-3p	70.9868	-0.351752	0.57816	-0.6084	0.542922	0.88915	34.5008	73.5046	131.139	65.5651	60.6986	60.5132
202	hsa-let-7b-5p	234889	-0.342971	0.565737	-0.606237	0.544358	0.88915	111442	304690	371903	138068	247552	235679
205	hsa-miR-152-3p	1866.53	0.228443	0.378278	0.603903	0.545908	0.88915	2277.87	1310.3	1569.5	1797.58	1853.64	2390.27
203	hsa-miR-1271-5p	212.777	-0.350364	0.581945	-0.602056	0.547137	0.88915	126.503	256.467	330.969	189.67	275.478	97.5775
204	hsa-miR-143-5p	330.028	0.298246	0.497684	0.599268	0.548994	0.88915	289.149	185.359	415.272	362.169	235.791	492.426
215	hsa-miR-93-5p	349.091	0.320928	0.535985	0.598762	0.549331	0.88915	494.511	274.044	163.403	459.736	275.478	427.374
216	hsa-miR-451a	567.83	-0.53663	0.932458	-0.5755	0.564953	0.910203	91.1806	355.539	1570.54	296.604	354.853	738.261
217	hsa-miR-140-3p	3988.2	-0.29506	0.518359	-0.56922	0.569207	0.91283	2347.7	3869.38	6967	2756.08	3669.93	4319.13
218	hsa-miR-455-3p	642.561	-0.275397	0.490261	-0.561734	0.574297	0.915193	835.412	573.656	699.406	522.96	894.137	329.797
219	hsa-miR-92a-3p	42887.9	-0.50378	0.900694	-0.559325	0.57594	0.915193	51954.9	86583.6	12362.4	24462	72999.4	8965.03
221	hsa-miR-24-3p	1508.14	0.278005	0.503917	0.551688	0.581162	0.915894	861.698	1161.69	2068.03	1644.59	1125.26	2187.55
220	hsa-miR-199a-5p	11437.2	0.161902	0.293842	0.550983	0.581645	0.915894	10963.9	9044.26	12381.1	11775.2	11406.7	13051.9
222	hsa-miR-335-5p	13.5855	0.349317	0.640859	0.545076	0.585701	0.918126	9.85736	15.9793	10.4078	10.147	11.6728	23.4489
223	hsa-miR-26a-5p	94353.2	-0.217163	0.408053	-0.532194	0.594592	0.927883	72714.5	108932	122675	84508.7	112428	64861.1
225	hsa-miR-184	68.2995	-0.552649	1.0617	-0.520532	0.602693	0.932804	198.79	10.3865	34.3458	14.0497	60.6986	91.5262
227	hsa-miR-379-5p	617.832	0.217257	0.421039	0.516003	0.605852	0.932804	386.08	493.759	834.707	663.456	674.688	654.299
224	hsa-miR-126-3p	4677.18	0.361793	0.706251	0.512273	0.60846	0.932804	1954.22	2590.24	7738.22	5014.17	2467.63	8298.63
228	hsa-miR-532-3p	449.353	-0.316253	0.619864	-0.510197	0.609913	0.932804	645.657	571.259	276.848	480.811	564.964	156.578
226	hsa-miR-30c-2-3p	312.075	0.196784	0.387037	0.508437	0.611147	0.932804	394.295	270.849	207.116	320.801	329.173	350.22
232	hsa-miR-504-5p	446.558	0.241851	0.489736	0.493838	0.62142	0.934723	237.398	548.888	440.251	510.471	616.324	326.015
231	hsa-miR-493-3p	1045.68	-0.199073	0.404214	-0.492494	0.62237	0.934723	1267.49	776.592	1309.3	746.193	966.508	1207.99
233	hsa-miR-574-3p	4371.91	-0.286614	0.582344	-0.492172	0.622598	0.934723	4893.36	6953.38	2565.53	3762.97	5962.47	2093.76
229	hsa-miR-185-5p	93.441	0.285396	0.584835	0.487995	0.625553	0.934723	52.5726	66.314	135.302	97.5671	58.364	150.527
230	hsa-miR-454-3p	9.31078	-0.343884	0.705262	-0.487598	0.625835	0.934723	15.6075	7.98963	8.32626	11.7081	4.66912	7.56415
234	hsa-let-7i-5p	86811.2	0.14408	0.306061	0.470756	0.637815	0.948545	95236.9	80684.1	71519.4	84549.3	83339.1	105538
237	hsa-miR-145-3p	785.152	-0.268369	0.583338	-0.460058	0.645475	0.954408	412.366	607.212	1554.93	659.554	660.681	816.172
236	hsa-miR-143-3p	45926.1	-0.243266	0.532729	-0.456641	0.647929	0.954408	33485.5	35091.3	80791.8	38688.9	29609.2	57889.9
235	hsa-miR-125b-5p	34634.6	-0.362929	0.799785	-0.453784	0.649985	0.954408	42675.8	58799.7	15427.5	27873	55683.9	7347.81
238	hsa-miR-941	1665.29	-0.223424	0.51093	-0.437289	0.661902	0.967823	1940.26	2248.28	1190.66	1063.87	2418.6	1130.08
239	hsa-let-7f-5p	28816.8	-0.115618	0.270754	-0.427022	0.669363	0.972039	33431.2	26643	29839.2	29065.6	26112.1	27809.6
241	hsa-miR-199b-3p	41009.1	0.138074	0.328244	0.420643	0.674016	0.972039	31613.4	37364.3	48166.4	43378.3	47284.2	38248.1
240	hsa-miR-199a-3p	41044.2	0.137371	0.328296	0.418437	0.675627	0.972039	31647.9	37405.9	48220.5	43397.8	47326.2	38267
242	hsa-miR-4324	79.8467	-0.418406	1.00101	-0.417985	0.675958	0.972039	127.324	131.03	14.571	72.5899	123.732	9.83339
244	hsa-miR-654-3p	334.971	0.160241	0.38798	0.413015	0.679596	0.973081	368.83	245.282	335.132	442.564	352.519	265.502
243	hsa-miR-1292-5p	27.0096	-0.211869	0.517562	-0.409361	0.682275	0.973081	32.8579	25.5668	29.1419	17.1718	21.011	36.3079
273	hsa-miR-29a-3p	4993.01	-0.155739	0.396858	-0.392431	0.69474	0.976058	3549.47	4927.21	7310.46	4807.33	4701.8	4661.78
263	hsa-miR-181d-5p	463.037	-0.115857	0.295684	-0.391826	0.695187	0.976058	515.869	473.785	453.781	376.999	492.592	465.195
297	hsa-miR-514a-3p	2697.55	0.41399	1.05944	0.390765	0.695971	0.976058	3928.16	986.72	2025.36	3737.99	121.397	5385.67
250	hsa-miR-127-3p	6032.13	0.148298	0.388122	0.382091	0.702394	0.976058	7354.41	5479.29	4331.74	6479.24	7648.02	4900.05
253	hsa-miR-130a-3p	194.591	-0.149808	0.39224	-0.381929	0.702514	0.976058	191.397	202.937	217.524	187.329	242.794	125.565
257	hsa-miR-146b-5p	6078.95	0.142431	0.376042	0.378765	0.704863	0.976058	7385.63	4875.27	5074.86	4901.77	7694.71	6541.47
274	hsa-miR-29c-5p	132.922	0.1621	0.428326	0.37845	0.705096	0.976058	82.1447	142.215	152.995	173.279	119.063	127.834
248	hsa-miR-106b-3p	2055.02	-0.16494	0.443524	-0.371885	0.709979	0.976058	3152.71	2073.31	1290.57	1792.11	2012.39	2009.04
293	hsa-miR-431-3p	97.1439	-0.208207	0.564036	-0.369138	0.712025	0.976058	179.897	68.7108	64.5285	99.9087	67.7023	102.116
298	hsa-miR-582-3p	6.29983	0.400894	1.10999	0.361171	0.717972	0.976058	1.64289	3.99482	11.4486	9.36644	0	11.3462
262	hsa-miR-181b-5p	2785.66	-0.180106	0.512505	-0.351423	0.725271	0.976058	3934.73	3425.95	1515.38	2144.92	3576.55	2116.45
282	hsa-miR-345-5p	220.196	-0.124464	0.364146	-0.341797	0.732503	0.976058	206.183	197.344	284.134	174.06	254.467	204.988
251	hsa-miR-129-5p	483.889	0.333986	0.983912	0.339447	0.734273	0.976058	422.224	222.911	640.081	1381.55	128.401	108.167
249	hsa-miR-125a-5p	38765	-0.323067	0.956332	-0.337819	0.7355	0.976058	55923.3	65277.7	8059.82	29873.5	67324.1	6131.5
264	hsa-miR-186-5p	725.937	-0.166534	0.514813	-0.323486	0.746328	0.976058	437.01	585.64	1281.2	631.454	667.684	752.633
275	hsa-miR-30a-3p	1206.04	0.122955	0.382683	0.321298	0.747985	0.976058	1607.57	992.312	863.849	1237.15	1265.33	1270.02
259	hsa-miR-148b-5p	18.3998	0.203254	0.635086	0.320042	0.748936	0.976058	28.7506	9.58756	13.5302	21.0745	14.0074	23.4489
279	hsa-miR-331-3p	155.551	0.206182	0.648538	0.317918	0.750547	0.976058	211.112	179.767	42.6721	214.648	133.07	152.039
302	hsa-miR-675-3p	6.64525	-0.474768	1.4952	-0.317528	0.750843	0.976058	0	3.99482	19.7749	7.02483	0	9.07698
301	hsa-miR-664a-3p	114.474	0.229171	0.72189	0.31746	0.750894	0.976058	138.825	143.014	33.305	142.838	177.427	51.4362
280	hsa-miR-339-3p	163.256	-0.196773	0.6609	-0.297734	0.765906	0.976058	59.1442	139.02	324.724	145.96	182.096	128.591
295	hsa-miR-483-3p	19.5774	-0.326551	1.10708	-0.294965	0.768021	0.976058	8.21447	51.1336	5.20391	20.294	30.3493	2.26924
254	hsa-miR-130b-5p	70.9126	0.230768	0.789879	0.292157	0.770167	0.976058	110.074	67.1129	17.6933	92.8839	109.724	27.9873
286	hsa-miR-365a-3p	137.428	0.118348	0.409422	0.289062	0.772534	0.976058	98.5736	129.432	168.607	180.304	119.063	128.591
288	hsa-miR-365b-3p	137.428	0.118348	0.409422	0.289062	0.772534	0.976058	98.5736	129.432	168.607	180.304	119.063	128.591
290	hsa-miR-370-3p	5383.22	0.117266	0.406557	0.288437	0.773012	0.976058	7209.02	3879.77	4405.63	5164.03	4853.55	6787.31
284	hsa-miR-3605-3p	60.5121	0.216902	0.754024	0.287658	0.773608	0.976058	87.8948	65.515	13.5302	69.4678	93.3824	33.2822
268	hsa-miR-22-5p	24.1312	0.269213	0.940686	0.286188	0.774734	0.976058	14.786	7.19067	44.7536	24.9772	4.66912	48.4105
289	hsa-miR-365b-5p	32.1691	0.138203	0.4853	0.284778	0.775814	0.976058	29.5721	32.7575	29.1419	21.0745	37.353	43.1156
296	hsa-miR-501-5p	69.0374	0.177911	0.63569	0.279871	0.779576	0.976058	96.9307	48.7368	48.9168	123.325	63.0331	33.2822
285	hsa-miR-3609	32.9497	-0.152551	0.545908	-0.279444	0.779904	0.976058	17.2504	41.5461	44.7536	26.5383	37.353	30.2566
261	hsa-miR-181a-2-3p	457.348	-0.154952	0.559383	-0.277005	0.781776	0.976058	736.016	483.373	224.809	419.929	576.636	303.322
272	hsa-miR-28-3p	2847.73	0.1029	0.374078	0.275076	0.783258	0.976058	2613.02	3095.98	2528.06	3316.5	3529.86	2002.99
306	hsa-miR-99b-5p	20285.1	-0.150257	0.558284	-0.269141	0.787821	0.976058	32225.4	21853.2	9941.55	18996.7	25640.5	13053.4
252	hsa-miR-1307-3p	1385.49	0.145715	0.542137	0.268779	0.788099	0.976058	2189.98	1047.44	709.814	1340.18	1157.94	1867.59
304	hsa-miR-769-5p	244.876	-0.100094	0.377249	-0.265326	0.790758	0.976058	302.292	235.694	219.605	204.501	310.497	196.668
256	hsa-miR-146b-3p	837.584	0.139024	0.524484	0.265069	0.790957	0.976058	1134.42	844.504	411.109	685.311	1220.98	729.184
300	hsa-miR-654-5p	311.499	0.122021	0.466226	0.261721	0.793536	0.976058	446.046	218.916	231.054	323.923	245.129	403.925
294	hsa-miR-432-5p	713.649	-0.11757	0.452327	-0.259922	0.794924	0.976058	1005.45	481.775	742.078	598.672	543.953	909.967
287	hsa-miR-365a-5p	80.4093	-0.163902	0.643221	-0.254814	0.798867	0.976058	36.9651	80.6953	138.424	60.1013	49.0258	117.244
276	hsa-miR-30b-5p	253.661	-0.176036	0.697224	-0.252482	0.800669	0.976058	101.038	153.401	553.696	259.919	191.434	262.476
260	hsa-miR-151a-3p	10720.8	0.0620662	0.25882	0.239804	0.810482	0.976058	10599.1	10896.3	9973.82	9961.99	11803.5	11089.8
245	hsa-let-7a-5p	212461	0.0789876	0.332987	0.237209	0.812494	0.976058	161069	221613	237255	206270	253907	194650
292	hsa-miR-425-3p	148.639	0.0767784	0.330685	0.23218	0.816398	0.976058	168.397	118.247	147.791	152.985	147.077	157.334
278	hsa-miR-330-5p	34.9796	0.140367	0.619154	0.226708	0.820651	0.976058	59.1442	23.9689	16.6525	31.2215	35.0184	43.8721
291	hsa-miR-382-5p	524.627	0.075875	0.33488	0.226574	0.820755	0.976058	615.264	395.487	522.473	586.964	499.596	527.978
303	hsa-miR-766-3p	5.11758	-0.201338	0.896717	-0.224528	0.822347	0.976058	4.10723	5.59274	6.24469	6.24429	7.00368	1.51283
281	hsa-miR-342-3p	511.125	0.100076	0.478988	0.208932	0.834501	0.976058	709.73	467.394	301.827	569.792	644.339	373.669
258	hsa-miR-148a-5p	230.724	0.0755005	0.363482	0.207715	0.835452	0.976058	289.971	182.164	200.871	234.161	266.14	211.04
246	hsa-let-7d-5p	8149.56	-0.0530517	0.255548	-0.2076	0.835541	0.976058	8492.12	7620.51	8785.24	7571.21	8208.31	8219.96
305	hsa-miR-92b-3p	2228.41	0.151795	0.73396	0.206816	0.836153	0.976058	2933.39	2894.64	504.779	2471.18	3324.41	1242.03
277	hsa-miR-323a-3p	170.696	0.146721	0.715814	0.204971	0.837595	0.976058	317.079	122.241	46.8352	236.503	151.746	149.77
270	hsa-miR-23b-5p	125.542	0.0897191	0.441702	0.203121	0.83904	0.976058	82.1447	126.236	158.199	140.497	93.3824	152.796
266	hsa-miR-197-3p	2122.55	-0.1719	0.874093	-0.196661	0.844093	0.976058	2039.65	4211.34	494.372	2069.98	3359.43	560.503
269	hsa-miR-221-3p	5164.97	0.0980945	0.499123	0.196534	0.844192	0.976058	6455.75	2961.76	5552.57	6953.02	3256.71	5810.02
255	hsa-miR-139-5p	781.712	-0.123946	0.632084	-0.196091	0.844539	0.976058	288.328	715.871	1442.52	769.609	583.64	890.3
265	hsa-miR-193b-3p	289.347	-0.151156	0.80844	-0.186973	0.851682	0.976058	96.1093	166.983	651.53	244.308	135.405	441.746
299	hsa-miR-6511a-3p	35.0498	-0.152906	0.824269	-0.185504	0.852833	0.976058	53.3941	45.5409	10.4078	32.002	58.364	10.5898
271	hsa-miR-25-3p	3546.07	0.0594634	0.328068	0.181253	0.856169	0.976058	4339.7	2870.68	3207.69	3662.28	3931.4	3264.69
247	hsa-let-7g-5p	60293.1	0.0452749	0.252235	0.179495	0.857549	0.976058	58096	60686.1	59259	65620.5	61861.2	56235.7
267	hsa-miR-218-5p	106.212	0.159799	0.892947	0.178957	0.857972	0.976058	21.3576	59.9222	220.646	81.9564	53.6949	199.694
283	hsa-miR-34a-5p	226.63	-0.0755428	0.422991	-0.178592	0.858258	0.976058	327.757	210.926	158.199	231.819	240.46	190.617
307	hsa-miR-16-2-3p	34.1815	0.0960121	0.549261	0.174803	0.861235	0.976253	19.7147	39.1492	41.6313	36.6852	21.011	46.8977
308	hsa-miR-134-5p	1284.1	-0.0632742	0.377609	-0.167565	0.866925	0.979513	1062.95	1073.01	1800.55	1126.31	1365.72	1276.07
309	hsa-miR-874-3p	454.313	-0.0699113	0.434168	-0.161024	0.872075	0.982142	391.009	608.011	394.457	379.341	620.993	332.066
310	hsa-miR-2277-5p	12.8963	-0.0986162	0.638945	-0.154342	0.87734	0.984885	10.6788	17.5772	11.4486	7.02483	14.0074	16.6411
313	hsa-miR-107	168.032	0.0529136	0.368551	0.143572	0.885838	0.989134	194.683	128.633	172.77	163.132	144.743	204.232
312	hsa-let-7i-3p	15.6316	-0.0761086	0.559793	-0.135958	0.891854	0.989134	12.3217	21.572	13.5302	14.8302	18.6765	12.8591
316	hsa-miR-18a-3p	14.3557	0.0847327	0.645289	0.13131	0.89553	0.989134	20.5362	7.19067	13.5302	15.6107	18.6765	10.5898
314	hsa-miR-126-5p	36.578	0.125286	0.980399	0.127791	0.898315	0.989134	12.3217	13.5824	80.1402	41.3685	7.00368	65.0517
321	hsa-miR-493-5p	1917.4	0.0421592	0.338129	0.124684	0.900774	0.989134	2211.34	1451.72	2005.59	1732.01	1872.32	2231.42
315	hsa-miR-142-5p	24.1231	0.132829	1.07362	0.123721	0.901536	0.989134	4.10723	3.99482	61.4062	18.7329	18.6765	37.8207
319	hsa-miR-484	583.502	-0.100843	0.832044	-0.121199	0.903534	0.989134	1009.56	671.129	130.098	703.264	805.423	181.54
318	hsa-miR-3615	153.603	0.0631614	0.545086	0.115874	0.907752	0.989134	179.075	180.566	92.6296	211.525	77.0405	180.783
311	hsa-let-7d-3p	3625.48	-0.0696077	0.612294	-0.113683	0.909489	0.989134	4306.03	4987.13	1844.27	4149.33	4904.91	1561.24
322	hsa-miR-589-5p	158.518	-0.0529797	0.482031	-0.109909	0.912481	0.989134	84.609	197.344	201.912	128.008	175.092	164.142
317	hsa-miR-28-5p	143.083	-0.0508873	0.467412	-0.10887	0.913305	0.989134	92.0021	121.442	223.768	141.277	140.074	139.937
320	hsa-miR-485-3p	238.894	0.11599	1.08972	0.10644	0.915233	0.989134	459.189	199.741	28.1011	263.041	457.574	25.7181
323	hsa-miR-1254	24.959	-0.0588938	0.575888	-0.102266	0.918545	0.98964	35.3222	27.9637	12.4894	18.7329	28.0147	27.2309
325	hsa-miR-769-3p	10.9808	0.0746942	0.772506	0.0966908	0.922972	0.99133	20.5362	7.19067	4.16313	12.4886	11.6728	9.83339
324	hsa-miR-151a-5p	134.342	-0.0371296	0.398747	-0.0931159	0.925812	0.99133	130.61	158.195	118.649	161.571	144.743	92.2826
334	hsa-miR-214-3p	5580.97	0.0247866	0.29744	0.0833331	0.933587	0.993353	5157.87	5347.46	6091.7	5135.15	6667.5	5086.13
336	hsa-miR-27a-3p	2127.06	0.0433224	0.597031	0.072563	0.942154	0.993353	823.911	1996.61	3465.81	2000.52	1697.23	2778.31
327	hsa-let-7f-1-3p	22.164	-0.0401178	0.599077	-0.0669659	0.946609	0.993353	20.5362	12.7834	33.305	14.8302	30.3493	21.1796
347	hsa-miR-9-5p	127.843	0.0517006	0.827792	0.0624561	0.9502	0.993353	27.1078	79.8963	270.603	151.424	72.3714	165.655
332	hsa-miR-16-5p	88.4239	-0.0415342	0.67258	-0.0617535	0.950759	0.993353	46.001	66.314	158.199	76.4926	44.3566	139.18
331	hsa-miR-1306-5p	24.1779	0.0723601	1.22276	0.0591777	0.952811	0.993353	20.5362	48.7368	1.04078	37.4658	35.0184	2.26924
344	hsa-miR-618	15.0323	0.0514869	0.978759	0.0526042	0.958047	0.993353	0.821447	16.7782	27.0603	18.7329	11.6728	15.1283
333	hsa-miR-191-5p	5418.07	-0.0185625	0.369339	-0.0502587	0.959916	0.993353	6695.61	5161.3	4500.34	5893.83	6256.62	4000.68
340	hsa-miR-487a-5p	38.9404	0.0194991	0.443899	0.0439268	0.964963	0.993353	51.7512	30.3606	34.3458	39.8074	35.0184	42.3592
338	hsa-miR-30d-5p	17541.3	0.0135444	0.315086	0.0429865	0.965712	0.993353	18408.6	20164.2	13802.9	17986.7	18935.6	15949.8
337	hsa-miR-296-5p	16.9026	0.0256429	0.603417	0.0424961	0.966103	0.993353	8.21447	18.3762	23.938	16.3913	16.3419	18.154
348	hsa-miR-98-5p	645.723	-0.0147523	0.371337	-0.0397276	0.96831	0.993353	779.553	496.955	672.345	660.334	501.93	763.223
329	hsa-miR-127-5p	56.9288	-0.0151632	0.415008	-0.0365372	0.970854	0.993353	44.3581	52.7316	74.9363	50.7349	56.0294	62.7824
326	hsa-let-7e-3p	91.9221	0.0219176	0.620067	0.0353472	0.971803	0.993353	132.253	97.4735	42.6721	104.592	128.401	46.1413
341	hsa-miR-500a-5p	22.1002	-0.0209287	0.647053	-0.0323447	0.974197	0.993353	34.5008	8.7886	22.8972	18.7329	28.0147	19.6668
330	hsa-miR-1294	23.4143	-0.0215435	0.886589	-0.0242993	0.980614	0.993353	8.21447	28.7627	32.2643	7.02483	51.3603	12.8591
342	hsa-miR-503-5p	90.142	-0.0119444	0.504276	-0.0236863	0.981103	0.993353	58.3227	110.257	100.956	65.5651	135.405	70.3466
335	hsa-miR-222-3p	4276.8	-0.00964229	0.428028	-0.0225272	0.982027	0.993353	5543.95	3029.67	4301.55	5037.58	2922.87	4825.17
346	hsa-miR-758-3p	46.7609	-0.007701	0.398715	-0.0193146	0.98459	0.993353	54.2155	40.7471	46.8352	50.7349	37.353	50.6798
328	hsa-miR-1248	50.6579	-0.00474843	0.372881	-0.0127344	0.98984	0.993353	53.3941	51.9326	45.7944	46.0517	58.364	48.4105
343	hsa-miR-548o-3p	22.5146	0.00704982	0.643193	0.0109607	0.991255	0.993353	10.6788	19.1751	37.4682	15.6107	25.6802	26.4745
339	hsa-miR-409-3p	924.6	0.00617157	0.698842	0.00883114	0.992954	0.993353	1867.15	583.243	317.439	1178.61	859.118	742.043
345	hsa-miR-664a-5p	110.082	-0.00272718	0.327367	-0.00833065	0.993353	0.993353	122.396	111.855	95.752	114.739	114.393	101.36
349	hsa-miR-133a-3p	78.4962	-0.65188	1.33747	-0.487396	NA	NA	7.39302	6.39171	274.767	93.6644	9.33824	79.4236
