# Supplementary material for: Blood Plasma Small Non-Coding RNAs as Diagnostic Molecules of Progesterone Receptor-Negative Phenotype of Serous Ovarian Tumors
Source: Preprints.org preprint supplement (doi:10.20944/preprints202307.1155.v1), 2023-07-18
Supplement: Supplementary file 2 [file TableS2.xlsx]

## Sheet: Sheet 1
ovary: HGSOC vs BSC
Column1	Gene	baseMean	log2FoldChange	lfcSE	stat	pvalue	padj	s6	s8	s30	s18	s21	s34
1	hsa_piR_018849|gb|DQ595899|Homo	295.196	5.61476	0.543514	10.3305	5.1303e-25	1.60578e-22	9.79426	13.9145	11.5424	449.82	467.975	818.128
2	hsa_piR_019224|gb|DQ596390|Homo	808.208	-3.47705	0.583377	-5.96022	2.51899e-09	3.94223e-07	1405.92	1380.85	1664.2	210.584	131.488	56.2072
3	hsa_piR_000796|gb|DQ570994|Homo	852.069	5.80262	1.03192	5.62312	1.87541e-08	1.95667e-06	30.2732	50.3572	9.44375	280.779	513.53	4228.03
4	hsa_piR_009294|gb|DQ582566|Homo	660.713	-2.23231	0.469294	-4.75673	1.96755e-06	0.000153961	986.549	1082.02	1198.31	167.608	196.715	333.08
5	hsa_piR_016659|gb|DQ592932|Homo	1151.71	3.15857	0.683143	4.62359	3.77157e-06	0.0002361	211.912	364.427	119.621	828.012	2192.86	3193.4
6	hsa_piR_016963|gb|DQ593398|Homo	96.7862	-3.06515	0.680221	-4.5061	6.60287e-06	0.00034445	251.089	147.759	120.67	30.0835	20.7069	10.4087
7	hsa_piR_020668|gb|DQ598445|Homo	100.207	-2.89602	0.674965	-4.29062	1.78172e-05	0.000796681	163.831	91.438	274.394	18.6231	23.8129	29.1445
8	hsa_piR_019201|gb|DQ596354|Homo	130.69	-2.53585	0.597353	-4.24514	2.18454e-05	0.000854701	225.268	245.16	199.368	57.3019	38.3077	18.7357
9	hsa_piR_019914|gb|DQ597347|Homo	34369.5	3.25862	0.77551	4.2019	2.64681e-05	0.000920502	6437.5	9938.92	3132.18	123514	18953	44241.3
10	hsa_piR_017295|gb|DQ593909|Homo	394.261	3.08208	0.786758	3.91744	8.94935e-05	0.00280115	101.504	63.6091	84.9938	928.29	1062.26	124.905
12	hsa_piR_007424|gb|DQ580112|Homo	158.792	-1.99168	0.533568	-3.73276	0.000189395	0.0052002	286.705	211.368	261.802	51.5717	47.6258	93.6787
11	hsa_piR_005007|gb|DQ576900|Homo	9402.22	2.84278	0.764226	3.71982	0.000199369	0.0052002	3112.79	579.107	3209.83	25040.9	17192.9	7277.8
13	hsa_piR_017458|gb|DQ594126|Homo	465.294	-1.75242	0.478487	-3.66243	0.000249838	0.00601532	663.339	881.913	607.024	282.212	147.019	210.257
14	hsa_piR_000801|gb|DQ570999|Homo	31.323	2.54664	0.710069	3.58647	0.000335189	0.00749386	8.90387	11.2641	7.34514	47.274	56.9438	56.2072
16	hsa_piR_019168|gb|DQ596311|Homo	619.843	-2.30564	0.64756	-3.5605	0.000370144	0.00753562	1031.96	969.376	1093.38	323.756	236.058	64.5342
15	hsa_piR_019167|gb|DQ596309|Homo	108.578	-2.54731	0.71755	-3.55002	0.000385207	0.00753562	186.981	185.526	184.153	61.5995	18.6362	14.5722
17	hsa_piR_016658|gb|DQ592931|Homo	1307.59	2.24391	0.638609	3.51375	0.000441824	0.00813476	324.991	736.142	306.397	965.536	2922.77	2589.7
18	hsa_piR_001170|gb|DQ571526|Homo	3027.09	1.5819	0.454403	3.48127	0.000499049	0.00867792	1283.94	1094.61	2168.92	4953.75	4439.55	4221.79
19	hsa_piR_020829|gb|DQ598677|Homo	30040.3	2.67352	0.781089	3.42281	0.000619768	0.0102099	5545.33	14768.6	4109.61	99935.9	18129.9	37752.5
20	hsa_piR_020575|gb|DQ598300|Homo	135.364	-4.38561	1.29114	-3.39671	0.000682021	0.0106736	14.2462	291.542	470.089	11.4604	24.8482	0
23	hsa_piR_004801|gb|DQ576605|Homo	441.61	2.594	0.796925	3.25501	0.00113387	0.0164901	181.639	91.438	103.881	979.862	1155.44	137.395
22	hsa_piR_002158|gb|DQ572892|Homo	251.419	-1.50549	0.463688	-3.24677	0.00116721	0.0164901	472.796	357.138	286.461	127.497	150.125	114.496
21	hsa_piR_001169|gb|DQ571525|Homo	1343.75	1.63283	0.504566	3.2361	0.00121174	0.0164901	518.205	434.662	1012.58	2302.1	1963.01	1831.94
25	hsa_piR_019068|gb|DQ596183|Homo	81.2178	-1.88625	0.588994	-3.20249	0.00136244	0.0172527	159.379	87.4625	136.41	27.2184	35.2016	41.635
24	hsa_piR_017724|gb|DQ594465|Homo	1205.91	1.98251	0.619684	3.19922	0.00137801	0.0172527	552.931	506.885	401.36	3145.87	736.129	1892.31
26	hsa_piR_001312|gb|DQ571813|Homo	17624.8	1.81724	0.573845	3.16678	0.00154137	0.0181348	6314.63	11908.8	5151.57	38459.6	28532	15382
27	hsa_piR_008114|gb|DQ581033|Homo	168321	-1.16057	0.366981	-3.16247	0.00156434	0.0181348	215972	274700	207109	115008	96905	100230
28	hsa_piR_020572|gb|DQ598296|Homo	22.0146	-7.36182	2.35094	-3.13143	0.00173955	0.0194457	0	77.5235	54.5639	0	0	0
29	hsa_piR_020813|gb|DQ598646|Homo	902.235	-1.41999	0.470278	-3.01948	0.00253208	0.027329	1247.43	1553.12	1139.02	595.939	307.497	570.399
30	hsa_piR_000794|gb|DQ570992|Homo	1516.08	2.37808	0.799727	2.97362	0.00294313	0.0307066	584.094	620.851	262.851	5594.09	1031.2	1003.4
31	hsa_piR_007819|gb|DQ580647|Homo	27174.2	1.63379	0.566093	2.88608	0.00390068	0.0393843	9294.75	20750.5	9689.82	54065.7	24110	45134.4
34	hsa_piR_017723|gb|DQ594464|Homo	557.523	1.74494	0.610838	2.85663	0.00428161	0.0417617	263.555	227.932	277.017	1421.09	356.158	799.392
33	hsa_piR_010024|gb|DQ583491|Homo	654.674	1.18949	0.418312	2.84355	0.00446144	0.0417617	370.401	466.466	360.961	870.988	1126.45	732.776
32	hsa_piR_007870|gb|DQ580708|Homo	454.694	2.15364	0.758797	2.83823	0.00453642	0.0417617	121.983	90.7754	287.51	1373.81	283.684	570.399
36	hsa_piR_019675|gb|DQ596992|Homo	2181.6	-0.961138	0.341692	-2.81288	0.00491003	0.0428966	2739.72	2908.79	2999.44	1462.63	1546.8	1432.24
35	hsa_piR_019102|gb|DQ596225|Homo	181.998	-2.11359	0.751812	-2.81132	0.0049338	0.0428966	437.18	259.074	191.498	127.497	53.8378	22.8992
37	hsa_piR_009799|gb|DQ583196|Homo	240.418	-10.8097	3.90689	-2.76684	0.00566032	0.0478832	0	805.052	637.453	0	0	0
38	hsa_piR_011876|gb|DQ586065|Homo	411.263	1.4376	0.528805	2.71859	0.00655616	0.054002	244.857	218.656	201.991	945.481	398.607	457.985
39	hsa_piR_001311|gb|DQ571812|Homo	4917.52	1.68353	0.625283	2.69244	0.00709322	0.0569276	1789.68	3776.79	1438.6	11152.4	7588.03	3759.64
40	hsa_piR_004308|gb|DQ575882|Homo	827.937	1.72089	0.667512	2.57807	0.00993551	0.0777454	448.755	381.654	325.81	2230.47	419.314	1161.62
41	hsa_piR_008560|gb|DQ581618|Homo	916.819	-2.13389	0.83601	-2.55247	0.0106963	0.081657	411.359	918.356	3151.07	472.74	409.996	137.395
42	hsa_piR_006426|gb|DQ578783|Homo	27463.8	-1.10514	0.444074	-2.48864	0.0128232	0.0955631	30762	42303.3	39424	12819.9	15689.6	23784
43	hsa_piR_014629|gb|DQ590023|Homo	101253	1.10722	0.449327	2.46418	0.0137325	0.0999601	67707.7	68264.4	56626.8	165160	86349.6	163409
44	hsa_piR_004307|gb|DQ575881|Homo	582.472	1.73366	0.710197	2.4411	0.0146427	0.104163	299.17	273.651	235.045	1624.51	246.412	816.046
48	hsa_piR_020548|gb|DQ598263|Homo	6727.04	-1.23725	0.517377	-2.3914	0.0167844	0.113903	8619.84	11867.7	7851.43	2799.2	2960.04	6263.99
45	hsa_piR_000291|gb|DQ570344|Homo	174.751	1.2898	0.5399	2.38895	0.0168965	0.113903	128.216	67.5846	108.603	326.621	178.079	239.401
46	hsa_piR_019122|gb|DQ596252|Homo	18.0192	-2.20799	0.929009	-2.37672	0.0174676	0.113903	24.0405	29.8167	34.6271	7.16273	4.14137	8.327
47	hsa_piR_019269|gb|DQ596455|Homo	18.0192	-2.20799	0.929009	-2.37672	0.0174676	0.113903	24.0405	29.8167	34.6271	7.16273	4.14137	8.327
49	hsa_piR_006927|gb|DQ579443|Homo	17.7339	-2.17955	0.930866	-2.34143	0.0192102	0.12271	24.0405	29.1542	33.5778	7.16273	4.14137	8.327
50	hsa_piR_005076|gb|DQ577008|Homo	50.2276	-1.6097	0.695362	-2.31491	0.020618	0.127123	105.956	55.6579	66.1063	30.0835	28.9896	14.5722
51	hsa_piR_018292|gb|DQ595186|Homo	506.01	1.37738	0.59545	2.31317	0.0207133	0.127123	286.705	360.451	196.22	424.034	546.661	1221.99
53	hsa_piR_018573|gb|DQ595539|Homo	1135.23	-1.49967	0.651931	-2.30035	0.0214284	0.128464	1950.84	1068.1	2012.04	219.18	597.393	963.85
52	hsa_piR_014923|gb|DQ590404|Homo	1058.28	-1.45117	0.63241	-2.29466	0.0217527	0.128464	1820.84	983.953	1843.63	226.342	586.004	888.907
54	hsa_piR_005931|gb|DQ578144|Homo	1073.72	-1.85493	0.824081	-2.25091	0.0243915	0.14138	651.764	1131.71	3264.39	699.083	568.403	126.987
60	hsa_piR_019574|gb|DQ596863|Homo	76.07	-1.76974	0.795002	-2.22608	0.0260086	0.144684	121.093	120.592	111.751	68.7622	23.8129	10.4087
59	hsa_piR_010023|gb|DQ583490|Homo	2692.51	1.07223	0.482425	2.22258	0.0262439	0.144684	1936.59	2103.74	1167.35	3867.88	4581.39	2498.1
61	hsa_piR_020500|gb|DQ598190|Homo	927.009	1.52182	0.68646	2.21691	0.0266291	0.144684	341.909	461.166	632.732	670.432	757.871	2697.95
57	hsa_piR_004153|gb|DQ575660|Homo	197574	1.89115	0.855392	2.21086	0.0270456	0.144684	48367.6	180909	22447.8	574517	186018	173187
58	hsa_piR_004309|gb|DQ575884|Homo	86.1885	1.73423	0.785789	2.20699	0.0273147	0.144684	46.3001	39.0931	34.1024	240.668	38.3077	118.66
56	hsa_piR_002485|gb|DQ573352|Homo	691.67	-1.4945	0.680028	-2.19771	0.0279696	0.144684	1236.75	646.03	1178.9	137.524	295.073	655.751
55	hsa_piR_001318|gb|DQ571823|Homo	1556.92	-1.48839	0.678229	-2.19453	0.0281973	0.144684	2612.4	1419.94	2853.59	275.049	800.32	1380.2
62	hsa_piR_010431|gb|DQ584049|Homo	2514.6	-1.26821	0.585221	-2.16707	0.0302299	0.152612	5395.75	3438.86	1825.79	1138.87	1133.7	2154.61
65	hsa_piR_020009|gb|DQ597484|Homo	275.231	1.14523	0.538752	2.1257	0.0335279	0.162362	194.995	195.465	123.293	290.807	278.507	568.318
66	hsa_piR_020326|gb|DQ597916|Homo	541498	1.65753	0.782165	2.11916	0.0340772	0.162362	159094	499646	123254	1.44342e+06	738002	285574
63	hsa_piR_000765|gb|DQ570956|Homo	649793	1.65751	0.782176	2.1191	0.0340818	0.162362	190919	599575	147902	1.7321e+06	885609	342652
64	hsa_piR_012681|gb|DQ587153|Homo	2137.13	1.28577	0.607276	2.11728	0.0342362	0.162362	1614.27	1425.9	689.919	5006.75	2245.66	1840.27
67	hsa_piR_020582|gb|DQ598312|Homo	371.37	1.53295	0.729247	2.10209	0.0355451	0.166054	170.954	196.128	205.664	320.89	1134.74	199.848
68	hsa_piR_017008|gb|DQ593502|Homo	1955.87	1.18018	0.56431	2.09136	0.0364955	0.167987	1500.3	1563.06	530.424	2896.61	3140.19	2104.65
69	hsa_piR_015800|gb|DQ591595|Homo	557.609	0.83823	0.40815	2.05373	0.0400018	0.18057	376.634	465.141	358.863	734.896	829.309	580.808
70	hsa_piR_020439|gb|DQ598084|Homo	40.952	1.38198	0.674198	2.04981	0.0403831	0.18057	23.1501	25.8412	18.8875	57.3019	39.343	81.1882
71	hsa_piR_005691|gb|DQ577820|Homo	789.823	-1.32593	0.649343	-2.04196	0.0411553	0.180591	646.421	962.087	1777.52	346.676	250.553	755.675
73	hsa_piR_019354|gb|DQ596587|Homo	24.8781	-1.55787	0.764679	-2.03728	0.0416219	0.180591	42.7386	37.7679	30.9545	12.8929	12.4241	12.4905
72	hsa_piR_010624|gb|DQ584310|Homo	37.6248	1.53211	0.753865	2.03234	0.0421188	0.180591	16.027	29.8167	12.067	70.1948	37.2723	60.3707
74	hsa_piR_006701|gb|DQ579162|Homo	153.869	1.07706	0.536904	2.00605	0.0448505	0.189706	89.0387	79.5113	128.54	257.858	232.952	135.314
75	hsa_piR_020496|gb|DQ598175|Homo	63.9673	1.74954	0.88723	1.97192	0.0486191	0.202904	33.8347	6.62594	47.2188	71.6273	62.1206	162.376
76	hsa_piR_016926|gb|DQ593325|Homo	5730.23	1.49662	0.763753	1.95956	0.0500471	0.206115	3753.87	2623.87	2619.07	4423.7	18362.8	2598.02
79	hsa_piR_020388|gb|DQ598008|Homo	2280.02	1.31954	0.688505	1.91654	0.055297	0.22426	1080.93	1316.57	1516.25	2698.92	6059.86	1007.57
77	hsa_piR_004152|gb|DQ575658|Homo	188.264	1.14013	0.597263	1.90893	0.0562708	0.22426	106.846	117.279	128.54	435.494	191.538	149.886
78	hsa_piR_017138|gb|DQ593692|Homo	11188.8	-0.691162	0.362554	-1.90637	0.0566023	0.22426	15994.9	12894.7	12566.5	8578.09	7749.54	9349.14
80	hsa_piR_011324|gb|DQ585292|Homo	41.0126	-1.23088	0.655359	-1.87818	0.0603563	0.236144	64.9983	59.6335	47.7434	30.0835	18.6362	24.981
82	hsa_piR_016271|gb|DQ592181|Homo	904706	0.863167	0.472707	1.82601	0.0678494	0.259222	715615	507176	702783	1.0417e+06	1.66423e+06	796727
81	hsa_piR_001346|gb|DQ571858|Homo	104.663	-1.17001	0.641144	-1.82488	0.0680195	0.259222	183.42	182.213	68.7295	54.4368	55.9085	83.27
83	hsa_piR_022367|gb|DQ600607|Homo	18.4419	1.59491	0.876264	1.82013	0.0687393	0.259222	10.6846	5.96335	11.0177	30.0835	34.1663	18.7357
84	hsa_piR_001184|gb|DQ571550|Homo	644.49	-0.750892	0.418715	-1.79332	0.0729214	0.271719	628.613	906.429	889.812	538.637	395.501	507.947
85	hsa_piR_020814|gb|DQ598650|Homo	327.17	1.13019	0.634658	1.78079	0.0749464	0.275979	126.435	226.607	262.851	478.471	672.973	195.684
86	hsa_piR_018569|gb|DQ595533|Homo	4379.9	1.08239	0.609827	1.77491	0.0759122	0.276285	2297.2	4346.62	1785.92	9758.51	4393.99	3697.19
91	hsa_piR_019752|gb|DQ597110|Homo	7540.63	1.05146	0.598971	1.75545	0.0791821	0.283709	5529.31	4550.04	4646.33	6588.28	18477.8	5452.1
90	hsa_piR_016945|gb|DQ593356|Homo	2977.79	1.05634	0.604138	1.74852	0.0803746	0.283709	2559.86	1885.08	1356.23	4512.52	1672.08	5880.94
88	hsa_piR_009295|gb|DQ582567|Homo	1001.9	1.46694	0.843324	1.73948	0.0819509	0.283709	337.457	1013.11	246.587	2687.46	1370.79	355.979
87	hsa_piR_001884|gb|DQ572514|Homo	166.676	-0.91085	0.524455	-1.73676	0.0824301	0.283709	225.268	288.891	138.508	100.278	115.958	131.15
89	hsa_piR_013855|gb|DQ588925|Homo	30761.9	0.970669	0.558996	1.73645	0.0824841	0.283709	30291	19321.3	12749.1	59178.5	37738.2	25293.3
92	hsa_piR_018570|gb|DQ595536|Homo	12159.2	0.918145	0.533947	1.71954	0.0855156	0.290939	7708.97	11413.9	6124.27	24200	13278.3	10229.7
93	hsa_piR_016677|gb|DQ592953|Homo	1350.87	1.46115	0.858029	1.70292	0.0885834	0.295729	466.563	1318.56	374.602	3754.7	1801.5	389.287
94	hsa_piR_020657|gb|DQ598428|Homo	86.8163	1.44751	0.85063	1.70169	0.0888131	0.295729	70.3406	51.0198	18.3629	157.58	36.237	187.357
95	hsa_piR_001918|gb|DQ572554|Homo	2619.72	-0.994917	0.595219	-1.67151	0.09462	0.311748	1843.1	2468.83	6154.18	1383.84	1857.4	2010.97
96	hsa_piR_019912|gb|DQ597341|Homo	198.994	-0.900098	0.541297	-1.66286	0.0963412	0.314113	311.636	302.143	163.167	100.278	135.63	181.112
97	hsa_piR_023338|gb|DQ601914|Homo	1.0801e+06	-0.798054	0.483638	-1.65011	0.0989213	0.3192	913447	1.12068e+06	2.08023e+06	754684	861208	750369
98	hsa_piR_001107|gb|DQ571425|Homo	105982	0.838835	0.516213	1.62498	0.104167	0.332697	67003.4	62326.9	98703	134752	194779	78327.9
99	hsa_piR_001104|gb|DQ571422|Homo	14859.8	1.25986	0.780173	1.61484	0.106345	0.336223	11777.2	2921.38	11566	12632.2	41083.4	9178.43
100	hsa_piR_014633|gb|DQ590027|Homo	34650.5	0.724726	0.452002	1.60337	0.108853	0.34071	18021.4	28498.2	31856.9	36243.4	37981.5	55301.7
101	hsa_piR_020401|gb|DQ598029|Homo	1.14117e+06	0.632427	0.397491	1.59105	0.111599	0.345847	890330	820302	974293	1.02318e+06	1.55291e+06	1.58599e+06
102	hsa_piR_017716|gb|DQ594453|Homo	218509	1.46678	0.931283	1.57501	0.115254	0.353672	60270.3	246575	41466	591785	313740	57216.9
324	hsa_piR_020815|gb|DQ598651|Homo	11.2411	-2.17223	1.38769	-1.56536	0.1175	NA	30.2732	15.9023	8.39445	1.43255	1.03534	10.4087
103	hsa_piR_000172|gb|DQ570169|Homo	87.3171	-1.14271	0.733793	-1.55727	0.119406	0.361704	111.298	153.059	95.4868	18.6231	53.8378	91.597
104	hsa_piR_002372|gb|DQ573194|Homo	640.792	2.1522	1.38569	1.55316	0.120385	0.361704	0	558.567	147.427	805.091	1163.72	1169.94
108	hsa_piR_015026|gb|DQ590548|Homo	1763.81	0.714701	0.462618	1.5449	0.122369	0.361704	1482.49	1225.8	1298.52	3065.65	1449.48	2060.93
105	hsa_piR_008488|gb|DQ581533|Homo	991.594	-0.636859	0.41252	-1.54383	0.122631	0.361704	1153.94	1468.97	997.89	923.992	661.584	743.185
107	hsa_piR_011872|gb|DQ586059|Homo	42.2571	-1.39345	0.907633	-1.53526	0.124719	0.361704	64.1079	39.7557	78.698	8.59528	12.4241	49.962
106	hsa_piR_009228|gb|DQ582496|Homo	387.88	-1.04013	0.677648	-1.53491	0.124805	0.361704	649.983	424.723	490.026	90.2504	214.316	457.985
109	hsa_piR_017194|gb|DQ593767|Homo	367.883	0.949894	0.622224	1.52661	0.126858	0.364279	337.457	259.737	155.297	320.89	313.709	820.209
111	hsa_piR_016745|gb|DQ593052|Homo	205.282	1.05337	0.697961	1.50921	0.131246	0.371347	136.229	113.304	151.1	541.503	158.407	131.15
110	hsa_piR_003384|gb|DQ574582|Homo	546.153	1.05117	0.697308	1.50746	0.131692	0.371347	161.16	239.859	664.735	518.582	562.191	1130.39
112	hsa_piR_015254|gb|DQ590835|Homo	3859.69	-0.603309	0.402577	-1.49862	0.133973	0.374405	4352.21	4664.66	4948.53	3976.75	2501.39	2714.6
114	hsa_piR_020497|gb|DQ598177|Homo	89.1008	0.928494	0.627309	1.48012	0.138841	0.383498	56.0944	56.9831	70.3035	83.0877	76.6153	191.521
113	hsa_piR_000753|gb|DQ570940|Homo	716.616	-0.916486	0.6224	-1.4725	0.140885	0.383498	1023.95	761.321	1024.12	209.152	419.314	861.844
115	hsa_piR_021032|gb|DQ598918|Homo	31.4922	1.2164	0.826114	1.47244	0.140902	0.383498	32.0539	13.9145	11.0177	53.0042	26.9189	52.0437
117	hsa_piR_016742|gb|DQ593049|Homo	640.096	0.610703	0.41959	1.45547	0.145538	0.391539	556.492	533.388	430.215	981.294	662.619	676.569
116	hsa_piR_004271|gb|DQ575827|Homo	3675.93	-0.721476	0.496708	-1.45252	0.146358	0.391539	3180.46	4235.3	6312.63	1885.23	2919.67	3522.32
118	hsa_piR_021190|gb|DQ599117|Homo	119.539	-0.978534	0.676848	-1.44572	0.148255	0.393253	192.324	65.5968	217.206	64.4646	65.2266	112.414
119	hsa_piR_001101|gb|DQ571419|Homo	748.72	-0.641566	0.450098	-1.42539	0.154045	0.405176	1012.37	804.39	920.241	759.25	398.607	597.462
120	hsa_piR_000651|gb|DQ570812|Homo	58.7883	-1.02246	0.726983	-1.40645	0.159591	0.415447	76.5733	54.3327	104.931	17.1906	41.4137	58.289
121	hsa_piR_000775|gb|DQ570968|Homo	124.338	-0.736064	0.52462	-1.40304	0.160604	0.415447	170.954	145.771	149.001	60.167	99.3929	120.741
122	hsa_piR_005799|gb|DQ577967|Homo	1703.47	-0.692144	0.497373	-1.3916	0.164043	0.420865	1674.82	1447.77	3189.89	1224.83	1140.95	1542.58
124	hsa_piR_017936|gb|DQ594740|Homo	976.386	-0.931419	0.679302	-1.37114	0.170331	0.431141	1243.87	1139.66	1458.54	206.287	606.711	1203.25
123	hsa_piR_004987|gb|DQ576872|Homo	9483.08	-0.612228	0.447004	-1.36963	0.170803	0.431141	13163.5	11372.8	9860.85	10519.2	6109.56	5872.62
125	hsa_piR_022437|gb|DQ600690|Homo	6417.11	-0.671419	0.492602	-1.363	0.172881	0.432894	5553.35	6100.51	11998.3	4680.13	5842.44	4327.96
126	hsa_piR_000552|gb|DQ570687|Homo	895.917	-0.599809	0.444315	-1.34996	0.177028	0.438655	1033.74	1064.79	1141.12	879.584	792.037	464.23
127	hsa_piR_015267|gb|DQ590853|Homo	62.8679	-2.16033	1.60382	-1.34699	0.177985	0.438655	117.531	87.4625	103.881	0	68.3326	0
128	hsa_piR_016792|gb|DQ593109|Homo	7.14077e+06	0.664697	0.513768	1.29377	0.195745	0.478659	5.48421e+06	5.79642e+06	5.29221e+06	9.33507e+06	1.24768e+07	4.45991e+06
130	hsa_piR_015149|gb|DQ590703|Homo	197.487	-0.688635	0.542662	-1.269	0.204443	0.494536	160.27	202.754	368.306	154.715	167.725	131.15
129	hsa_piR_005177|gb|DQ577145|Homo	11750.8	0.632085	0.499151	1.26632	0.205398	0.494536	9527.14	8862.2	9262.75	14561.8	20494.6	7796.15
131	hsa_piR_014634|gb|DQ590028|Homo	13849.2	0.56888	0.454343	1.25209	0.210536	0.503036	7722.33	11219.7	14517.7	13607.8	15393.5	20634.3
132	hsa_piR_001159|gb|DQ571511|Homo	18.6035	-1.18447	0.950015	-1.24679	0.212474	0.503565	39.177	21.8656	16.7889	17.1906	10.3534	6.24525
133	hsa_piR_002441|gb|DQ573293|Homo	104339	0.525951	0.423229	1.24271	0.213975	0.503565	73535.3	84570.9	98477.4	96800	163240	109408
134	hsa_piR_014880|gb|DQ590349|Homo	5705.26	0.555085	0.45367	1.22354	0.221124	0.516507	5621.91	3422.96	4818.41	9045.1	5348.58	5974.62
137	hsa_piR_015249|gb|DQ590830|Homo	6591.69	-0.567829	0.467376	-1.21493	0.224393	0.518284	10653.5	6092.56	6870.33	5114.19	3960.19	6859.37
139	hsa_piR_016735|gb|DQ593039|Homo	206685	-0.677952	0.558994	-1.21281	0.225203	0.518284	301047	234057	228016	106341	98804.8	271845
136	hsa_piR_011901|gb|DQ586098|Homo	16.4309	-2.0518	1.7018	-1.20566	0.227948	0.518284	24.0405	41.7434	14.1656	0	18.6362	0
138	hsa_piR_016374|gb|DQ592313|Homo	24615.2	0.590251	0.490896	1.2024	0.22921	0.518284	20799.4	27192.9	10954.8	31286.8	30977.4	26479.9
135	hsa_piR_004721|gb|DQ576479|Homo	75.243	-0.648362	0.54033	-1.19994	0.230164	0.518284	113.97	74.8732	87.0924	64.4646	59.0145	52.0437
144	hsa_piR_014635|gb|DQ590029|Homo	175196	0.516765	0.436335	1.18433	0.236283	0.526852	103644	150903	177903	166753	199115	252858
140	hsa_piR_000823|gb|DQ571031|Homo	815.394	0.749152	0.636612	1.17678	0.239284	0.526852	519.986	854.084	451.202	1799.28	774.436	493.375
143	hsa_piR_009981|gb|DQ583434|Homo	286017	0.625176	0.534733	1.16914	0.242348	0.526852	274738	280238	120020	422974	385562	232573
145	hsa_piR_014637|gb|DQ590031|Homo	211832	0.518582	0.445883	1.16304	0.244812	0.526852	121997	181572	218925	205204	232132	311163
147	hsa_piR_020499|gb|DQ598183|Homo	45.2587	0.956732	0.823934	1.16117	0.245571	0.526852	26.7116	11.9267	53.5146	85.9528	43.4844	49.962
141	hsa_piR_003231|gb|DQ574379|Homo	1549.85	-0.802456	0.691896	-1.15979	0.246133	0.526852	1086.27	2263.42	2560.31	349.541	1515.74	1523.84
146	hsa_piR_020450|gb|DQ598104|Homo	1300.44	-0.777713	0.670577	-1.15977	0.246144	0.526852	972.303	1671.06	2283.29	458.415	652.266	1765.32
142	hsa_piR_007540|gb|DQ580277|Homo	48.9132	1.51377	1.3088	1.1566	0.247435	0.526852	0	49.6946	26.2327	35.8137	77.6507	104.087
148	hsa_piR_022628|gb|DQ600952|Homo	191.643	-0.707415	0.613905	-1.15232	0.249189	0.527001	349.032	199.441	165.266	80.2226	210.175	145.722
149	hsa_piR_016828|gb|DQ593158|Homo	251.847	0.556849	0.48539	1.14722	0.251291	0.52788	160.27	198.778	251.833	214.882	310.603	374.715
151	hsa_piR_014620|gb|DQ590013|Homo	269.931	-0.688156	0.622482	-1.1055	0.268941	0.558111	254.651	162.998	581.316	187.664	203.962	228.992
152	hsa_piR_020541|gb|DQ598252|Homo	1026.58	0.875101	0.79306	1.10345	0.269832	0.558111	1004.36	639.404	529.375	2166.01	227.775	1592.54
150	hsa_piR_004735|gb|DQ576498|Homo	138.656	-0.586307	0.532672	-1.10069	0.271031	0.558111	162.05	111.978	225.076	130.362	94.2162	108.251
154	hsa_piR_014636|gb|DQ590030|Homo	431105	0.460429	0.426378	1.07986	0.280204	0.569831	270455	378375	439843	400325	490597	607038
153	hsa_piR_004918|gb|DQ576766|Homo	21337.2	0.510917	0.47329	1.0795	0.280364	0.569831	11993.5	16065.3	24734.8	19296.4	27892.1	28041.2
156	hsa_piR_017033|gb|DQ593538|Homo	1388.36	-0.628939	0.586327	-1.07268	0.283417	0.570469	2265.15	1710.16	1083.41	1697.57	572.544	1001.32
155	hsa_piR_005337|gb|DQ577347|Homo	314551	0.546846	0.510756	1.07066	0.284323	0.570469	272031	236175	258717	334013	574367	212005
157	hsa_piR_002528|gb|DQ573413|Homo	16036.5	-0.49057	0.464799	-1.05545	0.291221	0.58015	15660.1	17480.6	23069	12597.8	9104.8	18306.9
158	hsa_piR_007979|gb|DQ580854|Homo	40.9075	-0.9695	0.921684	-1.05188	0.292855	0.58015	57.8752	40.4183	63.483	5.73019	23.8129	54.1255
159	hsa_piR_003759|gb|DQ575105|Homo	27.2243	1.44293	1.47562	0.977843	0.328152	0.645985	32.0539	11.9267	0	25.7858	18.6362	74.943
160	hsa_piR_007832|gb|DQ580660|Homo	1261.72	-0.514348	0.543897	-0.945672	0.344316	0.673568	1781.67	1210.56	1460.63	498.526	1351.12	1267.79
161	hsa_piR_000586|gb|DQ570728|Homo	2909.86	0.681061	0.724527	0.940008	0.347213	0.675018	3368.34	2124.28	1214.05	6622.66	1236.2	2893.63
162	hsa_piR_011374|gb|DQ585363|Homo	159.04	0.776115	0.840269	0.923651	0.355668	0.687186	112.189	129.868	110.177	340.946	231.917	29.1445
163	hsa_piR_003832|gb|DQ575213|Homo	1131.87	-0.503436	0.548256	-0.91825	0.358488	0.688385	865.456	1502.76	1614.88	1044.33	1257.94	505.865
164	hsa_piR_020490|gb|DQ598167|Homo	533.645	-0.500083	0.547271	-0.913776	0.360835	0.688666	657.106	495.621	721.923	240.668	412.066	674.487
165	hsa_piR_004800|gb|DQ576604|Homo	32.7119	0.731595	0.806316	0.907331	0.364232	0.690937	37.3963	15.9023	20.9861	28.6509	64.1912	29.1445
166	hsa_piR_020786|gb|DQ598612|Homo	206.498	-0.662682	0.742071	-0.893016	0.371848	0.701136	214.583	392.918	151.1	54.4368	151.16	274.791
167	hsa_piR_000848|gb|DQ571067|Homo	137.089	0.544966	0.620632	0.878082	0.379899	0.702306	184.31	89.4502	61.3844	141.822	195.68	149.886
170	hsa_piR_013353|gb|DQ588104|Homo	28.4279	-0.657376	0.749665	-0.876893	0.380545	0.702306	35.6155	45.0564	23.6094	25.7858	17.6008	22.8992
168	hsa_piR_002622|gb|DQ573540|Homo	55.2078	0.5345	0.610422	0.875623	0.381235	0.702306	53.4232	31.8045	50.3667	77.3575	68.3326	49.962
169	hsa_piR_011094|gb|DQ584967|Homo	1069.42	-0.727006	0.830638	-0.875238	0.381444	0.702306	1196.68	1038.95	1762.83	320.89	231.917	1865.25
171	hsa_piR_004962|gb|DQ576828|Homo	75.014	-0.534362	0.614426	-0.869693	0.384468	0.703735	58.7656	73.548	133.787	68.7622	59.0145	56.2072
172	hsa_piR_014632|gb|DQ590026|Homo	257.421	-0.684966	0.798383	-0.857942	0.390925	0.711392	293.828	109.328	548.262	78.7901	170.832	343.489
173	hsa_piR_014628|gb|DQ590022|Homo	491.943	-2.40336	2.83494	-0.847764	0.39657	0.717493	806.691	1200.62	475.336	0	469.01	0
175	hsa_piR_021650|gb|DQ599684|Homo	518.428	-0.537555	0.643063	-0.83593	0.403194	0.724092	527.109	539.352	776.486	424.034	689.538	154.049
174	hsa_piR_017061|gb|DQ593574|Homo	41.7494	-0.564048	0.677127	-0.833002	0.404844	0.724092	63.2175	49.6946	36.7257	45.8415	27.9542	27.0627
176	hsa_piR_000805|gb|DQ571003|Homo	2075.22	-0.375437	0.454065	-0.826834	0.408331	0.726179	1955.29	3164.55	1911.84	2223.31	1789.07	1407.26
177	hsa_piR_020492|gb|DQ598170|Homo	392.783	-0.541523	0.658288	-0.822622	0.410723	0.726306	407.797	598.985	389.293	116.036	307.497	537.091
179	hsa_piR_010862|gb|DQ584649|Homo	11754.6	0.417503	0.52048	0.80215	0.422466	0.739124	11256.3	13932.4	5008.34	14845.5	13400.4	12084.6
178	hsa_piR_009901|gb|DQ583332|Homo	36010.5	0.303406	0.378427	0.801756	0.422694	0.739124	39773.6	29598.1	27342.3	40528.2	41623.9	37196.7
181	hsa_piR_005264|gb|DQ577247|Homo	20.5331	-0.725992	0.914291	-0.794049	0.427167	0.740647	16.9174	29.8167	29.9052	25.7858	8.28274	12.4905
180	hsa_piR_001152|gb|DQ571500|Homo	147.658	-0.444758	0.561487	-0.792108	0.428298	0.740647	247.528	137.157	126.441	166.175	106.64	102.006
182	hsa_piR_014627|gb|DQ590021|Homo	468.308	-2.25823	2.88735	-0.78211	0.43415	0.743109	835.183	1243.03	246.062	0	485.576	0
183	hsa_piR_019050|gb|DQ596155|Homo	25.9681	0.66979	0.856985	0.781566	0.43447	0.743109	28.4924	17.2275	14.1656	20.0557	21.7422	54.1255
184	hsa_piR_001040|gb|DQ571333|Homo	18.9375	-0.734251	0.956002	-0.768043	0.442461	0.750863	24.9308	17.2275	28.3313	5.73019	12.4241	24.981
185	hsa_piR_007336|gb|DQ580006|Homo	71.0805	0.457582	0.597528	0.765791	0.443801	0.750863	56.0944	71.5602	51.9406	116.036	55.9085	74.943
187	hsa_piR_016946|gb|DQ593358|Homo	63.2832	-0.631108	0.832831	-0.757787	0.448579	0.752372	115.75	46.3816	68.2049	14.3255	51.7671	83.27
186	hsa_piR_014817|gb|DQ590275|Homo	105.48	0.642869	0.850077	0.756249	0.4495	0.752372	160.27	39.7557	47.2188	42.9764	155.301	187.357
188	hsa_piR_014959|gb|DQ590455|Homo	3464.26	0.38611	0.514364	0.750655	0.45286	0.753964	3572.23	2931.98	2507.32	4310.53	5375.5	2088
190	hsa_piR_019324|gb|DQ596538|Homo	36.1486	-0.600905	0.81063	-0.741281	0.458523	0.7567	50.7521	26.5038	52.99	12.8929	27.9542	45.7985
189	hsa_piR_002286|gb|DQ573083|Homo	16683.5	0.450591	0.608959	0.739936	0.459339	0.7567	19417.6	17524.3	5355.66	13958.7	19696.4	24148.3
191	hsa_piR_019949|gb|DQ597397|Homo	100.442	0.504693	0.693129	0.728138	0.466529	0.764522	138.9	78.1861	32.5285	106.008	130.453	116.578
192	hsa_piR_020365|gb|DQ597975|Homo	2609.18	-0.303229	0.421216	-0.719889	0.471593	0.768795	3371.01	2897.53	2378.78	3001.18	1897.78	2108.81
194	hsa_piR_017848|gb|DQ594634|Homo	1243.14	-0.370112	0.541874	-0.683023	0.494592	0.800117	1234.97	2128.25	842.593	1359.49	1133.7	759.839
193	hsa_piR_003676|gb|DQ574995|Homo	4843.59	0.39812	0.584675	0.680925	0.495919	0.800117	3143.96	4679.24	4715.58	9196.95	4652.83	2672.97
195	hsa_piR_020828|gb|DQ598675|Homo	453.323	-0.476471	0.706671	-0.674247	0.500154	0.802812	908.195	414.784	260.228	634.618	312.673	189.439
197	hsa_piR_013856|gb|DQ588926|Homo	27.6103	0.950111	1.45107	0.654768	0.512617	0.81745	10.6846	39.7557	6.29584	34.3811	74.5447	0
198	hsa_piR_023244|gb|DQ601792|Homo	22836.1	-0.361578	0.556398	-0.649855	0.515786	0.81745	20893.8	23322.7	32830.7	11205.4	16196.9	32566.9
196	hsa_piR_000203|gb|DQ570215|Homo	85.8564	-0.513326	0.792404	-0.647809	0.517109	0.81745	107.737	138.482	57.7118	63.032	125.276	22.8992
199	hsa_piR_007812|gb|DQ580637|Homo	520.325	0.506068	0.802038	0.630977	0.528055	0.823582	753.268	93.4258	443.856	807.956	729.916	293.527
200	hsa_piR_017104|gb|DQ593636|Homo	75.0686	0.342486	0.543851	0.629742	0.528863	0.823582	68.5598	76.1984	53.5146	85.9528	66.2619	99.924
201	hsa_piR_019825|gb|DQ597218|Homo	17752.2	0.493154	0.783139	0.629714	0.528882	0.823582	8542.38	27893.2	7806.84	34845.3	21097.2	6328.52
202	hsa_piR_022295|gb|DQ600514|Homo	12528.5	-0.320955	0.519919	-0.617317	0.537025	0.832124	11657	18072.3	12020.3	6251.63	15813.8	11355.9
203	hsa_piR_017178|gb|DQ593744|Homo	260.572	0.332313	0.550876	0.603244	0.546346	0.839479	215.474	310.757	165.266	190.529	262.977	418.432
204	hsa_piR_020495|gb|DQ598174|Homo	191.407	0.834367	1.38586	0.602057	0.547136	0.839479	219.035	0	193.597	352.406	127.347	256.055
205	hsa_piR_017318|gb|DQ593939|Homo	22.2394	0.495632	0.83185	0.595819	0.551296	0.841735	12.4654	25.1786	17.8382	34.3811	26.9189	16.654
212	hsa_piR_011370|gb|DQ585359|Homo	85.4557	0.318586	0.544591	0.585002	0.558547	0.844426	71.231	72.8854	83.9445	128.929	72.474	83.27
210	hsa_piR_008112|gb|DQ581031|Homo	23429.1	-0.310627	0.53757	-0.577834	0.563376	0.844426	38159.3	23609.6	16055.4	22137.1	13441.9	27171
208	hsa_piR_003675|gb|DQ574994|Homo	251.124	-1.59363	2.78195	-0.572846	0.566749	0.844426	322.32	239.859	569.773	0	374.794	0
209	hsa_piR_004506|gb|DQ576200|Homo	21.0621	0.571663	1.00323	0.569824	0.568797	0.844426	24.0405	9.93892	17.3135	12.8929	49.6964	12.4905
211	hsa_piR_010402|gb|DQ584003|Homo	3287.63	-0.366986	0.645916	-0.568164	0.569924	0.844426	1638.31	2895.54	6576.53	1812.17	3691	3112.22
213	hsa_piR_016552|gb|DQ592795|Homo	177.344	0.820348	1.46129	0.561386	0.574535	0.844426	138.9	0	245.538	111.739	80.7567	487.129
206	hsa_piR_003672|gb|DQ574991|Homo	1257.19	0.335342	0.598511	0.560294	0.575279	0.844426	801.349	1590.23	944.375	1719.06	1863.62	624.525
214	hsa_piR_017383|gb|DQ594028|Homo	35.3897	0.804175	1.44533	0.556395	0.577941	0.844426	46.3001	17.2275	13.641	0	26.9189	108.251
216	hsa_piR_020362|gb|DQ597968|Homo	30.5726	0.610446	1.09878	0.555568	0.578506	0.844426	32.0539	3.97557	36.2011	30.0835	12.4241	68.6977
215	hsa_piR_019824|gb|DQ597217|Homo	35.7303	0.391536	0.716993	0.54608	0.585011	0.844426	24.9308	23.8534	44.0709	34.3811	53.8378	33.308
207	hsa_piR_003674|gb|DQ574993|Homo	6597.05	-1.17957	2.16071	-0.545918	0.585123	0.844426	11069.3	8237.37	8153.11	8904.71	3217.84	0
217	hsa_piR_020363|gb|DQ597970|Homo	20.2069	0.63868	1.17089	0.545467	0.585433	0.844426	21.3693	2.65038	23.0847	20.0557	8.28274	45.7985
319	hsa_piR_013393|gb|DQ588158|Homo	15.618	-0.471735	0.876181	-0.538399	0.590302	NA	20.4789	14.5771	19.4122	14.3255	12.4241	12.4905
218	hsa_piR_002442|gb|DQ573294|Homo	128.15	1.47449	2.74123	0.537892	0.590652	0.847378	0	133.181	70.3035	287.942	277.472	0
219	hsa_piR_009584|gb|DQ582929|Homo	31.2016	-0.745462	1.4123	-0.527834	0.597615	0.847378	53.4232	53.0075	10.4931	28.6509	0	41.635
220	hsa_piR_013745|gb|DQ588779|Homo	476071	0.235292	0.448586	0.524521	0.599916	0.847378	529323	362703	419983	463758	700813	379849
224	hsa_piR_019485|gb|DQ596756|Homo	1405.29	-0.326373	0.625487	-0.521791	0.601816	0.847378	1853.79	1379.52	1456.44	497.094	1077.79	2167.1
317	hsa_piR_012925|gb|DQ587514|Homo	8.73458	0.822228	1.57579	0.521789	0.601817	NA	10.6846	5.30075	3.14792	22.9207	10.3534	0
222	hsa_piR_018735|gb|DQ595749|Homo	396.201	-0.249949	0.481676	-0.518915	0.60382	0.847378	448.755	556.579	286.461	300.835	434.844	349.734
225	hsa_piR_020381|gb|DQ597997|Homo	888.236	-0.333656	0.644062	-0.518049	0.604424	0.847378	1191.34	872.637	906.6	292.239	692.644	1373.95
223	hsa_piR_019179|gb|DQ596327|Homo	10104.2	0.260334	0.5076	0.512871	0.608041	0.847378	5796.42	7394.55	14393.9	11324.3	12035.9	9680.14
226	hsa_piR_020809|gb|DQ598639|Homo	233.212	0.384809	0.752993	0.511039	0.609324	0.847378	296.499	83.4869	226.65	399.68	93.1808	299.772
221	hsa_piR_016240|gb|DQ592148|Homo	233.45	0.381314	0.751442	0.507442	0.611845	0.847378	288.485	83.4869	236.094	399.68	93.1808	299.772
233	hsa_piR_020097|gb|DQ597608|Homo	2137.98	-1.07609	2.22067	-0.484578	0.627975	0.856223	2357.75	438.637	5904.45	0	1370.79	2756.24
227	hsa_piR_000560|gb|DQ570698|Homo	244.635	-0.234091	0.485828	-0.48184	0.62992	0.856223	354.374	262.387	176.808	239.235	210.175	224.829
229	hsa_piR_003817|gb|DQ575190|Homo	78.7127	-0.356276	0.747153	-0.476845	0.633473	0.856223	49.8617	45.0564	169.988	74.4924	66.2619	66.616
232	hsa_piR_019676|gb|DQ596993|Homo	561.885	-0.312138	0.654691	-0.476771	0.633525	0.856223	880.593	690.423	296.429	819.417	278.507	405.941
230	hsa_piR_004920|gb|DQ576768|Homo	92.6543	0.326161	0.690006	0.472693	0.636432	0.856223	35.6155	84.8121	125.917	68.7622	124.241	116.578
228	hsa_piR_000799|gb|DQ570997|Homo	79.6987	-0.327617	0.69427	-0.471887	0.637008	0.856223	56.0944	74.2106	135.885	110.306	57.9792	43.7167
231	hsa_piR_004921|gb|DQ576769|Homo	51.4449	0.344277	0.730383	0.471365	0.63738	0.856223	21.3693	45.0564	69.2542	40.1113	66.2619	66.616
234	hsa_piR_020364|gb|DQ597971|Homo	132.12	0.443134	0.950474	0.466225	0.641055	0.857479	149.585	15.9023	169.988	120.334	62.1206	274.791
323	hsa_piR_018430|gb|DQ595353|Homo	13.5185	0.449966	0.972348	0.462763	0.643534	NA	9.79426	10.6015	13.641	20.0557	8.28274	18.7357
235	hsa_piR_008547|gb|DQ581601|Homo	38.5914	0.57954	1.27524	0.454454	0.649502	0.863564	29.3828	29.1542	34.6271	47.274	91.1101	0
236	hsa_piR_019951|gb|DQ597403|Homo	44.9791	0.275639	0.609546	0.452204	0.651122	0.863564	43.629	41.7434	36.7257	61.5995	40.3784	45.7985
237	hsa_piR_014626|gb|DQ590020|Homo	62426.1	0.196186	0.438714	0.447185	0.654741	0.864701	74317.1	49159.2	51089.1	79712.6	72013.2	48265.4
238	hsa_piR_019420|gb|DQ596670|Homo	813.558	-0.196463	0.45953	-0.42753	0.668993	0.879811	584.984	904.441	1116.99	906.802	699.892	668.242
239	hsa_piR_008113|gb|DQ581032|Homo	165369	-0.176548	0.426747	-0.413706	0.679089	0.889351	196355	199862	130208	188930	155058	121801
245	hsa_piR_018780|gb|DQ595807|Homo	2030.28	-0.254146	0.636942	-0.399009	0.689886	0.890585	3110.12	2295.89	1219.29	2239.07	771.33	2545.98
244	hsa_piR_013755|gb|DQ588793|Homo	441.008	-0.16933	0.430604	-0.393239	0.694143	0.890585	436.29	487.007	477.434	300.835	507.318	437.167
243	hsa_piR_011186|gb|DQ585093|Homo	623357	0.204711	0.521075	0.392862	0.694421	0.890585	444139	661025	632455	774125	882261	346137
242	hsa_piR_009895|gb|DQ583325|Homo	28123	0.186182	0.475783	0.391317	0.695563	0.890585	35964.5	26763.5	16205.5	30633.6	34439.6	24731.2
246	hsa_piR_019521|gb|DQ596805|Homo	16.8065	-0.394391	1.01546	-0.388387	0.697729	0.890585	19.5885	7.95113	29.3806	8.59528	12.4241	22.8992
241	hsa_piR_007489|gb|DQ580213|Homo	46.8071	-0.278009	0.720388	-0.385916	0.699559	0.890585	49.8617	74.2106	29.3806	40.1113	28.9896	58.289
240	hsa_piR_000441|gb|DQ570540|Homo	104.448	-0.293742	0.762193	-0.38539	0.699948	0.890585	158.489	103.365	82.8952	144.687	26.9189	110.333
316	hsa_piR_009051|gb|DQ582264|Homo	11.8347	-0.443162	1.15018	-0.385299	0.700016	NA	7.1231	13.9145	19.9368	18.6231	7.2474	4.1635
250	hsa_piR_016796|gb|DQ593114|Homo	4474.07	0.223872	0.613172	0.365105	0.715033	0.900277	1701.53	4522.21	6158.9	3128.68	6218.27	5114.86
253	hsa_piR_019565|gb|DQ596854|Homo	193.085	-0.24462	0.675257	-0.362263	0.717156	0.900277	216.364	214.681	198.319	193.394	279.542	56.2072
252	hsa_piR_019557|gb|DQ596845|Homo	508.452	0.173747	0.485329	0.357999	0.720344	0.900277	456.769	339.911	637.453	580.181	642.948	393.451
249	hsa_piR_005023|gb|DQ576923|Homo	632.866	0.170236	0.486069	0.350231	0.726165	0.900277	680.256	506.222	601.252	820.849	791.002	397.614
247	hsa_piR_001207|gb|DQ571591|Homo	98.4151	0.243667	0.704253	0.345993	0.729348	0.900277	97.0522	126.556	46.1695	81.6551	64.1912	174.867
248	hsa_piR_004262|gb|DQ575814|Homo	35.3543	-0.242514	0.701036	-0.345936	0.729391	0.900277	29.3828	31.8045	53.5146	25.7858	34.1663	37.4715
254	hsa_piR_020793|gb|DQ598619|Homo	27.9215	0.270158	0.782874	0.345085	0.730031	0.900277	18.6981	27.829	28.8559	21.4882	22.7775	47.8802
251	hsa_piR_019544|gb|DQ596830|Homo	1.1255e+06	0.115787	0.336241	0.344359	0.730577	0.900277	1.06824e+06	1.13031e+06	1.04253e+06	1.23531e+06	1.18392e+06	1.09269e+06
258	hsa_piR_018165|gb|DQ595023|Homo	23.6038	-0.326136	0.987288	-0.330335	0.741147	0.906323	45.4098	19.2152	14.1656	35.8137	8.28274	18.7357
256	hsa_piR_008982|gb|DQ582174|Homo	620.936	-0.259623	0.789712	-0.328757	0.742339	0.906323	334.786	560.555	1134.3	134.659	778.578	782.738
255	hsa_piR_007411|gb|DQ580097|Homo	37882.5	-0.774637	2.38836	-0.324338	0.745682	0.906323	55951	35688.7	51807.9	0	46471.3	37375.7
257	hsa_piR_011181|gb|DQ585088|Homo	33.7051	0.300683	0.932314	0.322512	0.747065	0.906323	53.4232	26.5038	10.4931	28.6509	20.7069	62.4525
262	hsa_piR_022421|gb|DQ600670|Homo	2889.62	-0.133081	0.427097	-0.311593	0.75535	0.907393	2524.25	2852.47	3690.93	2055.7	2862.72	3351.62
261	hsa_piR_011187|gb|DQ585094|Homo	1.1587e+06	-0.173426	0.559527	-0.309952	0.756598	0.907393	644120	1.02051e+06	2.02014e+06	1.13662e+06	1.25636e+06	874435
259	hsa_piR_001386|gb|DQ571911|Homo	502.552	-0.962524	3.12686	-0.307824	0.758216	0.907393	0	771.26	1221.39	416.871	0	605.789
260	hsa_piR_005271|gb|DQ577259|Homo	18.0012	0.269316	0.879887	0.30608	0.759543	0.907393	11.575	21.8656	15.7396	21.4882	24.8482	12.4905
263	hsa_piR_019308|gb|DQ596516|Homo	717.264	-0.160255	0.531746	-0.301375	0.763128	0.90821	694.502	895.828	682.049	521.447	1076.76	433.004
265	hsa_piR_013817|gb|DQ588873|Homo	73.2941	0.223814	0.755437	0.296271	0.767023	0.90847	49.8617	102.04	51.416	120.334	86.9688	29.1445
264	hsa_piR_001205|gb|DQ571589|Homo	72.2262	-0.178771	0.609133	-0.293484	0.769152	0.90847	112.189	51.6824	66.1063	67.3297	56.9438	79.1065
266	hsa_piR_000045|gb|DQ569993|Homo	31.5645	-0.218537	0.77374	-0.282442	0.777604	0.915001	48.0809	27.829	25.708	35.8137	16.5655	35.3897
267	hsa_piR_022298|gb|DQ600517|Homo	203.678	0.129091	0.465986	0.277028	0.781758	0.916443	227.939	137.82	218.256	206.287	231.917	199.848
268	hsa_piR_018716|gb|DQ595728|Homo	25.0067	-0.346215	1.27978	-0.270526	0.786755	0.91886	29.3828	14.5771	40.3983	31.516	34.1663	0
269	hsa_piR_018800|gb|DQ595833|Homo	10652	0.121824	0.468511	0.260023	0.794846	0.924858	6363.6	13530.2	10713.4	13163.7	9513.76	10627.3
272	hsa_piR_019497|gb|DQ596772|Homo	92.0422	0.227413	0.924782	0.245909	0.805752	0.925518	96.1618	93.4258	64.0077	45.8415	21.7422	231.074
271	hsa_piR_017094|gb|DQ593621|Homo	31055.9	0.164164	0.667807	0.245826	0.805817	0.925518	10716.7	31899.9	45255.5	17242.1	39461	41759.9
270	hsa_piR_013704|gb|DQ588717|Homo	67.1561	0.151007	0.618496	0.244152	0.807113	0.925518	37.3963	87.4625	66.1063	68.7622	80.7567	62.4525
273	hsa_piR_020619|gb|DQ598378|Homo	473.138	0.16801	0.688604	0.243987	0.807241	0.925518	542.246	365.089	429.166	141.822	569.438	791.065
275	hsa_piR_016984|gb|DQ593431|Homo	125.898	-0.167141	0.714351	-0.233976	0.815003	0.930532	256.432	77.5235	66.1063	103.143	139.771	112.414
274	hsa_piR_015186|gb|DQ590750|Homo	92.5599	0.209877	0.925141	0.226859	0.820533	0.930532	97.9426	94.751	64.0077	45.8415	21.7422	231.074
276	hsa_piR_021987|gb|DQ600117|Homo	92.5599	0.209877	0.925141	0.226859	0.820533	0.930532	97.9426	94.751	64.0077	45.8415	21.7422	231.074
277	hsa_piR_008562|gb|DQ581620|Homo	1066.48	-0.829891	3.72519	-0.222778	0.823708	0.930761	1431.74	2663.63	0	2303.53	0	0
279	hsa_piR_011188|gb|DQ585095|Homo	1.05803e+06	-0.0913934	0.502579	-0.181849	0.855701	0.958587	807118	763299	1.70419e+06	1.05509e+06	1.15359e+06	864905
286	hsa_piR_019607|gb|DQ596908|Homo	52.0958	0.1652	0.921527	0.179268	0.857728	0.958587	15.1366	33.7923	98.1101	24.3533	70.4033	70.7795
282	hsa_piR_015150|gb|DQ590704|Homo	3.4328e+06	-0.0931747	0.536047	-0.173818	0.862008	0.958587	2.21504e+06	2.80831e+06	5.6075e+06	2.50785e+06	4.19735e+06	3.26074e+06
284	hsa_piR_015875|gb|DQ591696|Homo	141.541	0.232731	1.35483	0.171779	0.863611	0.958587	153.147	56.9831	180.481	369.597	89.0395	0
285	hsa_piR_018145|gb|DQ594989|Homo	2831.79	-0.586924	3.42583	-0.171323	0.86397	0.958587	2904.44	2161.38	5134.25	0	0	6790.67
280	hsa_piR_012734|gb|DQ587229|Homo	39.2887	-0.118863	0.71461	-0.166332	0.867895	0.958587	34.7251	29.8167	58.2365	25.7858	49.6964	37.4715
278	hsa_piR_001511|gb|DQ572064|Homo	157.426	-0.202024	1.25686	-0.160738	0.8723	0.958587	231.501	137.82	136.41	223.477	215.351	0
281	hsa_piR_013194|gb|DQ587886|Homo	340.972	-0.0738013	0.466152	-0.15832	0.874205	0.958587	370.401	360.451	318.989	240.668	455.551	299.772
283	hsa_piR_015151|gb|DQ590705|Homo	224.424	0.100162	0.643668	0.155611	0.87634	0.958587	107.737	218.656	323.186	126.064	296.108	274.791
287	hsa_piR_022017|gb|DQ600174|Homo	926.525	0.06832	0.451977	0.151158	0.879851	0.958587	1009.7	751.382	953.819	902.504	1267.26	674.487
288	hsa_piR_022315|gb|DQ600539|Homo	47.7245	-0.134426	0.905802	-0.148405	0.882023	0.958587	24.9308	37.1053	88.1417	20.0557	86.9688	29.1445
289	hsa_piR_001042|gb|DQ571335|Homo	29.6548	0.0988654	0.691932	0.142883	0.886383	0.959992	26.7116	33.1297	26.2327	35.8137	31.0603	24.981
291	hsa_piR_022294|gb|DQ600513|Homo	134.693	0.0851622	0.630229	0.135129	0.89251	0.96021	182.529	81.4991	129.065	117.469	212.245	85.3517
290	hsa_piR_020008|gb|DQ597482|Homo	105.97	0.0755714	0.56035	0.134865	0.892719	0.96021	136.229	61.6213	111.751	98.8457	108.711	118.66
295	hsa_piR_012174|gb|DQ586451|Homo	684.508	-0.172572	1.39315	-0.123871	0.901417	0.960911	828.06	616.213	731.891	0	962.869	968.014
296	hsa_piR_014879|gb|DQ590348|Homo	252037	0.0581523	0.471967	0.123213	0.901939	0.960911	247243	190122	303512	324861	282702	163784
297	hsa_piR_017184|gb|DQ593752|Homo	19.8076	-0.11608	1.00336	-0.115692	0.907897	0.960911	36.5059	17.2275	8.39445	10.0278	27.9542	18.7357
293	hsa_piR_004923|gb|DQ576771|Homo	57.155	0.102996	0.909988	0.113184	0.909885	0.960911	24.0405	41.7434	99.1594	103.143	18.6362	56.2072
292	hsa_piR_004337|gb|DQ575973|Homo	84.758	0.147891	1.32007	0.112033	0.910798	0.960911	138.9	34.4549	68.2049	186.231	80.7567	0
294	hsa_piR_008983|gb|DQ582175|Homo	248743	-0.0568227	0.512935	-0.11078	0.911791	0.960911	211930	157711	391284	204585	295719	231232
298	hsa_piR_010791|gb|DQ584559|Homo	867.063	-0.0596432	0.578318	-0.103132	0.917858	0.964059	1081.82	1019.73	552.46	696.218	503.176	1348.97
318	hsa_piR_013359|gb|DQ588112|Homo	15.1948	-0.110112	1.09006	-0.101015	0.919539	NA	10.6846	10.6015	26.2327	22.9207	16.5655	4.1635
299	hsa_piR_020851|gb|DQ598705|Homo	36.5422	0.0881391	0.911853	0.0966593	0.922997	0.966214	12.4654	46.3816	47.7434	40.1113	57.9792	14.5722
300	hsa_piR_008921|gb|DQ582102|Homo	17228.2	-0.0473529	0.526405	-0.0899553	0.928323	0.96855	13194.6	18235.3	21103.1	9098.1	24110	17628.3
301	hsa_piR_022296|gb|DQ600515|Homo	789765	-0.0368953	0.432075	-0.0853909	0.931951	0.969105	642336	794329	962926	699103	1.02151e+06	618388
302	hsa_piR_020466|gb|DQ598130|Homo	179.294	-0.0925443	1.16362	-0.0795315	0.93661	0.970725	344.58	196.791	14.1656	371.03	128.382	20.8175
314	hsa_piR_001168|gb|DQ571524|Homo	15.4184	-0.0894891	1.44694	-0.061847	0.950685	NA	24.9308	4.63816	18.3629	30.0835	14.4948	0
308	hsa_piR_017858|gb|DQ594648|Homo	31.4326	-0.0911486	2.34467	-0.0388748	0.96899	0.991875	39.177	58.3083	0	0	91.1101	0
303	hsa_piR_002515|gb|DQ573393|Homo	30.7182	-0.0910091	2.34661	-0.0387832	0.969063	0.991875	38.2867	56.9831	0	0	89.0395	0
305	hsa_piR_007525|gb|DQ580257|Homo	278.343	-0.117054	3.07027	-0.0381251	0.969588	0.991875	0	151.072	717.725	326.621	0	474.639
307	hsa_piR_012753|gb|DQ587269|Homo	41.045	0.0236505	0.734297	0.0322084	0.974306	0.991875	42.7386	49.6946	29.3806	55.8693	20.7069	47.8802
304	hsa_piR_006465|gb|DQ578832|Homo	513317	-0.0149656	0.464689	-0.0322056	0.974308	0.991875	632553	418420	496968	358085	708290	465588
306	hsa_piR_007661|gb|DQ580441|Homo	439.028	0.0925341	3.07971	0.0300463	0.97603	0.991875	0	257.087	1017.83	555.828	803.426	0
309	hsa_piR_002852|gb|DQ573835|Homo	484.19	-0.0133654	0.550078	-0.0242973	0.980615	0.99331	439.851	302.143	717.725	381.057	668.831	395.532
310	hsa_piR_013306|gb|DQ588040|Homo	61.9004	-0.012512	0.725567	-0.0172444	0.986242	0.993526	56.0944	74.8732	55.6132	22.9207	89.0395	72.8612
312	hsa_piR_020485|gb|DQ598159|Homo	22292.8	0.00890125	0.620925	0.0143355	0.988562	0.993526	27006.3	12212.3	27452.5	18752	11363.9	36969.8
311	hsa_piR_019723|gb|DQ597069|Homo	38.3523	-0.00994267	0.822258	-0.0120919	0.990352	0.993526	45.4098	21.8656	48.7927	30.0835	65.2266	18.7357
313	hsa_piR_009154|gb|DQ582400|Homo	4984.2	0.00107704	0.377123	0.00285593	0.997721	0.997721	5305.82	5277.56	4364.59	4733.13	5925.27	4298.81
315	hsa_piR_002580|gb|DQ573482|Homo	217.838	0.709884	3.16729	0.22413	NA	NA	0	0	495.797	90.2504	65.2266	655.751
320	hsa_piR_013458|gb|DQ588249|Homo	2070.31	-0.988635	3.29023	-0.300476	NA	NA	1193.12	3551.51	3515.18	0	4162.08	0
321	hsa_piR_013588|gb|DQ588538|Homo	1355.02	-0.782221	3.72514	-0.209985	NA	NA	5141.1	0	0	0	2989.03	0
322	hsa_piR_017791|gb|DQ594556|Homo	224.377	3.57833	1.01654	3.52009	NA	NA	50.7521	29.1542	24.134	75.925	98.3575	1067.94

## Sheet: Sheet 2
OVARY: SBT VS BSC
Column1	Gene	baseMean	log2FoldChange	lfcSE	stat	pvalue	padj	s6	s8	s30	s2	s4	s10
1	hsa_piR_016745|gb|DQ593052|Homo	271.92	1.54909	0.279476	5.54281	2.97652e-08	8.3045e-06	140.771	119.647	155.006	444.828	400.192	371.073
2	hsa_piR_017723|gb|DQ594464|Homo	560.056	1.6854	0.315616	5.34002	9.2938e-08	1.29648e-05	272.341	240.693	284.177	1093.17	810.266	659.686
3	hsa_piR_004152|gb|DQ575658|Homo	220.31	1.38211	0.273773	5.04838	4.45574e-07	4.14384e-05	110.408	123.845	131.863	294.614	316.201	344.927
4	hsa_piR_020829|gb|DQ598677|Homo	36024	2.89966	0.617578	4.69521	2.66334e-06	0.000185768	5730.19	15595.4	4215.83	91391.4	65063.4	34147.8
6	hsa_piR_018849|gb|DQ595899|Homo	124.175	4.27479	0.980457	4.36	1.30062e-05	0.000701964	10.1208	14.6935	11.8407	246.158	19.7626	442.472
5	hsa_piR_004307|gb|DQ575881|Homo	661.108	1.89863	0.438757	4.32728	1.5096e-05	0.000701964	309.143	288.972	241.12	1533.16	1002.95	591.304
7	hsa_piR_017724|gb|DQ594465|Homo	1159.53	1.84137	0.439706	4.18773	2.81758e-05	0.00112301	571.363	535.263	411.734	2695.14	1711.93	1031.76
8	hsa_piR_004308|gb|DQ575882|Homo	893.067	1.79212	0.447652	4.00338	6.2443e-05	0.0021777	463.715	403.021	334.231	2040.98	1356.21	760.247
9	hsa_piR_014629|gb|DQ590023|Homo	168999	2.02375	0.538171	3.76042	0.000169629	0.00506085	69964.9	72086.2	58090.6	427907	284806	101138
10	hsa_piR_015026|gb|DQ590548|Homo	2059.81	0.980564	0.26193	3.74361	0.000181393	0.00506085	1531.92	1294.43	1332.08	3362.86	2383.86	2453.71
11	hsa_piR_004309|gb|DQ575884|Homo	97.9306	1.90457	0.538697	3.53551	0.000406982	0.0103225	47.8436	41.2817	34.9839	224.837	153.16	85.4776
12	hsa_piR_019914|gb|DQ597347|Homo	16615.8	1.96218	0.569957	3.44268	0.000575989	0.0133917	6652.1	10495.3	3213.14	36156.1	29777.3	13400.9
13	hsa_piR_003832|gb|DQ575213|Homo	990.368	-1.19778	0.380892	-3.14467	0.00166273	0.0356848	894.308	1586.9	1656.62	470.995	600.289	733.096
14	hsa_piR_010431|gb|DQ584049|Homo	2493.8	-1.51369	0.499228	-3.03206	0.00242894	0.0484054	5575.62	3631.39	1872.99	1221.1	1741.58	920.141
15	hsa_piR_000823|gb|DQ571031|Homo	1165.11	1.41963	0.471947	3.00804	0.0026294	0.0489069	537.321	901.9	462.864	2340.44	1773.69	974.444
17	hsa_piR_016984|gb|DQ593431|Homo	83.2648	-2.27511	0.792303	-2.87152	0.00408507	0.0687678	264.98	81.8637	67.815	17.4442	22.2329	45.2528
16	hsa_piR_005799|gb|DQ577967|Homo	1529.72	-1.30367	0.456312	-2.85697	0.00427702	0.0687678	1730.65	1528.82	3272.34	589.228	891.787	1165.51
18	hsa_piR_020548|gb|DQ598263|Homo	7594.05	-0.876295	0.307977	-2.84532	0.00443663	0.0687678	8907.2	12532.1	8054.38	5499.78	6237.57	4333.21
20	hsa_piR_020326|gb|DQ597916|Homo	603769	1.77659	0.644041	2.75851	0.00580659	0.0810039	164398	527619	126440	1.4419e+06	712182	650077
19	hsa_piR_000765|gb|DQ570956|Homo	724521	1.77658	0.644039	2.7585	0.00580673	0.0810039	197283	633142	151725	1.73029e+06	854574	780110
21	hsa_piR_004153|gb|DQ575660|Homo	235200	2.1192	0.77682	2.72805	0.00637108	0.0846443	49980	191038	23028	485937	463880	197336
23	hsa_piR_012753|gb|DQ587269|Homo	73.0288	1.30948	0.485434	2.69755	0.00698516	0.0870935	44.1634	52.4767	30.14	105.635	79.0504	126.708
22	hsa_piR_003676|gb|DQ574995|Homo	3464.77	-0.746958	0.277846	-2.68839	0.00717975	0.0870935	3248.77	4941.21	4837.47	2799.8	2378.92	2582.43
24	hsa_piR_010402|gb|DQ584003|Homo	2521.49	-1.66151	0.634174	-2.61997	0.0087938	0.0995524	1692.93	3057.64	6746.52	1560.29	568.174	1503.4
25	hsa_piR_015150|gb|DQ590704|Homo	2.69163e+06	-1.09773	0.419768	-2.61509	0.00892047	0.0995524	2.28888e+06	2.96553e+06	5.75244e+06	1.69657e+06	1.59327e+06	1.85311e+06
26	hsa_piR_023338|gb|DQ601914|Homo	1.05296e+06	-1.05116	0.412661	-2.54728	0.0108568	0.116501	943899	1.18342e+06	2.134e+06	537418	821936	697069
28	hsa_piR_015267|gb|DQ590853|Homo	178.921	1.23937	0.494135	2.50816	0.0121363	0.123267	121.449	92.359	106.566	191.887	163.041	398.225
27	hsa_piR_006426|gb|DQ578783|Homo	32215.7	-0.613861	0.245408	-2.50139	0.0123708	0.123267	31787.5	44671.7	40443.1	22639.7	26751.1	27000.9
29	hsa_piR_017936|gb|DQ594740|Homo	1018.84	-0.905306	0.365212	-2.47885	0.0131808	0.126808	1285.34	1203.47	1496.24	463.242	711.453	953.326
31	hsa_piR_007424|gb|DQ580112|Homo	173.547	-1.64411	0.690217	-2.38203	0.0172177	0.153123	296.262	223.201	268.569	21.3207	106.224	125.702
33	hsa_piR_022296|gb|DQ600515|Homo	681757	-0.638125	0.268352	-2.37794	0.0174095	0.153123	663749	838800	987816	606605	524153	469419
30	hsa_piR_003817|gb|DQ575190|Homo	58.0413	-1.86168	0.78425	-2.37384	0.0176043	0.153123	51.5239	47.5789	174.381	34.8885	19.7626	20.1124
32	hsa_piR_019675|gb|DQ596992|Homo	2599.96	-0.440919	0.186567	-2.36333	0.0181114	0.153123	2831.05	3071.64	3076.97	2043.88	2378.92	2197.28
34	hsa_piR_003675|gb|DQ574994|Homo	582.471	0.986824	0.420141	2.34879	0.0188344	0.154553	333.065	253.288	584.501	701.646	894.257	728.068
36	hsa_piR_016552|gb|DQ592795|Homo	65.9025	-9.0623	3.90725	-2.31936	0.0203757	0.161194	143.531	0	251.884	0	0	0
35	hsa_piR_002158|gb|DQ572892|Homo	517.242	0.747947	0.323561	2.31161	0.0207992	0.161194	488.557	377.133	293.865	596.981	602.759	744.158
37	hsa_piR_020828|gb|DQ598675|Homo	370.197	-1.509	0.660403	-2.28497	0.0223148	0.168266	938.471	438.006	266.954	85.283	214.918	277.551
38	hsa_piR_005931|gb|DQ578144|Homo	1137.15	-1.70177	0.755375	-2.25288	0.0242666	0.178168	673.491	1195.07	3348.77	177.35	753.449	674.77
39	hsa_piR_008113|gb|DQ581032|Homo	230849	0.613282	0.275762	2.22396	0.0261514	0.187083	202901	211052	133574	270679	286251	280639
40	hsa_piR_015149|gb|DQ590703|Homo	176.537	-1.31512	0.602924	-2.18124	0.0291657	0.203431	165.613	214.105	377.827	139.554	44.4658	117.657
41	hsa_piR_016735|gb|DQ593039|Homo	212575	-0.71289	0.331017	-2.15364	0.0312686	0.209396	311083	247160	233910	118216	215056	150023
42	hsa_piR_019068|gb|DQ596183|Homo	90.8724	-1.41697	0.658927	-2.15042	0.031522	0.209396	164.692	92.359	139.936	21.3207	44.4658	82.4607
45	hsa_piR_011187|gb|DQ585094|Homo	937229	-1.07769	0.508063	-2.12118	0.033907	0.217788	665593	1.07765e+06	2.07236e+06	723696	403532	680546
44	hsa_piR_009228|gb|DQ582496|Homo	430.805	-0.756313	0.358199	-2.11143	0.0347352	0.217788	671.651	448.501	502.692	231.621	353.256	377.107
43	hsa_piR_001184|gb|DQ571550|Homo	1092.71	0.679781	0.323722	2.09989	0.0357386	0.217788	649.569	957.175	912.812	1071.85	1289.51	1675.36
46	hsa_piR_015254|gb|DQ590835|Homo	4213.9	-0.42793	0.203973	-2.09797	0.0359077	0.217788	4497.3	4925.82	5076.44	3581.89	3992.04	3209.93
47	hsa_piR_015249|gb|DQ590830|Homo	6560.52	-0.719494	0.345174	-2.08444	0.0371204	0.220353	11008.6	6433.65	7047.92	3900.73	5064.16	5908.01
49	hsa_piR_016945|gb|DQ593356|Homo	2936.01	0.943074	0.462108	2.04081	0.0412698	0.236119	2645.2	1990.62	1391.28	4569.42	4953	2066.55
48	hsa_piR_000775|gb|DQ570968|Homo	128.506	-0.732426	0.359242	-2.03881	0.041469	0.236119	176.653	153.932	152.853	98.8507	74.1097	114.64
50	hsa_piR_017194|gb|DQ593767|Homo	400.457	1.05314	0.520016	2.02521	0.0428459	0.23908	348.706	274.278	159.311	345.978	434.777	839.691
51	hsa_piR_001312|gb|DQ571813|Homo	11517.7	0.87495	0.434993	2.01141	0.044282	0.242249	6525.14	12575.5	5284.73	18717.7	14029	11973.9
52	hsa_piR_007979|gb|DQ580854|Homo	38.7804	-1.36864	0.685505	-1.99654	0.0458752	0.246138	59.8045	42.6811	65.124	10.6604	22.2329	32.1798
53	hsa_piR_020439|gb|DQ598084|Homo	35.8901	1.04836	0.52909	1.98144	0.0475416	0.250266	23.9218	27.2879	19.3757	48.4562	41.9955	54.3034
54	hsa_piR_000753|gb|DQ570940|Homo	798.387	-0.634021	0.322283	-1.96728	0.049151	0.253947	1058.08	803.943	1050.59	462.273	652.165	763.264
55	hsa_piR_017716|gb|DQ594453|Homo	225297	1.43378	0.731916	1.95894	0.05012	0.254245	62279.5	260379	42537.8	492228	289238	205121
56	hsa_piR_014923|gb|DQ590404|Homo	1169.08	-1.12718	0.578667	-1.94788	0.0514289	0.256226	1881.54	1039.04	1891.29	298.49	684.28	1219.81
57	hsa_piR_018573|gb|DQ595539|Homo	1251.46	-1.17814	0.613514	-1.92031	0.0548185	0.268322	2015.87	1127.9	2064.05	280.077	679.339	1341.49
58	hsa_piR_020668|gb|DQ598445|Homo	126.208	-1.38703	0.735698	-1.88533	0.0593858	0.285666	169.293	96.5572	281.486	23.259	79.0504	107.601
59	hsa_piR_015151|gb|DQ590705|Homo	165.504	-1.07271	0.571422	-1.87727	0.0604817	0.286007	111.328	230.898	331.54	149.245	81.5207	88.4944
63	hsa_piR_020786|gb|DQ598612|Homo	199.468	-0.967054	0.523484	-1.84734	0.0646975	0.291941	221.737	414.916	155.006	163.782	140.808	100.562
64	hsa_piR_022421|gb|DQ600670|Homo	2416.86	-0.884092	0.480703	-1.83917	0.0658908	0.291941	2608.4	3012.16	3786.34	1119.34	1124	2850.93
60	hsa_piR_000203|gb|DQ570215|Homo	73.4478	-1.33803	0.727957	-1.83806	0.066053	0.291941	111.328	146.235	59.2036	74.6226	27.1736	22.1236
65	hsa_piR_022628|gb|DQ600952|Homo	170.023	-1.4023	0.766291	-1.82999	0.0672517	0.291941	360.667	210.607	169.538	27.1355	69.1691	183.023
61	hsa_piR_005076|gb|DQ577008|Homo	47.3716	-2.33546	1.27675	-1.82922	0.0673671	0.291941	109.488	58.7739	67.815	13.5677	34.5845	0
62	hsa_piR_008560|gb|DQ581618|Homo	1001.2	-1.74686	0.957233	-1.82491	0.0680149	0.291941	425.072	969.77	3232.52	63.9622	652.165	663.708
66	hsa_piR_019485|gb|DQ596756|Homo	2349.29	0.922647	0.519437	1.77624	0.0756929	0.319974	1915.59	1456.75	1494.08	2690.29	5143.21	1395.8
67	hsa_piR_020541|gb|DQ598252|Homo	1080.5	0.906598	0.520523	1.74171	0.08156	0.33963	1037.84	675.201	543.058	2271.63	1203.05	752.202
68	hsa_piR_000651|gb|DQ570812|Homo	56.7852	-1.34335	0.774764	-1.73388	0.0829395	0.340296	79.126	57.3746	107.643	9.69125	34.5845	52.2921
69	hsa_piR_001311|gb|DQ571812|Homo	3376.81	0.824167	0.478617	1.72198	0.0850739	0.341713	1849.34	3988.23	1475.78	5518.2	3987.1	3442.23
70	hsa_piR_001318|gb|DQ571823|Homo	1748.74	-1.08173	0.629518	-1.71834	0.0857344	0.341713	2699.48	1499.44	2927.35	398.31	948.604	2019.28
73	hsa_piR_002485|gb|DQ573352|Homo	796.194	-0.978844	0.583441	-1.67771	0.093404	0.349132	1277.98	682.197	1209.37	223.868	481.713	902.04
78	hsa_piR_011324|gb|DQ585292|Homo	46.6233	-0.816755	0.48812	-1.67327	0.0942751	0.349132	67.1651	62.9721	48.9775	37.7959	29.6439	33.1854
77	hsa_piR_007832|gb|DQ580660|Homo	1196.81	-0.847001	0.510271	-1.65991	0.0969335	0.349132	1841.06	1278.33	1498.39	1433.34	429.836	699.91
80	hsa_piR_018292|gb|DQ595186|Homo	410.652	0.852823	0.51499	1.656	0.0977219	0.349132	296.262	380.631	201.292	272.324	536.06	777.343
72	hsa_piR_001346|gb|DQ571858|Homo	215.013	0.894389	0.542103	1.64985	0.0989735	0.349132	189.534	192.415	70.5061	338.225	192.685	306.714
82	hsa_piR_019676|gb|DQ596993|Homo	880.046	0.781202	0.473559	1.64964	0.0990169	0.349132	909.949	729.077	304.091	1006.92	1067.18	1263.06
71	hsa_piR_000586|gb|DQ570728|Homo	3085.44	0.728221	0.441699	1.64868	0.0992133	0.349132	3480.62	2243.21	1245.43	4278.69	3972.28	3292.39
74	hsa_piR_002528|gb|DQ573413|Homo	16579.8	-0.501858	0.307005	-1.63469	0.102114	0.349132	16182.2	18459.2	23665.3	17045	10862	13265.1
81	hsa_piR_019565|gb|DQ596854|Homo	173.487	-0.773692	0.473908	-1.63258	0.102558	0.349132	223.577	226.699	203.445	78.4991	200.096	108.607
83	hsa_piR_020490|gb|DQ598167|Homo	536.235	-0.60593	0.371369	-1.63161	0.102761	0.349132	679.012	523.368	740.583	331.441	355.727	587.281
76	hsa_piR_007336|gb|DQ580006|Homo	87.1866	0.842701	0.518578	1.62502	0.104158	0.349132	57.9644	75.5665	53.2832	139.554	133.397	63.3539
84	hsa_piR_022437|gb|DQ600690|Homo	6353.55	-0.844723	0.5199	-1.62478	0.10421	0.349132	5738.48	6442.04	12308.4	5756.6	2201.06	5674.7
79	hsa_piR_017178|gb|DQ593744|Homo	330.024	0.808115	0.498227	1.62198	0.104807	0.349132	222.657	328.154	169.538	266.509	355.727	637.562
75	hsa_piR_004721|gb|DQ576479|Homo	73.8868	-0.890178	0.549307	-1.62055	0.105115	0.349132	117.769	79.0649	89.3436	50.3945	76.58	30.1685
86	hsa_piR_016677|gb|DQ592953|Homo	1112.97	0.968296	0.604851	1.60088	0.109403	0.357973	482.117	1392.38	384.285	2060.36	1393.26	965.394
85	hsa_piR_011872|gb|DQ586059|Homo	38.9915	-2.07114	1.30172	-1.59108	0.111592	0.357973	66.245	41.9814	80.7322	0	14.8219	30.1685
87	hsa_piR_020381|gb|DQ597997|Homo	880.775	-0.485214	0.304989	-1.59093	0.111626	0.357973	1231.05	921.491	930.035	575.66	748.508	877.905
297	hsa_piR_012925|gb|DQ587514|Homo	12.3641	1.48764	0.941979	1.57927	0.114273	NA	11.0408	5.59752	3.22929	19.3825	14.8219	20.1124
287	hsa_piR_004800|gb|DQ576604|Homo	17.5881	-1.373	0.875737	-1.56783	0.116922	NA	38.6429	16.7926	21.5286	13.5677	4.94065	10.0562
88	hsa_piR_011876|gb|DQ586065|Homo	291.064	0.608526	0.389471	1.56244	0.118184	0.374696	253.019	230.898	207.213	426.415	407.603	221.236
89	hsa_piR_006701|gb|DQ579162|Homo	137.012	0.732684	0.470862	1.55605	0.119697	0.37523	92.007	83.9628	131.863	198.671	209.978	105.59
91	hsa_piR_012681|gb|DQ587153|Homo	1690.22	0.690424	0.449655	1.53545	0.124673	0.383572	1668.09	1505.73	707.752	1992.52	1539.01	2728.24
90	hsa_piR_000794|gb|DQ570992|Homo	677.652	0.731506	0.47696	1.53368	0.125108	0.383572	603.566	655.609	269.645	1102.86	839.91	594.32
92	hsa_piR_005691|gb|DQ577820|Homo	914.332	-0.828111	0.545655	-1.51765	0.129104	0.391521	667.971	1015.95	1823.47	351.792	896.727	730.079
93	hsa_piR_019544|gb|DQ596830|Homo	985843	-0.401978	0.265939	-1.51154	0.13065	0.39195	1.10385e+06	1.19359e+06	1.06947e+06	981030	926174	640945
94	hsa_piR_010024|gb|DQ583491|Homo	537.495	0.668549	0.451554	1.48055	0.138726	0.41175	382.749	492.582	370.292	976.878	632.403	370.068
95	hsa_piR_017791|gb|DQ594556|Homo	53.4804	1.00118	0.680065	1.47218	0.140972	0.414012	52.444	30.7863	24.7579	86.2521	32.1142	94.5281
300	hsa_piR_013393|gb|DQ588158|Homo	13.1363	-1.33771	0.911547	-1.46752	0.142235	NA	21.1616	15.3932	19.9139	3.8765	7.41097	11.0618
96	hsa_piR_020009|gb|DQ597484|Homo	217.324	0.529215	0.362086	1.46157	0.143858	0.418088	201.495	206.408	126.48	289.768	249.503	230.287
99	hsa_piR_020500|gb|DQ598190|Homo	601.662	0.507221	0.349515	1.45121	0.14672	0.421844	353.307	486.984	649.087	598.919	785.563	736.113
97	hsa_piR_000552|gb|DQ570687|Homo	1291.84	0.38435	0.266709	1.44109	0.14956	0.421844	1068.2	1124.4	1170.62	1239.51	1324.09	1824.19
98	hsa_piR_019825|gb|DQ597218|Homo	21492.4	0.836562	0.580688	1.44064	0.149687	0.421844	8827.15	29454.8	8008.63	31629.3	21252.2	29782.4
101	hsa_piR_008488|gb|DQ581533|Homo	1096.76	-0.423319	0.299122	-1.4152	0.157009	0.434913	1192.41	1551.21	1023.68	878.027	1111.65	823.601
100	hsa_piR_001918|gb|DQ572554|Homo	2895.72	-0.724949	0.512792	-1.41373	0.157442	0.434913	1904.54	2607.04	6313.26	2006.09	2045.43	2497.96
102	hsa_piR_001170|gb|DQ571526|Homo	2010.86	0.644639	0.459674	1.40238	0.160802	0.439839	1326.74	1155.89	2224.98	2042.92	1650.18	3664.47
103	hsa_piR_019420|gb|DQ596670|Homo	1131.56	0.594656	0.426016	1.39585	0.162759	0.440871	604.486	955.076	1145.86	1142.6	1000.48	1940.84
298	hsa_piR_013353|gb|DQ588104|Homo	27.5538	-0.975929	0.702795	-1.38864	0.164943	NA	36.8028	47.5789	24.2197	16.4751	27.1736	13.073
104	hsa_piR_011186|gb|DQ585093|Homo	515973	-0.48518	0.350661	-1.38362	0.166476	0.446603	458946	698033	648803	563984	308059	418015
108	hsa_piR_018570|gb|DQ595536|Homo	10514.7	0.484157	0.354958	1.36398	0.172572	0.455574	7965.96	12052.9	6282.58	14810.2	10627.3	11349.4
109	hsa_piR_020492|gb|DQ598170|Homo	416.427	-0.47512	0.350008	-1.35745	0.174637	0.455574	421.392	632.519	399.355	412.847	345.845	286.601
107	hsa_piR_014637|gb|DQ590031|Homo	212236	0.430611	0.318385	1.35249	0.17622	0.455574	126064	191737	224584	277643	215392	237994
106	hsa_piR_001107|gb|DQ571425|Homo	91912.4	0.415455	0.307593	1.35066	0.176803	0.455574	69237.1	65816.3	101254	127625	92948.4	94593.5
105	hsa_piR_000172|gb|DQ570169|Homo	103.64	-0.606232	0.450065	-1.34699	0.177984	0.455574	115.009	161.628	97.955	93.036	93.8723	60.3371
110	hsa_piR_004918|gb|DQ576766|Homo	22376.2	0.538989	0.403391	1.33615	0.181502	0.460355	12393.3	16964.7	25374.1	33940.7	26620.2	18963.9
111	hsa_piR_018569|gb|DQ595533|Homo	3697.52	0.606346	0.455896	1.33001	0.183515	0.461266	2373.78	4589.96	1832.08	5834.13	3922.87	3632.29
112	hsa_piR_002441|gb|DQ573293|Homo	80522	-0.296637	0.226169	-1.31157	0.189664	0.469974	75986.7	89305.6	101023	76400	64915.2	75501.8
113	hsa_piR_019168|gb|DQ596311|Homo	1248.2	0.413259	0.315573	1.30955	0.190348	0.469974	1066.36	1023.65	1121.64	1011.77	1447.61	1818.16
114	hsa_piR_016963|gb|DQ593398|Homo	233.56	0.680504	0.524153	1.29829	0.194187	0.475246	259.46	156.031	123.789	185.103	244.562	432.416
116	hsa_piR_020814|gb|DQ598650|Homo	265.079	0.574673	0.451052	1.27407	0.202638	0.491368	130.65	239.294	269.645	387.65	222.329	340.905
115	hsa_piR_001207|gb|DQ571591|Homo	121.048	0.664305	0.52332	1.26941	0.204296	0.491368	100.288	133.641	47.3629	156.998	148.219	139.781
117	hsa_piR_011094|gb|DQ584967|Homo	1612.86	0.416939	0.3312	1.25887	0.208076	0.4958	1236.57	1097.11	1808.4	1519.59	2213.41	1802.07
118	hsa_piR_016658|gb|DQ592931|Homo	619.123	0.677967	0.540466	1.25441	0.209693	0.4958	335.825	777.355	314.317	659.974	1126.47	500.798
119	hsa_piR_019912|gb|DQ597341|Homo	216.373	-0.734557	0.601845	-1.22051	0.222272	0.521125	322.024	319.058	167.385	119.202	284.087	86.4832
120	hsa_piR_016926|gb|DQ593325|Homo	2684.24	-0.464558	0.382748	-1.21374	0.224845	0.522765	3879.01	2770.77	2686.77	1395.54	2766.76	2606.56
310	hsa_piR_019122|gb|DQ596252|Homo	23.7114	-0.827863	0.692596	-1.1953	0.231968	NA	24.8419	31.486	35.5222	18.4134	9.88129	22.1236
123	hsa_piR_019949|gb|DQ597397|Homo	66.8633	-0.878057	0.737352	-1.19082	0.233723	0.533977	143.531	82.5634	33.3693	54.271	59.2878	28.1573
122	hsa_piR_009294|gb|DQ582566|Homo	950.636	-0.5525	0.464868	-1.18851	0.234633	0.533977	1019.44	1142.59	1229.28	386.681	763.33	1162.49
124	hsa_piR_020365|gb|DQ597975|Homo	3452.38	0.384538	0.325056	1.18299	0.236813	0.533977	3483.38	3059.74	2440.26	4016.05	4873.95	2840.87
121	hsa_piR_008983|gb|DQ582175|Homo	223639	-0.504008	0.426509	-1.1817	0.237323	0.533977	218995	166540	401398	215293	195995	143614
125	hsa_piR_001042|gb|DQ571335|Homo	39.6068	0.747464	0.638026	1.17153	0.241388	0.536938	27.6021	34.9845	26.9107	45.5489	27.1736	75.4214
126	hsa_piR_007870|gb|DQ580708|Homo	231.894	0.755919	0.646753	1.16879	0.242488	0.536938	126.05	95.8575	294.942	398.31	338.434	137.77
127	hsa_piR_000799|gb|DQ570997|Homo	73.4821	-0.752361	0.646587	-1.16359	0.244591	0.537329	57.9644	78.3652	139.398	67.8387	69.1691	28.1573
129	hsa_piR_016946|gb|DQ593358|Homo	60.5151	-0.922492	0.797298	-1.15702	0.247263	0.538413	119.609	48.9783	69.9679	19.3825	24.7032	80.4495
290	hsa_piR_006927|gb|DQ579443|Homo	23.4154	-0.799387	0.691851	-1.15543	0.247913	NA	24.8419	30.7863	34.4457	18.4134	9.88129	22.1236
128	hsa_piR_003674|gb|DQ574993|Homo	11657.8	0.540032	0.468405	1.15292	0.248944	0.538413	11438.3	8698.54	8363.85	9036.12	23033.3	9376.38
311	hsa_piR_019269|gb|DQ596455|Homo	23.879	-0.799313	0.696453	-1.14769	0.251096	NA	24.8419	31.486	35.5222	18.4134	9.88129	23.1292
132	hsa_piR_014634|gb|DQ590028|Homo	13352.6	0.386767	0.338724	1.14183	0.253523	0.5399	7979.77	11847.8	14892.9	18011.2	13263.2	14120.9
134	hsa_piR_020813|gb|DQ598646|Homo	1522.01	0.296787	0.262415	1.13098	0.258062	0.5399	1289.02	1640.07	1168.46	1464.35	1748.99	1821.17
131	hsa_piR_002286|gb|DQ573083|Homo	12099	-0.627055	0.554799	-1.13024	0.258376	0.5399	20064.9	18505.4	5494.09	13040.5	8023.61	7465.71
130	hsa_piR_001511|gb|DQ572064|Homo	121.677	-1.34294	1.189	-1.12948	0.258697	0.5399	239.218	145.535	139.936	100.789	0	104.584
133	hsa_piR_014636|gb|DQ590030|Homo	425990	0.335038	0.297011	1.12803	0.259307	0.5399	279471	399558	451212	553419	420202	452076
135	hsa_piR_020485|gb|DQ598159|Homo	19332.6	-0.552194	0.492284	-1.1217	0.26199	0.541447	27906.6	12896	28162.1	10684.6	12208.3	24137.9
136	hsa_piR_016828|gb|DQ593158|Homo	177.238	-0.5494	0.493017	-1.11436	0.265123	0.543892	165.613	209.907	258.343	174.442	74.1097	181.011
137	hsa_piR_013458|gb|DQ588249|Homo	3530.92	0.552425	0.505025	1.09386	0.274018	0.558038	1232.89	3750.34	3606.04	3895.88	3310.23	5390.11
138	hsa_piR_008982|gb|DQ582174|Homo	574.352	-0.648229	0.596583	-1.08657	0.277227	0.56048	345.946	591.937	1163.62	364.391	696.631	283.584
139	hsa_piR_022298|gb|DQ600517|Homo	175.835	-0.417795	0.388723	-1.07479	0.282469	0.56697	235.538	145.535	223.897	170.566	118.576	160.899
140	hsa_piR_014635|gb|DQ590029|Homo	169236	0.335427	0.314441	1.06674	0.286089	0.570134	107099	159351	182502	220713	162530	183220
141	hsa_piR_001101|gb|DQ571419|Homo	1083.5	0.367536	0.34726	1.05839	0.289878	0.573589	1046.12	849.423	944.028	890.626	1089.41	1681.39
142	hsa_piR_014633|gb|DQ590027|Homo	31504.1	0.403019	0.385576	1.04524	0.295913	0.581406	18622.2	30093.7	32680.4	47811.8	34374.6	25442.1
143	hsa_piR_017104|gb|DQ593636|Homo	82.1932	0.473751	0.462506	1.02431	0.305688	0.596413	70.8454	80.4643	54.8979	114.357	106.224	66.3708
145	hsa_piR_017383|gb|DQ594028|Homo	53.8515	1.59856	1.57163	1.01714	0.309087	0.597708	47.8436	18.1919	13.9936	50.3945	192.685	0
144	hsa_piR_008112|gb|DQ581031|Homo	31349.5	0.408198	0.402744	1.01354	0.310802	0.597708	39431.4	24931.3	16470.4	38359.9	29690.8	39213.1
146	hsa_piR_019574|gb|DQ596863|Homo	140.844	0.380622	0.377075	1.00941	0.312779	0.597708	125.129	127.344	114.64	117.264	160.571	200.118
147	hsa_piR_004801|gb|DQ576605|Homo	111.066	-0.518356	0.531157	-0.975899	0.329114	0.62431	187.694	96.5572	106.566	69.777	133.397	72.4045
148	hsa_piR_009154|gb|DQ582400|Homo	4657.96	-0.323907	0.333323	-0.97175	0.331175	0.62431	5482.7	5573.03	4477.41	4174.02	5392.72	2847.91
282	hsa_piR_001159|gb|DQ571511|Homo	33.8669	0.618246	0.639552	0.966687	0.333701	NA	40.4831	23.0898	17.2229	44.5797	34.5845	43.2416
312	hsa_piR_019354|gb|DQ596587|Homo	32.2964	-0.61236	0.638444	-0.959145	0.337486	NA	44.1634	39.8823	31.7547	20.3516	39.5252	18.1011
149	hsa_piR_004987|gb|DQ576872|Homo	13150.4	0.27309	0.287996	0.948244	0.343005	0.640738	13602.3	12009.5	10115.7	16030.3	16254.7	10889.8
150	hsa_piR_019324|gb|DQ596538|Homo	36.1308	-0.727823	0.769903	-0.945344	0.344483	0.640738	52.444	27.9876	54.3597	10.6604	32.1142	39.2191
319	hsa_piR_020572|gb|DQ598296|Homo	27.3307	-2.38248	2.52328	-0.944199	0.345068	NA	0	81.8637	55.9743	0	0	26.1461
304	hsa_piR_017318|gb|DQ593939|Homo	15.2001	-0.779609	0.847235	-0.92018	0.357479	NA	12.881	26.5882	18.2993	15.506	9.88129	8.04495
151	hsa_piR_019167|gb|DQ596309|Homo	214.139	0.293072	0.31867	0.919673	0.357744	0.660997	193.215	195.913	188.913	195.763	217.388	293.641
320	hsa_piR_020793|gb|DQ598619|Homo	21.3819	-0.626987	0.703777	-0.890889	0.372989	NA	19.3215	29.387	29.6018	15.506	12.3516	22.1236
152	hsa_piR_002852|gb|DQ573835|Homo	440.166	-0.418504	0.472715	-0.88532	0.375984	0.690128	454.514	319.058	736.277	460.334	422.425	248.388
153	hsa_piR_020575|gb|DQ598300|Homo	185.235	-1.39558	1.59665	-0.874066	0.382082	0.696738	14.7211	307.863	482.24	0	177.863	128.719
154	hsa_piR_005337|gb|DQ577347|Homo	240212	-0.302442	0.349871	-0.864439	0.387347	0.701752	281100	249397	265404	262323	132409	250640
157	hsa_piR_022294|gb|DQ600513|Homo	118.587	-0.417394	0.489274	-0.853089	0.39361	0.703233	188.614	86.0618	132.401	79.4682	101.283	123.691
155	hsa_piR_016271|gb|DQ592181|Homo	772189	0.401871	0.47156	0.852217	0.394094	0.703233	739471	535570	720949	890168	1.32362e+06	423357
156	hsa_piR_019752|gb|DQ597110|Homo	4758.9	-0.204592	0.240901	-0.849279	0.395726	0.703233	5713.63	4804.77	4766.43	3724.35	5091.34	4452.88
307	hsa_piR_018430|gb|DQ595353|Homo	8.71349	-1.04989	1.24772	-0.841447	0.400097	NA	10.1208	11.195	13.9936	0.969125	4.94065	11.0618
158	hsa_piR_008114|gb|DQ581033|Homo	264736	0.249457	0.296555	0.841185	0.400244	0.706761	223172	290079	212462	218914	302128	341659
160	hsa_piR_016742|gb|DQ593049|Homo	574.283	0.244451	0.295503	0.827236	0.408103	0.711004	575.044	563.25	441.336	746.226	506.416	613.427
161	hsa_piR_018780|gb|DQ595807|Homo	2622.95	0.361755	0.439726	0.822682	0.410689	0.711004	3213.8	2424.42	1250.81	2859.89	2339.4	3649.39
159	hsa_piR_012174|gb|DQ586451|Homo	451.305	-2.32355	2.82507	-0.822476	0.410806	0.711004	855.665	650.711	750.809	450.643	0	0
162	hsa_piR_020008|gb|DQ597482|Homo	82.6601	-0.85595	1.04553	-0.818676	0.412971	0.711004	140.771	65.0711	114.64	23.259	7.41097	144.809
163	hsa_piR_020388|gb|DQ598008|Homo	1544.86	0.358849	0.440605	0.814446	0.41539	0.711004	1116.96	1390.28	1555.44	1458.53	1049.89	2698.07
171	hsa_piR_020401|gb|DQ598029|Homo	1.02138e+06	0.262911	0.327811	0.80202	0.422541	0.712598	920011	866227	999477	1.47667e+06	764575	1.10132e+06
164	hsa_piR_000796|gb|DQ570994|Homo	40.214	0.649284	0.815543	0.796137	0.425952	0.712598	31.2824	53.1764	9.68786	62.9931	46.9361	37.2079
169	hsa_piR_015800|gb|DQ591595|Homo	467.387	0.313587	0.39513	0.793631	0.42741	0.712598	389.19	491.182	368.139	540.772	689.22	325.82
167	hsa_piR_004962|gb|DQ576828|Homo	80.0749	-0.426523	0.538882	-0.791496	0.428654	0.712598	60.7246	77.6656	137.245	61.0549	59.2878	84.4719
166	hsa_piR_004337|gb|DQ575973|Homo	61.0672	-1.10844	1.40732	-0.787623	0.430917	0.712598	143.531	36.3839	69.9679	0	64.2284	52.2921
170	hsa_piR_016659|gb|DQ592932|Homo	286.165	0.444067	0.570374	0.778554	0.436242	0.712598	218.977	384.829	122.713	319.811	459.48	211.18
168	hsa_piR_006465|gb|DQ578832|Homo	487467	-0.282843	0.363667	-0.777754	0.436714	0.712598	653640	441846	509814	611991	389995	317518
165	hsa_piR_001152|gb|DQ571500|Homo	203.245	0.384785	0.49531	0.776857	0.437243	0.712598	255.779	144.836	129.71	194.794	165.512	328.837
172	hsa_piR_021650|gb|DQ599684|Homo	592.305	-0.218757	0.282865	-0.773363	0.439307	0.712598	544.681	569.547	796.557	573.722	548.412	520.91
173	hsa_piR_020582|gb|DQ598312|Homo	228.035	0.385374	0.502152	0.767445	0.442817	0.714138	176.653	207.108	210.98	224.837	138.338	410.292
174	hsa_piR_001386|gb|DQ571911|Homo	393.34	-2.81986	3.72647	-0.756712	0.449223	0.71817	0	814.439	1252.96	0	0	292.635
175	hsa_piR_011188|gb|DQ585095|Homo	1.00226e+06	-0.368088	0.487767	-0.75464	0.450465	0.71817	834025	806032	1.74824e+06	549058	1.25961e+06	816617
176	hsa_piR_000560|gb|DQ570698|Homo	310.777	0.339822	0.457868	0.742184	0.457976	0.724103	366.188	277.077	181.378	303.336	251.973	484.708
177	hsa_piR_007489|gb|DQ580213|Homo	40.5799	-0.917266	1.24105	-0.739105	0.459843	0.724103	51.5239	78.3652	30.14	27.1355	0	56.3146
179	hsa_piR_022295|gb|DQ600514|Homo	13445.8	-0.223932	0.305752	-0.732399	0.463925	0.724103	12045.6	19084	12331	10573.2	13475.6	13165.6
178	hsa_piR_020657|gb|DQ598428|Homo	58.273	0.494907	0.676708	0.731346	0.464568	0.724103	72.6855	53.8761	18.8375	57.1784	71.6394	75.4214
180	hsa_piR_020466|gb|DQ598130|Homo	251.486	0.686185	0.946331	0.725101	0.46839	0.726005	356.067	207.808	14.5318	296.552	402.663	231.292
181	hsa_piR_019201|gb|DQ596354|Homo	259.327	0.305741	0.427714	0.714825	0.474717	0.731746	232.778	258.885	204.522	181.226	269.265	409.287
182	hsa_piR_000805|gb|DQ571003|Homo	2249.27	-0.247693	0.356344	-0.695096	0.486995	0.744452	2020.47	3341.72	1961.25	1845.21	2569.14	1757.82
183	hsa_piR_014880|gb|DQ590349|Homo	4418.9	-0.242243	0.349547	-0.69302	0.488297	0.744452	5809.32	3614.6	4942.96	5006.5	4253.9	2886.12
184	hsa_piR_013855|gb|DQ588925|Homo	24523	0.346282	0.503191	0.688171	0.491345	0.745029	31300.8	20403	13078.6	37679.6	30014.4	14661.9
185	hsa_piR_017458|gb|DQ594126|Homo	801.559	0.198266	0.291579	0.679973	0.496522	0.748808	685.452	931.287	622.714	747.195	879.435	943.27
186	hsa_piR_018800|gb|DQ595833|Homo	9765.5	-0.252426	0.376345	-0.67073	0.502393	0.753589	6575.74	14287.7	10990.3	8905.29	7566.6	10267.4
322	hsa_piR_020851|gb|DQ598705|Homo	27.816	-0.961899	1.44284	-0.666671	0.504982	NA	12.881	48.9783	48.9775	6.78387	0	49.2753
187	hsa_piR_010791|gb|DQ584559|Homo	838.977	-0.279207	0.422913	-0.6602	0.509126	0.757343	1117.88	1076.82	566.74	1020.49	600.289	651.641
188	hsa_piR_023244|gb|DQ601792|Homo	24915.5	-0.199119	0.30246	-0.658332	0.510325	0.757343	21590.4	24628.4	33679.3	22741.5	19322.9	27530.8
301	hsa_piR_013856|gb|DQ588926|Homo	13.79	-1.32533	2.05273	-0.645645	0.518509	NA	11.0408	41.9814	6.45857	23.259	0	0
321	hsa_piR_020815|gb|DQ598651|Homo	23.429	0.549463	0.867869	0.633117	0.526657	NA	31.2824	16.7926	8.61143	21.3207	44.4658	18.1011
194	hsa_piR_017033|gb|DQ593538|Homo	1911.63	0.2409	0.383038	0.628919	0.529402	0.778693	2340.66	1805.9	1111.41	1701.78	2028.14	2481.87
191	hsa_piR_004262|gb|DQ575814|Homo	34.8587	-0.381456	0.612543	-0.622742	0.533454	0.778693	30.3623	33.5851	54.8979	34.8885	22.2329	33.1854
193	hsa_piR_016796|gb|DQ593114|Homo	4855.08	0.340705	0.552079	0.617131	0.537148	0.778693	1758.25	4775.38	6318.1	5291.42	7418.38	3568.94
190	hsa_piR_003231|gb|DQ574379|Homo	1468.58	-1.19962	1.96738	-0.609752	0.542026	0.778693	1122.49	2390.14	2626.49	709.399	0	1962.97
192	hsa_piR_009895|gb|DQ583325|Homo	23979.4	-0.408183	0.669912	-0.609308	0.54232	0.778693	37163.5	28261.9	16624.4	36842.2	5869.49	19114.8
189	hsa_piR_001169|gb|DQ571525|Homo	774.177	0.362082	0.595482	0.608048	0.543155	0.778693	535.481	458.996	1038.75	527.204	541.001	1543.62
296	hsa_piR_011901|gb|DQ586098|Homo	23.5935	-0.530428	0.873268	-0.607406	0.543581	NA	24.8419	44.0805	14.5318	8.72212	22.2329	27.1517
195	hsa_piR_018735|gb|DQ595749|Homo	394.078	-0.395719	0.652569	-0.606403	0.544248	0.778693	463.715	587.739	293.865	366.329	103.754	549.068
196	hsa_piR_002622|gb|DQ573540|Homo	55.5376	0.474963	0.7984	0.594893	0.551915	0.785634	55.2042	33.5851	51.6686	81.4065	14.8219	96.5394
197	hsa_piR_017061|gb|DQ593574|Homo	47.153	-0.28538	0.509868	-0.559713	0.575675	0.815296	65.325	52.4767	37.675	39.7341	44.4658	43.2416
198	hsa_piR_004271|gb|DQ575827|Homo	4434.91	-0.202174	0.367411	-0.550268	0.582136	0.820282	3286.49	4472.42	6475.8	3279.52	4179.79	4915.46
199	hsa_piR_004735|gb|DQ576498|Homo	139.542	-0.682324	1.25336	-0.544397	0.586169	0.821814	167.453	118.248	230.894	163.782	0	156.876
306	hsa_piR_018165|gb|DQ595023|Homo	31.5951	0.424925	0.78928	0.538371	0.590321	NA	46.9236	20.291	14.5318	50.3945	22.2329	35.1966
201	hsa_piR_014626|gb|DQ590020|Homo	64578.3	0.188181	0.357746	0.526017	0.598876	0.834169	76794.5	51911.4	52409.7	49432.1	91639.1	65282.7
200	hsa_piR_005177|gb|DQ577145|Homo	8827.64	-0.243057	0.464719	-0.52302	0.60096	0.834169	9844.75	9358.35	9502.18	6740.26	13216.2	4304.05
202	hsa_piR_001884|gb|DQ572514|Homo	210.724	-0.217085	0.425692	-0.509958	0.610081	0.842636	232.778	305.065	142.089	172.504	192.685	219.225
281	hsa_piR_001040|gb|DQ571333|Homo	20.6323	-0.547519	1.07718	-0.508291	0.611249	NA	25.762	18.1919	29.0636	1.93825	24.7032	24.1348
203	hsa_piR_001104|gb|DQ571422|Homo	10313.7	0.358074	0.729035	0.491162	0.623312	0.85667	12169.8	3084.93	11864.9	8545.74	21783.3	4433.77
280	hsa_piR_000801|gb|DQ570999|Homo	11.0203	0.411513	0.860579	0.478182	0.632521	NA	9.2007	11.8947	7.535	14.5369	9.88129	13.073
204	hsa_piR_007661|gb|DQ580441|Homo	284.299	-1.75297	3.72617	-0.470448	0.638035	0.872607	0	271.48	1044.14	0	0	390.18
285	hsa_piR_003759|gb|DQ575105|Homo	10.6363	-1.31525	2.80864	-0.468288	0.639579	NA	33.1225	12.5944	0	0	0	18.1011
205	hsa_piR_004920|gb|DQ576768|Homo	94.4816	0.281906	0.607296	0.464199	0.642505	0.874434	36.8028	89.5603	129.171	124.048	98.8129	88.4944
317	hsa_piR_020496|gb|DQ598175|Homo	25.941	-0.448939	0.994796	-0.451287	0.651783	NA	34.9627	6.9969	48.4393	25.1972	9.88129	30.1685
207	hsa_piR_009295|gb|DQ582567|Homo	618.995	0.289495	0.641862	0.451025	0.651972	0.879027	348.706	1069.83	252.961	943.928	629.933	468.618
206	hsa_piR_000848|gb|DQ571067|Homo	103.637	-0.350597	0.777837	-0.450734	0.652182	0.879027	190.454	94.4581	62.9711	113.388	133.397	27.1517
305	hsa_piR_017858|gb|DQ594648|Homo	24.3838	-1.19627	2.67186	-0.44773	0.654348	NA	40.4831	61.5727	0	0	0	44.2472
284	hsa_piR_002515|gb|DQ573393|Homo	23.8296	-1.19608	2.67437	-0.447237	0.654704	NA	39.563	60.1733	0	0	0	43.2416
224	hsa_piR_017295|gb|DQ593909|Homo	81.2535	-0.201832	0.476371	-0.423688	0.671794	0.885732	104.888	67.1702	87.1907	58.1475	103.754	66.3708
229	hsa_piR_019607|gb|DQ596908|Homo	39.3271	-0.872439	2.10459	-0.414542	0.678478	0.885732	15.6412	35.6842	100.646	0	83.991	0
216	hsa_piR_010023|gb|DQ583490|Homo	1974.59	0.246049	0.597626	0.41171	0.680552	0.885732	2001.15	2221.51	1197.53	3609.99	2038.02	779.354
221	hsa_piR_016792|gb|DQ593109|Homo	5.47821e+06	-0.137454	0.33464	-0.410753	0.681254	0.885732	5.66704e+06	6.12093e+06	5.429e+06	7.0073e+06	3.52825e+06	5.11675e+06
220	hsa_piR_014879|gb|DQ590348|Homo	244159	-0.138505	0.339605	-0.407841	0.683391	0.885732	255485	200766	311357	183889	308682	204776
210	hsa_piR_005007|gb|DQ576900|Homo	2622.98	0.274768	0.68119	0.403364	0.68668	0.885732	3216.56	611.529	3292.8	2541.05	4318.13	1757.82
228	hsa_piR_019557|gb|DQ596845|Homo	520.464	0.142933	0.354702	0.402968	0.686972	0.885732	471.996	358.941	653.931	627.993	466.891	543.034
209	hsa_piR_003672|gb|DQ574991|Homo	1243.18	0.197598	0.507799	0.389126	0.697183	0.885732	828.063	1679.26	968.786	2035.16	741.097	1206.74
218	hsa_piR_011374|gb|DQ585363|Homo	116.411	-0.153072	0.393777	-0.388728	0.697478	0.885732	115.929	137.139	113.025	81.4065	138.338	112.629
213	hsa_piR_009584|gb|DQ582929|Homo	46.7273	0.363218	0.955132	0.38028	0.703738	0.885732	55.2042	55.9752	10.7643	19.3825	98.8129	40.2247
215	hsa_piR_009901|gb|DQ583332|Homo	32067.3	-0.126187	0.33666	-0.37482	0.707794	0.885732	41099.5	31255.1	28049	23088.4	40461.4	28449.9
225	hsa_piR_018145|gb|DQ594989|Homo	4991.22	0.878463	2.34963	0.373872	0.708499	0.885732	3001.27	2282.39	5266.97	0	16116.4	3280.33
232	hsa_piR_021190|gb|DQ599117|Homo	147.551	-0.308381	0.826537	-0.3731	0.709074	0.885732	198.735	69.2693	222.821	78.4991	44.4658	271.517
231	hsa_piR_020097|gb|DQ597608|Homo	3381.31	0.339412	0.922209	0.368043	0.712841	0.885732	2436.34	463.195	6057.07	7698.73	1635.35	1997.16
288	hsa_piR_005264|gb|DQ577247|Homo	24.6881	-0.25407	0.719314	-0.353212	0.723929	NA	17.4813	31.486	30.6782	22.2899	32.1142	14.0787
226	hsa_piR_019102|gb|DQ596225|Homo	324.238	0.152412	0.432807	0.352148	0.724727	0.885732	451.754	273.579	196.448	288.799	355.727	379.118
223	hsa_piR_017138|gb|DQ593692|Homo	11374.3	-0.771515	2.1997	-0.350736	0.725786	0.885732	16528.1	13616.7	12891.3	10155.5	0	15054.1
212	hsa_piR_007819|gb|DQ580647|Homo	14931.8	0.215349	0.618827	0.347996	0.727843	0.885732	9604.61	21912.2	9940.28	18677	23804	5652.58
230	hsa_piR_019723|gb|DQ597069|Homo	37.2412	-0.232961	0.671454	-0.34695	0.728629	0.885732	46.9236	23.0898	50.0539	37.7959	44.4658	21.118
214	hsa_piR_009799|gb|DQ583196|Homo	861.589	1.28522	3.7252	0.345008	0.730089	0.885732	0	850.123	653.931	0	0	3665.48
289	hsa_piR_005271|gb|DQ577259|Homo	18.7685	0.270691	0.786633	0.344113	0.730761	NA	11.9609	23.0898	16.1464	30.0429	17.2923	14.0787
208	hsa_piR_000291|gb|DQ570344|Homo	112.632	0.206038	0.605327	0.340375	0.733574	0.885732	132.49	71.3683	111.41	121.141	54.3471	185.034
219	hsa_piR_013588|gb|DQ588538|Homo	3006.67	1.26056	3.72503	0.338403	0.73506	0.885732	5312.48	0	0	5595.73	7131.82	0
217	hsa_piR_011370|gb|DQ585359|Homo	82.914	0.147203	0.435383	0.3381	0.735288	0.885732	73.6056	76.9659	86.1143	116.295	74.1097	70.3933
227	hsa_piR_019308|gb|DQ596516|Homo	751.648	-0.139328	0.412112	-0.338084	0.7353	0.885732	717.654	945.98	699.679	957.495	770.741	418.337
211	hsa_piR_005023|gb|DQ576923|Homo	528.027	-0.498209	1.47393	-0.338014	0.735353	0.885732	702.933	534.563	616.794	370.206	943.664	0
222	hsa_piR_017008|gb|DQ593502|Homo	1341.23	0.200081	0.594663	0.336462	0.736523	0.885732	1550.32	1650.57	544.135	1959.57	1665	677.787
286	hsa_piR_004506|gb|DQ576200|Homo	19.2008	0.252311	0.773428	0.326224	0.744255	NA	24.8419	10.4953	17.7611	26.1664	14.8219	21.118
233	hsa_piR_009981|gb|DQ583434|Homo	248229	0.161911	0.507742	0.318884	0.749815	0.894793	283897	295927	123122	373791	262842	149797
234	hsa_piR_014628|gb|DQ590022|Homo	1101.05	0.634004	1.99361	0.318017	0.750472	0.894793	833.583	1267.84	487.622	2195.07	0	1822.18
235	hsa_piR_013817|gb|DQ588873|Homo	65.0405	-0.254188	0.835356	-0.304287	0.760909	0.903377	51.5239	107.752	52.745	94.9742	69.1691	14.0787
236	hsa_piR_014627|gb|DQ590021|Homo	1022.11	0.609753	2.03456	0.299697	0.764408	0.903686	863.025	1312.62	252.423	1818.08	0	1886.54
239	hsa_piR_016374|gb|DQ592313|Homo	19473.8	-0.149545	0.516742	-0.2894	0.772276	0.906659	21492.8	28715.3	11237.9	23491.6	22331.7	9573.49
238	hsa_piR_014959|gb|DQ590455|Homo	3211.64	0.0826237	0.287717	0.28717	0.773982	0.906659	3691.32	3096.13	2572.13	3888.13	3352.23	2669.92
303	hsa_piR_017184|gb|DQ593752|Homo	23.2538	0.246793	0.884797	0.278927	0.780301	NA	37.7229	18.1919	8.61143	31.012	14.8219	29.1629
241	hsa_piR_020497|gb|DQ598177|Homo	65.894	0.117959	0.423914	0.278262	0.780811	0.906659	57.9644	60.1733	72.1207	67.8387	56.8174	80.4495
237	hsa_piR_004921|gb|DQ576769|Homo	50.0675	0.179003	0.647413	0.276489	0.782172	0.906659	22.0817	47.5789	71.0443	62.024	49.4065	48.2697
240	hsa_piR_017848|gb|DQ594634|Homo	1381.08	-0.170448	0.619387	-0.275189	0.783171	0.906659	1276.14	2247.4	864.372	2122.38	1262.34	513.871
242	hsa_piR_019179|gb|DQ596327|Homo	9921.83	0.116348	0.434818	0.267578	0.789024	0.90966	5989.65	7808.54	14765.9	9914.15	12635.7	8417.02
291	hsa_piR_007540|gb|DQ580277|Homo	21.3073	-0.704262	2.66839	-0.263928	0.791836	NA	0	52.4767	26.9107	48.4562	0	0
244	hsa_piR_017094|gb|DQ593621|Homo	31995.6	0.144427	0.559041	0.258347	0.796139	0.910678	11074	33685.9	46425.3	36937.2	39643.8	24207.2
243	hsa_piR_008562|gb|DQ581620|Homo	1114.74	-0.840784	3.25931	-0.257963	0.796435	0.910678	1479.47	2812.75	0	779.176	0	1617.03
247	hsa_piR_015186|gb|DQ590750|Homo	85.7745	-0.125554	0.522179	-0.240442	0.809988	0.911802	101.208	100.056	65.6622	54.271	121.046	72.4045
249	hsa_piR_021987|gb|DQ600117|Homo	85.7745	-0.125554	0.522179	-0.240442	0.809988	0.911802	101.208	100.056	65.6622	54.271	121.046	72.4045
246	hsa_piR_010862|gb|DQ584649|Homo	10041.6	-0.130119	0.542666	-0.239777	0.810503	0.911802	11631.5	14712.4	5137.8	11835	12003.3	4929.54
245	hsa_piR_002372|gb|DQ573194|Homo	350.45	0.87781	3.72553	0.23562	0.813728	0.911802	0	589.838	151.238	1361.62	0	0
248	hsa_piR_019224|gb|DQ596390|Homo	1595.44	0.101082	0.429077	0.23558	0.813758	0.911802	1452.79	1458.15	1707.22	871.243	1766.28	2316.94
250	hsa_piR_002580|gb|DQ573482|Homo	131.825	-0.849752	3.72682	-0.22801	0.819639	0.913966	0	0	508.613	0	155.63	126.708
251	hsa_piR_022315|gb|DQ600539|Homo	58.7937	0.34735	1.5461	0.224663	0.822242	0.913966	25.762	39.1826	90.42	162.813	34.5845	0
252	hsa_piR_019497|gb|DQ596772|Homo	85.0669	-0.114263	0.521248	-0.219211	0.826486	0.915038	99.3675	98.6562	65.6622	54.271	121.046	71.3989
254	hsa_piR_020495|gb|DQ598174|Homo	112.053	-0.779599	3.7271	-0.20917	0.834315	0.918231	226.337	0	198.601	0	0	247.382
253	hsa_piR_014817|gb|DQ590275|Homo	77.5039	-0.284463	1.37373	-0.207074	0.835952	0.918231	165.613	41.9814	48.4393	58.1475	0	150.843
255	hsa_piR_000045|gb|DQ569993|Homo	36.4653	0.127163	0.631971	0.201216	0.840529	0.919638	49.6838	29.387	26.3725	34.8885	27.1736	51.2865
256	hsa_piR_020364|gb|DQ597971|Homo	109.056	-0.166112	0.855063	-0.194269	0.845965	0.92197	154.572	16.7926	174.381	81.4065	118.576	108.607
318	hsa_piR_020499|gb|DQ598183|Homo	34.6274	0.25678	1.35974	0.188845	0.850214	NA	27.6021	12.5944	54.8979	52.3327	0	60.3371
258	hsa_piR_016240|gb|DQ592148|Homo	201.412	-0.111178	0.615849	-0.180528	0.856738	0.927766	298.103	88.1609	242.197	156.998	133.397	289.618
257	hsa_piR_013306|gb|DQ588040|Homo	62.2378	-0.0968893	0.541268	-0.179004	0.857934	0.927766	57.9644	79.0649	57.0507	52.3327	39.5252	87.4888
259	hsa_piR_020809|gb|DQ598639|Homo	201.178	-0.10784	0.618387	-0.17439	0.861559	0.928089	306.383	88.1609	232.509	156.998	133.397	289.618
262	hsa_piR_019951|gb|DQ597403|Homo	43.2312	0.0904509	0.556401	0.162564	0.870862	0.934265	45.0834	44.0805	37.675	59.1166	27.1736	46.2584
294	hsa_piR_010624|gb|DQ584310|Homo	21.3536	0.150486	0.935443	0.160872	0.872195	NA	16.5613	31.486	12.3789	31.012	29.6439	7.03933
260	hsa_piR_013704|gb|DQ588717|Homo	68.7841	0.0927052	0.58532	0.158384	0.874154	0.934265	38.6429	92.359	67.815	46.518	88.9317	78.4382
309	hsa_piR_019050|gb|DQ596155|Homo	19.4369	-0.145063	0.927855	-0.156342	0.875763	NA	29.4422	18.1919	14.5318	20.3516	4.94065	29.1629
261	hsa_piR_013745|gb|DQ588779|Homo	463123	0.0593086	0.384262	0.154344	0.877338	0.934265	546969	383009	430839	610357	523452	284115
263	hsa_piR_020619|gb|DQ598378|Homo	470.123	0.0530418	0.394782	0.134357	0.89312	0.947454	560.323	385.529	440.259	384.743	368.078	681.809
264	hsa_piR_022017|gb|DQ600174|Homo	921.75	-0.0509011	0.392424	-0.129709	0.896796	0.947751	1043.36	793.448	978.474	1325.76	755.919	633.539
324	hsa_piR_022367|gb|DQ600607|Homo	8.64992	-0.272221	2.10668	-0.129218	0.897185	NA	11.0408	6.29721	11.3025	23.259	0	0
323	hsa_piR_021032|gb|DQ598918|Homo	18.9241	-0.0957652	0.83648	-0.114486	0.908853	NA	33.1225	14.6935	11.3025	16.4751	14.8219	23.1292
314	hsa_piR_019824|gb|DQ597217|Homo	30.863	-0.0838005	0.802439	-0.104432	0.916826	NA	25.762	25.1888	45.21	34.8885	9.88129	44.2472
268	hsa_piR_013755|gb|DQ588793|Homo	478.777	-0.0318031	0.307527	-0.103416	0.917633	0.960199	450.834	514.272	489.775	508.791	345.845	563.146
266	hsa_piR_007812|gb|DQ580637|Homo	431.837	-0.0839752	0.843459	-0.0995605	0.920693	0.960199	778.379	98.6562	455.329	136.647	696.631	425.377
267	hsa_piR_013194|gb|DQ587886|Homo	358.822	-0.041114	0.416485	-0.0987167	0.921363	0.960199	382.749	380.631	327.234	426.415	434.777	201.124
265	hsa_piR_003384|gb|DQ574582|Homo	376.186	0.066768	0.684911	0.0974842	0.922342	0.960199	166.533	253.288	681.918	526.235	447.129	182.017
283	hsa_piR_001168|gb|DQ571524|Homo	17.6353	0.197961	2.13142	0.0928773	0.926001	NA	25.762	4.89783	18.8375	0	0	56.3146
292	hsa_piR_008547|gb|DQ581601|Homo	31.368	-0.0736475	0.80168	-0.0918665	0.926804	NA	30.3623	30.7863	35.5222	53.3019	27.1736	11.0618
270	hsa_piR_020450|gb|DQ598104|Homo	1732.76	0.0483983	0.555053	0.0871959	0.930516	0.962226	1004.72	1764.62	2342.31	1023.4	1264.81	2996.74
269	hsa_piR_004923|gb|DQ576771|Homo	58.095	0.06214	0.719608	0.0863526	0.931186	0.962226	24.8419	44.0805	101.723	61.0549	44.4658	72.4045
315	hsa_piR_020362|gb|DQ597968|Homo	24.2801	-0.0743376	1.00246	-0.0741553	0.940887	NA	33.1225	4.19814	37.1368	17.4442	29.6439	24.1348
295	hsa_piR_011181|gb|DQ585088|Homo	32.1764	0.0951419	1.3786	0.0690135	0.944979	NA	55.2042	27.9876	10.7643	38.765	0	60.3371
273	hsa_piR_012734|gb|DQ587229|Homo	41.3186	-0.0519489	0.77949	-0.0666448	0.946864	0.971009	35.8827	31.486	59.7418	69.777	14.8219	36.2023
274	hsa_piR_014620|gb|DQ590013|Homo	337.615	-0.052235	0.811902	-0.0643365	0.948702	0.971009	263.14	172.124	596.342	106.604	197.626	689.854
272	hsa_piR_007525|gb|DQ580257|Homo	281.387	-0.177264	3.08984	-0.0573701	0.95425	0.971009	0	159.529	736.277	0	563.234	229.281
275	hsa_piR_014632|gb|DQ590026|Homo	331.58	0.0362142	0.647505	0.0559289	0.955398	0.971009	303.623	115.449	562.434	213.207	407.603	387.163
271	hsa_piR_002442|gb|DQ573294|Homo	68.3329	-0.105904	1.96818	-0.0538081	0.957088	0.971009	0	140.638	72.1207	129.863	0	67.3764
276	hsa_piR_000441|gb|DQ570540|Homo	118.455	-0.0204697	0.452922	-0.0451948	0.963952	0.97443	163.772	109.152	85.0379	93.036	125.987	133.747
293	hsa_piR_009051|gb|DQ582264|Homo	14.2559	0.0415205	0.925788	0.0448488	0.964228	NA	7.36056	14.6935	20.4522	15.506	7.41097	20.1124
308	hsa_piR_018716|gb|DQ595728|Homo	29.0548	-0.0391633	0.899826	-0.0435231	0.965285	NA	30.3623	15.3932	41.4425	10.6604	54.3471	22.1236
316	hsa_piR_020363|gb|DQ597970|Homo	16.0073	-0.0452858	1.07439	-0.0421502	0.966379	NA	22.0817	2.79876	23.6814	11.6295	19.7626	16.0899
313	hsa_piR_019521|gb|DQ596805|Homo	19.8221	0.0508904	1.56811	0.0324533	0.974111	NA	20.2415	8.39628	30.14	4.84562	0	55.309
278	hsa_piR_008921|gb|DQ582102|Homo	18098.9	-0.0129453	0.474128	-0.0273034	0.978218	0.984453	13634.5	19256.2	21648.6	24619.6	20918.7	8515.58
277	hsa_piR_001205|gb|DQ571589|Homo	78.7684	-0.0132382	0.553659	-0.0239105	0.980924	0.984453	115.929	54.5758	67.815	64.9314	61.7581	107.601
299	hsa_piR_013359|gb|DQ588112|Homo	16.384	0.0179531	0.907236	0.0197888	0.984212	NA	11.0408	11.195	26.9107	25.1972	9.88129	14.0787
279	hsa_piR_007411|gb|DQ580097|Homo	49675.9	0.00732364	0.583777	0.0125453	0.989991	0.989991	57816.3	37686.7	53147.1	86998.3	44352.2	18054.9
302	hsa_piR_015875|gb|DQ591696|Homo	124.917	-0.220322	2.01758	-0.109201	NA	NA	158.252	60.1733	185.146	0	0	345.933
