# Supplementary material for: Blood Plasma Small Non-Coding RNAs as Diagnostic Molecules of Progesterone Receptor-Negative Phenotype of Serous Ovarian Tumors
Source: Preprints.org preprint supplement (doi:10.20944/preprints202307.1155.v1), 2023-07-18
Supplement: Supplementary file 3 [file TableS3.xlsx]

## Sheet: Sheet 1
Column1	Column2	Column3	Column4	Column5	Column6	Column7	Column8	Column9	Column10	Column11	Column12	Column13	Column14	Column15	Column16	Column17	Column18	Column19	Column20	Column21	Column22	Column23	Column24
	miR-134-5p	miR-199a-5p	miR-139-5p	miR-214-3p	miR-424-3p	miR-424-5p	miR-125b-5p	piR_009295	piR_020813	piR_004307	piR_019914	piR_022437	miR-16-5p	miR-17-5p	miR-20a-5p	miR-93-5p	MMP7_mRNA	MMP9_mRNA	MUC16_mRNA	PGR_mRNA	CA125	PGR_Protein	Diagnosis
miR-134-5p	1	0.55	0.19	0.49	0.44	0.32	0.32	0.19	0.35	0.19	0.19	0.41	-0.07	0.02	0.06	-0.04	-0.11	0	-0.22	0.32	-0.3	0.21	-0.21
miR-199a-5p	0.55	1	0.51	0.93	0.61	0.56	0.65	0.17	0.29	0.04	0.19	0.15	-0.07	-0.1	-0.08	-0.23	-0.15	-0.15	-0.38	0.46	-0.42	0.49	-0.48
miR-139-5p	0.19	0.51	1	0.45	0.42	0.31	0.49	0.31	0.23	0.31	0.31	0.17	0.27	0.04	0.06	-0.1	-0.3	0.15	-0.43	0.1	-0.03	-0.02	-0.03
miR-214-3p	0.49	0.93	0.45	1	0.66	0.67	0.65	0.12	0.2	-0.03	0.13	0.13	-0.24	-0.24	-0.22	-0.38	-0.23	-0.23	-0.49	0.58	-0.55	0.58	-0.6
miR-424-3p	0.44	0.61	0.42	0.66	1	0.88	0.61	0.38	0.36	0.28	0.42	0.47	-0.06	0.03	0.02	-0.1	-0.28	-0.13	-0.42	0.48	-0.3	0.37	-0.22
miR-424-5p	0.32	0.56	0.31	0.67	0.88	1	0.6	0.31	0.33	0.13	0.33	0.3	-0.14	0	-0.07	-0.14	-0.24	-0.26	-0.4	0.57	-0.41	0.51	-0.31
miR-125b-5p	0.32	0.65	0.49	0.65	0.61	0.6	1	0.09	0.33	-0.02	0.17	0.03	-0.09	-0.13	-0.09	-0.3	-0.35	-0.31	-0.41	0.58	-0.37	0.47	-0.42
piR_009295	0.19	0.17	0.31	0.12	0.38	0.31	0.09	1	0.64	0.84	0.94	0.62	0.54	0.62	0.61	0.51	-0.09	0.07	-0.05	-0.14	0.15	-0.24	0.38
piR_020813	0.35	0.29	0.23	0.2	0.36	0.33	0.33	0.64	1	0.62	0.69	0.52	0.55	0.66	0.66	0.52	-0.04	0.03	0.07	0.06	0.11	-0.05	0.23
piR_004307	0.19	0.04	0.31	-0.03	0.28	0.13	-0.02	0.84	0.62	1	0.87	0.68	0.62	0.64	0.59	0.52	-0.01	0.29	-0.04	-0.24	0.25	-0.43	0.52
piR_019914	0.19	0.19	0.31	0.13	0.42	0.33	0.17	0.94	0.69	0.87	1	0.7	0.56	0.65	0.61	0.51	-0.1	0.02	-0.07	-0.1	0.16	-0.26	0.41
piR_022437	0.41	0.15	0.17	0.13	0.47	0.3	0.03	0.62	0.52	0.68	0.7	1	0.39	0.42	0.38	0.42	-0.3	0.08	-0.14	-0.08	0.01	-0.17	0.23
miR-16-5p	-0.07	-0.07	0.27	-0.24	-0.06	-0.14	-0.09	0.54	0.55	0.62	0.56	0.39	1	0.79	0.78	0.83	0.04	0.43	0.12	-0.55	0.57	-0.56	0.68
miR-17-5p	0.02	-0.1	0.04	-0.24	0.03	0	-0.13	0.62	0.66	0.64	0.65	0.42	0.79	1	0.95	0.91	0.2	0.27	0.2	-0.43	0.47	-0.48	0.71
miR-20a-5p	0.06	-0.08	0.06	-0.22	0.02	-0.07	-0.09	0.61	0.66	0.59	0.61	0.38	0.78	0.95	1	0.88	0.14	0.23	0.18	-0.42	0.46	-0.47	0.66
miR-93-5p	-0.04	-0.23	-0.1	-0.38	-0.1	-0.14	-0.3	0.51	0.52	0.52	0.51	0.42	0.83	0.91	0.88	1	0.21	0.31	0.33	-0.6	0.57	-0.57	0.75
MMP7_mRNA	-0.11	-0.15	-0.3	-0.23	-0.28	-0.24	-0.35	-0.09	-0.04	-0.01	-0.1	-0.3	0.04	0.2	0.14	0.21	1	0.32	0.67	-0.23	0.26	-0.22	0.29
MMP9_mRNA	0	-0.15	0.15	-0.23	-0.13	-0.26	-0.31	0.07	0.03	0.29	0.02	0.08	0.43	0.27	0.23	0.31	0.32	1	0.23	-0.52	0.38	-0.53	0.44
MUC16_mRNA	-0.22	-0.38	-0.43	-0.49	-0.42	-0.4	-0.41	-0.05	0.07	-0.04	-0.07	-0.14	0.12	0.2	0.18	0.33	0.67	0.23	1	-0.34	0.24	-0.28	0.25
PGR_mRNA	0.32	0.46	0.1	0.58	0.48	0.57	0.58	-0.14	0.06	-0.24	-0.1	-0.08	-0.55	-0.43	-0.42	-0.6	-0.23	-0.52	-0.34	1	-0.66	0.76	-0.75
CA125	-0.3	-0.42	-0.03	-0.55	-0.3	-0.41	-0.37	0.15	0.11	0.25	0.16	0.01	0.57	0.47	0.46	0.57	0.26	0.38	0.24	-0.66	1	-0.74	0.79
PGR_Protein	0.21	0.49	-0.02	0.58	0.37	0.51	0.47	-0.24	-0.05	-0.43	-0.26	-0.17	-0.56	-0.48	-0.47	-0.57	-0.22	-0.53	-0.28	0.76	-0.74	1	-0.84
Diagnosis	-0.21	-0.48	-0.03	-0.6	-0.22	-0.31	-0.42	0.38	0.23	0.52	0.41	0.23	0.68	0.71	0.66	0.75	0.29	0.44	0.25	-0.75	0.79	-0.84	1

## Sheet: Sheet 2
Column1	Column2	Column3	Column4	Column5	Column6	Column7	Column8	Column9	Column10	Column11	Column12	Column13	Column14	Column15	Column16	Column17	Column18	Column19	Column20	Column21	Column22	Column23	Column24
	miR-134-5p	miR-199a-5p	miR-139-5p	miR-214-3p	miR-424-3p	miR-424-5p	miR-125b-5p	piR_009295	piR_020813	piR_004307	piR_019914	piR_022437	miR-16-5p	miR-17-5p	miR-20a-5p	miR-93-5p	MMP7_mRNA	MMP9_mRNA	MUC16_mRNA	PGR_mRNA	CA125	PGR_Protein	Diagnosis
miR-134-5p	0	5e-04	0.2521	0.0022	0.0067	0.0496	0.049	0.2532	0.0304	0.2471	0.2537	0.0115	0.6862	0.9196	0.7184	0.8013	0.5012	0.9822	0.1829	0.0543	0.0627	0.2024	0.2064
miR-199a-5p	5e-04	0	0.0014	0	1e-04	3e-04	0	0.3154	0.0783	0.8339	0.2537	0.3787	0.6613	0.5354	0.6301	0.172	0.3603	0.354	0.0199	0.0038	0.0081	0.0019	0.0023
miR-139-5p	0.2521	0.0014	0	0.0048	0.0095	0.0598	0.002	0.0611	0.1573	0.0603	0.0566	0.2922	0.1053	0.7921	0.7008	0.5362	0.065	0.3589	0.008	0.5371	0.85	0.908	0.8613
miR-214-3p	0.0022	0	0.0048	0	0	0	0	0.4755	0.228	0.8585	0.4466	0.4498	0.1461	0.1449	0.1772	0.0208	0.1569	0.1691	0.0022	2e-04	4e-04	1e-04	1e-04
miR-424-3p	0.0067	1e-04	0.0095	0	0	0	1e-04	0.0179	0.0278	0.086	0.0091	0.0033	0.7272	0.8441	0.9123	0.5302	0.0878	0.4403	0.0089	0.0024	0.0645	0.0236	0.1767
miR-424-5p	0.0496	3e-04	0.0598	0	0	0	1e-04	0.0623	0.0419	0.4317	0.0407	0.0694	0.4111	0.9895	0.6814	0.4073	0.1453	0.1182	0.0127	3e-04	0.0098	0.0011	0.0621
miR-125b-5p	0.049	0	0.002	0	1e-04	1e-04	0	0.5787	0.0428	0.8854	0.3034	0.874	0.5941	0.4348	0.5932	0.0632	0.0307	0.0627	0.0103	2e-04	0.0234	0.0027	0.0085
piR_009295	0.2532	0.3154	0.0611	0.4755	0.0179	0.0623	0.5787	0	0	0	0	1e-04	5e-04	0	1e-04	0.0013	0.5959	0.6881	0.755	0.3896	0.369	0.1478	0.019
piR_020813	0.0304	0.0783	0.1573	0.228	0.0278	0.0419	0.0428	0	0	0	0	0.001	4e-04	0	0	0.001	0.7942	0.8771	0.692	0.6988	0.5072	0.7695	0.174
piR_004307	0.2471	0.8339	0.0603	0.8585	0.086	0.4317	0.8854	0	0	0	0	0	0	0	1e-04	9e-04	0.9311	0.079	0.8267	0.1514	0.1295	0.0065	8e-04
piR_019914	0.2537	0.2537	0.0566	0.4466	0.0091	0.0407	0.3034	0	0	0	0	0	3e-04	0	1e-04	0.0013	0.5546	0.8978	0.6833	0.5662	0.3454	0.1206	0.0114
piR_022437	0.0115	0.3787	0.2922	0.4498	0.0033	0.0694	0.874	1e-04	0.001	0	0	0	0.0172	0.009	0.0203	0.0091	0.0671	0.6414	0.3999	0.6339	0.9662	0.3004	0.1646
miR-16-5p	0.6862	0.6613	0.1053	0.1461	0.7272	0.4111	0.5941	5e-04	4e-04	0	3e-04	0.0172	0	0	0	0	0.8094	0.0074	0.4763	5e-04	2e-04	3e-04	0
miR-17-5p	0.9196	0.5354	0.7921	0.1449	0.8441	0.9895	0.4348	0	0	0	0	0.009	0	0	0	0	0.2379	0.0962	0.2233	0.0074	0.0028	0.0025	0
miR-20a-5p	0.7184	0.6301	0.7008	0.1772	0.9123	0.6814	0.5932	1e-04	0	1e-04	1e-04	0.0203	0	0	0	0	0.3888	0.1597	0.269	0.0084	0.0037	0.0031	0
miR-93-5p	0.8013	0.172	0.5362	0.0208	0.5302	0.4073	0.0632	0.0013	0.001	9e-04	0.0013	0.0091	0	0	0	0	0.2031	0.0615	0.0448	1e-04	2e-04	2e-04	0
MMP7_mRNA	0.5012	0.3603	0.065	0.1569	0.0878	0.1453	0.0307	0.5959	0.7942	0.9311	0.5546	0.0671	0.8094	0.2379	0.3888	0.2031	0	0.0484	0	0.1613	0.1192	0.1781	0.0723
MMP9_mRNA	0.9822	0.354	0.3589	0.1691	0.4403	0.1182	0.0627	0.6881	0.8771	0.079	0.8978	0.6414	0.0074	0.0962	0.1597	0.0615	0.0484	0	0.1625	9e-04	0.0185	5e-04	0.0061
MUC16_mRNA	0.1829	0.0199	0.008	0.0022	0.0089	0.0127	0.0103	0.755	0.692	0.8267	0.6833	0.3999	0.4763	0.2233	0.269	0.0448	0	0.1625	0	0.0394	0.1418	0.092	0.1278
PGR_mRNA	0.0543	0.0038	0.5371	2e-04	0.0024	3e-04	2e-04	0.3896	0.6988	0.1514	0.5662	0.6339	5e-04	0.0074	0.0084	1e-04	0.1613	9e-04	0.0394	0	0	0	0
CA125	0.0627	0.0081	0.85	4e-04	0.0645	0.0098	0.0234	0.369	0.5072	0.1295	0.3454	0.9662	2e-04	0.0028	0.0037	2e-04	0.1192	0.0185	0.1418	0	0	0	0
PGR_Protein	0.2024	0.0019	0.908	1e-04	0.0236	0.0011	0.0027	0.1478	0.7695	0.0065	0.1206	0.3004	3e-04	0.0025	0.0031	2e-04	0.1781	5e-04	0.092	0	0	0	0
Diagnosis	0.2064	0.0023	0.8613	1e-04	0.1767	0.0621	0.0085	0.019	0.174	8e-04	0.0114	0.1646	0	0	0	0	0.0723	0.0061	0.1278	0	0	0	0
