# Supplementary material for: Blood Plasma Small Non-Coding RNAs as Diagnostic Molecules of Progesterone Receptor-Negative Phenotype of Serous Ovarian Tumors
Source: Preprints.org preprint supplement (doi:10.20944/preprints202307.1155.v1), 2023-07-18
Supplement: Supplementary file 4 [file TableS4.xlsx]

## Sheet: Sheet1
Primary	query	match_string	ref	Seq1	Seq2	Tot_Score	Tot_Energy	seq1_start	seq1_end	seq2_start	seq2_end	length	seq1_match	seq2_match	match_2_11	match_12_21
1320	uaGGUGGGCGGAGUCGGAGGGUUUCAu	|||||: |||||||||||||||||	ttCCACCTACCTCAGCCTCCCAAAGTg	>hsa_piR_022437|gb|DQ600690|Homo	NM_000020.3	213	-51.86	2	26	2787	2813	24	0.9167	0.9583	||||||||||	|: |||||||
1321	uaGGUGGGCGGAGUCGGAGGGUUUCAu	||:||| :||||||||||||||||	atCCGCCCATCTCAGCCTCCCAAAGTt	>hsa_piR_022437|gb|DQ600690|Homo	NM_000026.4	209	-52.1	2	26	2368	2394	24	0.875	0.9583	||||||||||	|| :||||||
1322	uaGGUGGGCGGAGUCGGAGGGUUUCAu	|||||:|||||:||||||||||||	atCCACCTGCCTCGGCCTCCCAAAGTg	>hsa_piR_022437|gb|DQ600690|Homo	NM_000030.3	217	-58.38	2	26	2149	2175	24	0.9167	1	||||||||||	|:|||||:||
1323	uaGGUGGGCGGAGUCGGAGGGUUUCAu	||:||:|||||:||||||||||||	atCCGCCTGCCTCGGCCTCCCAAAGTg	>hsa_piR_022437|gb|DQ600690|Homo	NM_000049.4	213	-57.91	2	26	2760	2786	24	0.875	1	||||||||||	|:|||||:||
1324	uaGGUGGGCGGAGUCGGAGGGUUUCAu	|||||| ||||:||||||||||||	atCCACCCTCCTCGGCCTCCCAAAGTg	>hsa_piR_022437|gb|DQ600690|Homo	NM_000051.4	213	-54.95	2	26	11039	11065	24	0.9167	0.9583	||||||||||	|| ||||:||
1325	uaGGUGGGCGGAGUCGGAGGGUUUCAu	||||||||||::||||||||||||	atCCACCCGCCTTGGCCTCCCAAAGTg	>hsa_piR_022437|gb|DQ600690|Homo	NM_000052.7	217	-56.9	2	26	5907	5933	24	0.9167	1	||||||||||	||||||::||
1326	uaGGUGGGCGGAGUCGGAGGGUUUCAu	|||:|:||||||||||||||||||	atCCATCTGCCTCAGCCTCCCAAAGTg	>hsa_piR_022437|gb|DQ600690|Homo	NM_000059.4	217	-56.68	2	26	11711	11737	24	0.9167	1	||||||||||	|:||||||||
1327	uaGGUGGGCGGAGUCGGAGGGUUUCAu	||:|||||||||||||||||||||	atCCGCCCGCCTCAGCCTCCCAAAGTg	>hsa_piR_022437|gb|DQ600690|Homo	NM_000073.3	221	-61.36	2	26	1299	1325	24	0.9583	1	||||||||||	||||||||||
1328	uaGGUGGGCGGAGUCGGAGGGUUUCAu	||||||||||:: |||||||||||	atCCACCCGCCTTGACCTCCCAAAGTg	>hsa_piR_022437|gb|DQ600690|Homo	NM_000073.3	209	-52.88	2	26	2102	2128	24	0.875	0.9583	||||||||||	||||||:: |
1329	uaGGUGGGCGGAGUCGGAGGGUUUCAu	||||| |||||:||||||||||||	atCCACCAGCCTCGGCCTCCCAAAGTg	>hsa_piR_022437|gb|DQ600690|Homo	NM_000082.4	213	-53.62	2	26	5445	5471	24	0.9167	0.9583	||||||||||	| |||||:||
1330	uaGGUGGGCGGAGUCGGAGGGUUUCAu	|::|||||||:: |||||||||||	atCTGCCCGCCTTGACCTCCCAAAGTg	>hsa_piR_022437|gb|DQ600690|Homo	NM_000082.4	201	-47.72	2	26	7909	7935	24	0.7917	0.9583	||||||||||	||||||:: |
1331	uaGGUGGGCGGAGUCGGAGGGUUUCAu	|||||| :|||:||||||||||||	atCCACCCATCTCGGCCTCCCAAAGTg	>hsa_piR_022437|gb|DQ600690|Homo	NM_000084.5	209	-53.33	2	26	6798	6824	24	0.875	0.9583	||||||||||	|| :|||:||
1332	uaGGUGGGCGGAGUCGGAGGGUUUCAu	|||||:||||| ||||||||||||	atCCACCTGCCTCTGCCTCCCAAAGTg	>hsa_piR_022437|gb|DQ600690|Homo	NM_000127.3	213	-54.69	2	26	7158	7184	24	0.9167	0.9583	||||||||||	|:||||| ||
1333	uaGGUGGGCGGAGUCGGAGGGUUUCAu	:| ||:|||||||:||||||||||	atTCTCCTGCCTCAGTCTCCCAAAGTg	>hsa_piR_022437|gb|DQ600690|Homo	NM_000140.5	205	-49.52	2	26	4037	4063	24	0.8333	0.9583	||||||||||	|:|||||||:
1334	uaGGUGGGCGGAGUCGGAGGGUUUCAu	|||||:||||| ||||||||||||	atCCACCTGCCTCCGCCTCCCAAAGTg	>hsa_piR_022437|gb|DQ600690|Homo	NM_000144.5	213	-53.62	2	26	5053	5079	24	0.9167	0.9583	||||||||||	|:||||| ||
1335	uaGGUGGGCGGAGUCGGAGGGUUUCAu	|||||:|:||::||||||||||||	atCCACCTGTCTTGGCCTCCCAAAGTg	>hsa_piR_022437|gb|DQ600690|Homo	NM_000148.3	209	-51.81	2	26	2863	2889	24	0.8333	1	||||||||||	|:|:||::||
1336	uaGGUGGGCGGAGUCGGAGGGUUUCAu	|| ||:||||||||||||||||||	atCCTCCTGCCTCAGCCTCCCAAAGTg	>hsa_piR_022437|gb|DQ600690|Homo	NM_000151.4	213	-54.64	2	26	3900	3926	24	0.9167	0.9583	||||||||||	|:||||||||
1337	uaGGUGGGCGGAGUCGGAGGGUUUCAu	||||||| |||:||||||||||||	atCCACCCGACTCGGCCTCCCAAAGTg	>hsa_piR_022437|gb|DQ600690|Homo	NM_000163.5	213	-54.69	2	26	4184	4210	24	0.9167	0.9583	||||||||||	||| |||:||
1338	uaGGUGGGCGGAGUCGGAGGGUUUCAu	|||||| |||||||||||||||||	atCCACCCACCTCAGCCTCCCAAAGTg	>hsa_piR_022437|gb|DQ600690|Homo	NM_000164.4	217	-55.99	2	26	2370	2396	24	0.9583	0.9583	||||||||||	|| |||||||
1339	uaGGUGGGCGGAGUCGGAGGGUUUCAu	||:|||||||||||||||||||||	atCCGCCCGCCTCAGCCTCCCAAAGTg	>hsa_piR_022437|gb|DQ600690|Homo	NM_000175.5	221	-61.36	2	26	3172	3198	24	0.9583	1	||||||||||	||||||||||
1340	uaGGUGGGCGGAGUCGGAGGGUUUCAu	||:||:||:|::||||||||||||	atCCGCCTGCTTTGGCCTCCCAAAGTg	>hsa_piR_022437|gb|DQ600690|Homo	NM_000175.5	205	-50.69	2	26	3760	3786	24	0.7917	1	||||||||||	|:||:|::||
1341	uaGGUGGGCGGAGUCGGAGGGUUUCAu	|| ||||||||:||||||||||||	atCCTCCCGCCTCGGCCTCCCAAAGTg	>hsa_piR_022437|gb|DQ600690|Homo	NM_000212.3	213	-56.79	2	26	5786	5812	24	0.9167	0.9583	||||||||||	|||||||:||
1342	uaGGUGGGCGGAGUCGGAGGGUUUCAu	|| ||| |||||||||||||||||	atCCTCCCACCTCAGCCTCCCAAAGTg	>hsa_piR_022437|gb|DQ600690|Homo	NM_000215.4	209	-51.6	2	26	4006	4032	24	0.9167	0.9167	||||||||||	|| |||||||
1343	uaGGUGGGCGGAGUCGGAGGGUUUCAu	|::||||:|||:||||||||||||	atCTGCCCGTCTCGGCCTCCCAAAGTg	>hsa_piR_022437|gb|DQ600690|Homo	NM_000215.4	209	-53.73	2	26	4488	4514	24	0.8333	1	||||||||||	|||:|||:||
1344	uaGGUGGGCGGAGUCGGAGGGUUUCAu	|::||:||||::||||||||||||	atCTGCCTGCCTTGGCCTCCCAAAGTg	>hsa_piR_022437|gb|DQ600690|Homo	NM_000232.5	205	-48.94	2	26	3517	3543	24	0.7917	1	||||||||||	|:||||::||
1345	uaGGUGGGCGGAGUCGGAGGGUUUCAu	|||||| ||||:||||||||||||	atCCACCCACCTCGGCCTCCCAAAGTg	>hsa_piR_022437|gb|DQ600690|Homo	NM_000239.3	213	-55.34	2	26	983	1009	24	0.9167	0.9583	||||||||||	|| ||||:||
1346	uaGGUGGGCGGAGUCGGAGGGUUUCAu	||||||||||||||||||||||||	atCCACCCGCCTCAGCCTCCCAAAGTg	>hsa_piR_022437|gb|DQ600690|Homo	NM_000243.3	225	-61.83	2	26	3085	3111	24	1	1	||||||||||	||||||||||
1347	uagGUGGGCGGAGUCGGAGGGUUUCAu	||||| |||||||||||||||||	atgCACCCACCTCAGCCTCCCAAAGTg	>hsa_piR_022437|gb|DQ600690|Homo	NM_000243.3	212	-51.2	2	25	3392	3418	23	0.9565	0.9565	||||||||||	|| |||||||
1348	uaGGUGGGCGGAGUCGGAGGGUUUCAu	|||||| |||||||||||||||||	atCCACCCACCTCAGCCTCCCAAAGTg	>hsa_piR_022437|gb|DQ600690|Homo	NM_000245.4	217	-55.99	2	26	5303	5329	24	0.9583	0.9583	||||||||||	|| |||||||
1349	uaGGUGGGCGGAGUCGGAGGGUUUCAu	|||||| |||||||||||||||||	atCCACCCACCTCAGCCTCCCAAAGTg	>hsa_piR_022437|gb|DQ600690|Homo	NM_000246.3	217	-55.99	2	26	4143	4169	24	0.9583	0.9583	||||||||||	|| |||||||
1350	uaGGUGGGCGGAGUCGGAGGGUUUCAu	|::||| ||||:||||||||||||	atCTGCCCACCTCGGCCTCCCAAAGTg	>hsa_piR_022437|gb|DQ600690|Homo	NM_000268.4	205	-50.18	2	26	5157	5183	24	0.8333	0.9583	||||||||||	|| ||||:||
1351	uaGGUGGGCGGAGUCGGAGGGUUUCAu	||:||:||||||||||||||||||	atCCGCCTGCCTCAGCCTCCCAAAGTg	>hsa_piR_022437|gb|DQ600690|Homo	NM_000294.3	217	-58.56	2	26	2518	2544	24	0.9167	1	||||||||||	|:||||||||
1352	uaGGUGGGCGGAGUCGGAGGGUUUCAu	|||||:|| |||||||||||||||	atCCACCTGCGTCAGCCTCCCAAAGTg	>hsa_piR_022437|gb|DQ600690|Homo	NM_000318.3	213	-53.86	2	26	1837	1863	24	0.9167	0.9583	||||||||||	|:|| |||||
1353	uaGGUGGGCGGAGUCGGAGGGUUUCAu	|| ||: || ::||||||||||||	gtCCTCCTACCCTGGCCTCCCAAAGTt	>hsa_piR_022437|gb|DQ600690|Homo	NM_000318.3	189	-39.51	2	26	3178	3204	24	0.75	0.875	||||||||||	|: || ::||
1354	uaGGUGGGCGGAGUCGGAGGGUUUCAu	|||||| ||||:|:||||||||||	atCCACCCACCTCGGTCTCCCAAAGTg	>hsa_piR_022437|gb|DQ600690|Homo	NM_000339.3	209	-53.05	2	26	3865	3891	24	0.875	0.9583	||||||||||	|| ||||:|:
1355	uaGGUGGGCGGAGUCGGAGGGUUUCAu	|:|||| ||||:||||||||||||	atCTACCCACCTCGGCCTCCCAAAGTg	>hsa_piR_022437|gb|DQ600690|Homo	NM_000367.5	209	-52.63	2	26	1433	1459	24	0.875	0.9583	||||||||||	|| ||||:||
1356	uaGGUGGGCGGAGUC-GGAGGGUUUCAu	|| |:: ::|:|| ||||||||||	ttCCTCTTATTTTAGAGCTCCCAAAGTg	>hsa_piR_022437|gb|DQ600690|Homo	NM_000373.4	172	-32.39	2	26	4226	4253	25	0.64	0.84	||||||||||	: ::|:||
1357	uaGGUGGGCGGAGUCGGAGGGUUUCAu	||:||||||||:||||||||||||	atCCGCCCGCCTCGGCCTCCCAAAGTg	>hsa_piR_022437|gb|DQ600690|Homo	NM_000398.7	217	-60.71	2	26	2440	2466	24	0.9167	1	||||||||||	|||||||:||
1358	uaGGUGGGCGGAGUCGGAGGGUUUCAu	|| ||:||||::||||||||||||	atCCTCCTGCCTTGGCCTCCCAAAGTg	>hsa_piR_022437|gb|DQ600690|Homo	NM_000400.4	205	-49.71	2	26	3745	3771	24	0.8333	0.9583	||||||||||	|:||||::||
1359	uaGGUGGGCGGAGUCGGAGGGUUUCAu	|||||||||||:||||||||||||	atCCACCCGCCTCGGCCTCCCAAAGTg	>hsa_piR_022437|gb|DQ600690|Homo	NM_000434.4	221	-61.18	2	26	2624	2650	24	0.9583	1	||||||||||	|||||||:||
1360	uaGGUGGGCGGAGUCGGAGGGUUUCAu	|| ||:||||||||||||||||||	atCCTCCTGCCTCAGCCTCCCAAAGTg	>hsa_piR_022437|gb|DQ600690|Homo	NM_000440.3	213	-54.64	2	26	5045	5071	24	0.9167	0.9583	||||||||||	|:||||||||
1361	uaGGUGGGCGGAGUCGGAGGGUUUCAu	|||||:|||||:||||||||||||	atCCACCTGCCTCGGCCTCCCAAAGTg	>hsa_piR_022437|gb|DQ600690|Homo	NM_000453.3	217	-58.38	2	26	2818	2844	24	0.9167	1	||||||||||	|:|||||:||
1362	uaGGUGGGCGGAGUCGGAGGGUUUCAu	|| ||:|: | :|:||||||||||	gtCCTCCTGTGTAGGTCTCCCAAAGTg	>hsa_piR_022437|gb|DQ600690|Homo	NM_000456.3	185	-38.24	2	26	205	231	24	0.7083	0.875	||||||||||	|:|: | :|:
1363	uaGGUGGGCGGAGUCGGAGGGUUUCAu	||||||||||||||||||||||||	atCCACCCGCCTCAGCCTCCCAAAGTg	>hsa_piR_022437|gb|DQ600690|Homo	NM_000487.6	225	-61.83	2	26	3371	3397	24	1	1	||||||||||	||||||||||
1364	uaGGUGGGCGGAGUCGGAGGGUUUCAu	||:||: ||||:||||||||||||	atCCGCCTTCCTCGGCCTCCCAAAGTg	>hsa_piR_022437|gb|DQ600690|Homo	NM_000511.6	205	-51.54	2	26	2513	2539	24	0.8333	0.9583	||||||||||	|: ||||:||
1365	uaGGUGGGCGGAGUCGGAGGGUUUCAu	||:|||||||::||||||||||||	atCCGCCCGCCTTGGCCTCCCAAAGTg	>hsa_piR_022437|gb|DQ600690|Homo	NM_000520.6	213	-56.43	2	26	2709	2735	24	0.875	1	||||||||||	||||||::||
1366	uaGGUGGGCGGAGUCGGAGGGUUUCAu	:|||::|:||::||||||||||||	gtTCACTTGTCTTGGCCTCCCAAAGTg	>hsa_piR_022437|gb|DQ600690|Homo	NM_000520.6	201	-45.94	2	26	2844	2870	24	0.75	1	||||||||||	::|:||::||
1367	uaGGUGGGCGGAGUCGGAGGGUUUCAu	||: |||||||:||||||||||||	atCCGACCGCCTCGGCCTCCCAAAGTg	>hsa_piR_022437|gb|DQ600690|Homo	NM_000535.7	209	-54.63	2	26	4209	4235	24	0.875	0.9583	||||||||||	|||||||:||
1368	uaGGUGGGCGGAGUCGGAGGGUUUCAu	|||||| |||||||||||||||||	atCCACCCACCTCAGCCTCCCAAAGTg	>hsa_piR_022437|gb|DQ600690|Homo	NM_000551.4	217	-55.99	2	26	3476	3502	24	0.9583	0.9583	||||||||||	|| |||||||
1369	uaGGUGGGCGGAGUCGGAGGGUUUCAu	||:||||||||:||||||||||||	atCCGCCCGCCTCGGCCTCCCAAAGTg	>hsa_piR_022437|gb|DQ600690|Homo	NM_000554.6	217	-60.71	2	26	1684	1710	24	0.9167	1	||||||||||	|||||||:||
1370	uaGGUGGGCGGAGUCGGAGGGUUUCAu	||:||:|||||:||||||||||||	atCCGCCTGCCTCGGCCTCCCAAAGTg	>hsa_piR_022437|gb|DQ600690|Homo	NM_000554.6	213	-57.91	2	26	1995	2021	24	0.875	1	||||||||||	|:|||||:||
1371	uaGGUGGGCGGAGUCGGAGGGUUUCAu	|::||| ||||:||||||||||||	atCTGCCCACCTCGGCCTCCCAAAGTg	>hsa_piR_022437|gb|DQ600690|Homo	NM_000555.3	205	-50.18	2	26	6654	6680	24	0.8333	0.9583	||||||||||	|| ||||:||
1372	uaGGUGGGCGGAGUCGGAGGGUUUCAu	||:||| :||| |:||||||||||	atCCGCCCATCTCCGTCTCCCAAAGTg	>hsa_piR_022437|gb|DQ600690|Homo	NM_000578.4	197	-45.81	2	26	2406	2432	24	0.7917	0.9167	||||||||||	|| :||| |:
1373	uaGGUGGGCGGAGUCGGAGGGUUUCAu	||:||:||||::||||||||||||	atCCGCCTGCCTTGGCCTCCCAAAGTg	>hsa_piR_022437|gb|DQ600690|Homo	NM_000587.4	209	-53.63	2	26	3456	3482	24	0.8333	1	||||||||||	|:||||::||
1374	uaGGUGGGCGGAGUCGGAGGGUUUCAu	|||| | |||||||||||||||||	atCCACGCACCTCAGCCTCCCAAAGTg	>hsa_piR_022437|gb|DQ600690|Homo	NM_000620.5	209	-50.61	2	26	8306	8332	24	0.9167	0.9167	||||||||||	| |||||||
1375	uaGGUGGGCGGAGUCGGAGGGUUUCAu	||||||||:||:||||||||||||	ctCCACCCGCTTCGGCCTCCCAAAGTt	>hsa_piR_022437|gb|DQ600690|Homo	NM_000629.3	217	-55.62	2	26	3978	4004	24	0.9167	1	||||||||||	||||:||:||
1376	uaGGUGGGCGGAGUCGGAGGGUUUCAu	|||||| |||||||||||||||||	atCCACCCACCTCAGCCTCCCAAAGTg	>hsa_piR_022437|gb|DQ600690|Homo	NM_000636.4	217	-55.99	2	26	4931	4957	24	0.9583	0.9583	||||||||||	|| |||||||
1377	uaGGUGGGCGGAGUCGGAGGGUUUCAu	||::|:| ||||||||||||||||	atCCGTCTGGCTCAGCCTCCCAAAGTg	>hsa_piR_022437|gb|DQ600690|Homo	NM_000636.4	205	-51.05	2	26	2522	2548	24	0.8333	0.9583	||||||||||	|:| ||||||
1378	uaGGUGGGCGGAGUCGGAGGGUUUCAu	|| ||:|||||:||||||||||||	atCCTCCTGCCTCGGCCTCCCAAAGTg	>hsa_piR_022437|gb|DQ600690|Homo	NM_000641.4	209	-53.99	2	26	1642	1668	24	0.875	0.9583	||||||||||	|:|||||:||
1379	uaGGUGGGCGGAGUCGGAGGGUUUCAu	|||||:|||||:||||||||||||	atCCACCTGCCTCGGCCTCCCAAAGTg	>hsa_piR_022437|gb|DQ600690|Homo	NM_000651.6	217	-58.38	2	26	8546	8572	24	0.9167	1	||||||||||	|:|||||:||
1380	uaGGUGGGCGGAGUCGGAGGGUUUCAu	||||||||||||||||||||||||	atCCACCCGCCTCAGCCTCCCAAAGTg	>hsa_piR_022437|gb|DQ600690|Homo	NM_000692.5	225	-61.83	2	26	2921	2947	24	1	1	||||||||||	||||||||||
1381	uaGGUGGGCGGAGUCGGAGGGUUUCAu	|||||:|||||:||||||||||||	acCCACCTGCCTCGGCCTCCCAAAGTg	>hsa_piR_022437|gb|DQ600690|Homo	NM_000750.5	217	-56.26	2	26	2164	2190	24	0.9167	1	||||||||||	|:|||||:||
1382	uaGGUGGGCGGAGUCGGAGGGUUUCAu	||||||||||||||||||||||||	atCCACCCGCCTCAGCCTCCCAAAGTg	>hsa_piR_022437|gb|DQ600690|Homo	NM_000761.5	225	-61.83	2	26	2579	2605	24	1	1	||||||||||	||||||||||
1383	uaGGUGGGCGGAGUCGGAGGGUUUCAu	:||||| |||:|||||||||||||	atTCACCCACCTTAGCCTCCCAAAGTg	>hsa_piR_022437|gb|DQ600690|Homo	NM_000767.5	209	-50.69	2	26	1955	1981	24	0.875	0.9583	||||||||||	|| |||:|||
1384	uaGGUGGGCGGAGUCGGAGGGUUUCAu	|::||:||||||||||||||||||	atCTGCCTGCCTCAGCCTCCCAAAGTg	>hsa_piR_022437|gb|DQ600690|Homo	NM_000769.4	213	-53.87	2	26	2369	2395	24	0.875	1	||||||||||	|:||||||||
1385	uaGGUGGGCGGAGUCGGAGGGUUUCAu	|::||:||||||||||||||||||	atCTGCCTGCCTCAGCCTCCCAAAGTg	>hsa_piR_022437|gb|DQ600690|Homo	NM_000771.4	213	-53.87	2	26	2381	2407	24	0.875	1	||||||||||	|:||||||||
1386	uaGGUGGGCGGAGUCGGAGGGUUUCAu	||||||||||::||||||||||||	atCCACCCGCCTTGGCCTCCCAAAGTg	>hsa_piR_022437|gb|DQ600690|Homo	NM_000786.4	217	-56.9	2	26	2700	2726	24	0.9167	1	||||||||||	||||||::||
1387	uaGGUGGGCGGAGUCGGAGGGUUUCAu	:||||| |||||||||||||||||	atTCACCCACCTCAGCCTCCCAAAGTg	>hsa_piR_022437|gb|DQ600690|Homo	NM_000791.4	213	-53.16	2	26	2163	2189	24	0.9167	0.9583	||||||||||	|| |||||||
1388	uaGGUGGGCGGAGUCGGAGGGUUUCAu	|||||||| |:|||||||||||||	atCCACCCGCATTAGCCTCCCAAAGTg	>hsa_piR_022437|gb|DQ600690|Homo	NM_000821.7	213	-52.15	2	26	5781	5807	24	0.9167	0.9583	||||||||||	|||| |:|||
1389	uaGGUGGGCGGAGUCGGAGGGUUUCAu	|::| :||||::||||||||||||	atCTGCATGCCTTGGCCTCCCAAAGTg	>hsa_piR_022437|gb|DQ600690|Homo	NM_000821.7	197	-43.17	2	26	6049	6075	24	0.75	0.9583	||||||||||	:||||::||
1390	uaGGUGGGCGGAGU-CGGAGGGUUUCAu	:|| | ||: || |||||||||||	atTCA-CAGCTGCACCCCTCCCAAAGTc	>hsa_piR_022437|gb|DQ600690|Homo	NM_000834.5	170	-31.04	2	26	26994	27020	25	0.72	0.8	||||||||||	||: || |
1391	uaGGUGGGCGGAGUCGGAGGGUUUCAu	|| ||:||||| |||||||||||	atCCTCCTGCCTCCACCTCCCAAAGTg	>hsa_piR_022437|gb|DQ600690|Homo	NM_000843.4	197	-46.88	2	26	5322	5348	24	0.8333	0.875	||||||||||	|:||||| |
1392	uaggugggcGGAGUCGGAGGGUUUCAu	::|||| ||||||||||	gcaatttatTTTCAGACTCCCAAAGTa	>hsa_piR_022437|gb|DQ600690|Homo	NM_000857.5	174	-28.79	2	19	2502	2528	17	0.8235	0.9412	||||||||||	::||||
1393	uaGGUGGGCGGAGUCGGAGGGUUUCAu	|||||||||||:||||||||||||	atCCACCCGCCTCGGCCTCCCAAAGTg	>hsa_piR_022437|gb|DQ600690|Homo	NM_000896.3	221	-61.18	2	26	3184	3210	24	0.9583	1	||||||||||	|||||||:||
1394	uaGGUGGGCGGAGUCGGAGGGUUUCAu	||:||: |||||||||||||||||	atCCGCCTACCTCAGCCTCCCAAAGTg	>hsa_piR_022437|gb|DQ600690|Homo	NM_000903.3	209	-52.57	2	26	1811	1837	24	0.875	0.9583	||||||||||	|: |||||||
1395	uaGGUGGGCGGAGUCGGAGGGUUUCAu	|||||| ||||:||||||||||||	atCCACCCACCTCGGCCTCCCAAAGTg	>hsa_piR_022437|gb|DQ600690|Homo	NM_000911.4	213	-55.34	2	26	8532	8558	24	0.9167	0.9583	||||||||||	|| ||||:||
1396	uaGGUGGGCGGAGUCGGAGGGUUUCAu	:| ||:||||::||||||||||||	atTCTCCTGCCTTGGCCTCCCAAAGTa	>hsa_piR_022437|gb|DQ600690|Homo	NM_000911.4	201	-46.98	2	26	5631	5657	24	0.7917	0.9583	||||||||||	|:||||::||
1397	uaGGUGGGCGGAGUCGGAGGGUUUCAu	:||||:|||||:||||||||||||	atTCACCTGCCTCGGCCTCCCAAAGTg	>hsa_piR_022437|gb|DQ600690|Homo	NM_000912.5	213	-55.55	2	26	3642	3668	24	0.875	1	||||||||||	|:|||||:||
1398	uaGGUGGGCGGAGUCGGAGGGUUUCAu	||:||||||||:||||||||||||	atCCGCCCGCCTCGGCCTCCCAAAGTg	>hsa_piR_022437|gb|DQ600690|Homo	NM_000914.5	217	-60.71	2	26	8828	8854	24	0.9167	1	||||||||||	|||||||:||
1399	uaGGUGGGCGGAGUCGGAGGGUUUCAu	|::||:|||||:||||||||||||	atCTGCCTGCCTCGGCCTCCCAAAGTg	>hsa_piR_022437|gb|DQ600690|Homo	NM_000914.5	209	-53.22	2	26	13194	13220	24	0.8333	1	||||||||||	|:|||||:||
1400	uaGGUGGGCGGAGUCGGAGGGUUUCAu	|::||||||||:||||||||||||	atCTGCCCGCCTCGGCCTCCCAAAGTg	>hsa_piR_022437|gb|DQ600690|Homo	NM_000961.4	213	-56.02	2	26	4541	4567	24	0.875	1	||||||||||	|||||||:||
1401	uaGGUGGGCGGAGUCGGAGGGUUUCAu	:::||:|||| :||||||||||||	atTTGCCTGCCTGGGCCTCCCAAAGTg	>hsa_piR_022437|gb|DQ600690|Homo	NM_000961.4	197	-46.08	2	26	4970	4996	24	0.75	0.9583	||||||||||	|:|||| :||
1402	uaGGUGGGCGGAGUCGGAGGGUUUCAu	|::|||||||||||||||||||||	atCTGCCCGCCTCAGCCTCCCAAAGTg	>hsa_piR_022437|gb|DQ600690|Homo	NM_000990.5	217	-56.67	2	26	2522	2548	24	0.9167	1	||||||||||	||||||||||
1403	uaGGUGGGCGGAGUCGGAGGGUUUCAu	|||||:||||||||||||||||||	acCCACCTGCCTCAGCCTCCCAAAGTg	>hsa_piR_022437|gb|DQ600690|Homo	NM_000991.5	221	-56.91	2	26	2568	2594	24	0.9583	1	||||||||||	|:||||||||
1404	uagguGGGCGGAGUCGGAGGGUUUCAu	||:||:|||||||||||||||	gcaatCCTGCTTCAGCCTCCCAAAGTa	>hsa_piR_022437|gb|DQ600690|Homo	NM_000994.4	202	-46.72	2	23	1379	1405	21	0.9048	1	||||||||||	|:||:|||||
1405	uaGGUGGGCGGAGUCGGAGGGUUUCAu	||: |||||||:||||||||||||	atCCG-CCGCCTCGGCCTCCCAAAGTg	>hsa_piR_022437|gb|DQ600690|Homo	NM_000997.5	203	-53.48	2	26	1811	1836	24	0.875	0.9583	||||||||||	|||||||:||
1406	uaGGUGGGCGGAGUCGGAGGGUUUCAu	|| |:| :||::||||||||||||	atCCTCTCATCTTGGCCTCCCAAAGTg	>hsa_piR_022437|gb|DQ600690|Homo	NM_000997.5	193	-41.59	2	26	2450	2476	24	0.75	0.9167	||||||||||	:| :||::||
1407	uagGUGGGCGGAGUCGGAGGGUUUCAu	|::|:||||::||||||||||||	taaCGTCTGCCTTGGCCTCCCAAAGTg	>hsa_piR_022437|gb|DQ600690|Homo	NM_000998.5	200	-46.08	2	25	2548	2574	23	0.7826	1	||||||||||	|:||||::||
1408	uaGGUGGGCGGAGUCGGAGGGUUUCAu	|||||| ||||:||||||||||||	atCCACCCACCTCGGCCTCCCAAAGTg	>hsa_piR_022437|gb|DQ600690|Homo	NM_001001342.2	213	-55.34	2	26	2374	2400	24	0.9167	0.9583	||||||||||	|| ||||:||
1409	uaGGUGGGCGGAGUCGGAGGGUUUCAu	|:|||:||||||||||||||||||	atCTACCTGCCTCAGCCTCCCAAAGTg	>hsa_piR_022437|gb|DQ600690|Homo	NM_001001413.3	217	-56.32	2	26	3370	3396	24	0.9167	1	||||||||||	|:||||||||
1410	uaGGUGGGCGGAGUCGGAGGGUUUCAu	|::|||||||::||||||||||||	atCTGCCCGCCTTGGCCTCCCAAAGTg	>hsa_piR_022437|gb|DQ600690|Homo	NM_001001436.4	209	-51.74	2	26	2156	2182	24	0.8333	1	||||||||||	||||||::||
1411	uagGUGGGCGGAGUCGGAGGGUUUCAu	| ||:| ||||||||||||||||	caaCTCCTGACTCAGCCTCCCAAAGTg	>hsa_piR_022437|gb|DQ600690|Homo	NM_001001436.4	200	-43.47	2	25	4903	4929	23	0.8696	0.913	||||||||||	|:| ||||||
1412	uaGGUGGGCGGAGUCGGAGGGUUUCAu	|::||| |||||||||||||||||	atCTGCCCACCTCAGCCTCCCAAAGTg	>hsa_piR_022437|gb|DQ600690|Homo	NM_001001481.4	209	-50.83	2	26	5007	5033	24	0.875	0.9583	||||||||||	|| |||||||
1413	uaGGUGGGCGGAGUCGGAGGGUUUCAu	|::||| |||| ||||||||||||	gtCTGCCCACCTCCGCCTCCCAAAGTg	>hsa_piR_022437|gb|DQ600690|Homo	NM_001001503.2	201	-45.11	2	26	712	738	24	0.8333	0.9167	||||||||||	|| |||| ||
1414	uaGGUGGGCGGAGUCGGAGGGUUUCAu	||:||||||||:||||||||||||	atCCGCCCGCCTCGGCCTCCCAAAGTg	>hsa_piR_022437|gb|DQ600690|Homo	NM_001001563.5	217	-60.71	2	26	2664	2690	24	0.9167	1	||||||||||	|||||||:||
1415	uaGGUGGGCGGAGUCGGAGGGUUUCAu	||||:: ||||:||||||||||||	atCCACTTACCTCGGCCTCCCAAAGTg	>hsa_piR_022437|gb|DQ600690|Homo	NM_001001935.3	205	-49.28	2	26	3920	3946	24	0.8333	0.9583	||||||||||	:: ||||:||
1416	uaGGUGGGCGGAGUCGGAGGGUUUCAu	|| ||:||||::|:||||||||||	atCCTCCTGCCTTGGTCTCCCAAAGTg	>hsa_piR_022437|gb|DQ600690|Homo	NM_001001935.3	201	-47.42	2	26	2864	2890	24	0.7917	0.9583	||||||||||	|:||||::|:
1417	uaggUGGGCGGAGUCGGAGGGUUUCAu	::|| | |:||||||||||||	ggtgGTCCAC--CGGCCTCCCAAAGTa	>hsa_piR_022437|gb|DQ600690|Homo	NM_001001935.3	172	-36.18	2	24	4635	4659	22	0.7273	0.8636	||||||||||	|| | |:||
1418	uaGGUGGGCGGAGUCGGAGGGUUUCAu	|||||| :||||||||||||||||	atCCACCCATCTCAGCCTCCCAAAGTg	>hsa_piR_022437|gb|DQ600690|Homo	NM_001001974.3	213	-53.98	2	26	2755	2781	24	0.9167	0.9583	||||||||||	|| :||||||
1419	uaGGUGGGCGGAGUCGGAGGGUUUCAu	||||||||||::||||||||||||	atCCACCCGCCTTGGCCTCCCAAAGTg	>hsa_piR_022437|gb|DQ600690|Homo	NM_001002019.3	217	-56.9	2	26	3489	3515	24	0.9167	1	||||||||||	||||||::||
1420	uaGGUGGGCGGAGUCGGAGGGUUUCAu	||||||||||::||||||||||||	atCCACCCGCCTTGGCCTCCCAAAGTg	>hsa_piR_022437|gb|DQ600690|Homo	NM_001002020.3	217	-56.9	2	26	3465	3491	24	0.9167	1	||||||||||	||||||::||
1421	uagGUGGGCGGAGUCGGAGGGUUUCAu	||::| |: || |||||||||||	tagCATTC-CTGCA-CCTCCCAAAGTa	>hsa_piR_022437|gb|DQ600690|Homo	NM_001002814.3	172	-32.23	2	25	6800	6824	23	0.7391	0.8696	||||||||||	:| |: || |
1422	uaGGUGGGCGGAGUCGGAGGGUUUCAu	|| ||| ||||:||||||||||||	atCCTCCCACCTCGGCCTCCCAAAGTg	>hsa_piR_022437|gb|DQ600690|Homo	NM_001002877.2	205	-50.95	2	26	4272	4298	24	0.875	0.9167	||||||||||	|| ||||:||
1423	uaGGUGGGCGGAGUCGGAGGGUUUCAu	||||||||||||||||||||||||	atCCACCCGCCTCAGCCTCCCAAAGTg	>hsa_piR_022437|gb|DQ600690|Homo	NM_001003652.4	225	-61.83	2	26	32107	32133	24	1	1	||||||||||	||||||||||
1424	uaGGUGGGCGGAGUCGGAGGGUUUCAu	|::|||||||::||||||||||||	atCTGCCCGCCTTGGCCTCCCAAAGTg	>hsa_piR_022437|gb|DQ600690|Homo	NM_001003652.4	209	-51.74	2	26	23770	23796	24	0.8333	1	||||||||||	||||||::||
1425	uaGGUGGGCGGAGUCGGAGGGUUUCAu	:::||:|||||:||||||||||||	atTTGCCTGCCTCGGCCTCCCAAAGTg	>hsa_piR_022437|gb|DQ600690|Homo	NM_001003652.4	205	-50.69	2	26	13002	13028	24	0.7917	1	||||||||||	|:|||||:||
1426	uaGGUGGGCGGAGUCGGAGGGUUUCAu	||:||||||||:||||||||||||	atCCGCCCGCCTCGGCCTCCCAAAGTg	>hsa_piR_022437|gb|DQ600690|Homo	NM_001003789.3	217	-60.71	2	26	1626	1652	24	0.9167	1	||||||||||	|||||||:||
1427	uaGGUGGGCGGAGUCGGAGGGUUUCAu	|||||||||||:||||||||||||	atCCACCCGCCTCGGCCTCCCAAAGTg	>hsa_piR_022437|gb|DQ600690|Homo	NM_001003803.3	221	-61.18	2	26	3324	3350	24	0.9583	1	||||||||||	|||||||:||
1428	uaGGUGGGCGGAGUCGGAGGGUUUCAu	|||||||||||:||||||||||||	atCCACCCGCCTCGGCCTCCCAAAGTg	>hsa_piR_022437|gb|DQ600690|Homo	NM_001003805.3	221	-61.18	2	26	3152	3178	24	0.9583	1	||||||||||	|||||||:||
1429	uaGGUGGGCGGAGUCGGAGGGUUUCAu	|||||||||||:|:||||||||||	atCCACCCGCCTCGGTCTCCCAAAGTg	>hsa_piR_022437|gb|DQ600690|Homo	NM_001003818.3	217	-58.89	2	26	2162	2188	24	0.9167	1	||||||||||	|||||||:|:
1430	uagguGGGCGGAGUCGGAGGGUUUCAu	|||||||||||||||||||||	#NAME?	>hsa_piR_022437|gb|DQ600690|Homo	NM_001003827.1	210	-50.41	2	23	1	22	21	1	1	||||||||||	||||||||||
1431	uaGGUGGGCGGAGUCGGAGGGUUUCAu	|::||| |||||||||||||||||	atCTGCCCACCTCAGCCTCCCAAAGTg	>hsa_piR_022437|gb|DQ600690|Homo	NM_001004301.4	209	-50.83	2	26	5359	5385	24	0.875	0.9583	||||||||||	|| |||||||
1432	uaGGUGGGCGGAGUCGGAGGGUUUCAu	|:::|| |||::||||||||||||	atCTGTCCACCTTGGCCTCCCAAAGTg	>hsa_piR_022437|gb|DQ600690|Homo	NM_001004313.3	197	-44.27	2	26	1412	1438	24	0.75	0.9583	||||||||||	|| |||::||
1433	uaGGUGGGCGGAGUCGGAGGGUUUCAu	|||||||:|||:||||||||||||	atCCACCCGTCTCGGCCTCCCAAAGTg	>hsa_piR_022437|gb|DQ600690|Homo	NM_001004339.3	217	-58.89	2	26	3497	3523	24	0.9167	1	||||||||||	|||:|||:||
1434	uaGGUGGGCGGAGUCGGAGGGUUUCAu	|||||| ||||:||||||||||||	atCCACCCACCTCGGCCTCCCAAAGTg	>hsa_piR_022437|gb|DQ600690|Homo	NM_001004343.3	213	-55.34	2	26	1000	1026	24	0.9167	0.9583	||||||||||	|| ||||:||
1435	uagGUGGGCGGAGUCGGAGGGUUUCAu	| :|:|||| : |||||||||||	ctgCCTCTGCCTGGACCTCCCAAAGTg	>hsa_piR_022437|gb|DQ600690|Homo	NM_001005502.2	184	-39.39	2	25	6428	6454	23	0.7391	0.8696	||||||||||	|:|||| : |
1436	uaGGUGGGCGGAGUCGGAGGGUUUCAu	|| ||:||||||||||||||||||	atCCTCCTGCCTCAGCCTCCCAAAGTg	>hsa_piR_022437|gb|DQ600690|Homo	NM_001005735.2	213	-54.64	2	26	432	458	24	0.9167	0.9583	||||||||||	|:||||||||
1437	uaGGUGGGCGGAGUCGGAGGGUUUCAu	||||||||||||||||||||||||	atCCACCCGCCTCAGCCTCCCAAAGTg	>hsa_piR_022437|gb|DQ600690|Homo	NM_001005849.2	225	-61.83	2	26	1584	1610	24	1	1	||||||||||	||||||||||
1438	uaGGUGGGCGGAGUCGGAGGGUUUCAu	|::||:||||::||||||||||||	atCTGCCTGCCTTGGCCTCCCAAAGTg	>hsa_piR_022437|gb|DQ600690|Homo	NM_001005849.2	205	-48.94	2	26	2426	2452	24	0.7917	1	||||||||||	|:||||::||
1439	uaGGUGGGCGGAGUCGGAGGGUUUCAu	:| |::|:||::||||||||||||	agTCCCTTGTCTTGGCCTCCCAAAGTg	>hsa_piR_022437|gb|DQ600690|Homo	NM_001005849.2	193	-44.79	2	26	2560	2586	24	0.7083	0.9583	||||||||||	::|:||::||
1440	uaGGUGGGCGGAGUCGGAGGGUUUCAu	|||||||||||:||||||||||||	atCCACCCGCCTCGGCCTCCCAAAGTg	>hsa_piR_022437|gb|DQ600690|Homo	NM_001005850.3	221	-61.18	2	26	2490	2516	24	0.9583	1	||||||||||	|||||||:||
1441	uaGGUGGGCGGAGUCGGAGGGUUUCAu	||||||||||::||||||||||||	atCCACCCGCCTTGGCCTCCCAAAGTg	>hsa_piR_022437|gb|DQ600690|Homo	NM_001005851.3	217	-56.9	2	26	4450	4476	24	0.9167	1	||||||||||	||||||::||
1442	uaGGUGGGCGGAGUCGGAGGGUUUCAu	|::||||||||:||||||||||||	atCTGCCCGCCTCGGCCTCCCAAAGTg	>hsa_piR_022437|gb|DQ600690|Homo	NM_001006624.2	213	-56.02	2	26	2301	2327	24	0.875	1	||||||||||	|||||||:||
1443	uaGGUGGGCGGAGUCGGAGGGUUUCAu	|::||||||||:||||||||||||	atCTGCCCGCCTCGGCCTCCCAAAGTg	>hsa_piR_022437|gb|DQ600690|Homo	NM_001006625.2	213	-56.02	2	26	2295	2321	24	0.875	1	||||||||||	|||||||:||
1444	uaGGUGGGCGGAGUCGGAGGGUUUCAu	|::|| |||||:||||||||||||	acCTGCCGGCCTCGGCCTCCCAAAGTa	>hsa_piR_022437|gb|DQ600690|Homo	NM_001006638.3	205	-50.85	2	26	1741	1767	24	0.8333	0.9583	||||||||||	| |||||:||
1445	uaGGUGGGCGGAGUCGGAGGGUUUCAu	|||||:||||::||||||||||||	agCCACCTGCCTTGGCCTCCCAAAGTg	>hsa_piR_022437|gb|DQ600690|Homo	NM_001007024.2	213	-52.96	2	26	1514	1540	24	0.875	1	||||||||||	|:||||::||
1446	uaGGUGGGCGGAGUCGGAGGGUUUCAu	|||||:||||::||||||||||||	agCCACCTGCCTTGGCCTCCCAAAGTg	>hsa_piR_022437|gb|DQ600690|Homo	NM_001007025.2	213	-52.96	2	26	1492	1518	24	0.875	1	||||||||||	|:||||::||
1447	uagguGGGCGGAGUCGGAGGGUUUCAu	||:||:|||||||||||||||	gcaatCCTGCTTCAGCCTCCCAAAGTa	>hsa_piR_022437|gb|DQ600690|Homo	NM_001007073.1	202	-46.72	2	23	1495	1521	21	0.9048	1	||||||||||	|:||:|||||
1448	uagguGGGCGGAGUCGGAGGGUUUCAu	||:||:|||||||||||||||	gcaatCCTGCTTCAGCCTCCCAAAGTa	>hsa_piR_022437|gb|DQ600690|Homo	NM_001007074.1	202	-46.72	2	23	1515	1541	21	0.9048	1	||||||||||	|:||:|||||
1449	uaGGUGGGCGGAGUCGGAGGGUUUCAu	||:||:|||||:||||||||||||	atCCGCCTGCCTCGGCCTCCCAAAGTg	>hsa_piR_022437|gb|DQ600690|Homo	NM_001007278.3	213	-57.91	2	26	2229	2255	24	0.875	1	||||||||||	|:|||||:||
1450	uaGGUGGGCGGAGUCGGAGGGUUUCAu	||:||||||||:||||||||||||	atCCGCCCGCCTCGGCCTCCCAAAGTg	>hsa_piR_022437|gb|DQ600690|Homo	NM_001007466.3	217	-60.71	2	26	6118	6144	24	0.9167	1	||||||||||	|||||||:||
1451	uaGGUGGGCGGAGUCGGAGGGUUUCAu	|::||:|:||||||||||||||||	atCTGCCTGTCTCAGCCTCCCAAAGTg	>hsa_piR_022437|gb|DQ600690|Homo	NM_001007538.2	209	-51.58	2	26	2581	2607	24	0.8333	1	||||||||||	|:|:||||||
1452	uaGGUGGGCGGAGUCGGAGGGUUUCAu	||||||||||::||||||||||||	ggCCACCCGCCTTGGCCTCCCAAAGTg	>hsa_piR_022437|gb|DQ600690|Homo	NM_001007561.2	217	-55.76	2	26	5553	5579	24	0.9167	1	||||||||||	||||||::||
1453	uaGGUGGGCGGAGUCGGAGGGUUUCAu	||||| ||||||||||||||||||	atCCACCGGCCTCAGCCTCCCAAAGTg	>hsa_piR_022437|gb|DQ600690|Homo	NM_001007561.2	217	-56.71	2	26	5844	5870	24	0.9583	0.9583	||||||||||	| ||||||||
1454	uaGGUGGGCGGAGUCGGAGGGUUUCAu	|||||| ||||:||||||||||||	atCCACCCACCTCGGCCTCCCAAAGTg	>hsa_piR_022437|gb|DQ600690|Homo	NM_001007561.2	213	-55.34	2	26	6370	6396	24	0.9167	0.9583	||||||||||	|| ||||:||
1455	uaGGUGGGCGGAGUCGGAGGGUUUCAu	||||||| ||||| ||||||||||	atCCACCCGACTCAGACTCCCAAAGTg	>hsa_piR_022437|gb|DQ600690|Homo	NM_001007561.2	209	-48.85	2	26	4016	4042	24	0.9167	0.9167	||||||||||	||| |||||
1456	uaGGUGGGCGGAGUCGGAGGGUUUCAu	|::||| |||||||||||||||||	atCTGCCCACCTCAGCCTCCCAAAGTg	>hsa_piR_022437|gb|DQ600690|Homo	NM_001007561.2	209	-50.83	2	26	5980	6006	24	0.875	0.9583	||||||||||	|| |||||||
1457	uaGGUGGGCGGAGUCGGAGGGUUUCAu	||:||| ||||:||||||||||||	atCCGCCCACCTCGGCCTCCCAAAGTg	>hsa_piR_022437|gb|DQ600690|Homo	NM_001007561.2	209	-54.87	2	26	6946	6972	24	0.875	0.9583	||||||||||	|| ||||:||
1458	uaGGUGGGCGGAGUCGGAGGGUUUCAu	| ||||||: |:||||||||||||	atCGACCCGCTCCGGCCTCCCAAAGTg	>hsa_piR_022437|gb|DQ600690|Homo	NM_001007561.2	201	-49.56	2	26	2428	2454	24	0.8333	0.9167	||||||||||	||||: |:||
1459	uaGGUGGGCGGAGUCGGAGGGUUUCAu	|| ||:||||::||||||||||||	atCCTCCTGCCTTGGCCTCCCAAAGTg	>hsa_piR_022437|gb|DQ600690|Homo	NM_001007563.3	205	-49.71	2	26	1902	1928	24	0.8333	0.9583	||||||||||	|:||||::||
1460	uaGGUGGGCGGAGUCGGAGGGUUUCAu	|::|||||||||||||||||||||	atCTGCCCGCCTCAGCCTCCCAAAGTg	>hsa_piR_022437|gb|DQ600690|Homo	NM_001008274.4	217	-56.67	2	26	5688	5714	24	0.9167	1	||||||||||	||||||||||
1461	uaGGUGGGCGGAGUCGGAGGGUUUCAu	||:||||||||:||||||||||||	atCCGCCCGCCTCGGCCTCCCAAAGTg	>hsa_piR_022437|gb|DQ600690|Homo	NM_001008274.4	217	-60.71	2	26	8128	8154	24	0.9167	1	||||||||||	|||||||:||
1462	uaGGUGGGCGGAGUCGGAGGGUUUCAu	|||||| ::|::||||||||||||	atCCACCCATTTTGGCCTCCCAAAGTg	>hsa_piR_022437|gb|DQ600690|Homo	NM_001008274.4	201	-47.24	2	26	4423	4449	24	0.7917	0.9583	||||||||||	|| ::|::||
1463	uaGGUGGGCGGAGUCGGAGGGUUUCAu	:| ||| |||:||||||||||||	gaTCCCCCAACTCGGCCTCCCAAAGTa	>hsa_piR_022437|gb|DQ600690|Homo	NM_001008274.4	193	-48.63	2	26	5054	5080	24	0.7917	0.875	||||||||||	|| |||:||
1464	uaGGUGGGCGGAGUCG-GAGGGUUUCAu	|: ||:|||||||| ||||||||||	tcCTCCCTGCCTCAGCACTCCCAAAGTg	>hsa_piR_022437|gb|DQ600690|Homo	NM_001008388.5	200	-48.7	2	26	5369	5396	25	0.84	0.92	||||||||||	:||||||||
1465	uaGGUGGGCGGAGUCGGAGGGUUUCAu	|||||| |||::||||||||||||	atCCACCCACCTTGGCCTCCCAAAGTg	>hsa_piR_022437|gb|DQ600690|Homo	NM_001008493.3	209	-51.06	2	26	10257	10283	24	0.875	0.9583	||||||||||	|| |||::||
1466	uaGGUGGGCGGAGUCGGAGGGUUUCAu	|||||:|||||:||||||||||||	atCCACCTGCCTCGGCCTCCCAAAGTg	>hsa_piR_022437|gb|DQ600690|Homo	NM_001008528.3	217	-58.38	2	26	1681	1707	24	0.9167	1	||||||||||	|:|||||:||
1467	uaGGUGGGCGGAGUCGGAGGGUUUCAu	||:||| |||::||||||||||||	atCCGCCCACCTTGGCCTCCCAAAGTg	>hsa_piR_022437|gb|DQ600690|Homo	NM_001008528.3	205	-50.59	2	26	1151	1177	24	0.8333	0.9583	||||||||||	|| |||::||
1468	uaGGUGGGCGGAGUCGGAGGGUUUCAu	||||||||||::||||||||||||	atCCACCCGCCTTGGCCTCCCAAAGTg	>hsa_piR_022437|gb|DQ600690|Homo	NM_001008727.5	217	-56.9	2	26	1868	1894	24	0.9167	1	||||||||||	||||||::||
1469	uaGGUGGGCGGAGUCGGAGGGUUUCAu	|| ||:||||||||||||||||||	gtCCTCCTGCCTCAGCCTCCCAAAGTg	>hsa_piR_022437|gb|DQ600690|Homo	NM_001008727.5	213	-54.33	2	26	5651	5677	24	0.9167	0.9583	||||||||||	|:||||||||
1470	uaGGUGGGCGGAGUCGGAGGGUUUCAu	|||||:|||||: |||||||||||	atCCACCTGCCTCGACCTCCCAAAGTa	>hsa_piR_022437|gb|DQ600690|Homo	NM_001008738.3	209	-53.18	2	26	5550	5576	24	0.875	0.9583	||||||||||	|:|||||: |
1471	uaGGUGGGCGGAGUCGGAGGGUUUCAu	:| ||| |||||||||||||||||	ttTCTCCCACCTCAGCCTCCCAAAGTg	>hsa_piR_022437|gb|DQ600690|Homo	NM_001008749.3	205	-47.59	2	26	2516	2542	24	0.875	0.9167	||||||||||	|| |||||||
1472	uaGGUGGGCGGAG--UCGGAGGGUUUCAu	|||||:|:||| :||||||||||||	atCCACCTGTCTCGTGGCCTCCCAAAGTg	>hsa_piR_022437|gb|DQ600690|Homo	NM_001008749.3	200	-51.21	2	26	2376	2404	26	0.8077	0.9231	||||||||||	|:||| :||
1473	uaGGUGGGCGGAGUCGGAGGGUUUCAu	|||||:||| ::||||||||||||	atCCACCTGCCGTGGCCTCCCAAAGTg	>hsa_piR_022437|gb|DQ600690|Homo	NM_001008781.3	205	-50.86	2	26	15585	15611	24	0.8333	0.9583	||||||||||	|:||| ::||
1474	uaGGUGGGCGGAGUCGGAGGGUUUCAu	||||||| ||| |||||||||||	atCCACCCGACTCCACCTCCCAAAGTg	>hsa_piR_022437|gb|DQ600690|Homo	NM_001008801.2	201	-47.58	2	26	3384	3410	24	0.875	0.875	||||||||||	||| ||| |
1475	uaGGUGGGCGGAGUCGGAGGGUUUCAu	|::|||||||::||||||||||||	atCTGCCCGCCTTGGCCTCCCAAAGTg	>hsa_piR_022437|gb|DQ600690|Homo	NM_001008895.4	209	-51.74	2	26	4339	4365	24	0.8333	1	||||||||||	||||||::||
1476	uaGGUGGGCGGAGUCGGAGGGUUUCAu	||:||||||||:||||||||||||	atCCGCCCGCCTCGGCCTCCCAAAGTg	>hsa_piR_022437|gb|DQ600690|Homo	NM_001009608.3	217	-60.71	2	26	4298	4324	24	0.9167	1	||||||||||	|||||||:||
1477	uaGGUGGGCGGAGUCGGAGGGUUUCAu	|||||:|||||:||||||||||||	atCCACCTGCCTCGGCCTCCCAAAGTg	>hsa_piR_022437|gb|DQ600690|Homo	NM_001009899.4	217	-58.38	2	26	8707	8733	24	0.9167	1	||||||||||	|:|||||:||
1478	uaGGUGGGCGGAGUCGGAGGGUUUCAu	|||||| ||||:||||||||||||	atCCACCCACCTCGGCCTCCCAAAGTa	>hsa_piR_022437|gb|DQ600690|Homo	NM_001009899.4	213	-55.44	2	26	9355	9381	24	0.9167	0.9583	||||||||||	|| ||||:||
1479	uaGGUGGGCGGAGUCGGAGGGUUUCAu	|| ||| ||| : |||||||||||	atCCTCCCACCT-GTCCTCCCAAAGTg	>hsa_piR_022437|gb|DQ600690|Homo	NM_001009960.1	183	-39.13	2	26	2594	2619	24	0.7917	0.8333	||||||||||	|| ||| : |
1480	uaGGUGGGCGGAGUCGGAGGGUUUCAu	||||||||:||:||||||||||||	atCCACCCGCTTCGGCCTCCCAAAGTg	>hsa_piR_022437|gb|DQ600690|Homo	NM_001010851.3	217	-58.24	2	26	5660	5686	24	0.9167	1	||||||||||	||||:||:||
1481	uaGGUGGGCGGAGUCGGAGGGUUUCAu	|::||| ||||:||||||||||||	atCTGCCCACCTCGGCCTCCCAAAGTg	>hsa_piR_022437|gb|DQ600690|Homo	NM_001010851.3	205	-50.18	2	26	4100	4126	24	0.8333	0.9583	||||||||||	|| ||||:||
1482	uaGGUGGGCGGAGUCGGAGGGUUUCAu	|| ||:|:||::||||||||||||	atCCTCCTGTCTTGGCCTCCCAAAGTg	>hsa_piR_022437|gb|DQ600690|Homo	NM_001010853.3	201	-47.42	2	26	2559	2585	24	0.7917	0.9583	||||||||||	|:|:||::||
1483	uaGGUGGGCGGAGUCGGAGGGUUUCAu	||||||||||||||||||||||||	atCCACCCGCCTCAGCCTCCCAAAGTg	>hsa_piR_022437|gb|DQ600690|Homo	NM_001010854.2	225	-61.83	2	26	16069	16095	24	1	1	||||||||||	||||||||||
1484	uaGGUGGGCGGAGUCGGAGGGUUUCAu	|::|||||||||||||||||||||	atCTGCCCGCCTCAGCCTCCCAAAGTg	>hsa_piR_022437|gb|DQ600690|Homo	NM_001010854.2	217	-56.67	2	26	12686	12712	24	0.9167	1	||||||||||	||||||||||
1485	uaGGUGGGCGGAGUCGGAGGGUUUCAu	||:||| ||||:||||||||||||	atCCGCCCACCTCGGCCTCCCAAAGTg	>hsa_piR_022437|gb|DQ600690|Homo	NM_001010854.2	209	-54.87	2	26	13988	14014	24	0.875	0.9583	||||||||||	|| ||||:||
1486	uaGGUGGGCGGAGUCGGAGGGUUUCAu	|| ||| |||::||||||||||||	agCCTCCCACCTTGGCCTCCCAAAGTg	>hsa_piR_022437|gb|DQ600690|Homo	NM_001010883.3	201	-45.53	2	26	4445	4471	24	0.8333	0.9167	||||||||||	|| |||::||
1487	uaGGUGGGCGGAGUCGGAGGGUUUCAu	:||||:|||||:||||||||||||	atTCACCTGCCTCGGCCTCCCAAAGTg	>hsa_piR_022437|gb|DQ600690|Homo	NM_001010891.5	213	-55.55	2	26	3609	3635	24	0.875	1	||||||||||	|:|||||:||
1488	uaGGUGGGCGGAGUCGGAGGGUUUCAu	|||||| :||| ||||||||||||	atCCACCCATCTCTGCCTCCCAAAGTg	>hsa_piR_022437|gb|DQ600690|Homo	NM_001010906.2	205	-49.64	2	26	3065	3091	24	0.875	0.9167	||||||||||	|| :||| ||
1489	uaGGUGGGCGGAGUCGGAGGGUUUCAu	:|:|||||||::||||||||||||	atTCGCCCGCCTTGGCCTCCCAAAGTg	>hsa_piR_022437|gb|DQ600690|Homo	NM_001010922.3	209	-53.6	2	26	1416	1442	24	0.8333	1	||||||||||	||||||::||
1490	uagGUGGGCGGAGUCGGAGGGUUUCAu	| ||| |||||||||||||||||	ccgCCCCCCCCTCAGCCTCCCAAAGTg	>hsa_piR_022437|gb|DQ600690|Homo	NM_001010935.2	204	-49.68	2	25	3744	3770	23	0.913	0.913	||||||||||	|| |||||||
1491	uaGGUGGGCGGAGUCGGAGGGUUUCAu	|::|||||||||||||||||||||	atCTGCCCGCCTCAGCCTCCCAAAGTa	>hsa_piR_022437|gb|DQ600690|Homo	NM_001010942.3	217	-56.77	2	26	11652	11678	24	0.9167	1	||||||||||	||||||||||
1492	uaGGUGGGCGGAGUCGGAGGGUUUCAu	|||:|:||:|||||||||||||||	atCCATCTGCTTCAGCCTCCCAAAGTg	>hsa_piR_022437|gb|DQ600690|Homo	NM_001010942.3	213	-53.74	2	26	7567	7593	24	0.875	1	||||||||||	|:||:|||||
1493	uaGGUGGGCGGAGUCGGAGGGUUUCAu	||:||:|| |||||||||||||||	atCCGCCTGCGTCAGCCTCCCAAAGTg	>hsa_piR_022437|gb|DQ600690|Homo	NM_001010942.3	209	-53.39	2	26	4779	4805	24	0.875	0.9583	||||||||||	|:|| |||||
1494	uagguGGGCGGAGUCGGAGGGUUUCAu	| | |||::||||||||||||	agtgtCACACCTTGGCCTCCCAAAGTg	>hsa_piR_022437|gb|DQ600690|Homo	NM_001010942.3	186	-38.62	2	23	10906	10932	21	0.8095	0.9048	||||||||||	| |||::||
1495	uaGGUGGGCGGAGUCGGAGGGUUUCAu	|| :|:||:|::||||||||||||	atCCTTCTGCTTTGGCCTCCCAAAGTg	>hsa_piR_022437|gb|DQ600690|Homo	NM_001010980.5	197	-44.24	2	26	1892	1918	24	0.75	0.9583	||||||||||	|:||:|::||
1496	uaGGUGGGCGGAGUCGGAGGGUUUCAu	:|:|||||||::||||||||||||	atTCGCCCGCCTTGGCCTCCCAAAGTg	>hsa_piR_022437|gb|DQ600690|Homo	NM_001010982.4	209	-53.6	2	26	1550	1576	24	0.8333	1	||||||||||	||||||::||
1497	uaGGUGGGCGGAGUCGGAGGGUUUCAu	|::||||||||:||||||||||||	atCTGCCCGCCTCGGCCTCCCAAAGTg	>hsa_piR_022437|gb|DQ600690|Homo	NM_001010989.3	213	-56.02	2	26	2693	2719	24	0.875	1	||||||||||	|||||||:||
1498	uaGGUGGGCGGAGUCGGAGGGUUUCAu	||:||| |||||||||||||||||	atCCGCCCACCTCAGCCTCCCAAAGTg	>hsa_piR_022437|gb|DQ600690|Homo	NM_001011537.2	213	-55.52	2	26	156	182	24	0.9167	0.9583	||||||||||	|| |||||||
1499	uaGGUGGGCGGAGUCGGAGGGUUUCAu	|::|||||||||||||||||||||	atCTGCCCGCCTCAGCCTCCCAAAGTg	>hsa_piR_022437|gb|DQ600690|Homo	NM_001011543.2	217	-56.67	2	26	2344	2370	24	0.9167	1	||||||||||	||||||||||
1500	uagGUGGGCGGAGUCGGAGGGUUUCAu	:|::: :: ||||||||||||||	ttgTATTTTTTGCAGCCTCCCAAAGTt	>hsa_piR_022437|gb|DQ600690|Homo	NM_001011553.3	180	-30.72	2	25	2932	2958	23	0.6522	0.913	||||||||||	:: :: ||||
1501	uaGGUGGGCGGAGUCGGAGGGUUUCAu	||||||||||||||||||||||||	atCCACCCGCCTCAGCCTCCCAAAGTg	>hsa_piR_022437|gb|DQ600690|Homo	NM_001011658.4	225	-61.83	2	26	1859	1885	24	1	1	||||||||||	||||||||||
1502	uaGGUGGGCGGAGUCGGAGGGUUUCAu	|::|||||||::||||||||||||	atCTGCCCGCCTTGGCCTCCCAAAGTa	>hsa_piR_022437|gb|DQ600690|Homo	NM_001011658.4	209	-51.84	2	26	1163	1189	24	0.8333	1	||||||||||	||||||::||
1503	uaGGUGGGCGGAGUCGGAGGGUUUCAu	:| ||:||||||||||||||||||	atTCTCCTGCCTCAGCCTCCCAAAGTg	>hsa_piR_022437|gb|DQ600690|Homo	NM_001011658.4	209	-51.81	2	26	2066	2092	24	0.875	0.9583	||||||||||	|:||||||||
1504	uaGGU-GGGCGGAGUCGGAGGGUUUCAu	|:| ||: |:|| |||||||||||	aaCTATCCTACTTCTTCCTCCCAAAGTg	>hsa_piR_022437|gb|DQ600690|Homo	NM_001011666.3	180	-36.94	2	26	2685	2712	25	0.72	0.84	||||||||||	|: |:|| |
1505	uaGGUGGGCGGAGUCGGAGGGUUUCAu	|::||||||||:||||||||||||	atCTGCCCGCCTCGGCCTCCCAAAGTg	>hsa_piR_022437|gb|DQ600690|Homo	NM_001011713.3	213	-56.02	2	26	5427	5453	24	0.875	1	||||||||||	|||||||:||
1506	uaGGUGGGCGGAGUCGGAGGGUUUCAu	|::||| ||||:||||||||||||	atCTGCCCACCTCGGCCTCCCAAAGTg	>hsa_piR_022437|gb|DQ600690|Homo	NM_001012409.3	205	-50.18	2	26	2293	2319	24	0.8333	0.9583	||||||||||	|| ||||:||
1507	uaGGUGGGCGGAGUCGGAGGGUUUCAu	|::||| ||||:||||||||||||	atCTGCCCACCTCGGCCTCCCAAAGTg	>hsa_piR_022437|gb|DQ600690|Homo	NM_001012411.3	205	-50.18	2	26	1537	1563	24	0.8333	0.9583	||||||||||	|| ||||:||
1508	uaGGUGGGCGGAGUCGGAGGGUUUCAu	|::||| ||||:||||||||||||	atCTGCCCACCTCGGCCTCCCAAAGTg	>hsa_piR_022437|gb|DQ600690|Homo	NM_001012413.3	205	-50.18	2	26	1486	1512	24	0.8333	0.9583	||||||||||	|| ||||:||
1509	uaGGUGGGCGGAGUCGGAGGGUUUCAu	|: ||:||||:: |||||||||||	atCTTCCTGCCTTGACCTCCCAAAGTg	>hsa_piR_022437|gb|DQ600690|Homo	NM_001012414.3	193	-42.46	2	26	1291	1317	24	0.75	0.9167	||||||||||	|:||||:: |
1510	uaGGUGGGCGGAGUCGGAGGGUUUCAu	||:|| ||||||||||||||||||	atCCGCCAGCCTCAGCCTCCCAAAGTg	>hsa_piR_022437|gb|DQ600690|Homo	NM_001012426.1	213	-53.8	2	26	5280	5306	24	0.9167	0.9583	||||||||||	| ||||||||
1511	uaGGUGGGCGGAGUCGGAGGGUUUCAu	||:|| ||||||||||||||||||	atCCGCCAGCCTCAGCCTCCCAAAGTg	>hsa_piR_022437|gb|DQ600690|Homo	NM_001012427.2	213	-53.8	2	26	5319	5345	24	0.9167	0.9583	||||||||||	| ||||||||
1512	uaGGUGGGCGGAGUCGGAGGGUUUCAu	|||||| ||||:||||||||||||	atCCACCCTCCTCGGCCTCCCAAAGTg	>hsa_piR_022437|gb|DQ600690|Homo	NM_001012454.6	213	-54.95	2	26	3017	3043	24	0.9167	0.9583	||||||||||	|| ||||:||
1513	uaGGUGGGCGGAGUCGGAGGGUUUCAu	:| ||:|||||||:||||||||||	atTCTCCTGCCTCAGTCTCCCAAAGTg	>hsa_piR_022437|gb|DQ600690|Homo	NM_001012515.4	205	-49.52	2	26	4055	4081	24	0.8333	0.9583	||||||||||	|:|||||||:
1514	uaGGUGGGCGGAGUCGGAGGGUUUCAu	|||||:||| ||||||||||||||	atCCACCTGCCACAGCCTCCCAAAGTg	>hsa_piR_022437|gb|DQ600690|Homo	NM_001012659.2	213	-53.74	2	26	1852	1878	24	0.9167	0.9583	||||||||||	|:||| ||||
1515	uaGGUGGGCGGAGUCGGAGGGUUUCAu	||:||:||||:: |||||||||||	atCCGCCTGCCTTGACCTCCCAAAGTg	>hsa_piR_022437|gb|DQ600690|Homo	NM_001012659.2	201	-49.61	2	26	1716	1742	24	0.7917	0.9583	||||||||||	|:||||:: |
1516	uaGGUGGGCGGAGUCGGAGGGUUUCAu	|||||| ||||:|:||||||||||	atCCACCCACCTCGGTCTCCCAAAGTg	>hsa_piR_022437|gb|DQ600690|Homo	NM_001012755.5	209	-53.05	2	26	2508	2534	24	0.875	0.9583	||||||||||	|| ||||:|:
1517	uaGGUGGGCGGAGUCGGAGGGUUUCAu	|||||:||:||:||||||||||||	atCCACCTGCTTCGGCCTCCCAAAGTg	>hsa_piR_022437|gb|DQ600690|Homo	NM_001012756.3	213	-55.44	2	26	4656	4682	24	0.875	1	||||||||||	|:||:||:||
1518	uaGGUGGGCGGAGUCGGAGGGUUUCAu	|||||: |||||||||||||||||	atCCACCTACCTCAGCCTCCCAAAGTg	>hsa_piR_022437|gb|DQ600690|Homo	NM_001012991.3	213	-53.04	2	26	5588	5614	24	0.9167	0.9583	||||||||||	|: |||||||
1519	uaGGUGGGCGGAGUCGGAGGGUUUCAu	|| |||||||||||||||||||||	atCCTCCCGCCTCAGCCTCCCAAAGTg	>hsa_piR_022437|gb|DQ600690|Homo	NM_001013615.3	217	-57.44	2	26	1273	1299	24	0.9583	0.9583	||||||||||	||||||||||
1520	uaGGUGGGCGGAGUCGGAGGGUUUCAu	|||||||||||: :||||||||||	atCCACCCGCCTCGATCTCCCAAAGTg	>hsa_piR_022437|gb|DQ600690|Homo	NM_001013619.4	209	-54.79	2	26	2042	2068	24	0.875	0.9583	||||||||||	|||||||: :
1521	uaGGUGGGCGGAGUCGGAGGGUUUCAu	|||||:||||| ||||||||||||	atCCACCTGCCTC-GCCTCCCAAAGTg	>hsa_piR_022437|gb|DQ600690|Homo	NM_001013620.4	207	-53.95	2	26	4602	4627	24	0.9167	0.9583	||||||||||	|:||||| ||
1522	uaGGUGGGCGGAGUCGGAGGGUUUCAu	|| ||| |||::||||||||||||	atCCTCCCACCTTGGCCTCCCAAAGTg	>hsa_piR_022437|gb|DQ600690|Homo	NM_001013620.4	201	-46.67	2	26	7528	7554	24	0.8333	0.9167	||||||||||	|| |||::||
1523	uaGGUGGGCGGAGUCGGAGGGUUUCAu	||:||||||||:||||||||||||	atCCGCCCGCCTCGGCCTCCCAAAGTg	>hsa_piR_022437|gb|DQ600690|Homo	NM_001013657.3	217	-60.71	2	26	2003	2029	24	0.9167	1	||||||||||	|||||||:||
1524	uaGGUGGGCGGAGUCGGAGGGUUUCAu	|| ||| |||||||||||||||||	atCCTCCCACCTCAGCCTCCCAAAGTg	>hsa_piR_022437|gb|DQ600690|Homo	NM_001013657.3	209	-51.6	2	26	3196	3222	24	0.9167	0.9167	||||||||||	|| |||||||
1525	uaGGUGGGCGGAGUCGGAGGGUUUCAu	|| ||| ||||:||||||||||||	gtCCTCCCACCTCGGCCTCCCAAAGTa	>hsa_piR_022437|gb|DQ600690|Homo	NM_001013657.3	205	-50.74	2	26	1681	1707	24	0.875	0.9167	||||||||||	|| ||||:||
1526	uaGGUGGGCGGAGUCGGAGGGUUUCAu	|::|||||||:: |||||||||||	atCTGCCCGCCTTGTCCTCCCAAAGTg	>hsa_piR_022437|gb|DQ600690|Homo	NM_001013659.3	201	-47	2	26	1938	1964	24	0.7917	0.9583	||||||||||	||||||:: |
1527	uaGGUGGGC-GGAGUCGGAGGGUUUCAu	|| |||| |||::||||||||||||	aaCCCCCCGCCCTTGGCCTCCCAAAGTg	>hsa_piR_022437|gb|DQ600690|Homo	NM_001013659.3	200	-46.9	2	26	2329	2356	25	0.84	0.92	||||||||||	|| |||::||
1528	uaGGUGGGCGGAGUCGGAGGGUUUCAu	||||||||||||||||||||||||	atCCACCCGCCTCAGCCTCCCAAAGTg	>hsa_piR_022437|gb|DQ600690|Homo	NM_001013660.3	225	-61.83	2	26	4709	4735	24	1	1	||||||||||	||||||||||
1529	uaGGUGGGCGGAGUCGGAGGGUUUCAu	|::||:|||||:||||||||||||	atCTGCCTGCCTCGGCCTCCCAAAGTg	>hsa_piR_022437|gb|DQ600690|Homo	NM_001013660.3	209	-53.22	2	26	414	440	24	0.8333	1	||||||||||	|:|||||:||
1530	uagGUGGGCGGAGUCGGAGGGUUUCAu	::|||||||| ||||||||||||	ataTGCCCGCCTCCGCCTCCCAAAGTg	>hsa_piR_022437|gb|DQ600690|Homo	NM_001013660.3	204	-46.85	2	25	114	140	23	0.8696	0.9565	||||||||||	||||||| ||
1531	uaGGUGGGCGGAGUCGGAGGGUUUCAu	|| |::||||||| ||||||||||	atCCCCTTGCCTCAGACTCCCAAAGTg	>hsa_piR_022437|gb|DQ600690|Homo	NM_001013660.3	201	-44.65	2	26	5216	5242	24	0.8333	0.9167	||||||||||	::|||||||
1532	uaGGUGGGCGGAGUCGGAGGGUUUCAu	|:|||||||||:||||||||||||	atCTACCCGCCTCGGCCTCCCAAAGTg	>hsa_piR_022437|gb|DQ600690|Homo	NM_001013694.3	217	-58.47	2	26	2627	2653	24	0.9167	1	||||||||||	|||||||:||
1533	uaGGUGGGCGGAGUCGGAGGGUUUCAu	||:||| | |::||||||||||||	atCCGCCCACATTGGCCTCCCAAAGTg	>hsa_piR_022437|gb|DQ600690|Homo	NM_001014380.3	197	-43.38	2	26	4038	4064	24	0.7917	0.9167	||||||||||	|| | |::||
1534	uaGGUGGGCGGAGUCGGAGGGUUUCAu	|::||:||||||||||||||||||	atCTGCCTGCCTCAGCCTCCCAAAGTg	>hsa_piR_022437|gb|DQ600690|Homo	NM_001014436.3	213	-53.87	2	26	3932	3958	24	0.875	1	||||||||||	|:||||||||
1535	uaGGUGGGCGGAGUCGGAGGGUUUCAu	|||||| ||||: |||||||||||	atCCACCCACCTCGACCTCCCAAAGTg	>hsa_piR_022437|gb|DQ600690|Homo	NM_001014765.1	205	-50.04	2	26	3190	3216	24	0.875	0.9167	||||||||||	|| ||||: |
1536	uaGGUGGGCGGAGUCGGAGGGUUUCAu	|||||| |||||||||||||||||	atCCACCCACCTCAGCCTCCCAAAGTg	>hsa_piR_022437|gb|DQ600690|Homo	NM_001014831.3	217	-55.99	2	26	4335	4361	24	0.9583	0.9583	||||||||||	|| |||||||
1537	uaGGUGGGCGGAGUCGGAGGGUUUCAu	|||||| |||||||||||||||||	atCCACCCACCTCAGCCTCCCAAAGTg	>hsa_piR_022437|gb|DQ600690|Homo	NM_001014832.2	217	-55.99	2	26	4036	4062	24	0.9583	0.9583	||||||||||	|| |||||||
1538	uaGGUGGGCGGAGUCGGAGGGUUUCAu	|||||| |||||||||||||||||	atCCACCCACCTCAGCCTCCCAAAGTg	>hsa_piR_022437|gb|DQ600690|Homo	NM_001014834.3	217	-55.99	2	26	3577	3603	24	0.9583	0.9583	||||||||||	|| |||||||
1539	uaGGUGGGCGGAGUCGGAGGGUUUCAu	|||||| |||||||||||||||||	atCCACCCACCTCAGCCTCCCAAAGTg	>hsa_piR_022437|gb|DQ600690|Homo	NM_001014835.2	217	-55.99	2	26	3650	3676	24	0.9583	0.9583	||||||||||	|| |||||||
1540	uaGGUGGGCGGAGUCGGAGGGUUUCAu	|::||| |||::||||||||||||	atCTGCCCACCTTGGCCTCCCAAAGTg	>hsa_piR_022437|gb|DQ600690|Homo	NM_001017369.2	201	-45.9	2	26	1376	1402	24	0.7917	0.9583	||||||||||	|| |||::||
1541	uaGGUGGGCGGAGUCGGAGGGUUUCAu	|| :|| |||| ||||||||||||	atCCTTCCACCTCTGCCTCCCAAAGTg	>hsa_piR_022437|gb|DQ600690|Homo	NM_001017371.5	197	-44.73	2	26	6351	6377	24	0.8333	0.875	||||||||||	|| |||| ||
1542	uaGGUGGGCGGAGUCGGAGGGUUUCAu	||:||||||||:||||||||||||	atCCGCCCGCCTCGGCCTCCCAAAGTg	>hsa_piR_022437|gb|DQ600690|Homo	NM_001017396.3	217	-60.71	2	26	3050	3076	24	0.9167	1	||||||||||	|||||||:||
1543	uaGGUGGGCGGAGUCGGAGGGUUUCAu	|||||| ||||:||||||||||||	atCCACCCACCTCGGCCTCCCAAAGTg	>hsa_piR_022437|gb|DQ600690|Homo	NM_001017524.2	213	-55.34	2	26	2586	2612	24	0.9167	0.9583	||||||||||	|| ||||:||
1544	uaGGUGGGCGGAGUCGGAGGGUUUCAu	|| ||| |||||||||||||||||	atCCTCCCACCTCAGCCTCCCAAAGTa	>hsa_piR_022437|gb|DQ600690|Homo	NM_001017526.1	209	-51.7	2	26	495	521	24	0.9167	0.9167	||||||||||	|| |||||||
1545	uaGGUGGGCGGAGUCGGAGGGUUUCAu	||:||||||||:||||||||||||	atCCGCCCGCCTCGGCCTCCCAAAGTg	>hsa_piR_022437|gb|DQ600690|Homo	NM_001017974.2	217	-60.71	2	26	3403	3429	24	0.9167	1	||||||||||	|||||||:||
1546	uaGGUGGGCGGAGUCGGAGGGUUUCAu	||||||||||| ||||||||||||	atCCACCCGCCTCCGCCTCCCAAAGTg	>hsa_piR_022437|gb|DQ600690|Homo	NM_001017980.3	217	-56.42	2	26	3503	3529	24	0.9583	0.9583	||||||||||	||||||| ||
1547	uaGGUGGGCGGAGUCGGAGGGUUUCAu	||:||:||||::||||||||||||	atCCGCCTGCCTTGGCCTCCCAAAGTg	>hsa_piR_022437|gb|DQ600690|Homo	NM_001018089.3	209	-53.63	2	26	4040	4066	24	0.8333	1	||||||||||	|:||||::||
1548	uaGGUGGGCGGAGUCGGAGGGUUUCAu	|::||| |||::||||||||||||	atCTGCCCACCTTGGCCTCCCAAAGTg	>hsa_piR_022437|gb|DQ600690|Homo	NM_001018111.3	201	-45.9	2	26	1033	1059	24	0.7917	0.9583	||||||||||	|| |||::||
1549	uaGGUGGGCGGAGUCGGAGGGUUUCAu	|||||:||||||||||||||||||	atCCACCTGCCTCAGCCTCCCAAAGTg	>hsa_piR_022437|gb|DQ600690|Homo	NM_001018115.3	221	-59.03	2	26	4786	4812	24	0.9583	1	||||||||||	|:||||||||
1550	uaGGUGGGCGGAGUCGGAGGGUUUCAu	|::||:||||::|:||||||||||	atCTGCCTGCCTTGGTCTCCCAAAGTg	>hsa_piR_022437|gb|DQ600690|Homo	NM_001019.5	201	-46.65	2	26	1423	1449	24	0.75	1	||||||||||	|:||||::|:
1551	uaGGUGGGCGGAGUCGGAGGGUUUCAu	:| ||:||||||||||||||||||	atTCTCCTGCCTCAGCCTCCCAAAGTg	>hsa_piR_022437|gb|DQ600690|Homo	NM_001022.4	209	-51.81	2	26	617	643	24	0.875	0.9583	||||||||||	|:||||||||
1552	uaGGUGGGCGGAGUCGGAGGGUUUCAu	|||||:||||||||||||||||||	atCCACCTGCCTCAGCCTCCCAAAGTg	>hsa_piR_022437|gb|DQ600690|Homo	NM_001023563.4	221	-59.03	2	26	5388	5414	24	0.9583	1	||||||||||	|:||||||||
1553	uaGGUGGGCGGAGUCGGAGGGUUUCAu	|::||| |||||||||||||||||	atCTGCCCACCTCAGCCTCCCAAAGTg	>hsa_piR_022437|gb|DQ600690|Homo	NM_001023563.4	209	-50.83	2	26	5683	5709	24	0.875	0.9583	||||||||||	|| |||||||
1554	uaGGUGGGCGGAGUCGGAGGGUUUCAu	|::||:||||||||||||||||||	atCTGCCTGCCTCAGCCTCCCAAAGTt	>hsa_piR_022437|gb|DQ600690|Homo	NM_001024593.2	213	-52.46	2	26	1845	1871	24	0.875	1	||||||||||	|:||||||||
1555	uaGGUGGGCGGAGUCGGAGGGUUUCAu	||:||:||||||||||||||||||	atCCGCCTGCCTCAGCCTCCCAAAGTg	>hsa_piR_022437|gb|DQ600690|Homo	NM_001024596.3	217	-58.56	2	26	4859	4885	24	0.9167	1	||||||||||	|:||||||||
1556	uaGGUGGGCGGAGUCGGAGGGUUUCAu	|::||:|||||:||||||||||||	atCTGCCTGCCTCGGCCTCCCAAAGTg	>hsa_piR_022437|gb|DQ600690|Homo	NM_001024956.2	209	-53.22	2	26	4308	4334	24	0.8333	1	||||||||||	|:|||||:||
1557	uaGGUGGGCGGAGUCGGAGGGUUUCAu	|:||||||||| |||||||||||	atCTACCCGCCTCCACCTCCCAAAGTg	>hsa_piR_022437|gb|DQ600690|Homo	NM_001025108.2	205	-51.36	2	26	6011	6037	24	0.875	0.9167	||||||||||	||||||| |
1558	uaGGUGGGCGGAGUCGGAGGGUUUCAu	|| :: |||||:||||||||||||	atCCTTTGGCCTCGGCCTCCCAAAGTg	>hsa_piR_022437|gb|DQ600690|Homo	NM_001025108.2	197	-46.93	2	26	6859	6885	24	0.7917	0.9167	||||||||||	: |||||:||
1559	uaGGUGGGCGGAGUCGGAGGGUUUCAu	||:||: |||||||||||||||||	atCCGCCTACCTCAGCCTCCCAAAGTg	>hsa_piR_022437|gb|DQ600690|Homo	NM_001025433.2	209	-52.57	2	26	1709	1735	24	0.875	0.9583	||||||||||	|: |||||||
1560	uaGGUGGGCGGAGUCGGAGGGUUUCAu	||:||: |||||||||||||||||	atCCGCCTACCTCAGCCTCCCAAAGTg	>hsa_piR_022437|gb|DQ600690|Homo	NM_001025434.2	209	-52.57	2	26	1697	1723	24	0.875	0.9583	||||||||||	|: |||||||
1561	uaggUGGGC-GGAGUCGGAGGGUUUCAu	|:|:| |||::||||||||||||	catgATCTGCCCTTGGCCTCCCAAAGTg	>hsa_piR_022437|gb|DQ600690|Homo	NM_001025780.3	190	-39.89	2	24	2572	2599	23	0.7826	0.9565	||||||||||	:| |||::||
1562	uaGGUGGGCGGAGUCGGAGGGUUUCAu	||||| ||||::||||||||||||	atCCACCAGCCTTGGCCTCCCAAAGTg	>hsa_piR_022437|gb|DQ600690|Homo	NM_001029.5	209	-49.34	2	26	1026	1052	24	0.875	0.9583	||||||||||	| ||||::||
1563	uaGGUGGGCGGAGUCGGAGGGUUUCAu	|| |: | ||||||||||||||||	atCCTCTGGACTCAGCCTCCCAAAGTg	>hsa_piR_022437|gb|DQ600690|Homo	NM_001029864.2	197	-44.66	2	26	4786	4812	24	0.8333	0.875	||||||||||	: | ||||||
1564	uaGGUGGGCGGAGUCGGAGGGUUUCAu	|| ||| :| :||:||||||||||	atCCTCCCTTCCTAGTCTCCCAAAGTg	>hsa_piR_022437|gb|DQ600690|Homo	NM_001030001.4	189	-40.2	2	26	2425	2451	24	0.75	0.875	||||||||||	|| :| :||:
1565	uaGGUGGGCGGAGUCGGAGGGUUUCAu	|::||:||||::|:||||||||||	atCTGCCTGCCTTGGTCTCCCAAAGTg	>hsa_piR_022437|gb|DQ600690|Homo	NM_001030009.2	201	-46.65	2	26	1357	1383	24	0.75	1	||||||||||	|:||||::|:
1566	uaGGUGGGCGGAGUCGGAGGGUUUCAu	|::||| ||||:||||||||||||	atCTGCCCACCTCGGCCTCCCAAAGTg	>hsa_piR_022437|gb|DQ600690|Homo	NM_001030059.3	205	-50.18	2	26	2401	2427	24	0.8333	0.9583	||||||||||	|| ||||:||
1567	uaGGUGGGCGGAGUCGGAGGGUUUCAu	|:|||:||||||||||||||||||	atCTACCTGCCTCAGCCTCCCAAAGTg	>hsa_piR_022437|gb|DQ600690|Homo	NM_001030288.3	217	-56.32	2	26	1732	1758	24	0.9167	1	||||||||||	|:||||||||
1568	uaGGUGGGCGGAGUCGGAGGGUUUCAu	||:: :|||||:||||||||||||	atCCGTATGCCTCGGCCTCCCAAAGTg	>hsa_piR_022437|gb|DQ600690|Homo	NM_001030288.3	201	-49.7	2	26	5877	5903	24	0.7917	0.9583	||||||||||	:|||||:||
1569	uaGGUGGGCGGAGUCGGAGGGUUUCAu	:|||||||||::|:||||||||||	atTCACCCGCCTTGGTCTCCCAAAGTa	>hsa_piR_022437|gb|DQ600690|Homo	NM_001031713.3	209	-51.88	2	26	2839	2865	24	0.8333	1	||||||||||	||||||::|:
1570	uaGGUGGGCGGAGUCGGAGGGUUUCAu	|:||||||||||||||||||||||	atCTACCCGCCTCAGCCTCCCAAAGTg	>hsa_piR_022437|gb|DQ600690|Homo	NM_001031720.3	221	-59.12	2	26	3295	3321	24	0.9583	1	||||||||||	||||||||||
1571	uaGGUGGGCGGAGUCGGAGGGUUUCAu	|::||| |||||||||||||||||	atCTGCCCACCTCAGCCTCCCAAAGTg	>hsa_piR_022437|gb|DQ600690|Homo	NM_001031726.3	209	-50.83	2	26	4052	4078	24	0.875	0.9583	||||||||||	|| |||||||
1572	uaGGUGGGCGGAGUCGGAGGGUUUCAu	|| ||:||||||||||||||||||	atCCCCCTGCCTCAGCCTCCCAAAGTg	>hsa_piR_022437|gb|DQ600690|Homo	NM_001031727.4	213	-53.87	2	26	2143	2169	24	0.9167	0.9583	||||||||||	|:||||||||
1573	uaGGUGGGCGGAGUCGGAGGGUUUCAu	|| ||||||||:||||||||||||	atCCTCCCGCCTCGGCCTCCCAAAGTg	>hsa_piR_022437|gb|DQ600690|Homo	NM_001032363.4	213	-56.79	2	26	2217	2243	24	0.9167	0.9583	||||||||||	|||||||:||
1574	uaGGUGGGCGGAGUCGGAGGGUUUCAu	||:|||||||||||||||||||||	agCCGCCCGCCTCAGCCTCCCAAAGTg	>hsa_piR_022437|gb|DQ600690|Homo	NM_001032392.4	221	-60.22	2	26	2787	2813	24	0.9583	1	||||||||||	||||||||||
1575	uaggUGGGCGGAGUCGGAGGGUUUCAu	|||:||||::||||||||||||	ggtgACCTGCCTTGGCCTCCCAAAGTg	>hsa_piR_022437|gb|DQ600690|Homo	NM_001032999.3	203	-45.94	2	24	3553	3579	22	0.8636	1	||||||||||	|:||||::||
1576	uaGGUGGGCGGAGUCGGAGGGUUUCAu	|| ||| |||::||||||||||||	atCCCCCCACCTTGGCCTCCCAAAGTg	>hsa_piR_022437|gb|DQ600690|Homo	NM_001032999.3	201	-45.9	2	26	4837	4863	24	0.8333	0.9167	||||||||||	|| |||::||
1577	uaGGUGGGCGGAGUCGGAGGGUUUCAu	||: ||||||:: |||||||||||	atCCGACCGCCTTGACCTCCCAAAGTg	>hsa_piR_022437|gb|DQ600690|Homo	NM_001033030.2	197	-46.33	2	26	386	412	24	0.7917	0.9167	||||||||||	||||||:: |
1578	uagguggGCGGAGUCGGAGGGUUUCAu	| |||| |||||||||||	tcttgaaCTCCTCCACCTCCCAAAGTg	>hsa_piR_022437|gb|DQ600690|Homo	NM_001033044.4	176	-32.37	2	21	4624	4650	19	0.8421	0.8421	||||||||||	| |||| |
1579	uagguggGCGGAGUCGGAGGGUUUCAu	| |||| |||||||||||	tcttgaaCTCCTCCACCTCCCAAAGTg	>hsa_piR_022437|gb|DQ600690|Homo	NM_001033056.3	176	-32.37	2	21	4742	4768	19	0.8421	0.8421	||||||||||	| |||| |
1580	uaGGUGGGCGGAGUCGGAGGGUUUCAu	|||||:||||||||||||||||||	atCCACCTGCCTCAGCCTCCCAAAGTg	>hsa_piR_022437|gb|DQ600690|Homo	NM_001033503.3	221	-59.03	2	26	5961	5987	24	0.9583	1	||||||||||	|:||||||||
1581	uaGGUGGGCGGAGUCGGAGGGUUUCAu	||||:||||||:||||||||||||	atCCACTCGCCTCGGCCTCCCAAAGTg	>hsa_piR_022437|gb|DQ600690|Homo	NM_001033503.3	217	-58.11	2	26	5128	5154	24	0.9167	1	||||||||||	:||||||:||
1582	uaGGUGGGCGGAGUCGGAGGGUUUCAu	|::|||||||::||||||||||||	atCTGCCCGCCTTGGCCTCCCAAAGTt	>hsa_piR_022437|gb|DQ600690|Homo	NM_001033503.3	209	-50.33	2	26	2202	2228	24	0.8333	1	||||||||||	||||||::||
1583	uaGGUGGGCGGAGUCGGAGGGUUUCAu	|::||| |||||||||||||||||	atCTGCCCACCTCAGCCTCCCAAAGTg	>hsa_piR_022437|gb|DQ600690|Homo	NM_001033503.3	209	-50.83	2	26	4206	4232	24	0.875	0.9583	||||||||||	|| |||||||
1584	uaGGUGGGCGGAGUCGGAGGGUUUCAu	||:|||||||||||||||||||||	atCCGCCCGCCTCAGCCTCCCAAAGTg	>hsa_piR_022437|gb|DQ600690|Homo	NM_001033522.2	221	-61.36	2	26	3220	3246	24	0.9583	1	||||||||||	||||||||||
1585	uaGGUGGGCGGAGUCGGAGGGUUUCAu	||:||:||||||||||||||||||	atCCGCCTGCCTCAGCCTCCCAAAGTt	>hsa_piR_022437|gb|DQ600690|Homo	NM_001033522.2	217	-57.15	2	26	2676	2702	24	0.9167	1	||||||||||	|:||||||||
1586	uaGGUGGGCGGAGUCGGAGGGUUUCAu	|:: ||||||||||||||||||||	atCTGGCCGCCTCAGCCTCCCAAAGTg	>hsa_piR_022437|gb|DQ600690|Homo	NM_001033554.3	209	-51.79	2	26	3355	3381	24	0.875	0.9583	||||||||||	||||||||||
1587	uagguGGGCGGAGUCGGAGGGUUUCAu	||| |||||||||||||||||	tgatcCCCACCTCAGCCTCCCAAAGTg	>hsa_piR_022437|gb|DQ600690|Homo	NM_001033554.3	202	-47.9	2	23	2926	2952	21	0.9524	0.9524	||||||||||	|| |||||||
1588	uaGGUGGGCGGAGUCGGAGGGUUUCAu	|::||:||||||||||||||||||	atCTGCCTGCCTCAGCCTCCCAAAGTg	>hsa_piR_022437|gb|DQ600690|Homo	NM_001033555.3	213	-53.87	2	26	5633	5659	24	0.875	1	||||||||||	|:||||||||
1589	uaggUGGGCGGAGUCGGAGGGUUUCAu	:||:|||||| |||||||||||	ataaGCCTGCCTCAACCTCCCAAAGTg	>hsa_piR_022437|gb|DQ600690|Homo	NM_001033555.3	199	-43.69	2	24	6522	6548	22	0.8636	0.9545	||||||||||	|:|||||| |
1590	uaGGUGGGCGGAGUCGGAGGGUUUCAu	|||||: |||::||||||||||||	atCCACCTACCTTGGCCTCCCAAAGTg	>hsa_piR_022437|gb|DQ600690|Homo	NM_001033583.3	205	-48.11	2	26	3494	3520	24	0.8333	0.9583	||||||||||	|: |||::||
1591	uaGGUGGGCGGAGUCGGAGGGUUUCAu	||||:||||||:||||||||||||	atCCACTCGCCTCGGCCTCCCAAAGTg	>hsa_piR_022437|gb|DQ600690|Homo	NM_001033855.3	217	-58.11	2	26	4810	4836	24	0.9167	1	||||||||||	:||||||:||
1592	uaGGUGGGCGGAGUCGGAGGGUUUCAu	||||:||||||:||||||||||||	atCCACTCGCCTCGGCCTCCCAAAGTg	>hsa_piR_022437|gb|DQ600690|Homo	NM_001033857.3	217	-58.11	2	26	4895	4921	24	0.9167	1	||||||||||	:||||||:||
1593	uaGGUGGGCGGAGUCGGAGGGUUUCAu	||||:||||||:||||||||||||	atCCACTCGCCTCGGCCTCCCAAAGTg	>hsa_piR_022437|gb|DQ600690|Homo	NM_001033858.3	217	-58.11	2	26	5217	5243	24	0.9167	1	||||||||||	:||||||:||
1594	uaGGUGGGCGGAGUCGGAGGGUUUCAu	|::||||||||:||||||||||||	atCTGCCCGCCTCGGCCTCCCAAAGTg	>hsa_piR_022437|gb|DQ600690|Homo	NM_001033910.3	213	-56.02	2	26	3002	3028	24	0.875	1	||||||||||	|||||||:||
1595	uagguGGGCGGAGUCGGAGGGUUUCAu	:|:||| ||||||||||||||	gcagtTCTGCCGCAGCCTCCCAAAGTg	>hsa_piR_022437|gb|DQ600690|Homo	NM_001033930.3	194	-42.76	2	23	2347	2373	21	0.8571	0.9524	||||||||||	|:||| ||||
1596	uaGGUGGGCGGAGUCGGAGGGUUUCAu	|||||| ||||:||||||||||||	atCCACCCACCTCGGCCTCCCAAAGTg	>hsa_piR_022437|gb|DQ600690|Homo	NM_001034.4	213	-55.34	2	26	2713	2739	24	0.9167	0.9583	||||||||||	|| ||||:||
1597	uaGGUGGGCGGAGUCGGAGGGUUUCAu	|||||:||||| ||||||||||||	atCCACCTGCCTCCGCCTCCCAAAGTg	>hsa_piR_022437|gb|DQ600690|Homo	NM_001034173.4	213	-53.62	2	26	5842	5868	24	0.9167	0.9583	||||||||||	|:||||| ||
1598	uaGGUGGGCGGAGUCGGAGGGUUUCAu	|:|||:|||||:||||||||||||	atCTACCTGCCTCGGCCTCCCAAAGTg	>hsa_piR_022437|gb|DQ600690|Homo	NM_001034841.3	213	-55.67	2	26	6772	6798	24	0.875	1	||||||||||	|:|||||:||
1599	uaGGUGGGCGGAGUCGGAGGGUUUCAu	|| ||| ||||:||||||||||||	atCCTCCCACCTCGGCCTCCCAAAGTg	>hsa_piR_022437|gb|DQ600690|Homo	NM_001034841.3	205	-50.95	2	26	6390	6416	24	0.875	0.9167	||||||||||	|| ||||:||
1600	uaGGUGGGCGGAGUCGGAGGGUUUCAu	||:||||||||:||||||||||||	atCCGCCCGCCTCGGCCTCCCAAAGTg	>hsa_piR_022437|gb|DQ600690|Homo	NM_001034996.3	217	-60.71	2	26	1164	1190	24	0.9167	1	||||||||||	|||||||:||
1601	uagGUGGGCGGAGUCGGAGGGUUUCAu	|||||||||::||||||||||||	ataCACCCGCCTTGGCCTCCCAAAGTg	>hsa_piR_022437|gb|DQ600690|Homo	NM_001034996.3	212	-52.12	2	25	1994	2020	23	0.913	1	||||||||||	||||||::||
1602	uaGGUGGGCGGAGUCGGAGGGUUUCAu	|:::||||||::||||||||||||	atCTGTCCGCCTTGGCCTCCCAAAGTg	>hsa_piR_022437|gb|DQ600690|Homo	NM_001034996.3	205	-50.11	2	26	2748	2774	24	0.7917	1	||||||||||	||||||::||
1603	uaGGUGGGCGGAGUCGGAGGGUUUCAu	||||:| || |||:||||||||||	atCCACTC-CC-CAGTCTCCCAAAGTa	>hsa_piR_022437|gb|DQ600690|Homo	NM_001034996.3	189	-45.06	2	26	6631	6655	24	0.8333	0.9167	||||||||||	:| || |||:
1604	uaGGUGGGCGGAGUCGGAGGGUUUCAu	|| |::||||||||||||||||||	atCCTCTTGCCTCAGCCTCCCAAAGTg	>hsa_piR_022437|gb|DQ600690|Homo	NM_001035005.4	209	-51.91	2	26	2688	2714	24	0.875	0.9583	||||||||||	::||||||||
1605	uaGGUGGGCGGAGUCGGAGGGUUUCAu	|::||:||||::||||||||||||	atCTGCCTGCCTTGGCCTCCCAAAGTg	>hsa_piR_022437|gb|DQ600690|Homo	NM_001035005.4	205	-48.94	2	26	5233	5259	24	0.7917	1	||||||||||	|:||||::||
1606	uaGGUGGGCGGAGUCGGAGGGUUUCAu	||:||| |||||||||||||||||	atCCGCCCACCTCAGCCTCCCAAAGTg	>hsa_piR_022437|gb|DQ600690|Homo	NM_001035511.2	213	-55.52	2	26	11998	12024	24	0.9167	0.9583	||||||||||	|| |||||||
1607	uaGGUGGGCGGAGUCGGAGGGUUUCAu	|||||:||||::||||||||||||	atCCACCTGCCTTGGCCTCCCAAAGTc	>hsa_piR_022437|gb|DQ600690|Homo	NM_001035511.2	213	-51.91	2	26	12941	12967	24	0.875	1	||||||||||	|:||||::||
1608	uaGGUGGGCGGAGUCGGAGGGUUUCAu	|| : :||||||||||||||||||	atCCTTGTGCCTCAGCCTCCCAAAGTg	>hsa_piR_022437|gb|DQ600690|Homo	NM_001035511.2	201	-48.5	2	26	4952	4978	24	0.8333	0.9167	||||||||||	:||||||||
1609	uaGGUGGGCGGAGUCGGAGGGUUUCAu	||:||| |||||||||||||||||	atCCGCCCACCTCAGCCTCCCAAAGTg	>hsa_piR_022437|gb|DQ600690|Homo	NM_001035512.2	213	-55.52	2	26	12060	12086	24	0.9167	0.9583	||||||||||	|| |||||||
1610	uaGGUGGGCGGAGUCGGAGGGUUUCAu	|||||:||||::||||||||||||	atCCACCTGCCTTGGCCTCCCAAAGTc	>hsa_piR_022437|gb|DQ600690|Homo	NM_001035512.2	213	-51.91	2	26	13003	13029	24	0.875	1	||||||||||	|:||||::||
1611	uaGGUGGGCGGAGUCGGAGGGUUUCAu	|| : :||||||||||||||||||	atCCTTGTGCCTCAGCCTCCCAAAGTg	>hsa_piR_022437|gb|DQ600690|Homo	NM_001035512.2	201	-48.5	2	26	5014	5040	24	0.8333	0.9167	||||||||||	:||||||||
1612	uaGGUGGGCGGAGUCGGAGGGUUUCAu	||:||| |||||||||||||||||	atCCGCCCACCTCAGCCTCCCAAAGTg	>hsa_piR_022437|gb|DQ600690|Homo	NM_001035513.2	213	-55.52	2	26	12003	12029	24	0.9167	0.9583	||||||||||	|| |||||||
1613	uaGGUGGGCGGAGUCGGAGGGUUUCAu	|||||:||||::||||||||||||	atCCACCTGCCTTGGCCTCCCAAAGTc	>hsa_piR_022437|gb|DQ600690|Homo	NM_001035513.2	213	-51.91	2	26	12946	12972	24	0.875	1	||||||||||	|:||||::||
1614	uaGGUGGGCGGAGUCGGAGGGUUUCAu	|| : :||||||||||||||||||	atCCTTGTGCCTCAGCCTCCCAAAGTg	>hsa_piR_022437|gb|DQ600690|Homo	NM_001035513.2	201	-48.5	2	26	4957	4983	24	0.8333	0.9167	||||||||||	:||||||||
1615	uaGGUGGGCGGAGUCGGAGGGUUUCAu	||:||||||||:||||||||||||	atCCGCCCGCCTCGGCCTCCCAAAGTg	>hsa_piR_022437|gb|DQ600690|Homo	NM_001037165.2	217	-60.71	2	26	8123	8149	24	0.9167	1	||||||||||	|||||||:||
1616	uaGGUGGGCGGAGUCGGAGGGUUUCAu	|::||| ||||| |||||||||||	atCTGCCCACCTCAACCTCCCAAAGTg	>hsa_piR_022437|gb|DQ600690|Homo	NM_001037165.2	201	-44.56	2	26	9432	9458	24	0.8333	0.9167	||||||||||	|| ||||| |
1617	uaGGUGGGCGGAGUCGGAGGGUUUCAu	|||||: |||::||||||||||||	atCCACCTACCTTGGCCTCCCAAAGTg	>hsa_piR_022437|gb|DQ600690|Homo	NM_001037171.2	205	-48.11	2	26	3521	3547	24	0.8333	0.9583	||||||||||	|: |||::||
1618	uaGGUGGGCGGAGUCGGAGGGUUUCAu	|::|||||||||||||||||||||	atCTGCCCGCCTCAGCCTCCCAAAGTg	>hsa_piR_022437|gb|DQ600690|Homo	NM_001037232.4	217	-56.67	2	26	2537	2563	24	0.9167	1	||||||||||	||||||||||
1619	uagGUGGGCGGAGUCGGAGGGUUUCAu	|||:| ||||:||||||||||||	atgCACTCACCTCGGCCTCCCAAAGTg	>hsa_piR_022437|gb|DQ600690|Homo	NM_001037330.2	204	-47.48	2	25	1820	1846	23	0.8696	0.9565	||||||||||	:| ||||:||
1620	uaGGUGGGCGGAGUCGGAGGGUUUCAu	|||||:||||::||||||||||||	gtCCACCTGCCTTGGCCTCCCAAAGTg	>hsa_piR_022437|gb|DQ600690|Homo	NM_001037813.4	213	-53.79	2	26	2875	2901	24	0.875	1	||||||||||	|:||||::||
1621	uaGGUGGGCGGAGUCGGAGGGUUUCAu	||:||| ||||:||||||||||||	atCCGCCCACCTCGGCCTCCCAAAGTg	>hsa_piR_022437|gb|DQ600690|Homo	NM_001037813.4	209	-54.87	2	26	2732	2758	24	0.875	0.9583	||||||||||	|| ||||:||
1622	uaGGUGGGCGGAGUCGGAGGGUUUCAu	||||||||||||||||||||||||	atCCACCCGCCTCAGCCTCCCAAAGTg	>hsa_piR_022437|gb|DQ600690|Homo	NM_001038603.3	225	-61.83	2	26	3161	3187	24	1	1	||||||||||	||||||||||
1623	uaGGUGGGCGGAGUCGGAGGGUUUCAu	||||||||||::||||||||||||	atCCACCCGCCTTGGCCTCCCAAAGTg	>hsa_piR_022437|gb|DQ600690|Homo	NM_001038618.3	217	-56.9	2	26	2110	2136	24	0.9167	1	||||||||||	||||||::||
1624	uaGGUGGGCGGAGUCGGAGGGUUUCAu	|: ||| |:|||||||||||||||	atCTTCCCACTTCAGCCTCCCAAAGTg	>hsa_piR_022437|gb|DQ600690|Homo	NM_001039.4	201	-45.43	2	26	3300	3326	24	0.8333	0.9167	||||||||||	|| |:|||||
1625	uaGGUGGGCGGAGUCGGAGGGUUUCAu	||:||||||||:||||||||||||	atCCGCCCGCCTCGGCCTCCCAAAGTg	>hsa_piR_022437|gb|DQ600690|Homo	NM_001039127.6	217	-60.71	2	26	2912	2938	24	0.9167	1	||||||||||	|||||||:||
1626	uaGGUGGGCGGAGUCGGAGGGUUUCAu	|||||| |||||||||||||||||	atCCACCCTCCTCAGCCTCCCAAAGTg	>hsa_piR_022437|gb|DQ600690|Homo	NM_001039535.3	217	-55.6	2	26	1334	1360	24	0.9583	0.9583	||||||||||	|| |||||||
1627	uaGGUGGGCGGAGUCGGAGGGUUUCAu	||:||| ||||:||||||||||||	atCCGCCCACCTCGGCCTCCCAAAGTg	>hsa_piR_022437|gb|DQ600690|Homo	NM_001039535.3	209	-54.87	2	26	1694	1720	24	0.875	0.9583	||||||||||	|| ||||:||
1628	uaGGUGGGCGGAGUCGGAGGGUUUCAu	|||||| ||||:||||||||||||	acCCACCCACCTCGGCCTCCCAAAGTg	>hsa_piR_022437|gb|DQ600690|Homo	NM_001039547.3	213	-53.22	2	26	4566	4592	24	0.9167	0.9583	||||||||||	|| ||||:||
1629	uaGGUGGGCGGAGUCGGAGGGUUUCAu	|| ||| |||::||||||||||||	atCCTCCCACCTTGGCCTCCCAAAGTg	>hsa_piR_022437|gb|DQ600690|Homo	NM_001039547.3	201	-46.67	2	26	3568	3594	24	0.8333	0.9167	||||||||||	|| |||::||
1630	uaGGUGGGCGGAGUCGGAGGGUUUCAu	|:: |||||||:||||||||||||	atCTGGCCGCCTCGGCCTCCCAAAGTg	>hsa_piR_022437|gb|DQ600690|Homo	NM_001039590.3	205	-51.14	2	26	10811	10837	24	0.8333	0.9583	||||||||||	|||||||:||
1631	uaGGUGGGCGGAGUCGGAGGGUUUCAu	|:: |||||||:||||||||||||	atCTGGCCGCCTCGGCCTCCCAAAGTg	>hsa_piR_022437|gb|DQ600690|Homo	NM_001039591.3	205	-51.14	2	26	10763	10789	24	0.8333	0.9583	||||||||||	|||||||:||
1632	uaGGUGGGCGGAGUCGGAGGGUUUCAu	|||||:||||::||||||||||||	atCCACCTGCCTTGGCCTCCCAAAGTg	>hsa_piR_022437|gb|DQ600690|Homo	NM_001039614.2	213	-54.1	2	26	4776	4802	24	0.875	1	||||||||||	|:||||::||
1633	uaGGUGGGCGGAGUCGGAGGGUUUCAu	:|::| ||||||||||||||||||	atTCGTCAGCCTCAGCCTCCCAAAGTc	>hsa_piR_022437|gb|DQ600690|Homo	NM_001039614.2	205	-46.01	2	26	2682	2708	24	0.8333	0.9583	||||||||||	| ||||||||
1634	uaGGUGGGCGGAGUCGGAGGGUUUCAu	||:||| :||||||||||||||||	atCCGCCCATCTCAGCCTCCCAAAGTg	>hsa_piR_022437|gb|DQ600690|Homo	NM_001039656.1	209	-53.51	2	26	2067	2093	24	0.875	0.9583	||||||||||	|| :||||||
1635	uagGUGGGCGGAGUCGGAGGGUUUCAu	||||| |||::||||||||||||	ataCACCCACCTTGGCCTCCCAAAGTg	>hsa_piR_022437|gb|DQ600690|Homo	NM_001039670.3	204	-46.28	2	25	2958	2984	23	0.8696	0.9565	||||||||||	|| |||::||
1636	uaggUGGGCGGAGUCGGAGGGUUUCAu	|||:||||::||||||||||||	ggtgACCTGCCTTGGCCTCCCAAAGTg	>hsa_piR_022437|gb|DQ600690|Homo	NM_001039709.1	203	-45.94	2	24	3657	3683	22	0.8636	1	||||||||||	|:||||::||
1637	uaGGUGGGCGGAGUCGGAGGGUUUCAu	|| ||| |||::||||||||||||	atCCCCCCACCTTGGCCTCCCAAAGTg	>hsa_piR_022437|gb|DQ600690|Homo	NM_001039709.1	201	-45.9	2	26	4941	4967	24	0.8333	0.9167	||||||||||	|| |||::||
1638	uaGGUGGGCGGAGUCGGAGGGUUUCAu	||:||||||||:||||||||||||	atCCGCCCGCCTCGGCCTCCCAAAGTg	>hsa_piR_022437|gb|DQ600690|Homo	NM_001039802.2	217	-60.71	2	26	3805	3831	24	0.9167	1	||||||||||	|||||||:||
1639	uaGGUGGGCGGAGUCGGAGGGUUUCAu	||:|||||||::||||||||||||	atCCGCCCGCCTTGGCCTCCCAAAGTg	>hsa_piR_022437|gb|DQ600690|Homo	NM_001039802.2	213	-56.43	2	26	4777	4803	24	0.875	1	||||||||||	||||||::||
1640	uaGGUGGGCGGAGUCGGAGGGUUUCAu	||:||| |||||||||||||||||	atCCGCCCTCCTCAGCCTCCCAAAGTg	>hsa_piR_022437|gb|DQ600690|Homo	NM_001039802.2	213	-55.13	2	26	5467	5493	24	0.9167	0.9583	||||||||||	|| |||||||
1641	uaGGUGGGCGGAGUCGGAGGGUUUCAu	|||||||||||:||||||||||||	atCCACCCGCCTCGGCCTCCCAAAGTg	>hsa_piR_022437|gb|DQ600690|Homo	NM_001039887.3	221	-61.18	2	26	2483	2509	24	0.9583	1	||||||||||	|||||||:||
1642	uaGGUGGGCGGAGUCGGAGGGUUUCAu	|||||| |||||||||||||||||	tcCCACCCACCTCAGCCTCCCAAAGTg	>hsa_piR_022437|gb|DQ600690|Homo	NM_001039887.3	217	-53.87	2	26	3215	3241	24	0.9583	0.9583	||||||||||	|| |||||||
1643	uaGGUGGGCGGAGUCGGAGGGUUUCAu	||:|||||||||||||||||||||	atCCGCCCGCCTCAGCCTCCCAAAGTg	>hsa_piR_022437|gb|DQ600690|Homo	NM_001039891.3	221	-61.36	2	26	3117	3143	24	0.9583	1	||||||||||	||||||||||
1644	uaGGUGGGCGGAGUCGGAGGGUUUCAu	||:||||||||:||||||||||||	atCCGCCCGCCTCGGCCTCCCAAAGTg	>hsa_piR_022437|gb|DQ600690|Homo	NM_001039938.2	217	-60.71	2	26	11858	11884	24	0.9167	1	||||||||||	|||||||:||
1645	uaGGUGGGCGGAGUCGGAGGGUUUCAu	||:||| ||||:||||||||||||	atCCGCCCACCTCGGCCTCCCAAAGTg	>hsa_piR_022437|gb|DQ600690|Homo	NM_001039938.2	209	-54.87	2	26	7348	7374	24	0.875	0.9583	||||||||||	|| ||||:||
1646	uaGGUGGGCGGAGUCGGAGGGUUUCAu	|| :|:||||||||||||||||||	atCCTTCTGCCTCAGCCTCCCAAAGTg	>hsa_piR_022437|gb|DQ600690|Homo	NM_001039938.2	209	-52.11	2	26	14088	14114	24	0.875	0.9583	||||||||||	|:||||||||
1647	uaGGUGGGCGGAGUCGGAGGGUUUCAu	|::||| |||::||||||||||||	atCTGCCCACCTTGGCCTCCCAAAGTg	>hsa_piR_022437|gb|DQ600690|Homo	NM_001039938.2	201	-45.9	2	26	4038	4064	24	0.7917	0.9583	||||||||||	|| |||::||
1648	uaGGUGGGCGGAGUCGGAGGGUUUCAu	|| ||| ||||:|:||||||||||	gtCCTCCCACCTCGGTCTCCCAAAGTg	>hsa_piR_022437|gb|DQ600690|Homo	NM_001039938.2	201	-48.35	2	26	14844	14870	24	0.8333	0.9167	||||||||||	|| ||||:|:
1649	uaGGUGGGCGGAGUCGGAGGGUUUCAu	|||||| |||||||||||||||||	atCCACCCACCTCAGCCTCCCAAAGTg	>hsa_piR_022437|gb|DQ600690|Homo	NM_001039960.3	217	-55.99	2	26	7629	7655	24	0.9583	0.9583	||||||||||	|| |||||||
1650	uaGGUGGGCGGAGUCGGAGGGUUUCAu	||||||||||::||||||||||||	atCCACCCGCCTTGGCCTCCCAAAGTg	>hsa_piR_022437|gb|DQ600690|Homo	NM_001039960.3	217	-56.9	2	26	9693	9719	24	0.9167	1	||||||||||	||||||::||
1651	uaGGUGGGCGGAGUCGGAGGGUUUCAu	|::||: ::|::||||||||||||	atCTGCCTATTTTGGCCTCCCAAAGTg	>hsa_piR_022437|gb|DQ600690|Homo	NM_001040061.3	189	-39.52	2	26	3357	3383	24	0.6667	0.9583	||||||||||	|: ::|::||
1652	uaGGUGGGCGGAGUCGGAGGGUUUCAu	|||||| |||||||||||||||||	acCCACCCACCTCAGCCTCCCAAAGTg	>hsa_piR_022437|gb|DQ600690|Homo	NM_001040151.1	217	-53.87	2	26	2288	2314	24	0.9583	0.9583	||||||||||	|| |||||||
1653	uaGGUGGGCGGAGUCGGAGGGUUUCAu	|||||| ||||:||||||||||||	atCCACCCACCTCGGCCTCCCAAAGTg	>hsa_piR_022437|gb|DQ600690|Homo	NM_001040185.3	213	-55.34	2	26	4094	4120	24	0.9167	0.9583	||||||||||	|| ||||:||
1654	uaGGUGGGCGGAGUCGGAGGGUUUCAu	|::|||||||||||||||||||||	atCTGCCCGCCTCAGCCTCCCAAAGTg	>hsa_piR_022437|gb|DQ600690|Homo	NM_001040441.3	217	-56.67	2	26	4503	4529	24	0.9167	1	||||||||||	||||||||||
1655	uaGGUGGGCGGAGUCGGAGGGUUUCAu	||:||| ||||:||||||||||||	atCCGCCCCCCTCGGCCTCCCAAAGTg	>hsa_piR_022437|gb|DQ600690|Homo	NM_001040441.3	209	-54	2	26	3926	3952	24	0.875	0.9583	||||||||||	|| ||||:||
1656	uaGGUGGGCGGAGUCGGAGGGUUUCAu	|||||:||||||||||||||||||	atCCACCTGCCTCAGCCTCCCAAAGTg	>hsa_piR_022437|gb|DQ600690|Homo	NM_001040661.2	221	-59.03	2	26	4601	4627	24	0.9583	1	||||||||||	|:||||||||
1657	uaGGUGGGCGGAGUCGGAGGGUUUCAu	||:||:||||::||||||||||||	atCCGCCTGCCTTGGCCTCCCAAAGTg	>hsa_piR_022437|gb|DQ600690|Homo	NM_001040661.2	209	-53.63	2	26	5378	5404	24	0.8333	1	||||||||||	|:||||::||
1658	uaGGUGGGCGGAGUCGGAGGGUUUCAu	|||:|:|:|||| |||||||||||	atCCATCTGTCTCATCCTCCCAAAGTg	>hsa_piR_022437|gb|DQ600690|Homo	NM_001040661.2	205	-48.12	2	26	3548	3574	24	0.8333	0.9583	||||||||||	|:|:|||| |
1659	uaGGUGGGCGGAGUCGGAGGGUUUCAu	|| ||:||||::||||||||||||	ttCCCCCTGCCTTGGCCTCCCAAAGTg	>hsa_piR_022437|gb|DQ600690|Homo	NM_001040661.2	205	-47.76	2	26	3860	3886	24	0.8333	0.9583	||||||||||	|:||||::||
1660	uaGGUGGGCGGAGUCGGAGGGUUUCAu	||:||: |||::||||||||||||	atCCGCCTCCCTTGGCCTCCCAAAGTg	>hsa_piR_022437|gb|DQ600690|Homo	NM_001040661.2	201	-47.26	2	26	4893	4919	24	0.7917	0.9583	||||||||||	|: |||::||
1661	uaGGUGGGCGGAGUCGGAGGGUUUCAu	||||: ||||||||||||||||||	atCCACTAGCCTCAGCCTCCCAAAGTg	>hsa_piR_022437|gb|DQ600690|Homo	NM_001040663.2	213	-52.31	2	26	1669	1695	24	0.9167	0.9583	||||||||||	: ||||||||
1662	uaGGUGGGCGGAGUCGGAGGGUUUCAu	|::||:||||||||||||||||||	atCTGCCTGCCTCAGCCTCCCAAAGTg	>hsa_piR_022437|gb|DQ600690|Homo	NM_001042.3	213	-53.87	2	26	2481	2507	24	0.875	1	||||||||||	|:||||||||
1663	uaGGUGGGCGGAGUCGGAGGGUUUCAu	||:||| |:|||||||||||||||	atCCGCCCACTTCAGCCTCCCAAAGTg	>hsa_piR_022437|gb|DQ600690|Homo	NM_001042461.3	209	-52.58	2	26	1412	1438	24	0.875	0.9583	||||||||||	|| |:|||||
1664	uaGGUGGGCGGAGUCGGAGGGUUUCAu	|::|||||||::||||||||||||	atCTGCCCGCCTTGGCCTCCCAAAGTg	>hsa_piR_022437|gb|DQ600690|Homo	NM_001042461.3	209	-51.74	2	26	4702	4728	24	0.8333	1	||||||||||	||||||::||
1665	uaGGUGGGCGGAGUCGGAGGGUUUCAu	||:||| |:|||||||||||||||	atCCGCCCACTTCAGCCTCCCAAAGTg	>hsa_piR_022437|gb|DQ600690|Homo	NM_001042462.2	209	-52.58	2	26	1264	1290	24	0.875	0.9583	||||||||||	|| |:|||||
1666	uaGGUGGGCGGAGUCGGAGGGUUUCAu	|::|||||||::||||||||||||	atCTGCCCGCCTTGGCCTCCCAAAGTg	>hsa_piR_022437|gb|DQ600690|Homo	NM_001042462.2	209	-51.74	2	26	4554	4580	24	0.8333	1	||||||||||	||||||::||
1667	uaGGUGGGCGGAGUCGGAGGGUUUCAu	|| ||| ||||: |||||||||||	atCCTCCCACCTCGACCTCCCAAAGTg	>hsa_piR_022437|gb|DQ600690|Homo	NM_001042468.3	197	-45.65	2	26	1832	1858	24	0.8333	0.875	||||||||||	|| ||||: |
1668	uaGGUGGGCGGAGUCGGAGGGUUUCAu	|| ||| ||||: |||||||||||	atCCTCCCACCTCGACCTCCCAAAGTg	>hsa_piR_022437|gb|DQ600690|Homo	NM_001042469.3	197	-45.65	2	26	1778	1804	24	0.8333	0.875	||||||||||	|| ||||: |
1669	uaGGUGGGCGGAGUCGGAGGGUUUCAu	|| ||| ||||: |||||||||||	atCCTCCCACCTCGACCTCCCAAAGTg	>hsa_piR_022437|gb|DQ600690|Homo	NM_001042470.3	197	-45.65	2	26	1571	1597	24	0.8333	0.875	||||||||||	|| ||||: |
1670	uaGGUGGGCGGAGUCGGAGGGUUUCAu	|::||:|||||:||||||||||||	atCTGCCTGCCTCGGCCTCCCAAAGTg	>hsa_piR_022437|gb|DQ600690|Homo	NM_001042473.4	209	-53.22	2	26	3065	3091	24	0.8333	1	||||||||||	|:|||||:||
1671	uaGGUGGGCGGAGUCGGAGGGUUUCAu	|||||| |||::||||||||||||	atCCACCCACCTTGGCCTCCCAAAGTg	>hsa_piR_022437|gb|DQ600690|Homo	NM_001042483.2	209	-51.06	2	26	1920	1946	24	0.875	0.9583	||||||||||	|| |||::||
1672	uaGGUGGGCGGAGUCGGAGGGUUUCAu	|::||:||||::||||||||||||	atCTGCCTGCCTTGGCCTCCCAAAGTg	>hsa_piR_022437|gb|DQ600690|Homo	NM_001042483.2	205	-48.94	2	26	4142	4168	24	0.7917	1	||||||||||	|:||||::||
1673	uaGGUGGGCGGAGUCGGAGGGUUUCAu	||:|||||||::||||||||||||	atCCGCCCGCCTTGGCCTCCCAAAGTg	>hsa_piR_022437|gb|DQ600690|Homo	NM_001042494.2	213	-56.43	2	26	6574	6600	24	0.875	1	||||||||||	||||||::||
1674	uaGGUGGGCGGAGUCGGAGGGUUUCAu	||:|||||||::||||||||||||	atCCGCCCGCCTTGGCCTCCCAAAGTg	>hsa_piR_022437|gb|DQ600690|Homo	NM_001042495.2	213	-56.43	2	26	6221	6247	24	0.875	1	||||||||||	||||||::||
1675	uaGGUGGGCGGAGUCGGAGGGUUUCAu	||:|||||||::||||||||||||	atCCGCCCGCCTTGGCCTCCCAAAGTg	>hsa_piR_022437|gb|DQ600690|Homo	NM_001042496.2	213	-56.43	2	26	6640	6666	24	0.875	1	||||||||||	||||||::||
1676	uaGGUGGGCGGAGUCGGAGGGUUUCAu	||:|||||||::||||||||||||	atCCGCCCGCCTTGGCCTCCCAAAGTg	>hsa_piR_022437|gb|DQ600690|Homo	NM_001042497.2	213	-56.43	2	26	6494	6520	24	0.875	1	||||||||||	||||||::||
1677	uaGGUGGGCGGAGUCGGAGGGUUUCAu	|||||:||||||||||||||||||	atCCACCTGCCTCAGCCTCCCAAAGTg	>hsa_piR_022437|gb|DQ600690|Homo	NM_001042522.2	221	-59.03	2	26	3666	3692	24	0.9583	1	||||||||||	|:||||||||
1678	uaGGUGGGCGGAGUCGGAGGGUUUCAu	||:||| |||| ||||||||||||	atCCGCCCACCTCTGCCTCCCAAAGTg	>hsa_piR_022437|gb|DQ600690|Homo	NM_001042549.2	205	-51.18	2	26	6137	6163	24	0.875	0.9167	||||||||||	|| |||| ||
1679	uaGGUGGGCGGAGUCGGAGGGUUUCAu	||||:|||| ::||||||||||||	atCCACTCGCCCTGGCCTCCCAAAGTg	>hsa_piR_022437|gb|DQ600690|Homo	NM_001042549.2	205	-51.34	2	26	9324	9350	24	0.8333	0.9583	||||||||||	:|||| ::||
1680	uaGGUGGGCGGAGUCGGAGGGUUUCAu	||:||||||||:||||||||||||	atCCGCCCGCCTCGGCCTCCCAAAGTg	>hsa_piR_022437|gb|DQ600690|Homo	NM_001042552.3	217	-60.71	2	26	1459	1485	24	0.9167	1	||||||||||	|||||||:||
1681	uaGGUGGGCGGAGUCGGAGGGUUUCAu	||:||||||||:||||||||||||	atCCGCCCGCCTCGGCCTCCCAAAGTg	>hsa_piR_022437|gb|DQ600690|Homo	NM_001042553.2	217	-60.71	2	26	1522	1548	24	0.9167	1	||||||||||	|||||||:||
1682	uaGGUGGGCGGAGUCGGAGGGUUUCAu	|||||||||||:||||||||||||	atCCACCCGCCTCGGCCTCCCAAAGTg	>hsa_piR_022437|gb|DQ600690|Homo	NM_001042590.4	221	-61.18	2	26	4788	4814	24	0.9583	1	||||||||||	|||||||:||
1683	uaGGUGGGCGGAGUCGGAGGGUUUCAu	|| ||| ||||:|:||||||||||	atCCTCCCACCTCGGTCTCCCAAAGTg	>hsa_piR_022437|gb|DQ600690|Homo	NM_001042590.4	201	-48.66	2	26	7485	7511	24	0.8333	0.9167	||||||||||	|| ||||:|:
1684	uaGGUGGGCGGAGUCGGAGGGUUUCAu	|::||||||||: |||||||||||	gtCTGCCCGCCTCGACCTCCCAAAGTg	>hsa_piR_022437|gb|DQ600690|Homo	NM_001042697.2	205	-50.41	2	26	1102	1128	24	0.8333	0.9583	||||||||||	|||||||: |
1685	uaGGUGGGCGGAGUCGGAGGGUUUCAu	|::||||||||: |||||||||||	gtCTGCCCGCCTCGACCTCCCAAAGTg	>hsa_piR_022437|gb|DQ600690|Homo	NM_001042698.2	205	-50.41	2	26	972	998	24	0.8333	0.9583	||||||||||	|||||||: |
1686	uaGGUGGGCGGAGUCGGAGGGUUUCAu	||||:: ||||:||||||||||||	atCCACTTTCCTCGGCCTCCCAAAGTg	>hsa_piR_022437|gb|DQ600690|Homo	NM_001042702.5	205	-49.28	2	26	2021	2047	24	0.8333	0.9583	||||||||||	:: ||||:||
1687	uaGGUGGGCGGAGUCGGAGGGUUUCAu	|||||||||||:||||||||||||	gtCCACCCGCCTCGGCCTCCCAAAGTg	>hsa_piR_022437|gb|DQ600690|Homo	NM_001043318.3	221	-60.87	2	26	6340	6366	24	0.9583	1	||||||||||	|||||||:||
1688	uaGGUGGGCGGAGUCGGAGGGUUUCAu	|||||| |||||||||||||||||	atCCACCCACCTCAGCCTCCCAAAGTg	>hsa_piR_022437|gb|DQ600690|Homo	NM_001048183.3	217	-55.99	2	26	5058	5084	24	0.9583	0.9583	||||||||||	|| |||||||
1689	uaGGUGGGCGGAGUCGGAGGGUUUCAu	|::||| :||: ||||||||||||	atCTGCCCATCTTCGCCTCCCAAAGTt	>hsa_piR_022437|gb|DQ600690|Homo	NM_001048183.3	193	-39.69	2	26	5399	5425	24	0.75	0.9167	||||||||||	|| :||: ||
1690	uaGGUGGGCGGAGUCGGAGGGUUUCAu	||:|||||:||:||||||||||||	atCCGCCCGCTTCGGCCTCCCAAAGTg	>hsa_piR_022437|gb|DQ600690|Homo	NM_001048210.3	213	-57.77	2	26	3661	3687	24	0.875	1	||||||||||	||||:||:||
1691	uaGGUGGGCGGAGUCGGAGGGUUUCAu	||:||| : ||:||||||||||||	acCCGCCCTTGTCGGCCTCCCAAAGTg	>hsa_piR_022437|gb|DQ600690|Homo	NM_001048210.3	197	-45.54	2	26	2277	2303	24	0.7917	0.9167	||||||||||	|| : ||:||
1692	uaggugggcggagUCGGAGGGUUUCAu	|||||||||||||	cactgaagctgagAGCCTCCCAAAGTg	>hsa_piR_022437|gb|DQ600690|Homo	NM_001056.4	170	-32.81	2	15	2	28	13	1	1	||||||||||	|||
1693	uaGGUGGGCGGAGUCGGAGGGUUUCAu	:|||| ||||||||||||||||||	atTCACCAGCCTCAGCCTCCCAAAGTg	>hsa_piR_022437|gb|DQ600690|Homo	NM_001060.6	213	-51.44	2	26	1992	2018	24	0.9167	0.9583	||||||||||	| ||||||||
1694	uaGGUGGGCGGAGUCGGAGGGUUUCAu	|::||| ||||:||||||||||||	atCTGCCCACCTCGGCCTCCCAAAGTg	>hsa_piR_022437|gb|DQ600690|Homo	NM_001063.4	205	-50.18	2	26	19340	19366	24	0.8333	0.9583	||||||||||	|| ||||:||
1695	uaGGUGGGCGGAGUCGGAGGGUUUCAu	|| ||:||||::||||||||||||	atCCTCCTGCCTTGGCCTCCCAAAGTg	>hsa_piR_022437|gb|DQ600690|Homo	NM_001077196.2	205	-49.71	2	26	6197	6223	24	0.8333	0.9583	||||||||||	|:||||::||
1696	uaGGUGGGCGGAGUCGGAGGGUUUCAu	|| ||:||||::||||||||||||	atCCTCCTGCCTTGGCCTCCCAAAGTg	>hsa_piR_022437|gb|DQ600690|Homo	NM_001077197.2	205	-49.71	2	26	6710	6736	24	0.8333	0.9583	||||||||||	|:||||::||
1697	uaGGUGGGCGGAGUCGGAGGGUUUCAu	||||||||||::||||||||||||	atCCACCCGCCTTGGCCTCCCAAAGTg	>hsa_piR_022437|gb|DQ600690|Homo	NM_001077351.2	217	-56.9	2	26	8073	8099	24	0.9167	1	||||||||||	||||||::||
1698	uaGGUGGGCGGAGUCGGAGGGUUUCAu	|||||| ||||:||||||||||||	atCCACCCACCTCGGCCTCCCAAAGTg	>hsa_piR_022437|gb|DQ600690|Homo	NM_001077351.2	213	-55.34	2	26	8716	8742	24	0.9167	0.9583	||||||||||	|| ||||:||
1699	uaGGUGGGCGGAGUCGGAGGGUUUCAu	|| ||| |||:|||||||||||||	atCCTCCCTCCTTAGCCTCCCAAAGTg	>hsa_piR_022437|gb|DQ600690|Homo	NM_001077351.2	205	-48.74	2	26	7644	7670	24	0.875	0.9167	||||||||||	|| |||:|||
1700	uaGGUGGGCGGAGUCGGAGGGUUUCAu	||||||||||::||||||||||||	atCCACCCGCCTTGGCCTCCCAAAGTg	>hsa_piR_022437|gb|DQ600690|Homo	NM_001077352.2	217	-56.9	2	26	7971	7997	24	0.9167	1	||||||||||	||||||::||
1701	uaGGUGGGCGGAGUCGGAGGGUUUCAu	|||||| ||||:||||||||||||	atCCACCCACCTCGGCCTCCCAAAGTg	>hsa_piR_022437|gb|DQ600690|Homo	NM_001077352.2	213	-55.34	2	26	8614	8640	24	0.9167	0.9583	||||||||||	|| ||||:||
1702	uaGGUGGGCGGAGUCGGAGGGUUUCAu	|| ||| |||:|||||||||||||	atCCTCCCTCCTTAGCCTCCCAAAGTg	>hsa_piR_022437|gb|DQ600690|Homo	NM_001077352.2	205	-48.74	2	26	7542	7568	24	0.875	0.9167	||||||||||	|| |||:|||
1703	uaGGUGGGCGGAGUCGGAGGGUUUCAu	|| ||:||||::||||||||||||	atCCTCCTGCCTTGGCCTCCCAAAGTg	>hsa_piR_022437|gb|DQ600690|Homo	NM_001077358.2	205	-49.71	2	26	6420	6446	24	0.8333	0.9583	||||||||||	|:||||::||
1704	uaGGUGGGCGGAGUCGGAGGGUUUCAu	|||||: |||||||||||||||||	ttCCACCTACCTCAGCCTCCCAAAGTg	>hsa_piR_022437|gb|DQ600690|Homo	NM_001077401.2	213	-51.86	2	26	2682	2708	24	0.9167	0.9583	||||||||||	|: |||||||
1705	uaGGUGGGCGGAGUCGGAGGGUUUCAu	|||||| |||||||||||||||||	atCCACCCACCTCAGCCTCCCAAAGTg	>hsa_piR_022437|gb|DQ600690|Homo	NM_001077619.2	217	-55.99	2	26	1883	1909	24	0.9583	0.9583	||||||||||	|| |||||||
1706	uaGGUGGGCGGAGUCGGAGGGUUUCAu	||||||||||||||||||||||||	atCCACCCGCCTCAGCCTCCCAAAGTg	>hsa_piR_022437|gb|DQ600690|Homo	NM_001077690.1	225	-61.83	2	26	3836	3862	24	1	1	||||||||||	||||||||||
1707	uaGGUGGGCGGAGUCGGAGGGUUUCAu	||||||||||||||||||||||||	atCCACCCGCCTCAGCCTCCCAAAGTg	>hsa_piR_022437|gb|DQ600690|Homo	NM_001077691.2	225	-61.83	2	26	4154	4180	24	1	1	||||||||||	||||||||||
1708	uaGGUGGGCGGAGUCGGAGGGUUUCAu	||||||||||||||||||||||||	atCCACCCGCCTCAGCCTCCCAAAGTg	>hsa_piR_022437|gb|DQ600690|Homo	NM_001077692.2	225	-61.83	2	26	4133	4159	24	1	1	||||||||||	||||||||||
1709	uaGGUGGGCGGAGUCGGAGGGUUUCAu	|::||:||||::||||||||||||	atCTGCCTGCCTTGGCCTCCCAAAGTg	>hsa_piR_022437|gb|DQ600690|Homo	NM_001078166.2	205	-48.94	2	26	3672	3698	24	0.7917	1	||||||||||	|:||||::||
1710	uaGGUGGGCGGAGUCGGAGGGUUUCAu	:| ||: :||||||||||||||||	atTCTCCTATCTCAGCCTCCCAAAGTg	>hsa_piR_022437|gb|DQ600690|Homo	NM_001079524.2	197	-44.59	2	26	1919	1945	24	0.7917	0.9167	||||||||||	|: :||||||
1711	uaGGUGGGCGGAGUCGGAGGGUUUCAu	:| ||: :||||||||||||||||	atTCTCCTATCTCAGCCTCCCAAAGTg	>hsa_piR_022437|gb|DQ600690|Homo	NM_001079525.2	197	-44.59	2	26	1940	1966	24	0.7917	0.9167	||||||||||	|: :||||||
1712	uaGGUGGGCGGAGUCGGAGGGUUUCAu	||:||| |||||||||||||||||	atCCGCCCACCTCAGCCTCCCAAAGTg	>hsa_piR_022437|gb|DQ600690|Homo	NM_001079815.1	213	-55.52	2	26	122	148	24	0.9167	0.9583	||||||||||	|| |||||||
1713	uaGGUGGGCGGAGUCGGAGGGUUUCAu	||:||| |||::||||||||||||	atCCGCCCACCTTGGCCTCCCAAAGTg	>hsa_piR_022437|gb|DQ600690|Homo	NM_001079815.1	205	-50.59	2	26	2219	2245	24	0.8333	0.9583	||||||||||	|| |||::||
1714	uaGGUGGGCGGAGUCGGAGGGUUUCAu	|||||:|| |||||||||||||||	atCCACCTGCGTCAGCCTCCCAAAGTg	>hsa_piR_022437|gb|DQ600690|Homo	NM_001079867.1	213	-53.86	2	26	2015	2041	24	0.9167	0.9583	||||||||||	|:|| |||||
1715	uaGGUGGGCGGAGUCGGAGGGUUUCAu	|| ||: || ::||||||||||||	gtCCTCCTACCCTGGCCTCCCAAAGTt	>hsa_piR_022437|gb|DQ600690|Homo	NM_001079867.1	189	-39.51	2	26	3356	3382	24	0.75	0.875	||||||||||	|: || ::||
1716	uaGGUGGGCGGAGUCGGAGGGUUUCAu	|||||| |||:: |||||||||||	atCCACCCACCTTGCCCTCCCAAAGTg	>hsa_piR_022437|gb|DQ600690|Homo	NM_001079906.2	201	-46.16	2	26	2834	2860	24	0.8333	0.9167	||||||||||	|| |||:: |
1717	uaGGUGGGCGGAGUCGGAGGGUUUCAu	|||||| |||:: |||||||||||	atCCACCCACCTTGCCCTCCCAAAGTg	>hsa_piR_022437|gb|DQ600690|Homo	NM_001079907.1	201	-46.16	2	26	2920	2946	24	0.8333	0.9167	||||||||||	|| |||:: |
1718	uaGGUGGGCGGAGUCGGAGGGUUUCAu	|||||| ||||:||||||||||||	atCCACCCACCTCGGCCTCCCAAAGTg	>hsa_piR_022437|gb|DQ600690|Homo	NM_001080124.2	213	-55.34	2	26	1874	1900	24	0.9167	0.9583	||||||||||	|| ||||:||
1719	uaGGUGGGCGGAGUCGGAGGGUUUCAu	|||||| ||||:||||||||||||	atCCACCCACCTCGGCCTCCCAAAGTg	>hsa_piR_022437|gb|DQ600690|Homo	NM_001080125.2	213	-55.34	2	26	2078	2104	24	0.9167	0.9583	||||||||||	|| ||||:||
1720	uaGGUGGGCGGAGUCGGAGGGUUUCAu	|||||| ||||:||||||||||||	atCCACCCACCTCGGCCTCCCAAAGTg	>hsa_piR_022437|gb|DQ600690|Homo	NM_001080391.2	213	-55.34	2	26	4528	4554	24	0.9167	0.9583	||||||||||	|| ||||:||
1721	uaGGUGGGCGGAGUCGGAGGGUUUCAu	|::||:||||||||||||||||||	atCTGCCTGCCTCAGCCTCCCAAAGTg	>hsa_piR_022437|gb|DQ600690|Homo	NM_001080393.2	213	-53.87	2	26	2532	2558	24	0.875	1	||||||||||	|:||||||||
1722	uaGGUGGGCGG-AGUC--GGAGGGUUUCAu	:|||| ||| ||| |||||||||||	ggTCACCAGCCACCAGCTCCTCCCAAAGTg	>hsa_piR_022437|gb|DQ600690|Homo	NM_001080394.4	183	-38.42	2	26	986	1015	27	0.7778	0.8148	||||||||||	|| ||| |
1723	uaggUGGGCGG--AGU-CGGAGGGUUUCAu	|:||||| |:| ||||||||||||	ggagATCCGCCGATTAGGCCTCCCAAAGTg	>hsa_piR_022437|gb|DQ600690|Homo	NM_001080396.3	185	-40.8	2	24	6573	6602	25	0.8	0.88	||||||||||	|| |:| ||
1724	uaGGUGGGCGGAGUCGGAGGGUUUCAu	|::|:| |||||||||||||||||	atCTGCTCTCCTCAGCCTCCCAAAGTa	>hsa_piR_022437|gb|DQ600690|Homo	NM_001080407.3	205	-47.47	2	26	2575	2601	24	0.8333	0.9583	||||||||||	:| |||||||
1725	uaGGUGGGCGGAGUCGGAGGGUUUCAu	||||||||||::||||||||||||	atCCACCCGCCTTGGCCTCCCAAAGTg	>hsa_piR_022437|gb|DQ600690|Homo	NM_001080409.3	217	-56.9	2	26	5899	5925	24	0.9167	1	||||||||||	||||||::||
1726	uaGGUGGGCGGAGUCGGAGGGUUUCAu	|::||||||||:||||||||||||	atCTGCCCGCCTCGGCCTCCCAAAGTg	>hsa_piR_022437|gb|DQ600690|Homo	NM_001080409.3	213	-56.02	2	26	5196	5222	24	0.875	1	||||||||||	|||||||:||
1727	uaGGUGGGCGGAGUCGGAGGGUUUCAu	||:||:||||||| ||||||||||	atCCGCCTGCCTCAGACTCCCAAAGTg	>hsa_piR_022437|gb|DQ600690|Homo	NM_001080435.3	209	-52.07	2	26	2971	2997	24	0.875	0.9583	||||||||||	|:|||||||
1728	uaGGUGGGCGGAGUCGGAGGGUUUCAu	|||||| |||||||||||||||||	atCCACCCACCTCAGCCTCCCAAAGTg	>hsa_piR_022437|gb|DQ600690|Homo	NM_001080436.2	217	-55.99	2	26	3436	3462	24	0.9583	0.9583	||||||||||	|| |||||||
1729	uaGGUGGGCGGAGUCGGAGGGUUUCAu	|::|||||||||||||||||||||	atCTGCCCGCCTCAGCCTCCCAAAGTg	>hsa_piR_022437|gb|DQ600690|Homo	NM_001080448.3	217	-56.67	2	26	9049	9075	24	0.9167	1	||||||||||	||||||||||
1730	uaGGUGGGCGGAGUCGGAGGGUUUCAu	||| |||||||:||||||||||||	atCCAACCGCCTCGGCCTCCCAAAGTg	>hsa_piR_022437|gb|DQ600690|Homo	NM_001080448.3	213	-54.31	2	26	9664	9690	24	0.9167	0.9583	||||||||||	|||||||:||
1731	uaGGUGGGCGGAGUCGGAGGGUUUCAu	|||||:|||||:||||||||||||	atCCACCTGCCTCGGCCTCCCAAAGTg	>hsa_piR_022437|gb|DQ600690|Homo	NM_001080472.4	217	-58.38	2	26	1867	1893	24	0.9167	1	||||||||||	|:|||||:||
1732	uaGGUGGGCGGAGUCGGAGGGUUUCAu	||:||||||||:||||||||||||	atCCGCCCGCCTCGGCCTCCCAAAGTg	>hsa_piR_022437|gb|DQ600690|Homo	NM_001080480.3	217	-60.71	2	26	2115	2141	24	0.9167	1	||||||||||	|||||||:||
1733	uaggUGGGC-GGAGUCGGAGGGUUUCAu	|:||| || ||||||||||||||	ggtgATCCGCCCACAGCCTCCCAAAGTg	>hsa_piR_022437|gb|DQ600690|Homo	NM_001080537.2	194	-44.81	2	24	1353	1380	23	0.8696	0.913	||||||||||	|| || ||||
1734	uaGGUGGGCGGAGUCGGAGGGUUUCAu	|::||:||||||||||||||||||	atCTGCCTGCCTCAGCCTCCCAAAGTg	>hsa_piR_022437|gb|DQ600690|Homo	NM_001080825.2	213	-53.87	2	26	2651	2677	24	0.875	1	||||||||||	|:||||||||
1735	uaGGUGGGCGGAGUCGGAGGGUUUCAu	:|:||||||||:||||||||||||	atTCGCCCGCCTCGGCCTCCCAAAGTg	>hsa_piR_022437|gb|DQ600690|Homo	NM_001080825.2	213	-57.88	2	26	5739	5765	24	0.875	1	||||||||||	|||||||:||
1736	uaGGUGGGCGGAGUCGGAGGGUUUCAu	||:|||||||||||||||||||||	atCCGCCCGCCTCAGCCTCCCAAAGTg	>hsa_piR_022437|gb|DQ600690|Homo	NM_001081442.3	221	-61.36	2	26	2831	2857	24	0.9583	1	||||||||||	||||||||||
1737	uaGGUGGGCGGAGUCGGAGGGUUUCAu	||:|||||||||||||||||||||	atCCGCCCGCCTCAGCCTCCCAAAGTg	>hsa_piR_022437|gb|DQ600690|Homo	NM_001081443.3	221	-61.36	2	26	2531	2557	24	0.9583	1	||||||||||	||||||||||
1738	uaGGUGGGCGGAG-UCGGAGGGUUUCAu	||| ||: | || ||||||||||	aaCCAGAAGCTGCAAGGCTCCCAAAGTt	>hsa_piR_022437|gb|DQ600690|Homo	NM_001081976.2	172	-30.8	2	26	630	657	25	0.72	0.76	||||||||||	||: | ||
1739	uaGGUGGGCGGAGUCGGAGGGUUUCAu	|::|||||||||||||||||||||	aaCTGCCCGCCTCAGCCTCCCAAAGTg	>hsa_piR_022437|gb|DQ600690|Homo	NM_001083535.3	217	-55.54	2	26	10120	10146	24	0.9167	1	||||||||||	||||||||||
1740	uaGGUGGGCGGAGUCGGAGGGUUUCAu	||:||| |||||||||||||||||	atCCGCCCACCTCAGCCTCCCAAAGTg	>hsa_piR_022437|gb|DQ600690|Homo	NM_001083535.3	213	-55.52	2	26	5258	5284	24	0.9167	0.9583	||||||||||	|| |||||||
1741	uaGGUGGGCGGAGUCGGAGGGUUUCAu	||||||||||::||||||||||||	atCCACCCGCCTTGGCCTCCCAAAGTg	>hsa_piR_022437|gb|DQ600690|Homo	NM_001083608.2	217	-56.9	2	26	1745	1771	24	0.9167	1	||||||||||	||||||::||
1742	uaGGUGGGCGGAGUCGGAGGGUUUCAu	:| ||| ||| :||||||||||||	gtTCTCCCACCTGGGCCTCCCAAAGTg	>hsa_piR_022437|gb|DQ600690|Homo	NM_001083621.1	193	-43.2	2	26	6610	6636	24	0.7917	0.875	||||||||||	|| ||| :||
1743	uaGGUGGGCGGAGUCGGAGGGUUUCAu	|| ||| ||| : |||||||||||	atCCTCCCACCT-GTCCTCCCAAAGTg	>hsa_piR_022437|gb|DQ600690|Homo	NM_001083956.1	183	-39.13	2	26	2872	2897	24	0.7917	0.8333	||||||||||	|| ||| : |
1744	uaGGUGGGCGGAGUCGGAGGGUUUCAu	|| ||| ||| : |||||||||||	atCCTCCCACCT-GTCCTCCCAAAGTg	>hsa_piR_022437|gb|DQ600690|Homo	NM_001085368.1	183	-39.13	2	26	2699	2724	24	0.7917	0.8333	||||||||||	|| ||| : |
1745	uaGGUGGGCGGAGUCGGAGGGUUUCAu	:||||||:||||||||||||||||	gtTCACCCGTCTCAGCCTCCCAAAGTg	>hsa_piR_022437|gb|DQ600690|Homo	NM_001085372.3	217	-56.4	2	26	1287	1313	24	0.9167	1	||||||||||	|||:||||||
1746	uaGGUGGGCGGAGUCGGAGGGUUUCAu	|||||| ||||:||||||||||||	atCCACCCACCTCGGCCTCCCAAAGTg	>hsa_piR_022437|gb|DQ600690|Homo	NM_001085377.2	213	-55.34	2	26	4995	5021	24	0.9167	0.9583	||||||||||	|| ||||:||
1747	uaGGUGGGCGGAGUCGGAGGGUUUCAu	|||||| |||::||||||||||||	atCCACCCACCTTGGCCTCCCAAAGTg	>hsa_piR_022437|gb|DQ600690|Homo	NM_001085384.3	209	-51.06	2	26	3431	3457	24	0.875	0.9583	||||||||||	|| |||::||
1748	uaGGUGGGCGGAGUCGGAGGGUUUCAu	|||||||||||:||||||||||||	atCCACCCGCCTCGGCCTCCCAAAGTt	>hsa_piR_022437|gb|DQ600690|Homo	NM_001085400.2	221	-59.77	2	26	2297	2323	24	0.9583	1	||||||||||	|||||||:||
1749	uaGGUGGGCGGAGUCGGAGGGUUUCAu	|:|||||||||:||||||||||||	atCTACCCGCCTCGGCCTCCCAAAGTg	>hsa_piR_022437|gb|DQ600690|Homo	NM_001085400.2	217	-58.47	2	26	1837	1863	24	0.9167	1	||||||||||	|||||||:||
1750	uaGGUGGGCGGAGUCGGAGGGUUUCAu	|::||:|||||:||||||||||||	atCTGCCTGCCTCGGCCTCCCAAAGTg	>hsa_piR_022437|gb|DQ600690|Homo	NM_001085423.2	209	-53.22	2	26	1333	1359	24	0.8333	1	||||||||||	|:|||||:||
1751	uaGGUGGGCGGAGUCGGAGGGUUUCAu	||||||||||||||||||||||||	atCCACCCGCCTCAGCCTCCCAAAGTg	>hsa_piR_022437|gb|DQ600690|Homo	NM_001085425.3	225	-61.83	2	26	3266	3292	24	1	1	||||||||||	||||||||||
1752	uaGGUGGGCGGAGUCGGAGGGUUUCAu	||||||||||||||||||||||||	atCCACCCGCCTCAGCCTCCCAAAGTg	>hsa_piR_022437|gb|DQ600690|Homo	NM_001085426.3	225	-61.83	2	26	3218	3244	24	1	1	||||||||||	||||||||||
1753	uaGGUGGGCGGAGUCGGAGGGUUUCAu	||||||||||||||||||||||||	atCCACCCGCCTCAGCCTCCCAAAGTg	>hsa_piR_022437|gb|DQ600690|Homo	NM_001085427.3	225	-61.83	2	26	3173	3199	24	1	1	||||||||||	||||||||||
1754	uaGGUGGGCGGAGUCGGAGGGUUUCAu	||||||||||||||||||||||||	atCCACCCGCCTCAGCCTCCCAAAGTg	>hsa_piR_022437|gb|DQ600690|Homo	NM_001085428.3	225	-61.83	2	26	2981	3007	24	1	1	||||||||||	||||||||||
1755	uaGGUGGGCGGAGUCGGAGGGUUUCAu	|||||| |||::||||||||||||	atCCACCCACCTTGGCCTCCCAAAGTg	>hsa_piR_022437|gb|DQ600690|Homo	NM_001093.4	209	-51.06	2	26	8262	8288	24	0.875	0.9583	||||||||||	|| |||::||
1756	uaGGUGGGCGGAGUCGGAGGGUUUCAu	||:||: ||||:||||||||||||	atCCGCCTTCCTCGGCCTCCCAAAGTg	>hsa_piR_022437|gb|DQ600690|Homo	NM_001097638.3	205	-51.54	2	26	2503	2529	24	0.8333	0.9583	||||||||||	|: ||||:||
1757	uaGGUGGGCGGAGUCGGAGGGUUUCAu	|| ||:||||::||||||||||||	atCCTCCTGCCTTGGCCTCCCAAAGTg	>hsa_piR_022437|gb|DQ600690|Homo	NM_001098175.2	205	-49.71	2	26	5882	5908	24	0.8333	0.9583	||||||||||	|:||||::||
1758	uaGGUGGGCGGAGUCGGAGGGUUUCAu	|| ::|||||:| ||||||||||	atCCTATTGCCTCGGGCTCCCAAAGTg	>hsa_piR_022437|gb|DQ600690|Homo	NM_001098175.2	189	-43.07	2	26	4853	4879	24	0.75	0.875	||||||||||	::|||||:|
1759	uaGGUGGGCGGAGUCGGAGGGUUUCAu	|||||| ||||:|:||||||||||	atCCACCCACCTCGGTCTCCCAAAGTg	>hsa_piR_022437|gb|DQ600690|Homo	NM_001098414.3	209	-53.05	2	26	4694	4720	24	0.875	0.9583	||||||||||	|| ||||:|:
1760	uaGGUGGGCGGAGUCGGAGGGUUUCAu	:::||:|||||:||||||||||||	atTTGCCTGCCTCGGCCTCCCAAAGTg	>hsa_piR_022437|gb|DQ600690|Homo	NM_001098477.2	205	-50.69	2	26	5505	5531	24	0.7917	1	||||||||||	|:|||||:||
1761	uaGGUGGGCGGAGUCGGAGGGUUUCAu	|| ||| ||||:||||||||||||	gtCCTCCCTCCTCGGCCTCCCAAAGTt	>hsa_piR_022437|gb|DQ600690|Homo	NM_001098482.2	205	-48.84	2	26	5362	5388	24	0.875	0.9167	||||||||||	|| ||||:||
1762	uaGGU-GGGCGGAGUCGGAGGGUUUCAu	:|| ||:||||||||||||||||||	gaTCATCCTGCCTCAGCCTCCCAAAGTg	>hsa_piR_022437|gb|DQ600690|Homo	NM_001098491.2	208	-51.95	2	26	2883	2910	25	0.88	0.96	||||||||||	|:||||||||
1763	uaGGU-GGGCGGAGUCGGAGGGUUUCAu	:|| ||:||||||||||||||||||	gaTCATCCTGCCTCAGCCTCCCAAAGTg	>hsa_piR_022437|gb|DQ600690|Homo	NM_001098492.2	208	-51.95	2	26	2844	2871	25	0.88	0.96	||||||||||	|:||||||||
1764	uaGGU-GGGCGGAGUCGGAGGGUUUCAu	:|| ||:||||||||||||||||||	gaTCATCCTGCCTCAGCCTCCCAAAGTg	>hsa_piR_022437|gb|DQ600690|Homo	NM_001098493.2	208	-51.95	2	26	2841	2868	25	0.88	0.96	||||||||||	|:||||||||
1765	uaGGU-GGGCGGAGUCGGAGGGUUUCAu	:|| ||:||||||||||||||||||	gaTCATCCTGCCTCAGCCTCCCAAAGTg	>hsa_piR_022437|gb|DQ600690|Homo	NM_001098494.2	208	-51.95	2	26	2784	2811	25	0.88	0.96	||||||||||	|:||||||||
1766	uaGGU-GGGCGGAGUCGGAGGGUUUCAu	:|| ||:||||||||||||||||||	gaTCATCCTGCCTCAGCCTCCCAAAGTg	>hsa_piR_022437|gb|DQ600690|Homo	NM_001098495.2	208	-51.95	2	26	2745	2772	25	0.88	0.96	||||||||||	|:||||||||
1767	uaGGU-GGGCGGAGUCGGAGGGUUUCAu	:|| ||:||||||||||||||||||	gaTCATCCTGCCTCAGCCTCCCAAAGTg	>hsa_piR_022437|gb|DQ600690|Homo	NM_001098496.2	208	-51.95	2	26	2742	2769	25	0.88	0.96	||||||||||	|:||||||||
1768	uaGGUGGGCGGAGUCGGAGGGUUUCAu	|| ||:|||||:||||||||||||	atCCCCCTGCCTCGGCCTCCCAAAGTg	>hsa_piR_022437|gb|DQ600690|Homo	NM_001098507.2	209	-53.22	2	26	6311	6337	24	0.875	0.9583	||||||||||	|:|||||:||
1769	uaGGUGGGCGGAGUCGGAGGGUUUCAu	||| |:|| |::||||||||||||	atCCA-CTGCATTGGCCTCCCAAAGTg	>hsa_piR_022437|gb|DQ600690|Homo	NM_001098612.2	191	-39.66	2	26	1806	1831	24	0.7917	0.9167	||||||||||	|:|| |::||
1770	uaggUGGGCGGAGUCGGAGGGUUUCAu	|: | |||||||||||||||||	agtgATACACCTCAGCCTCCCAAAGTa	>hsa_piR_022437|gb|DQ600690|Homo	NM_001098621.4	195	-40.62	2	24	2104	2130	22	0.8636	0.9091	||||||||||	| |||||||
1771	uaGGUGGGCGGAGUCGGAGGGUUUCAu	||:|||||||::||||||||||||	atCCGCCCGCCTTGGCCTCCCAAAGTg	>hsa_piR_022437|gb|DQ600690|Homo	NM_001098721.1	213	-56.43	2	26	3694	3720	24	0.875	1	||||||||||	||||||::||
1772	uaGGUGGGCGGAGUCGGAGGGUUUCAu	|::||| |||::||||||||||||	atCTGCCCACCTTGGCCTCCCAAAGTg	>hsa_piR_022437|gb|DQ600690|Homo	NM_001098721.1	201	-45.9	2	26	2085	2111	24	0.7917	0.9583	||||||||||	|| |||::||
1773	uaGGUGGGCGGAGUCGGAGGGUUUCAu	||:|||||||::||||||||||||	atCCGCCCGCCTTGGCCTCCCAAAGTg	>hsa_piR_022437|gb|DQ600690|Homo	NM_001098722.2	213	-56.43	2	26	3611	3637	24	0.875	1	||||||||||	||||||::||
1774	uaGGUGGGCGGAGUCGGAGGGUUUCAu	|::||| |||::||||||||||||	atCTGCCCACCTTGGCCTCCCAAAGTg	>hsa_piR_022437|gb|DQ600690|Homo	NM_001098722.2	201	-45.9	2	26	2002	2028	24	0.7917	0.9583	||||||||||	|| |||::||
1775	uaGGUGGGCGGAGUCGGAGGGUUUCAu	|||||||||||:||||||||||||	atCCACCCGCCTCGGCCTCCCAAAGTg	>hsa_piR_022437|gb|DQ600690|Homo	NM_001098814.2	221	-61.18	2	26	2197	2223	24	0.9583	1	||||||||||	|||||||:||
1776	uaGGUGGGCGGAGUCGGAGGGUUUCAu	||||||||||::|:||||||||||	atCCACCCGCCTTGGTCTCCCAAAGTg	>hsa_piR_022437|gb|DQ600690|Homo	NM_001098831.1	213	-54.61	2	26	1385	1411	24	0.875	1	||||||||||	||||||::|:
1777	uaGGUGGGCGGAGUCGGAGGGUUUCAu	|| :|| |||::||||||||||||	gtCCTTCCACCTTGGCCTCCCAAAGTg	>hsa_piR_022437|gb|DQ600690|Homo	NM_001099455.2	197	-43.83	2	26	4625	4651	24	0.7917	0.9167	||||||||||	|| |||::||
1778	uaGGUGGGCGGAGUCGGAGGGUUUCAu	|||||:|||||:||||||||||||	atCCACCTGCCTCGGCCTCCCAAAGTg	>hsa_piR_022437|gb|DQ600690|Homo	NM_001099668.1	217	-58.38	2	26	1992	2018	24	0.9167	1	||||||||||	|:|||||:||
1779	uaGGUGGGCGGAGUCGGAGGGUUUCAu	|:|:|:||||||||||||||||||	atCTATCTGCCTCAGCCTCCCAAAGTg	>hsa_piR_022437|gb|DQ600690|Homo	NM_001099668.1	213	-53.97	2	26	2448	2474	24	0.875	1	||||||||||	|:||||||||
1780	uaGGUGGGCGGAGUCGGAGGGUUUCAu	|||||:|||||:||||||||||||	atCCACCTGCCTCGGCCTCCCAAAGTg	>hsa_piR_022437|gb|DQ600690|Homo	NM_001099669.1	217	-58.38	2	26	1845	1871	24	0.9167	1	||||||||||	|:|||||:||
1781	uaGGUGGGCGGAGUCGGAGGGUUUCAu	|:|:|:||||||||||||||||||	atCTATCTGCCTCAGCCTCCCAAAGTg	>hsa_piR_022437|gb|DQ600690|Homo	NM_001099669.1	213	-53.97	2	26	2301	2327	24	0.875	1	||||||||||	|:||||||||
1782	uaGGUGGGCGGAGUCGGAGGGUUUCAu	|| ||| |||||||||||||||||	gtCCTCCCACCTCAGCCTCCCAAAGTg	>hsa_piR_022437|gb|DQ600690|Homo	NM_001099684.2	209	-51.29	2	26	198	224	24	0.9167	0.9167	||||||||||	|| |||||||
1783	uaGGUGGGCGGAGUCGGAGGGUUUCAu	||:||| |||||||||||||||||	atCCGCCCACCTCAGCCTCCCAAAGTg	>hsa_piR_022437|gb|DQ600690|Homo	NM_001099694.2	213	-55.52	2	26	3147	3173	24	0.9167	0.9583	||||||||||	|| |||||||
1784	uaGGUGGGCGGAGUCGGAGGGUUUCAu	||||||||||::||||||||||||	atCCACCCGCCTTGGCCTCCCAAAGTg	>hsa_piR_022437|gb|DQ600690|Homo	NM_001100389.2	217	-56.9	2	26	8228	8254	24	0.9167	1	||||||||||	||||||::||
1785	uaGGUGGGCGGAGUCGGAGGGUUUCAu	||:||| |||::||||||||||||	atCCGCCCTCCTTGGCCTCCCAAAGTg	>hsa_piR_022437|gb|DQ600690|Homo	NM_001100389.2	205	-50.2	2	26	3036	3062	24	0.8333	0.9583	||||||||||	|| |||::||
1786	uaGGUGGGCGGAGUCGGAGGGUUUCAu	|| ||| |||::||||||||||||	atCCTCCCTCCTTGGCCTCCCAAAGTa	>hsa_piR_022437|gb|DQ600690|Homo	NM_001100389.2	201	-46.38	2	26	8540	8566	24	0.8333	0.9167	||||||||||	|| |||::||
1787	uaGGUGGGCGGAGUCGGAGGGUUUCAu	|||||| ||||:||||||||||||	atCCACCCCCCTCGGCCTCCCAAAGTg	>hsa_piR_022437|gb|DQ600690|Homo	NM_001100422.1	213	-54.47	2	26	5977	6003	24	0.9167	0.9583	||||||||||	|| ||||:||
1788	uaGGUGGGCGGAGUCGGAGGGUUUCAu	|: ||:||:|::||||||||||||	atCTTCCTGCTTTGGCCTCCCAAAGTg	>hsa_piR_022437|gb|DQ600690|Homo	NM_001100422.1	197	-43.54	2	26	4668	4694	24	0.75	0.9583	||||||||||	|:||:|::||
1789	uaGGUGGGCGGAGUCGGAGGGUUUCAu	|||||| ||||:||||||||||||	atCCACCCCCCTCGGCCTCCCAAAGTg	>hsa_piR_022437|gb|DQ600690|Homo	NM_001100423.2	213	-54.47	2	26	5867	5893	24	0.9167	0.9583	||||||||||	|| ||||:||
1790	uaGGUGGGCGGAGUCGGAGGGUUUCAu	|: ||:||:|::||||||||||||	atCTTCCTGCTTTGGCCTCCCAAAGTg	>hsa_piR_022437|gb|DQ600690|Homo	NM_001100423.2	197	-43.54	2	26	4558	4584	24	0.75	0.9583	||||||||||	|:||:|::||
1791	uaGGUGGGCGGAGUCGGAGGGUUUCAu	|||||| ||||:||||||||||||	atCCACCCCCCTCGGCCTCCCAAAGTg	>hsa_piR_022437|gb|DQ600690|Homo	NM_001100424.1	213	-54.47	2	26	5770	5796	24	0.9167	0.9583	||||||||||	|| ||||:||
1792	uaGGUGGGCGGAGUCGGAGGGUUUCAu	|: ||:||:|::||||||||||||	atCTTCCTGCTTTGGCCTCCCAAAGTg	>hsa_piR_022437|gb|DQ600690|Homo	NM_001100424.1	197	-43.54	2	26	4461	4487	24	0.75	0.9583	||||||||||	|:||:|::||
1793	uaGGUGGGCGGAGUCGGAGGGUUUCAu	|||||| ||||:||||||||||||	atCCACCCACCTCGGCCTCCCAAAGTg	>hsa_piR_022437|gb|DQ600690|Homo	NM_001100595.2	213	-55.34	2	26	2093	2119	24	0.9167	0.9583	||||||||||	|| ||||:||
1794	uaGGUGGGCGGAGUCGGAGGGUUUCAu	|::||||||||:||||||||||||	atCTGCCCGCCTCGGCCTCCCAAAGTg	>hsa_piR_022437|gb|DQ600690|Homo	NM_001100607.3	213	-56.02	2	26	4215	4241	24	0.875	1	||||||||||	|||||||:||
1795	uaGGUGGGCGGAGUCGGAGGGUUUCAu	|||||| |||::||||||||||||	atCCACCCACCTTGGCCTCCCAAAGTg	>hsa_piR_022437|gb|DQ600690|Homo	NM_001100829.3	209	-51.06	2	26	5619	5645	24	0.875	0.9583	||||||||||	|| |||::||
1796	uaGGUGGGCGGAGUCGGAGGGUUUCAu	|||||| | |||||||||||||||	atCCACCCACGTCAGCCTCCCAAAGTg	>hsa_piR_022437|gb|DQ600690|Homo	NM_001100912.2	209	-50.82	2	26	103	129	24	0.9167	0.9167	||||||||||	|| | |||||
1797	uaGGUGGGCGGAGUCGGAGGGUUUCAu	|||||||||||:||||||||||||	atCCACCCGCCTCGGCCTCCCAAAGTg	>hsa_piR_022437|gb|DQ600690|Homo	NM_001100913.3	221	-61.18	2	26	4956	4982	24	0.9583	1	||||||||||	|||||||:||
1798	uaGGUGGGCGGAGUCGGAGGGUUUCAu	||:|||||||::||||||||||||	atCCGCCCGCCTTGGCCTCCCAAAGTg	>hsa_piR_022437|gb|DQ600690|Homo	NM_001102396.2	213	-56.43	2	26	4808	4834	24	0.875	1	||||||||||	||||||::||
1799	uaGGUGGGCGGAGUCGGAGGGUUUCAu	|::||||||||:||||||||||||	agCTGCCCGCCTCGGCCTCCCAAAGTg	>hsa_piR_022437|gb|DQ600690|Homo	NM_001102420.3	213	-54.88	2	26	3800	3826	24	0.875	1	||||||||||	|||||||:||
1800	uaGGUGGGCGGAGUCGGAGGGUUUCAu	|::||||||||:||||||||||||	agCTGCCCGCCTCGGCCTCCCAAAGTg	>hsa_piR_022437|gb|DQ600690|Homo	NM_001102421.3	213	-54.88	2	26	3663	3689	24	0.875	1	||||||||||	|||||||:||
1801	uaGGUGGGCGGAGUCGGAGGGUUUCAu	|::||||||||: |||||||||||	atCTGCCCGCCTCGCCCTCCCAAAGTg	>hsa_piR_022437|gb|DQ600690|Homo	NM_001102601.3	205	-50.72	2	26	1226	1252	24	0.8333	0.9583	||||||||||	|||||||: |
1802	uaGGUGGGCGGAGUCGGAGGGUUUCAu	||||| |:|::||||||||||||	atCCACCAACTTTGGCCTCCCAAAGTg	>hsa_piR_022437|gb|DQ600690|Homo	NM_001102601.3	197	-44.48	2	26	1727	1753	24	0.7917	0.9167	||||||||||	| |:|::||
1803	uaGGUGGGCGGAGUCGGAGGGUUUCAu	|||||| |||::||||||||||||	atCCACCCACCTTGGCCTCCCAAAGTg	>hsa_piR_022437|gb|DQ600690|Homo	NM_001102651.2	209	-51.06	2	26	3045	3071	24	0.875	0.9583	||||||||||	|| |||::||
1804	uaGGUGGGCGGAGUCGGAGGGUUUCAu	|| ||:|:||::||||||||||||	atCCTCCTGTCTTGGCCTCCCAAAGTg	>hsa_piR_022437|gb|DQ600690|Homo	NM_001102651.2	201	-47.42	2	26	2516	2542	24	0.7917	0.9583	||||||||||	|:|:||::||
1805	uaGGUGGGCGGAGUCGGAGGGUUUCAu	|::||:|||||:||||||||||||	atCTGCCTGCCTCGGCCTCCCAAAGTg	>hsa_piR_022437|gb|DQ600690|Homo	NM_001102657.3	209	-53.22	2	26	3744	3770	24	0.8333	1	||||||||||	|:|||||:||
1806	uaGGUGGGCGGAGUCGGAGGGUUUCAu	::::|:||||||| ||||||||||	atTTGTCTGCCTCAGGCTCCCAAAGTg	>hsa_piR_022437|gb|DQ600690|Homo	NM_001104554.1	197	-45.01	2	26	5207	5233	24	0.75	0.9583	||||||||||	|:|||||||
1807	uaGGUGGGCGGAGUCGGAGGGUUUCAu	|| ||| ||||:||||||||||||	atCCTCCCACCTCGGCCTCCCAAAGTt	>hsa_piR_022437|gb|DQ600690|Homo	NM_001104558.1	205	-49.54	2	26	2888	2914	24	0.875	0.9167	||||||||||	|| ||||:||
1808	uaGGUGGGCGGAGUCGGAGGGUUUCAu	||||||||||::||||||||||||	atCCACCCGCCTTGGCCTCCCAAAGTg	>hsa_piR_022437|gb|DQ600690|Homo	NM_001104595.2	217	-56.9	2	26	2567	2593	24	0.9167	1	||||||||||	||||||::||
1809	uaGGUGGGCGGAGUCGGAGGGUUUCAu	|||||||||||:||||||||||||	atCCACCCGCCTCGGCCTCCCAAAGTg	>hsa_piR_022437|gb|DQ600690|Homo	NM_001105250.3	221	-61.18	2	26	5318	5344	24	0.9583	1	||||||||||	|||||||:||
1810	uaGGUGGGCGGAGUCGGAGGGUUUCAu	|::||:||:||:||||||||||||	atCTGCCTGCTTCGGCCTCCCAAAGTg	>hsa_piR_022437|gb|DQ600690|Homo	NM_001105251.4	205	-50.28	2	26	10608	10634	24	0.7917	1	||||||||||	|:||:||:||
1811	uaGGUGGGCGGAGUCGGAGGGUUUCAu	|::||:|||| :||||||||||||	atCTGCCTGCCTGGGCCTCCCAAAGTg	>hsa_piR_022437|gb|DQ600690|Homo	NM_001105251.4	201	-48.61	2	26	9560	9586	24	0.7917	0.9583	||||||||||	|:|||| :||
1812	uaGGUGGGCGGAGUCGGAGGGUUUCAu	|::|||||||::||||||||||||	atCTGCCCGCCTTGGCCTCCCAAAGTg	>hsa_piR_022437|gb|DQ600690|Homo	NM_001105570.1	209	-51.74	2	26	1801	1827	24	0.8333	1	||||||||||	||||||::||
1813	uagGUGGGCGGAGUCGGAGGGUUUCAu	|:|||||||::||||||||||||	ataCGCCCGCCTTGGCCTCCCAAAGTg	>hsa_piR_022437|gb|DQ600690|Homo	NM_001105570.1	208	-51.65	2	25	1487	1513	23	0.8696	1	||||||||||	||||||::||
1814	uaGGUGGGCGGAGUCGGAGGGUUUCAu	|||||| |||||||||||||||||	atCCACCCACCTCAGCCTCCCAAAGTg	>hsa_piR_022437|gb|DQ600690|Homo	NM_001105573.2	217	-55.99	2	26	5037	5063	24	0.9583	0.9583	||||||||||	|| |||||||
1815	uaGGUGGGCGGAGUCGGAGGGUUUCAu	|||||| |||| ||||||||||||	caCCACCCACCTC-GCCTCCCAAAGTg	>hsa_piR_022437|gb|DQ600690|Homo	NM_001105573.2	203	-49.78	2	26	5168	5193	24	0.9167	0.9167	||||||||||	|| |||| ||
1816	uaGGUGGGCGGAGUCGGAGGGUUUCAu	||:||||||||:||||||||||||	atCCGCCCGCCTCGGCCTCCCAAAGTg	>hsa_piR_022437|gb|DQ600690|Homo	NM_001105574.2	217	-60.71	2	26	1811	1837	24	0.9167	1	||||||||||	|||||||:||
1817	uaGGUGGGCGGAGUCGGAGGGUUUCAu	||:||||||||:||||||||||||	atCCGCCCGCCTCGGCCTCCCAAAGTg	>hsa_piR_022437|gb|DQ600690|Homo	NM_001109689.4	217	-60.71	2	26	3448	3474	24	0.9167	1	||||||||||	|||||||:||
1818	uaGGUGGGCGGAGUCGGAGGGUUUCAu	|||||| ||||| |||||||||||	atCCACCCACCTCAACCTCCCAAAGTg	>hsa_piR_022437|gb|DQ600690|Homo	NM_001109754.4	209	-49.72	2	26	9960	9986	24	0.9167	0.9167	||||||||||	|| ||||| |
1819	uaGGUGGGCGGAGU-C--GGAGGGUUUCAu	|:|: |:|||| | |||||||||||	aaCTATGGGTCTCATGTACCTCCCAAAGTc	>hsa_piR_022437|gb|DQ600690|Homo	NM_001110.4	175	-32.08	2	26	1272	1301	27	0.7037	0.8148	||||||||||	:|||| | |
1820	uaGGUGGGCGGAGUCGGAGGGUUUCAu	||:||||||||:||||||||||||	atCCGCCCGCCTCGGCCTCCCAAAGTg	>hsa_piR_022437|gb|DQ600690|Homo	NM_001111298.2	217	-60.71	2	26	3354	3380	24	0.9167	1	||||||||||	|||||||:||
1821	uaGGUGGGCGGAGUCGGAGGGUUUCAu	||:||| |||::||||||||||||	atCCGCCCACCTTGGCCTCCCAAAGTg	>hsa_piR_022437|gb|DQ600690|Homo	NM_001112724.2	205	-50.59	2	26	2856	2882	24	0.8333	0.9583	||||||||||	|| |||::||
1822	uaGGUGGGCGGAGUCGGAGGGUUUCAu	|::||:||||||||||||||||||	atCTGCCTGCCTCAGCCTCCCAAAGTg	>hsa_piR_022437|gb|DQ600690|Homo	NM_001112736.2	213	-53.87	2	26	7655	7681	24	0.875	1	||||||||||	|:||||||||
1823	uaGGUGGGCGGAGUCGGAGGGUUUCAu	||||||||||||||||||||||||	atCCACCCGCCTCAGCCTCCCAAAGTg	>hsa_piR_022437|gb|DQ600690|Homo	NM_001114108.2	225	-61.83	2	26	2846	2872	24	1	1	||||||||||	||||||||||
1824	uaGGUGGGCGGAGUCGGAGGGUUUCAu	||:||||||||:||||||||||||	atCCGCCCGCCTCGGCCTCCCAAAGTg	>hsa_piR_022437|gb|DQ600690|Homo	NM_001114118.3	217	-60.71	2	26	11076	11102	24	0.9167	1	||||||||||	|||||||:||
1825	uaGGUGGGCGGAGUCGGAGGGUUUCAu	|| ||:||||:: |||||||||||	atCCTCCTGCCTTGACCTCCCAAAGTg	>hsa_piR_022437|gb|DQ600690|Homo	NM_001114118.3	197	-45.69	2	26	5868	5894	24	0.7917	0.9167	||||||||||	|:||||:: |
1826	uaGGUGGGCGGAGUCGGAGGGUUUCAu	|::||| |||| |||||||||||	atCTGCCCACCTCTTCCTCCCAAAGTt	>hsa_piR_022437|gb|DQ600690|Homo	NM_001114118.3	193	-41.73	2	26	5446	5472	24	0.7917	0.875	||||||||||	|| |||| |
1827	uaGGUGGGCGGAGUCGGAGGGUUUCAu	|||||:||||::||||||||||||	atCCACCTGCCTTGGCCTCCCAAAGTg	>hsa_piR_022437|gb|DQ600690|Homo	NM_001114121.2	213	-54.1	2	26	2575	2601	24	0.875	1	||||||||||	|:||||::||
1828	uaGGUGGGCGGAGUCGGAGGGUUUCAu	:||||||||||:||||||||||||	gaTCACCCGCCTCGGCCTCCCAAAGTg	>hsa_piR_022437|gb|DQ600690|Homo	NM_001114182.2	217	-57.36	2	26	3577	3603	24	0.9167	1	||||||||||	|||||||:||
1829	uaGGUGGGCGGAGUCGGAGGGUUUCAu	:|:||||||||:||||||||||||	atTCGCCCGCCTCGGCCTCCCAAAGTg	>hsa_piR_022437|gb|DQ600690|Homo	NM_001115007.3	213	-57.88	2	26	2945	2971	24	0.875	1	||||||||||	|||||||:||
1830	uaGGUGGGCGGAGUCGGAGGGUUUCAu	:|:||||||||:||||||||||||	atTCGCCCGCCTCGGCCTCCCAAAGTg	>hsa_piR_022437|gb|DQ600690|Homo	NM_001115008.3	213	-57.88	2	26	3135	3161	24	0.875	1	||||||||||	|||||||:||
1831	uaGGUGGGCGGAGUCGGAGGGUUUCAu	|| |||||:|| ||||||||||||	atCCTCCCGCTTC-GCCTCCCAAAGTg	>hsa_piR_022437|gb|DQ600690|Homo	NM_001115152.2	199	-49.42	2	26	1006	1031	24	0.875	0.9167	||||||||||	||||:|| ||
1832	uaGGUGGGCGGAGUCGGAGGGUUUCAu	|::|: ||||||||||||||||||	atCTGCTGGCCTCAGCCTCCCAAAGTt	>hsa_piR_022437|gb|DQ600690|Homo	NM_001122681.2	205	-47.19	2	26	7319	7345	24	0.8333	0.9583	||||||||||	: ||||||||
1833	uaGGUGGGCGGAGUCGGAGGGUUUCAu	|::||| |||::||||||||||||	atCTGCCCACCTTGGCCTCCCAAAGTg	>hsa_piR_022437|gb|DQ600690|Homo	NM_001122681.2	201	-45.9	2	26	3775	3801	24	0.7917	0.9583	||||||||||	|| |||::||
1834	uaGGUGGGCGGAGUCGGAGGGUUUCAu	|| ||| :||:: |||||||||||	agCCTCCCATCTTGACCTCCCAAAGTg	>hsa_piR_022437|gb|DQ600690|Homo	NM_001122681.2	189	-39.5	2	26	7713	7739	24	0.75	0.875	||||||||||	|| :||:: |
1835	uaGGUGGGCGGAGUCGGAGGGUUUCAu	|| ||:||:||:||||||||||||	atCCTCCTGCTTCGGCCTCCCAAAGTg	>hsa_piR_022437|gb|DQ600690|Homo	NM_001122770.3	205	-51.05	2	26	8778	8804	24	0.8333	0.9583	||||||||||	|:||:||:||
1836	uaGGUGGGCGGAGUCGGAGGGUUUCAu	|::||:||||||||||||||||||	atCTGCCTGCCTCAGCCTCCCAAAGTg	>hsa_piR_022437|gb|DQ600690|Homo	NM_001122956.2	213	-53.87	2	26	3959	3985	24	0.875	1	||||||||||	|:||||||||
1837	uaGGUGGGCGGAGUCGGAGGGUUUCAu	|| |::||||::||||||||||||	atCCTCTTGCCTTGGCCTCCCAAAGTg	>hsa_piR_022437|gb|DQ600690|Homo	NM_001123226.2	201	-46.98	2	26	4934	4960	24	0.7917	0.9583	||||||||||	::||||::||
1838	uaGGUGGGCGGAGUCGGAGGGUUUCAu	||:||| ||||: |||||||||||	atCCGCCCACCTCGACCTCCCAAAGTg	>hsa_piR_022437|gb|DQ600690|Homo	NM_001123226.2	201	-49.57	2	26	7372	7398	24	0.8333	0.9167	||||||||||	|| ||||: |
1839	uaGGUGGGCGGAGUCGGAGGGUUUCAu	|::|||||| |:||||||||||||	atCTGCCCGCCACGGCCTCCCAAAGTg	>hsa_piR_022437|gb|DQ600690|Homo	NM_001126049.2	205	-50.73	2	26	3728	3754	24	0.8333	0.9583	||||||||||	||||| |:||
1840	uaGGUGGGCGGAGUCGGAGGGUUUCAu	|||||| ||||:|:||||||||||	atCCACCCACCTCGGTCTCCCAAAGTg	>hsa_piR_022437|gb|DQ600690|Homo	NM_001126107.2	209	-53.05	2	26	3862	3888	24	0.875	0.9583	||||||||||	|| ||||:|:
1841	uaGGUGGGCGGAGUCGGAGGGUUUCAu	|||||| ||||:|:||||||||||	atCCACCCACCTCGGTCTCCCAAAGTg	>hsa_piR_022437|gb|DQ600690|Homo	NM_001126108.2	209	-53.05	2	26	3838	3864	24	0.875	0.9583	||||||||||	|| ||||:|:
1842	uaGGUGGGCGGAGUCGGAGGGUUUCAu	||:||:||||||||||||||||||	atCCGCCTGCCTCAGCCTCCCAAAGTg	>hsa_piR_022437|gb|DQ600690|Homo	NM_001126340.3	217	-58.56	2	26	7135	7161	24	0.9167	1	||||||||||	|:||||||||
1843	uaGGUGGGCGGAGUCGGAGGGUUUCAu	|| ||:||||||||||||||||||	atCCTCCTGCCTCAGCCTCCCAAAGTg	>hsa_piR_022437|gb|DQ600690|Homo	NM_001126340.3	213	-54.64	2	26	7890	7916	24	0.9167	0.9583	||||||||||	|:||||||||
1844	uaGGUGGGCGGAGUCGGAGGGUUUCAu	|::||| ||||:||||||||||||	atCTGCCCACCTCGGCCTCCCAAAGTg	>hsa_piR_022437|gb|DQ600690|Homo	NM_001126340.3	205	-50.18	2	26	6290	6316	24	0.8333	0.9583	||||||||||	|| ||||:||
1845	uaGGUGGGCGGAGUCGGAGGGUUUCAu	|| ||:||||::||||||||||||	acCCTCCTGCCTTGGCCTCCCAAAGTg	>hsa_piR_022437|gb|DQ600690|Homo	NM_001126340.3	205	-47.59	2	26	6603	6629	24	0.8333	0.9583	||||||||||	|:||||::||
1846	uaGGUGGGCGGAGUCGGAGGGUUUCAu	|::|:| |||::|:||||||||||	atCTGCTCACCTTGGTCTCCCAAAGTg	>hsa_piR_022437|gb|DQ600690|Homo	NM_001127174.3	193	-40.54	2	26	4286	4312	24	0.7083	0.9583	||||||||||	:| |||::|:
1847	uaGGUGGGCGGAGUCGGAGGGUUUCAu	|::|:| |||::|:||||||||||	atCTGCTCACCTTGGTCTCCCAAAGTg	>hsa_piR_022437|gb|DQ600690|Homo	NM_001127175.3	193	-40.54	2	26	4353	4379	24	0.7083	0.9583	||||||||||	:| |||::|:
1848	uaGGUGGGCGGAGUCGGAGGGUUUCAu	|::|:| |||::|:||||||||||	atCTGCTCACCTTGGTCTCCCAAAGTg	>hsa_piR_022437|gb|DQ600690|Homo	NM_001127176.3	193	-40.54	2	26	4509	4535	24	0.7083	0.9583	||||||||||	:| |||::|:
1849	uaGGUGGGCGGAGUCGGAGGGUUUCAu	:|||| |||||:||||||||||||	atTCACCAGCCTCGGCCTCCCAAAGTg	>hsa_piR_022437|gb|DQ600690|Homo	NM_001127183.4	209	-50.79	2	26	3304	3330	24	0.875	0.9583	||||||||||	| |||||:||
1850	uaGGUGGGCGGAGUCGGAGGGUUUCAu	||:||:||||::||||||||||||	atCCGCCTGCCTTGGCCTCCCAAAGTg	>hsa_piR_022437|gb|DQ600690|Homo	NM_001127183.4	209	-53.63	2	26	11239	11265	24	0.8333	1	||||||||||	|:||||::||
1851	uaGGUGGGCGGAGUCGGAGGGUUUCAu	|| ||| |||| |||||||||||	atCCTCCCACCTCCACCTCCCAAAGTg	>hsa_piR_022437|gb|DQ600690|Homo	NM_001127183.4	193	-43.84	2	26	12415	12441	24	0.8333	0.8333	||||||||||	|| |||| |
1852	uaGGUGGGCGGAGUCGGAGGGUUUCAu	||:|||||||::||||||||||||	atCCGCCCGCCTTGGCCTCCCAAAGTg	>hsa_piR_022437|gb|DQ600690|Homo	NM_001127192.2	213	-56.43	2	26	2253	2279	24	0.875	1	||||||||||	||||||::||
1853	uaGGUGGGCGGAGUCGGAGGGUUUCAu	||:|||||||::||||||||||||	atCCGCCCGCCTTGGCCTCCCAAAGTg	>hsa_piR_022437|gb|DQ600690|Homo	NM_001127193.2	213	-56.43	2	26	2250	2276	24	0.875	1	||||||||||	||||||::||
1854	uaGGUGGGCGGAGUCGGAGGGUUUCAu	||:|||||||::||||||||||||	atCCGCCCGCCTTGGCCTCCCAAAGTg	>hsa_piR_022437|gb|DQ600690|Homo	NM_001127194.2	213	-56.43	2	26	2232	2258	24	0.875	1	||||||||||	||||||::||
1855	uaGGUGGGCGGAGUCGGAGGGUUUCAu	||:|||||||::||||||||||||	atCCGCCCGCCTTGGCCTCCCAAAGTg	>hsa_piR_022437|gb|DQ600690|Homo	NM_001127195.2	213	-56.43	2	26	2229	2255	24	0.875	1	||||||||||	||||||::||
1856	uaGGUGGGCGGAGUCGGAGGGUUUCAu	||:|||||||::||||||||||||	atCCGCCCGCCTTGGCCTCCCAAAGTg	>hsa_piR_022437|gb|DQ600690|Homo	NM_001127196.2	213	-56.43	2	26	2226	2252	24	0.875	1	||||||||||	||||||::||
1857	uaGGUGGGCGGAGUCGGAGGGUUUCAu	|::||||||||:||||||||||||	atCTGCCCGCCTCGGCCTCCCAAAGTg	>hsa_piR_022437|gb|DQ600690|Homo	NM_001127198.5	213	-56.02	2	26	5497	5523	24	0.875	1	||||||||||	|||||||:||
1858	uaGGUGGGCGGAGUCGGAGGGUUUCAu	||:||||||||:| ||||||||||	atCCGCCCGCCTCGGACTCCCAAAGTg	>hsa_piR_022437|gb|DQ600690|Homo	NM_001127198.5	209	-54.22	2	26	5939	5965	24	0.875	0.9583	||||||||||	|||||||:|
1859	uaGGUGGGCGGAGUCGGAGGGUUUCAu	||:|||||||||||||||||||||	atCCGCCCGCCTCAGCCTCCCAAAGTg	>hsa_piR_022437|gb|DQ600690|Homo	NM_001127217.3	221	-61.36	2	26	4128	4154	24	0.9583	1	||||||||||	||||||||||
1860	uaGGUGGGCGGAGUCGGAGGGUUUCAu	|||| :||||||||||||||||||	atCCACGTGCCTCAGCCTCCCAAAGTg	>hsa_piR_022437|gb|DQ600690|Homo	NM_001127321.1	213	-54.83	2	26	8742	8768	24	0.9167	0.9583	||||||||||	:||||||||
1861	uaGGUGGGCGGAGUCGGAGGGUUUCAu	|::||| |||::||||||||||||	atCTGCCCACCTTGGCCTCCCAAAGTg	>hsa_piR_022437|gb|DQ600690|Homo	NM_001127321.1	201	-45.9	2	26	4481	4507	24	0.7917	0.9583	||||||||||	|| |||::||
1862	uaGGUGGGCGGAGUCGGAGGGUUUCAu	|||| :||||||||||||||||||	atCCACGTGCCTCAGCCTCCCAAAGTg	>hsa_piR_022437|gb|DQ600690|Homo	NM_001127322.1	213	-54.83	2	26	8940	8966	24	0.9167	0.9583	||||||||||	:||||||||
1863	uaGGUGGGCGGAGUCGGAGGGUUUCAu	|::||| |||::||||||||||||	atCTGCCCACCTTGGCCTCCCAAAGTg	>hsa_piR_022437|gb|DQ600690|Homo	NM_001127322.1	201	-45.9	2	26	4679	4705	24	0.7917	0.9583	||||||||||	|| |||::||
1864	uaGGUGGGCGGAGUCGGAGGGUUUCAu	|||||| |||::||||||||||||	atCCACCCACCTTGGCCTCCCAAAGTg	>hsa_piR_022437|gb|DQ600690|Homo	NM_001127350.2	209	-51.06	2	26	1087	1113	24	0.875	0.9583	||||||||||	|| |||::||
1865	uaGGUGGGCGGAGUCGGAGGGUUUCAu	|||||: |||||||||||||||||	atCCACCTCCCTCAGCCTCCCAAAGTg	>hsa_piR_022437|gb|DQ600690|Homo	NM_001127482.2	213	-52.66	2	26	2603	2629	24	0.9167	0.9583	||||||||||	|: |||||||
1866	uaGGUGGGCGGAGUCGGAGGGUUUCAu	|||||| |||||||||||||||||	atCCACCCACCTCAGCCTCCCAAAGTg	>hsa_piR_022437|gb|DQ600690|Homo	NM_001127500.3	217	-55.99	2	26	5357	5383	24	0.9583	0.9583	||||||||||	|| |||||||
1867	uaGGUGGGCGGAGUCGGAGGGUUUCAu	||||::|||||:|:||||||||||	atCCACTTGCCTCGGTCTCCCAAAGTg	>hsa_piR_022437|gb|DQ600690|Homo	NM_001127649.3	209	-53.36	2	26	10732	10758	24	0.8333	1	||||||||||	::|||||:|:
1868	uaGGUGGGCGGAGUCGGAGGGUUUCAu	|::||| |||||||||||||||||	atCTGCCCTCCTCAGCCTCCCAAAGTg	>hsa_piR_022437|gb|DQ600690|Homo	NM_001127649.3	209	-50.44	2	26	13544	13570	24	0.875	0.9583	||||||||||	|| |||||||
1869	uaGGUGGGCGGAGUCGGAGGGUUUCAu	|||||| ||| :||||||||||||	atCCACCCACCTAGGCCTCCCAAAGTg	>hsa_piR_022437|gb|DQ600690|Homo	NM_001127649.3	205	-49.03	2	26	3171	3197	24	0.875	0.9167	||||||||||	|| ||| :||
1870	uaGGUGGGCGGAGUCGGAGGGUUUCAu	|::||| ||||:||||||||||||	atCTGCCCACCTCGGCCTCCCAAAGTg	>hsa_piR_022437|gb|DQ600690|Homo	NM_001127649.3	205	-50.18	2	26	9887	9913	24	0.8333	0.9583	||||||||||	|| ||||:||
1871	uaGGUGGGCGGAGUCGGAGGGUUUCAu	|::| :|||||| |||||||||||	atCTGCATGCCTCA-CCTCCCAAAGTg	>hsa_piR_022437|gb|DQ600690|Homo	NM_001127649.3	191	-41.47	2	26	9292	9317	24	0.7917	0.9167	||||||||||	:|||||| |
1872	uaGGUGGGCGGAGUCGGAGGGUUUCAu	|| ||| :||:: |||||||||||	atCCTCCCATCTTGACCTCCCAAAGTg	>hsa_piR_022437|gb|DQ600690|Homo	NM_001127649.3	189	-40.64	2	26	11010	11036	24	0.75	0.875	||||||||||	|| :||:: |
1873	uaGGUGGGCGGAGUCGGAGGGUUUCAu	|::||||||||:||||||||||||	atCTGCCCGCCTCGGCCTCCCAAAGTg	>hsa_piR_022437|gb|DQ600690|Homo	NM_001127691.3	213	-56.02	2	26	1563	1589	24	0.875	1	||||||||||	|||||||:||
1874	uaGGUGGGCGGAGUCGGAGGGUUUCAu	| :||:|||||:||||||||||||	atCAGCCTGCCTCGGCCTCCCAAAGTg	>hsa_piR_022437|gb|DQ600690|Homo	NM_001127691.3	205	-50.85	2	26	1975	2001	24	0.8333	0.9583	||||||||||	|:|||||:||
1875	uaGGUGGGCGGAGUCGGAGGGUUUCAu	||:||:||||::||||||||||||	atCCGCCTGCCTTGGCCTCCCAAAGTg	>hsa_piR_022437|gb|DQ600690|Homo	NM_001127696.2	209	-53.63	2	26	3357	3383	24	0.8333	1	||||||||||	|:||||::||
1876	uaGGUGGGCGGAGUCGGAGGGUUUCAu	|::||:||||::||||||||||||	atCTGCCTGCCTTGGCCTCCCAAAGTg	>hsa_piR_022437|gb|DQ600690|Homo	NM_001127696.2	205	-48.94	2	26	5792	5818	24	0.7917	1	||||||||||	|:||||::||
1877	uaGGUGGGCGGAGUCGGAGGGUUUCAu	||:||:||||::||||||||||||	atCCGCCTGCCTTGGCCTCCCAAAGTg	>hsa_piR_022437|gb|DQ600690|Homo	NM_001127697.2	209	-53.63	2	26	3288	3314	24	0.8333	1	||||||||||	|:||||::||
1878	uaGGUGGGCGGAGUCGGAGGGUUUCAu	|::||:||||::||||||||||||	atCTGCCTGCCTTGGCCTCCCAAAGTg	>hsa_piR_022437|gb|DQ600690|Homo	NM_001127697.2	205	-48.94	2	26	5723	5749	24	0.7917	1	||||||||||	|:||||::||
1879	uaGGUGGGCGGAGUCGGAGGGUUUCAu	|||||| :|||:||||||||||||	atCCACCCATCTCGGCCTCCCAAAGTg	>hsa_piR_022437|gb|DQ600690|Homo	NM_001127898.4	209	-53.33	2	26	7189	7215	24	0.875	0.9583	||||||||||	|| :|||:||
1880	uaGGUGGGCGGAGUCGGAGGGUUUCAu	|||||| :|||:||||||||||||	atCCACCCATCTCGGCCTCCCAAAGTg	>hsa_piR_022437|gb|DQ600690|Homo	NM_001127899.4	209	-53.33	2	26	7448	7474	24	0.875	0.9583	||||||||||	|| :|||:||
1881	uaGGUGGGCGGAGUCGGAGGGUUUCAu	|||||:||:|||||||||||||||	atCCACCTGCTTCAGCCTCCCAAAGTg	>hsa_piR_022437|gb|DQ600690|Homo	NM_001128126.3	217	-56.09	2	26	1720	1746	24	0.9167	1	||||||||||	|:||:|||||
1882	uaGGUGGGCGGAGUCGGAGGGUUUCAu	||:|||||||| ||||||||||||	atCCGCCCGCCTCTGCCTCCCAAAGTg	>hsa_piR_022437|gb|DQ600690|Homo	NM_001128227.3	213	-57.02	2	26	4558	4584	24	0.9167	0.9583	||||||||||	||||||| ||
1883	uaGGUGGGCGGAGUCGGAGGGUUUCAu	|||||| ||||:||||||||||||	atCCACCCACCTCGGCCTCCCAAAGTg	>hsa_piR_022437|gb|DQ600690|Homo	NM_001128423.2	213	-55.34	2	26	1643	1669	24	0.9167	0.9583	||||||||||	|| ||||:||
1884	uaGGUGGGCGGAGUCGGAGGGUUUCAu	||:||:||||::||||||||||||	atCCGCCTGCCTTGGCCTCCCAAAGTg	>hsa_piR_022437|gb|DQ600690|Homo	NM_001128610.3	209	-53.63	2	26	15601	15627	24	0.8333	1	||||||||||	|:||||::||
1885	uaGGUGGGCGGAGUCGGAGGGUUUCAu	|||||:||||| |||||||||||	atCCACCTGCCTCCACCTCCCAAAGTg	>hsa_piR_022437|gb|DQ600690|Homo	NM_001128610.3	205	-51.27	2	26	7193	7219	24	0.875	0.9167	||||||||||	|:||||| |
1886	uaGGUGGGCGGAGUCGGAGGGUUUCAu	|| ||| |:||:||||||||||||	atCCTCCCACTTCGGCCTCCCAAAGTt	>hsa_piR_022437|gb|DQ600690|Homo	NM_001128610.3	201	-46.6	2	26	6930	6956	24	0.8333	0.9167	||||||||||	|| |:||:||
1887	uaggugggcGGAGUCGGAGGGUUUCAu	| |::|:||||||||||	#NAME?	>hsa_piR_022437|gb|DQ600690|Homo	NM_001128636.3	170	-27.36	2	19	1	20	17	0.7647	0.9412	||||||||||	| |::|:
1888	uaGGUGGGCGGAGUCGGAGGGUUUCAu	||||||||||||||||||||||||	atCCACCCGCCTCAGCCTCCCAAAGTg	>hsa_piR_022437|gb|DQ600690|Homo	NM_001128827.3	225	-61.83	2	26	4084	4110	24	1	1	||||||||||	||||||||||
1889	uaGGUGGGCGGAGUCGGAGGGUUUCAu	|::|||||||::||||||||||||	atCTGCCCGCCTTGGCCTCCCAAAGTg	>hsa_piR_022437|gb|DQ600690|Homo	NM_001128827.3	209	-51.74	2	26	5507	5533	24	0.8333	1	||||||||||	||||||::||
1890	uaGGUGGGCGGAGUCGGAGGGUUUCAu	|| ||| ||||:||||||||||||	ccCCCCCCCCCTCGGCCTCCCAAAGTg	>hsa_piR_022437|gb|DQ600690|Homo	NM_001128827.3	205	-47.77	2	26	6036	6062	24	0.875	0.9167	||||||||||	|| ||||:||
1891	uaGGUGGGCGGAGUCGGAGGGUUUCAu	||||||||||||||||||||||||	atCCACCCGCCTCAGCCTCCCAAAGTg	>hsa_piR_022437|gb|DQ600690|Homo	NM_001128835.3	225	-61.83	2	26	1853	1879	24	1	1	||||||||||	||||||||||
1892	uaGGUGGGCGGAGUCGGAGGGUUUCAu	|::|||||||::||||||||||||	atCTGCCCGCCTTGGCCTCCCAAAGTa	>hsa_piR_022437|gb|DQ600690|Homo	NM_001128835.3	209	-51.84	2	26	1157	1183	24	0.8333	1	||||||||||	||||||::||
1893	uaGGUGGGCGGAGUCGGAGGGUUUCAu	:| ||:||||||||||||||||||	atTCTCCTGCCTCAGCCTCCCAAAGTg	>hsa_piR_022437|gb|DQ600690|Homo	NM_001128835.3	209	-51.81	2	26	2060	2086	24	0.875	0.9583	||||||||||	|:||||||||
1894	uaGGUGGGCGGAGUCGGAGGGUUUCAu	|::||: |||::||||||||||||	atCTGCCTACCTTGGCCTCCCAAAGTg	>hsa_piR_022437|gb|DQ600690|Homo	NM_001128855.3	197	-42.95	2	26	2280	2306	24	0.75	0.9583	||||||||||	|: |||::||
1895	uaGGUGGGCGGAGUCGGAGGGUUUCAu	|||||| ||||:||||||||||||	atCCACCCTCCTCGGCCTCCCAAAGTg	>hsa_piR_022437|gb|DQ600690|Homo	NM_001128926.3	213	-54.95	2	26	3016	3042	24	0.9167	0.9583	||||||||||	|| ||||:||
1896	uaGGUGGGCGGAGUCGGAGGGUUUCAu	||:||||||||:||||||||||||	atCCGCCCGCCTCGGCCTCCCAAAGTg	>hsa_piR_022437|gb|DQ600690|Homo	NM_001129819.2	217	-60.71	2	26	2691	2717	24	0.9167	1	||||||||||	|||||||:||
1897	uagguggGCGG-AGUCGGAGGGUUUCAu	:||| ||||||||||||||	gtggaaaTGCCAACAGCCTCCCAAAGTg	>hsa_piR_022437|gb|DQ600690|Homo	NM_001129891.3	179	-36.17	2	21	1501	1528	20	0.85	0.9	||||||||||	:||| ||||
1898	uaGGUGGGCGGAGUCGGAGGGUUUCAu	|| ||:||||||||||||||||||	atCCTCCTGCCTCAGCCTCCCAAAGTg	>hsa_piR_022437|gb|DQ600690|Homo	NM_001129896.3	213	-54.64	2	26	173	199	24	0.9167	0.9583	||||||||||	|:||||||||
1899	uaGGUGGGCGGAGUCGGAGGGUUUCAu	|||||:||||::||||||||||||	atCCACCTGCCTTGGCCTCCCAAAGTg	>hsa_piR_022437|gb|DQ600690|Homo	NM_001130031.2	213	-54.1	2	26	3718	3744	24	0.875	1	||||||||||	|:||||::||
1900	uaGGUGGGCGGAGUCGGAGGGUUUCAu	|::| :|||||| ||||||||||	atCTGCATGCCTCATACTCCCAAAGTa	>hsa_piR_022437|gb|DQ600690|Homo	NM_001130031.2	189	-38.1	2	26	6815	6841	24	0.75	0.875	||||||||||	:||||||
1901	uaGGUGGGCGGAGUCGGAGGGUUUCAu	|| |:| :|| :||||||||||||	atCCTCTCTTCTGGGCCTCCCAAAGTg	>hsa_piR_022437|gb|DQ600690|Homo	NM_001130031.2	189	-40.61	2	26	10077	10103	24	0.75	0.875	||||||||||	:| :|| :||
1902	uaGGUGGGCGGAGUCGGAGGGUUUCAu	| :||:| :||| |||||||||||	ttCAGCCTGATTCAACCTCCCAAAGTg	>hsa_piR_022437|gb|DQ600690|Homo	NM_001130031.2	189	-36.66	2	26	11316	11342	24	0.75	0.875	||||||||||	|:| :||| |
1903	uaGGUGGGCGGAGUCGGAGGGUUUCAu	|||||:||||::||||||||||||	atCCACCTGCCTTGGCCTCCCAAAGTg	>hsa_piR_022437|gb|DQ600690|Homo	NM_001130032.2	213	-54.1	2	26	3665	3691	24	0.875	1	||||||||||	|:||||::||
1904	uaGGUGGGCGGAGUCGGAGGGUUUCAu	|::| :|||||| ||||||||||	atCTGCATGCCTCATACTCCCAAAGTa	>hsa_piR_022437|gb|DQ600690|Homo	NM_001130032.2	189	-38.1	2	26	6762	6788	24	0.75	0.875	||||||||||	:||||||
1905	uaGGUGGGCGGAGUCGGAGGGUUUCAu	|| |:| :|| :||||||||||||	atCCTCTCTTCTGGGCCTCCCAAAGTg	>hsa_piR_022437|gb|DQ600690|Homo	NM_001130032.2	189	-40.61	2	26	10024	10050	24	0.75	0.875	||||||||||	:| :|| :||
1906	uaGGUGGGCGGAGUCGGAGGGUUUCAu	| :||:| :||| |||||||||||	ttCAGCCTGATTCAACCTCCCAAAGTg	>hsa_piR_022437|gb|DQ600690|Homo	NM_001130032.2	189	-36.66	2	26	11263	11289	24	0.75	0.875	||||||||||	|:| :||| |
1907	uaGGUGGGCGGAGUCGGAGGGUUUCAu	|| ||| ||||: |||||||||||	atCCTCCCACCTCGACCTCCCAAAGTg	>hsa_piR_022437|gb|DQ600690|Homo	NM_001130069.4	197	-45.65	2	26	1678	1704	24	0.8333	0.875	||||||||||	|| ||||: |
1908	uaGGUGGGCGGAGUCGGAGGGUUUCAu	|||||||||||:||||||||||||	atCCACCCGCCTCGGCCTCCCAAAGTg	>hsa_piR_022437|gb|DQ600690|Homo	NM_001130072.2	221	-61.18	2	26	7185	7211	24	0.9583	1	||||||||||	|||||||:||
1909	uaGGUGGGCGGAGUCGGAGGGUUUCAu	||:||:|||||:||||||||||||	atCCGCCTGCCTCGGCCTCCCAAAGTg	>hsa_piR_022437|gb|DQ600690|Homo	NM_001130072.2	213	-57.91	2	26	5669	5695	24	0.875	1	||||||||||	|:|||||:||
1910	uaGGUGGGCGGAGUCGGAGGGUUUCAu	||:||:|||||:||||||||||||	atCCGCCTGCCTCGGCCTCCCAAAGTa	>hsa_piR_022437|gb|DQ600690|Homo	NM_001130072.2	213	-58.01	2	26	8886	8912	24	0.875	1	||||||||||	|:|||||:||
1911	uaGGUGGGCGGAGUCGGAGGGUUUCAu	||:||| ||||:||||||||||||	ttCCGCCCACCTCGGCCTCCCAAAGTg	>hsa_piR_022437|gb|DQ600690|Homo	NM_001130072.2	209	-53.69	2	26	9722	9748	24	0.875	0.9583	||||||||||	|| ||||:||
1912	uaGGUGGGCGGAGUCGGAGGGUUUCAu	||:||||| | : |||||||||||	atCCGCCCGCGTGGACCTCCCAAAGTg	>hsa_piR_022437|gb|DQ600690|Homo	NM_001130072.2	193	-45.63	2	26	14568	14594	24	0.7917	0.875	||||||||||	|||| | : |
1913	uaGGUGGGCGGAGUCGGAGGGUUUCAu	|||||: |||::||||||||||||	atCCACCTACCTTGGCCTCCCAAAGTg	>hsa_piR_022437|gb|DQ600690|Homo	NM_001130475.3	205	-48.11	2	26	2200	2226	24	0.8333	0.9583	||||||||||	|: |||::||
1914	uaGGUGGGCGGAGUCGGAGGGUUUCAu	|::||:||||||||||||||||||	atCTGCCTGCCTCAGCCTCCCAAAGTg	>hsa_piR_022437|gb|DQ600690|Homo	NM_001130519.3	213	-53.87	2	26	387	413	24	0.875	1	||||||||||	|:||||||||
1915	uaGGUGGGCGGAGUCGGAGGGUUUCAu	|::||:||||||||||||||||||	atCTGCCTGCCTCAGCCTCCCAAAGTg	>hsa_piR_022437|gb|DQ600690|Homo	NM_001130520.3	213	-53.87	2	26	387	413	24	0.875	1	||||||||||	|:||||||||
1916	uaGGUGGGCGGAGUCGGAGGGUUUCAu	||:||||||||:||||||||||||	atCCGCCCGCCTCGGCCTCCCAAAGTg	>hsa_piR_022437|gb|DQ600690|Homo	NM_001130524.2	217	-60.71	2	26	12124	12150	24	0.9167	1	||||||||||	|||||||:||
1917	uaGGUGGGCGGAGUCGGAGGGUUUCAu	|||||:|||||:||||||||||||	atCCACCTGCCTCGGCCTCCCAAAGTg	>hsa_piR_022437|gb|DQ600690|Homo	NM_001130524.2	217	-58.38	2	26	12509	12535	24	0.9167	1	||||||||||	|:|||||:||
1918	uaGGUGGGCGGAGUCGGAGGGUUUCAu	|::||:||:||:||||||||||||	atCTGCCTGCTTCGGCCTCCCAAAGTg	>hsa_piR_022437|gb|DQ600690|Homo	NM_001130524.2	205	-50.28	2	26	7678	7704	24	0.7917	1	||||||||||	|:||:||:||
1919	uaGGUGGGCGGAGUCGGAGGGUUUCAu	|| ||| |||::||||||||||||	atCCTCCCACCTTGGCCTCCCAAAGTg	>hsa_piR_022437|gb|DQ600690|Homo	NM_001130524.2	201	-46.67	2	26	5813	5839	24	0.8333	0.9167	||||||||||	|| |||::||
1920	uaGGU-GGGCGGAGUCGGAGGGUUUCAu	:|| ||:||||::||||||||||||	caTCATCCTGCCTTGGCCTCCCAAAGTg	>hsa_piR_022437|gb|DQ600690|Homo	NM_001130524.2	200	-47.02	2	26	5067	5094	25	0.8	0.96	||||||||||	|:||||::||
1921	uaGGUGGGCGGAGUCGGAGGGUUUCAu	|||||| | ::||||||||||||	atCCACCCCCACTGGCCTCCCAAAGTg	>hsa_piR_022437|gb|DQ600690|Homo	NM_001130524.2	193	-45.76	2	26	9999	10025	24	0.7917	0.875	||||||||||	|| | ::||
1922	uaGGUGGGCGGAGUCGGAGGGUUUCAu	|||||| ||||:||||||||||||	atCCACCCACCTCGGCCTCCCAAAGTg	>hsa_piR_022437|gb|DQ600690|Homo	NM_001130678.3	213	-55.34	2	26	6273	6299	24	0.9167	0.9583	||||||||||	|| ||||:||
1923	uaGGUGGGCGGAGUCGGAGGGUUUCAu	||:|||||| ::||||||||||||	atCCGCCCGCCGTGGCCTCCCAAAGTg	>hsa_piR_022437|gb|DQ600690|Homo	NM_001130678.3	205	-53.19	2	26	8323	8349	24	0.8333	0.9583	||||||||||	||||| ::||
1924	uaGGUGGGCGGAGUCGGAGGGUUUCAu	|::||:||:|| ||||||||||||	atCTGCCTGCTTCTGCCTCCCAAAGTg	>hsa_piR_022437|gb|DQ600690|Homo	NM_001130678.3	201	-46.59	2	26	3488	3514	24	0.7917	0.9583	||||||||||	|:||:|| ||
1925	uaGGUGGGCGGAGUCGGAGGGUUUCAu	|||||| ||||:||||||||||||	atCCACCCACCTCGGCCTCCCAAAGTg	>hsa_piR_022437|gb|DQ600690|Homo	NM_001130679.2	213	-55.34	2	26	7670	7696	24	0.9167	0.9583	||||||||||	|| ||||:||
1926	uaGGUGGGCGGAGUCGGAGGGUUUCAu	|| ||| |:|||||||||||||||	atCCTCCCACTTCAGCCTCCCAAAGTg	>hsa_piR_022437|gb|DQ600690|Homo	NM_001130679.2	205	-48.66	2	26	1979	2005	24	0.875	0.9167	||||||||||	|| |:|||||
1927	uaGGUGGGCGGAGUCGGAGGGUUUCAu	||:|||||| ::||||||||||||	atCCGCCCGCCGTGGCCTCCCAAAGTg	>hsa_piR_022437|gb|DQ600690|Homo	NM_001130679.2	205	-53.19	2	26	9720	9746	24	0.8333	0.9583	||||||||||	||||| ::||
1928	uaGGUGGGCGGAGUCGGAGGGUUUCAu	|::||:||:|| ||||||||||||	atCTGCCTGCTTCTGCCTCCCAAAGTg	>hsa_piR_022437|gb|DQ600690|Homo	NM_001130679.2	201	-46.59	2	26	4885	4911	24	0.7917	0.9583	||||||||||	|:||:|| ||
1929	uaGGUGGGCGGAGUCGGAGGGUUUCAu	|||||| ||||:||||||||||||	atCCACCCACCTCGGCCTCCCAAAGTg	>hsa_piR_022437|gb|DQ600690|Homo	NM_001130701.2	213	-55.34	2	26	3204	3230	24	0.9167	0.9583	||||||||||	|| ||||:||
1930	uaGGUGGGCGGAGUCGGAGGGUUUCAu	|||||:||||||||||||||||||	atCCACCTGCCTCAGCCTCCCAAAGTg	>hsa_piR_022437|gb|DQ600690|Homo	NM_001130710.2	221	-59.03	2	26	1848	1874	24	0.9583	1	||||||||||	|:||||||||
1931	uaGGUGGGCGGAGUCGGAGGGUUUCAu	||||||||||::|:||||||||||	atCCACCCGCCTTGGTCTCCCAAAGTg	>hsa_piR_022437|gb|DQ600690|Homo	NM_001130721.2	213	-54.61	2	26	4594	4620	24	0.875	1	||||||||||	||||||::|:
1932	uaGGUGGGCGGAGUCGGAGGGUUUCAu	|:||||||||||||||||||||||	gtCTACCCGCCTCAGCCTCCCAAAGTg	>hsa_piR_022437|gb|DQ600690|Homo	NM_001130820.3	221	-58.81	2	26	3915	3941	24	0.9583	1	||||||||||	||||||||||
1933	uaGGUGGGCGGAGUCGGAGGGUUUCAu	||:||||:||||||||||||||||	atCCGCCCGTCTCAGCCTCCCAAAGTg	>hsa_piR_022437|gb|DQ600690|Homo	NM_001130820.3	217	-59.07	2	26	3523	3549	24	0.9167	1	||||||||||	|||:||||||
1934	uaGGUGGGCGGAGUCGGAGGGUUUCAu	|:||||||||||||||||||||||	gtCTACCCGCCTCAGCCTCCCAAAGTg	>hsa_piR_022437|gb|DQ600690|Homo	NM_001130821.3	221	-58.81	2	26	4036	4062	24	0.9583	1	||||||||||	||||||||||
1935	uaGGUGGGCGGAGUCGGAGGGUUUCAu	||:||||:||||||||||||||||	atCCGCCCGTCTCAGCCTCCCAAAGTg	>hsa_piR_022437|gb|DQ600690|Homo	NM_001130821.3	217	-59.07	2	26	3644	3670	24	0.9167	1	||||||||||	|||:||||||
1936	uaGGUGGGCGGAGUCGGAGGGUUUCAu	|:||||||||||||||||||||||	gtCTACCCGCCTCAGCCTCCCAAAGTg	>hsa_piR_022437|gb|DQ600690|Homo	NM_001130822.3	221	-58.81	2	26	3928	3954	24	0.9583	1	||||||||||	||||||||||
1937	uaGGUGGGCGGAGUCGGAGGGUUUCAu	||:||||:||||||||||||||||	atCCGCCCGTCTCAGCCTCCCAAAGTg	>hsa_piR_022437|gb|DQ600690|Homo	NM_001130822.3	217	-59.07	2	26	3536	3562	24	0.9167	1	||||||||||	|||:||||||
1938	uaGGUGGGCGGAGUCGGAGGGUUUCAu	|::||||||||:||||||||||||	atCTGCCCGCCTCGGCCTCCCAAAGTg	>hsa_piR_022437|gb|DQ600690|Homo	NM_001130841.1	213	-56.02	2	26	2011	2037	24	0.875	1	||||||||||	|||||||:||
1939	uaGGUGGGCGGAGUCGGAGGGUUUCAu	||:||| |||::||||||||||||	atCCGCCCACCTTGGCCTCCCAAAGTg	>hsa_piR_022437|gb|DQ600690|Homo	NM_001130841.1	205	-50.59	2	26	2394	2420	24	0.8333	0.9583	||||||||||	|| |||::||
1940	uaGGUGGGCGGAGUCGGAGGGUUUCAu	|::||:|||||:||||||||||||	atCTGCCTGCCTCGGCCTCCCAAAGTg	>hsa_piR_022437|gb|DQ600690|Homo	NM_001130842.2	209	-53.22	2	26	2671	2697	24	0.8333	1	||||||||||	|:|||||:||
1941	uaGGUGGGCGGAGUCGGAGGGUUUCAu	||:||||||||:||||||||||||	acCCGCCCGCCTCGGCCTCCCAAAGTg	>hsa_piR_022437|gb|DQ600690|Homo	NM_001130912.3	217	-58.59	2	26	8275	8301	24	0.9167	1	||||||||||	|||||||:||
1942	uaGGUGGGCGGAGUCGGAGGGUUUCAu	|||||:||||::| ||||||||||	atCCACCTGCCTTGGACTCCCAAAGTg	>hsa_piR_022437|gb|DQ600690|Homo	NM_001130912.3	205	-47.61	2	26	471	497	24	0.8333	0.9583	||||||||||	|:||||::|
1943	uaGGUGGGCGGAGUCGGAGGGUUUCAu	|| ||| |||::||||||||||||	gtCCTCCCACCTTGGCCTCCCAAAGTg	>hsa_piR_022437|gb|DQ600690|Homo	NM_001130912.3	201	-46.36	2	26	10592	10618	24	0.8333	0.9167	||||||||||	|| |||::||
1944	uaGGUGGGCGGAGUCGGAGGGUUUCAu	||:||||||||:||||||||||||	atCCGCCCGCCTCGGCCTCCCAAAGTg	>hsa_piR_022437|gb|DQ600690|Homo	NM_001130919.3	217	-60.71	2	26	1622	1648	24	0.9167	1	||||||||||	|||||||:||
1945	uaGGUGGGCGGAGUCGGAGGGUUUCAu	||:||||||||:||||||||||||	atCCGCCCGCCTCGGCCTCCCAAAGTg	>hsa_piR_022437|gb|DQ600690|Homo	NM_001130920.3	217	-60.71	2	26	1781	1807	24	0.9167	1	||||||||||	|||||||:||
1946	uaGGUGGGCGGAGUCGGAGGGUUUCAu	||:||||||||:||||||||||||	atCCGCCCGCCTCGGCCTCCCAAAGTg	>hsa_piR_022437|gb|DQ600690|Homo	NM_001130921.3	217	-60.71	2	26	1874	1900	24	0.9167	1	||||||||||	|||||||:||
1947	uaGGUGGGCGGAGUCGGAGGGUUUCAu	||:||||||||:||||||||||||	atCCGCCCGCCTCGGCCTCCCAAAGTg	>hsa_piR_022437|gb|DQ600690|Homo	NM_001130922.3	217	-60.71	2	26	1623	1649	24	0.9167	1	||||||||||	|||||||:||
1948	uaGGUGGGCGGAGUCGGAGGGUUUCAu	||:||||||||:||||||||||||	atCCGCCCGCCTCGGCCTCCCAAAGTg	>hsa_piR_022437|gb|DQ600690|Homo	NM_001130923.3	217	-60.71	2	26	1808	1834	24	0.9167	1	||||||||||	|||||||:||
1949	uaGGUGGGCGGAGUCGGAGGGUUUCAu	|::||| |:|||||||||||||||	atCTGCCCACTTCAGCCTCCCAAAGTg	>hsa_piR_022437|gb|DQ600690|Homo	NM_001130929.2	205	-47.89	2	26	2198	2224	24	0.8333	0.9583	||||||||||	|| |:|||||
1950	uaGGUGGGCGGAGUCGGAGGGUUUCAu	||:||||||||:||||||||||||	atCCGCCCGCCTCGGCCTCCCAAAGTg	>hsa_piR_022437|gb|DQ600690|Homo	NM_001131028.2	217	-60.71	2	26	340	366	24	0.9167	1	||||||||||	|||||||:||
1951	uaGGUGGGCGGAGUCGGAGGGUUUCAu	:|| :||||||||||||||||||	ctTCAGGTGCCTCAGCCTCCCAAAGTg	>hsa_piR_022437|gb|DQ600690|Homo	NM_001134223.2	201	-46.49	2	26	6323	6349	24	0.8333	0.9167	||||||||||	:||||||||
1952	uagGUGGGCGGAGUCGGAGGGUUUCAu	||||:||||:: |||||||||||	atgCACCTGCCTTGACCTCCCAAAGTg	>hsa_piR_022437|gb|DQ600690|Homo	NM_001134337.3	200	-45.29	2	25	6103	6129	23	0.8261	0.9565	||||||||||	|:||||:: |
1953	uagGUGGGCGGAGUCGGAGGGUUUCAu	||||:||||:: |||||||||||	atgCACCTGCCTTGACCTCCCAAAGTg	>hsa_piR_022437|gb|DQ600690|Homo	NM_001134338.3	200	-45.29	2	25	6172	6198	23	0.8261	0.9565	||||||||||	|:||||:: |
1954	uaGGUGGGCGGAGUCGGAGGGUUUCAu	|::||||||||:||||||||||||	atCTGCCCGCCTCGGCCTCCCAAAGTg	>hsa_piR_022437|gb|DQ600690|Homo	NM_001134400.1	213	-56.02	2	26	4150	4176	24	0.875	1	||||||||||	|||||||:||
1955	uaGGUGGGCGGAGUCGGAGGGUUUCAu	|::||||||||:||||||||||||	atCTGCCCGCCTCGGCCTCCCAAAGTg	>hsa_piR_022437|gb|DQ600690|Homo	NM_001134402.1	213	-56.02	2	26	3956	3982	24	0.875	1	||||||||||	|||||||:||
1956	uaGGUGGGCGGAGUCGGAGGGUUUCAu	|::||||||||:||||||||||||	atCTGCCCGCCTCGGCCTCCCAAAGTg	>hsa_piR_022437|gb|DQ600690|Homo	NM_001134403.1	213	-56.02	2	26	4188	4214	24	0.875	1	||||||||||	|||||||:||
1957	uaGGUGGGCGGAGUCGGAGGGUUUCAu	|::||||||||:||||||||||||	atCTGCCCGCCTCGGCCTCCCAAAGTg	>hsa_piR_022437|gb|DQ600690|Homo	NM_001134404.2	213	-56.02	2	26	4250	4276	24	0.875	1	||||||||||	|||||||:||
1958	uaGGUGGGCGGAGUCGGAGGGUUUCAu	||:||| :|||:||||||||||||	atCCGCCCATCTCGGCCTCCCAAAGTg	>hsa_piR_022437|gb|DQ600690|Homo	NM_001134415.1	205	-52.86	2	26	2523	2549	24	0.8333	0.9583	||||||||||	|| :|||:||
1959	uaGGUGGGCGGAGUCGGAGGGUUUCAu	|||||| ||||:||||||||||||	atCCACCCACCTCGGCCTCCCAAAGTg	>hsa_piR_022437|gb|DQ600690|Homo	NM_001134462.2	213	-55.34	2	26	1626	1652	24	0.9167	0.9583	||||||||||	|| ||||:||
1960	uaGGUGGGCGGAGUCGGAGGGUUUCAu	|||||:|:|||:||||||||||||	atCCACCTGTCTCGGCCTCCCAAAGTg	>hsa_piR_022437|gb|DQ600690|Homo	NM_001134656.2	213	-56.09	2	26	2818	2844	24	0.875	1	||||||||||	|:|:|||:||
1961	uaGGUGGGCGGAGUCGGAGGGUUUCAu	|||:|| |||||||||||||||||	atCCATCCACCTCAGCCTCCCAAAGTg	>hsa_piR_022437|gb|DQ600690|Homo	NM_001134657.1	213	-53.64	2	26	2065	2091	24	0.9167	0.9583	||||||||||	|| |||||||
1962	uaGGUGGGCGGAGUCGGAGGGUUUCAu	||| |:|||||:||||||||||||	atCCAACTGCCTCGGCCTCCCAAAGTg	>hsa_piR_022437|gb|DQ600690|Homo	NM_001134670.1	209	-51.51	2	26	1434	1460	24	0.875	0.9583	||||||||||	|:|||||:||
1963	uaGGUGGGCGGAGUCGGAGGGUUUCAu	||:||| |||||||||||||||||	atCCGCCCACCTCAGCCTCCCAAAGTg	>hsa_piR_022437|gb|DQ600690|Homo	NM_001134672.2	213	-55.52	2	26	8030	8056	24	0.9167	0.9583	||||||||||	|| |||||||
1964	uaGGUGGGCGGAGUCGGAGGGUUUCAu	:||||:||||| ||||||||||||	atTCACCTGCCTCTGCCTCCCAAAGTt	>hsa_piR_022437|gb|DQ600690|Homo	NM_001134672.2	209	-50.45	2	26	1370	1396	24	0.875	0.9583	||||||||||	|:||||| ||
1965	uaGGUGGGCGGAGUCGGAGGGUUUCAu	|||||| ||||:||||||||||||	atCCACCCTCCTCGGCCTCCCAAAGTg	>hsa_piR_022437|gb|DQ600690|Homo	NM_001135036.2	213	-54.95	2	26	2690	2716	24	0.9167	0.9583	||||||||||	|| ||||:||
1966	uaGGUGGGCGGAGUCGGAGGGUUUCAu	|::||| |||||||||||||||||	atCTGCCCACCTCAGCCTCCCAAAGTg	>hsa_piR_022437|gb|DQ600690|Homo	NM_001135036.2	209	-50.83	2	26	1187	1213	24	0.875	0.9583	||||||||||	|| |||||||
1967	uaGGUGGGCGGAGUCGGAGGGUUUCAu	||:||:||||| ||||||||||||	atCCGCCTGCCTCCGCCTCCCAAAGTg	>hsa_piR_022437|gb|DQ600690|Homo	NM_001135036.2	209	-53.15	2	26	1673	1699	24	0.875	0.9583	||||||||||	|:||||| ||
1968	uaGGUGGGCGGAGUCGGAGGGUUUCAu	|| ||:||||:| |||||||||||	atCCTCCTGCCTTA-CCTCCCAAAGTg	>hsa_piR_022437|gb|DQ600690|Homo	NM_001135037.2	195	-45.54	2	26	2974	2999	24	0.8333	0.9167	||||||||||	|:||||:| |
1969	uaGGUGGGCGGAGUCGGAGGGUUUCAu	|::||||||||:||||||||||||	atCTGCCCGCCTCGGCCTCCCAAAGTg	>hsa_piR_022437|gb|DQ600690|Homo	NM_001135095.2	213	-56.02	2	26	7419	7445	24	0.875	1	||||||||||	|||||||:||
1970	uaGGUGGGCGGAGUCGGAGGGUUUCAu	|::|||||||| ||||||||||||	atCTGCCCGCCTCTGCCTCCCAAAGTg	>hsa_piR_022437|gb|DQ600690|Homo	NM_001135163.1	209	-52.33	2	26	2250	2276	24	0.875	0.9583	||||||||||	||||||| ||
1971	uagguGGGCGGAGUCGGAGGGUUUCAu	||:||||:|||||||||||||	attttCCTGCCTTAGCCTCCCAAAGTc	>hsa_piR_022437|gb|DQ600690|Homo	NM_001135179.2	202	-44.29	2	23	4275	4301	21	0.9048	1	||||||||||	|:||||:|||
1972	uaGGUGGGCGGAGUCGGAGGGUUUCAu	|||||| |||||||||||||||||	atCCACCCTCCTCAGCCTCCCAAAGTg	>hsa_piR_022437|gb|DQ600690|Homo	NM_001135255.2	217	-55.6	2	26	5541	5567	24	0.9583	0.9583	||||||||||	|| |||||||
1973	uaGGUGGGCGGAGUCGGAGGGUUUCAu	|| ||||||||:|:||||||||||	gtCCTCCCGCCTCGGTCTCCCAAAGTg	>hsa_piR_022437|gb|DQ600690|Homo	NM_001135255.2	209	-54.19	2	26	6758	6784	24	0.875	0.9583	||||||||||	|||||||:|:
1974	uaGGUGGGCGGAGUCGGAGGGUUUCAu	|||||| |||||||||||||||||	atCCACCCTCCTCAGCCTCCCAAAGTg	>hsa_piR_022437|gb|DQ600690|Homo	NM_001135256.1	217	-55.6	2	26	5504	5530	24	0.9583	0.9583	||||||||||	|| |||||||
1975	uaGGUGGGCGGAGUCGGAGGGUUUCAu	|| ||||||||:|:||||||||||	gtCCTCCCGCCTCGGTCTCCCAAAGTg	>hsa_piR_022437|gb|DQ600690|Homo	NM_001135256.1	209	-54.19	2	26	6721	6747	24	0.875	0.9583	||||||||||	|||||||:|:
1976	uaGGUGGGCGGAGUCGGAGGGUUUCAu	|||||||||||:||||||||||||	atCCACCCGCCTCGGCCTCCCAAAGTg	>hsa_piR_022437|gb|DQ600690|Homo	NM_001135649.3	221	-61.18	2	26	2144	2170	24	0.9583	1	||||||||||	|||||||:||
1977	uaGGUGGGCGGAGUCGGAGGGUUUCAu	|||||:|||||:||||||||||||	atCCACCTGCCTCGGCCTCCCAAAGTg	>hsa_piR_022437|gb|DQ600690|Homo	NM_001135651.3	217	-58.38	2	26	2363	2389	24	0.9167	1	||||||||||	|:|||||:||
1978	uaGGUGGGCGGAGUCGGAGGGUUUCAu	:|||::||||::||||||||||||	atTCACTTGCCTTGGCCTCCCAAAGTg	>hsa_piR_022437|gb|DQ600690|Homo	NM_001135651.3	205	-48.54	2	26	5268	5294	24	0.7917	1	||||||||||	::||||::||
1979	uaGGUGGGCGGAGUCGGAGGGUUUCAu	|||||:|||||:||||||||||||	atCCACCTGCCTCGGCCTCCCAAAGTg	>hsa_piR_022437|gb|DQ600690|Homo	NM_001135652.2	217	-58.38	2	26	2000	2026	24	0.9167	1	||||||||||	|:|||||:||
1980	uaGGUGGGCGGAGUCGGAGGGUUUCAu	||:||:||||::||||||||||||	atCCGCCTGCCTTGGCCTCCCAAAGTg	>hsa_piR_022437|gb|DQ600690|Homo	NM_001135673.4	209	-53.63	2	26	3432	3458	24	0.8333	1	||||||||||	|:||||::||
1981	uaGGUGGGCGGAGUCGGAGGGUUUCAu	||:||| ||||:||||||||||||	atCCGCCCACCTCGGCCTCCCAAAGTg	>hsa_piR_022437|gb|DQ600690|Homo	NM_001135700.2	209	-54.87	2	26	4022	4048	24	0.875	0.9583	||||||||||	|| ||||:||
1982	uaGGUGGGCGGAGUCGGAGGGUUUCAu	||:||| :|||| |||||||||||	atCCGCCCATCTCAACCTCCCAAAGTg	>hsa_piR_022437|gb|DQ600690|Homo	NM_001135700.2	201	-47.24	2	26	3399	3425	24	0.8333	0.9167	||||||||||	|| :|||| |
1983	uaGGUGGGCGGAGUCGGAGGGUUUCAu	||:||| ||||:||||||||||||	atCCGCCCACCTCGGCCTCCCAAAGTg	>hsa_piR_022437|gb|DQ600690|Homo	NM_001135701.2	209	-54.87	2	26	4071	4097	24	0.875	0.9583	||||||||||	|| ||||:||
1984	uaGGUGGGCGGAGUCGGAGGGUUUCAu	||:||| :|||| |||||||||||	atCCGCCCATCTCAACCTCCCAAAGTg	>hsa_piR_022437|gb|DQ600690|Homo	NM_001135701.2	201	-47.24	2	26	3448	3474	24	0.8333	0.9167	||||||||||	|| :|||| |
1985	uaGGUGGGCGGAGUCGGAGGGUUUCAu	||:||| ||||:||||||||||||	atCCGCCCACCTCGGCCTCCCAAAGTg	>hsa_piR_022437|gb|DQ600690|Homo	NM_001135702.2	209	-54.87	2	26	4110	4136	24	0.875	0.9583	||||||||||	|| ||||:||
1986	uaGGUGGGCGGAGUCGGAGGGUUUCAu	||:||| :|||| |||||||||||	atCCGCCCATCTCAACCTCCCAAAGTg	>hsa_piR_022437|gb|DQ600690|Homo	NM_001135702.2	201	-47.24	2	26	3487	3513	24	0.8333	0.9167	||||||||||	|| :|||| |
1987	uaGGUGGGCGGAGUCGGAGGGUUUCAu	|||||:|||||:||||||||||||	gaCCACCTGCCTCGGCCTCCCAAAGTg	>hsa_piR_022437|gb|DQ600690|Homo	NM_001135707.3	217	-57.25	2	26	1296	1322	24	0.9167	1	||||||||||	|:|||||:||
1988	uaGGUGGGCGGAGUCGGAGGGUUUCAu	|| ||| |||||||||||||||||	atCCTCCCACCTCAGCCTCCCAAAGTg	>hsa_piR_022437|gb|DQ600690|Homo	NM_001135745.2	209	-51.6	2	26	2010	2036	24	0.9167	0.9167	||||||||||	|| |||||||
1989	uaGGUGGGCGGAGUCGGAGGGUUUCAu	|||||||:|||:||||||||||||	atCCACCCGTCTCGGCCTCCCAAAGTg	>hsa_piR_022437|gb|DQ600690|Homo	NM_001135750.2	217	-58.89	2	26	3661	3687	24	0.9167	1	||||||||||	|||:|||:||
1990	uagGUGGGCGGAGUCGGAGGGUUUCAu	| :|:||||::||||||||||||	ataCTTCTGCCTTGGCCTCCCAAAGTg	>hsa_piR_022437|gb|DQ600690|Homo	NM_001135768.3	196	-42.4	2	25	1990	2016	23	0.7826	0.9565	||||||||||	|:||||::||
1991	uagGUGGGCGGAGUCGGAGGGUUUCAu	| :|:||||::||||||||||||	ataCTTCTGCCTTGGCCTCCCAAAGTg	>hsa_piR_022437|gb|DQ600690|Homo	NM_001135769.3	196	-42.4	2	25	1966	1992	23	0.7826	0.9565	||||||||||	|:||||::||
1992	uaGGUGGGCGGAGUCGGAGGGUUUCAu	||||||||||::||||||||||||	atCCACCCGCCTTGGCCTCCCAAAGTg	>hsa_piR_022437|gb|DQ600690|Homo	NM_001135863.2	217	-56.9	2	26	1746	1772	24	0.9167	1	||||||||||	||||||::||
1993	uaGGUGGGCGGAGUCGGAGGGUUUCAu	||||||||||::||||||||||||	atCCACCCGCCTTGGCCTCCCAAAGTg	>hsa_piR_022437|gb|DQ600690|Homo	NM_001135864.1	217	-56.9	2	26	1740	1766	24	0.9167	1	||||||||||	||||||::||
1994	uaGGUGGGCGGAGUCGGAGGGUUUCAu	|||||:||||||||||||||||||	acCCACCTGCCTCAGCCTCCCAAAGTg	>hsa_piR_022437|gb|DQ600690|Homo	NM_001136134.1	221	-56.91	2	26	2762	2788	24	0.9583	1	||||||||||	|:||||||||
1995	uaGGUGGGCGGAGUCGGAGGGUUUCAu	|::||||||||:||||||||||||	atCTGCCCGCCTCGGCCTCCCAAAGTg	>hsa_piR_022437|gb|DQ600690|Homo	NM_001136219.3	213	-56.02	2	26	1679	1705	24	0.875	1	||||||||||	|||||||:||
1996	uaGGUGGGCGGAGUCGGAGGGUUUCAu	|||||:|||||:||||||||||||	atCCACCTGCCTCGGCCTCCCAAAGTg	>hsa_piR_022437|gb|DQ600690|Homo	NM_001136230.3	217	-58.38	2	26	1966	1992	24	0.9167	1	||||||||||	|:|||||:||
1997	uaGGUGGGCGGAGUCGGAGGGUUUCAu	|||||:|||||:||||||||||||	atCCACCTGCCTCGGCCTCCCAAAGTg	>hsa_piR_022437|gb|DQ600690|Homo	NM_001136483.3	217	-58.38	2	26	3347	3373	24	0.9167	1	||||||||||	|:|||||:||
1998	uaGGUGGGCGGAGUCGGAGGGUUUCAu	:||:::|||||:||||||||||||	atTCATTTGCCTCGGCCTCCCAAAGTg	>hsa_piR_022437|gb|DQ600690|Homo	NM_001136497.2	205	-50.81	2	26	2859	2885	24	0.7917	1	||||||||||	::|||||:||
1999	uaGGUGGGCGGAGUCGGAGGGUUUCAu	|||||:||||||||||||||||||	atCCACCTGCCTCAGCCTCCCAAAGTg	>hsa_piR_022437|gb|DQ600690|Homo	NM_001136501.3	221	-59.03	2	26	4112	4138	24	0.9583	1	||||||||||	|:||||||||
2000	uaGGUGGGCGGAGUCGGAGGGUUUCAu	|||||:||||:|||||||||||||	atCCACCTGCCTTAGCCTCCCAAAGTg	>hsa_piR_022437|gb|DQ600690|Homo	NM_001136501.3	217	-56.56	2	26	3389	3415	24	0.9167	1	||||||||||	|:||||:|||
2001	uaGGUGGGCGGAGUCGGAGGGUUUCAu	|::||||||||||:||||||||||	atCTGCCCGCCTCAGTCTCCCAAAGTg	>hsa_piR_022437|gb|DQ600690|Homo	NM_001136501.3	213	-54.38	2	26	3091	3117	24	0.875	1	||||||||||	|||||||||:
2002	uaGGUGGGCGGAGUCGGAGGGUUUCAu	|:|||| |||:| |||||||||||	atCTACCCACCTTACCCTCCCAAAGTg	>hsa_piR_022437|gb|DQ600690|Homo	NM_001136538.2	201	-44.54	2	26	945	971	24	0.8333	0.9167	||||||||||	|| |||:| |
2003	uaGGUGGGCGGAGUCGGAGGGUUUCAu	|::||| |||::||||||||||||	atCTGCCCACCTTGGCCTCCCAAAGTg	>hsa_piR_022437|gb|DQ600690|Homo	NM_001136540.1	201	-45.9	2	26	1699	1725	24	0.7917	0.9583	||||||||||	|| |||::||
2004	uaGGUGGGCGGAGUCGGAGGGUUUCAu	|::||| |||::||||||||||||	atCTGCCCACCTTGGCCTCCCAAAGTg	>hsa_piR_022437|gb|DQ600690|Homo	NM_001136541.1	201	-45.9	2	26	1606	1632	24	0.7917	0.9583	||||||||||	|| |||::||
2005	uagGUGGGCGGAGUCGGAGGGUUUCAu	|||||||||::||||||||||||	atgCACCCGCCTTGGCCTCCCAAAGTg	>hsa_piR_022437|gb|DQ600690|Homo	NM_001137554.2	212	-52.11	2	25	5871	5897	23	0.913	1	||||||||||	||||||::||
2006	uaGGUGGGCGGAGUCGGAGGGUUUCAu	||::|| |||| ||||||||||||	atCCGTCCCCCTCTGCCTCCCAAAGTg	>hsa_piR_022437|gb|DQ600690|Homo	NM_001137554.2	201	-47.54	2	26	1605	1631	24	0.8333	0.9167	||||||||||	|| |||| ||
2007	uaggugggcggAGUCGGAGGGUUUCAu	|||||||||||||||	gcctcaagtgaTCAGCCTCCCAAAGTg	>hsa_piR_022437|gb|DQ600690|Homo	NM_001137554.2	180	-38.63	2	17	1712	1738	15	1	1	||||||||||	|||||
2008	uaGGUGGGCGGAGUCGGAGGGUUUCAu	|::||:|||||:||||||||||||	atCTGCCTGCCTCGGCCTCCCAAAGTg	>hsa_piR_022437|gb|DQ600690|Homo	NM_001137602.3	209	-53.22	2	26	6491	6517	24	0.8333	1	||||||||||	|:|||||:||
2009	uaGGUGGGCGGAGUCGGAGGGUUUCAu	||:||:|||||:||||||||||||	atCCGCCTGCCTCGGCCTCCCAAAGTg	>hsa_piR_022437|gb|DQ600690|Homo	NM_001139490.1	213	-57.91	2	26	3411	3437	24	0.875	1	||||||||||	|:|||||:||
2010	uaGGUGGGCGGAGUC--GGAGGGUUUCAu	:::||| |||::| |||||||||||	tcTTGCCCACCTTGGGACCTCCCAAAGTg	>hsa_piR_022437|gb|DQ600690|Homo	NM_001139498.2	184	-36.18	2	26	9060	9088	26	0.6923	0.8846	||||||||||	|||::| |
2011	uaGGUGGGCGGAGUCGGAGGGUUUCAu	|||||:||||||||||||||||||	atCCACCTGCCTCAGCCTCCCAAAGTg	>hsa_piR_022437|gb|DQ600690|Homo	NM_001139499.2	221	-59.03	2	26	2087	2113	24	0.9583	1	||||||||||	|:||||||||
2012	uaGGUGGGCGGAGUC--GGAGGGUUUCAu	:::||| |||::| |||||||||||	tcTTGCCCACCTTGGGACCTCCCAAAGTg	>hsa_piR_022437|gb|DQ600690|Homo	NM_001139500.2	184	-36.18	2	26	9228	9256	26	0.6923	0.8846	||||||||||	|||::| |
2013	uaGGUGGGCGGAGUC--GGAGGGUUUCAu	:::||| |||::| |||||||||||	tcTTGCCCACCTTGGGACCTCCCAAAGTg	>hsa_piR_022437|gb|DQ600690|Homo	NM_001139501.2	184	-36.18	2	26	9338	9366	26	0.6923	0.8846	||||||||||	|||::| |
2014	uaGGUGGGCGGAGUC--GGAGGGUUUCAu	:::||| |||::| |||||||||||	tcTTGCCCACCTTGGGACCTCCCAAAGTg	>hsa_piR_022437|gb|DQ600690|Homo	NM_001139502.2	184	-36.18	2	26	8981	9009	26	0.6923	0.8846	||||||||||	|||::| |
2015	uaGGUGGGCGGAGUCGGAGGGUUUCAu	||:||||||||:||||||||||||	atCCGCCCGCCTCGGCCTCCCAAAGTg	>hsa_piR_022437|gb|DQ600690|Homo	NM_001141979.3	217	-60.71	2	26	7606	7632	24	0.9167	1	||||||||||	|||||||:||
2016	uaGGUGGGCGGAGUCGGAGGGUUUCAu	||:||||||||:||||||||||||	atCCGCCCGCCTCGGCCTCCCAAAGTg	>hsa_piR_022437|gb|DQ600690|Homo	NM_001141980.3	217	-60.71	2	26	7612	7638	24	0.9167	1	||||||||||	|||||||:||
2017	uaGGUGGGCGGAGUCGGAGGGUUUCAu	|||||||| |:|||||||||||||	atCCACCCGCATTAGCCTCCCAAAGTg	>hsa_piR_022437|gb|DQ600690|Homo	NM_001142269.4	213	-52.15	2	26	5610	5636	24	0.9167	0.9583	||||||||||	|||| |:|||
2018	uaGGUGGGCGGAGUCGGAGGGUUUCAu	|::| :||||::||||||||||||	atCTGCATGCCTTGGCCTCCCAAAGTg	>hsa_piR_022437|gb|DQ600690|Homo	NM_001142269.4	197	-43.17	2	26	5878	5904	24	0.75	0.9583	||||||||||	:||||::||
2019	uaGGUGGGCGGAGUCGGAGGGUUUCAu	||:||| |||||||||||||||||	atCCGCCCACCTCAGCCTCCCAAAGTg	>hsa_piR_022437|gb|DQ600690|Homo	NM_001142281.1	213	-55.52	2	26	2020	2046	24	0.9167	0.9583	||||||||||	|| |||||||
2020	uaGGUGGGCGGAGUCGGAGGGUUUCAu	|::||:||||||||||||||||||	atCTGCCTGCCTCAGCCTCCCAAAGTg	>hsa_piR_022437|gb|DQ600690|Homo	NM_001142301.1	213	-53.87	2	26	303	329	24	0.875	1	||||||||||	|:||||||||
2021	uaGGUGGGCGGAGUCGGAGGGUUUCAu	|||| |||||::|:||||||||||	atCCACACGCCTTGGTCTCCCAAAGTg	>hsa_piR_022437|gb|DQ600690|Homo	NM_001142314.2	205	-47.18	2	26	3164	3190	24	0.8333	0.9583	||||||||||	|||||::|:
2022	uaGGUGGGCGGAGUCGGAGGGUUUCAu	||||||||||||||||||||||||	atCCACCCGCCTCAGCCTCCCAAAGTg	>hsa_piR_022437|gb|DQ600690|Homo	NM_001142339.3	225	-61.83	2	26	4157	4183	24	1	1	||||||||||	||||||||||
2023	uaGGUGGGCGGAGUCGGAGGGUUUCAu	|::||:|||||:||||||||||||	atCTGCCTGCCTCGGCCTCCCAAAGTg	>hsa_piR_022437|gb|DQ600690|Homo	NM_001142351.2	209	-53.22	2	26	3780	3806	24	0.8333	1	||||||||||	|:|||||:||
2024	uaGGUGGGCGGAGUCGGAGGGUUUCAu	|| ||:||||||||||||||||||	atCCTCCTGCCTCAGCCTCCCAAAGTg	>hsa_piR_022437|gb|DQ600690|Homo	NM_001142370.2	213	-54.64	2	26	2297	2323	24	0.9167	0.9583	||||||||||	|:||||||||
2025	uaGGUGGGCGGAGUCGGAGGGUUUCAu	||||| |:||||||||||||||||	atCCACCAGTCTCAGCCTCCCAAAGTt	>hsa_piR_022437|gb|DQ600690|Homo	NM_001142386.3	213	-50.57	2	26	5942	5968	24	0.9167	0.9583	||||||||||	| |:||||||
2026	uaGGUGGGCGGAGUCGGAGGGUUUCAu	||:||:|||| :||||||||||||	atCCGCCTGCCT-GGCCTCCCAAAGTg	>hsa_piR_022437|gb|DQ600690|Homo	NM_001142523.2	199	-50.76	2	26	2927	2952	24	0.8333	0.9583	||||||||||	|:|||| :||
2027	uaGGUGGGCGGAGUCGGAGGGUUUCAu	|::||| |||||||||||||||||	atCTGCCCACCTCAGCCTCCCAAAGTg	>hsa_piR_022437|gb|DQ600690|Homo	NM_001142564.2	209	-50.83	2	26	310	336	24	0.875	0.9583	||||||||||	|| |||||||
2028	uaGGUGGGCGGAGUCGGAGGGUUUCAu	:||||:||||| ||||||||||||	atTCACCTGCCTCTGCCTCCCAAAGTg	>hsa_piR_022437|gb|DQ600690|Homo	NM_001142571.2	209	-51.86	2	26	6884	6910	24	0.875	0.9583	||||||||||	|:||||| ||
2029	uaGGUGGGCGGAGUCGGAGGGUUUCAu	|:||||||||:: |||||||||||	atCTACCCGCCTTGACCTCCCAAAGTg	>hsa_piR_022437|gb|DQ600690|Homo	NM_001142571.2	205	-50.17	2	26	5506	5532	24	0.8333	0.9583	||||||||||	||||||:: |
2030	uaGGUGGGCGGAGUCGGAGGGUUUCAu	|||||| ||||:||||||||||||	atCCACCCACCTCGGCCTCCCAAAGTg	>hsa_piR_022437|gb|DQ600690|Homo	NM_001142590.2	213	-55.34	2	26	248	274	24	0.9167	0.9583	||||||||||	|| ||||:||
2031	uaGGUGGGCGGAGUCGGAGGGUUUCAu	|| |:: |||::||||||||||||	atCCTCTTTCCTTGGCCTCCCAAAGTa	>hsa_piR_022437|gb|DQ600690|Homo	NM_001142595.1	193	-40.71	2	26	264	290	24	0.75	0.9167	||||||||||	:: |||::||
2032	uaGGUGGGCGGAGUCGGAGGGUUUCAu	||:||||||||:||||||||||||	atCCGCCCGCCTCGGCCTCCCAAAGTg	>hsa_piR_022437|gb|DQ600690|Homo	NM_001142598.2	217	-60.71	2	26	3539	3565	24	0.9167	1	||||||||||	|||||||:||
2033	uaGGUGGGCGGAGUCGGAGGGUUUCAu	||:||||||||:||||||||||||	atCCGCCCGCCTCGGCCTCCCAAAGTg	>hsa_piR_022437|gb|DQ600690|Homo	NM_001142599.2	217	-60.71	2	26	3545	3571	24	0.9167	1	||||||||||	|||||||:||
2034	uaGGUGGGCGGAGUCGGAGGGUUUCAu	|::||:|||||:||||||||||||	atCTGCCTGCCTCGGCCTCCCAAAGTg	>hsa_piR_022437|gb|DQ600690|Homo	NM_001142621.3	209	-53.22	2	26	4842	4868	24	0.8333	1	||||||||||	|:|||||:||
2035	uaGGUGGGCGGAGUCGGAGGGUUUCAu	|||||| |||||||||||||||||	atCCACCCACCTCAGCCTCCCAAAGTg	>hsa_piR_022437|gb|DQ600690|Homo	NM_001142653.2	217	-55.99	2	26	1238	1264	24	0.9583	0.9583	||||||||||	|| |||||||
2036	uaGGUGGGCGGAGUCGGAGGGUUUCAu	|||||| |||||||||||||||||	atCCACCCACCTCAGCCTCCCAAAGTg	>hsa_piR_022437|gb|DQ600690|Homo	NM_001142654.2	217	-55.99	2	26	1223	1249	24	0.9583	0.9583	||||||||||	|| |||||||
2037	uaGGUGGGCGGAGUCGGAGGGUUUCAu	|:::||||||||||||||||||||	atCTGTCCGCCTCAGCCTCCCAAAGTg	>hsa_piR_022437|gb|DQ600690|Homo	NM_001143821.3	213	-55.04	2	26	4128	4154	24	0.875	1	||||||||||	||||||||||
2038	uaGGUGGGCGGAGUCGGAGGGUUUCAu	||:||| ||||:||||||||||||	atCCGCCCACCTCGGCCTCCCAAAGTg	>hsa_piR_022437|gb|DQ600690|Homo	NM_001143821.3	209	-54.87	2	26	5120	5146	24	0.875	0.9583	||||||||||	|| ||||:||
2039	uaGGUGGGCGGAGUCGGAGGGUUUCAu	|::||||||||| :||||||||||	ctCTGCCCGCCTCAATCTCCCAAAGTg	>hsa_piR_022437|gb|DQ600690|Homo	NM_001143821.3	205	-48.09	2	26	5889	5915	24	0.8333	0.9583	||||||||||	|||||||| :
2040	uaGGUGGGCGGAGUCGGAGGGUUUCAu	|| |||||||::||||||||||||	atCCTCCCGCCTTGGCCTCCCAAAGTg	>hsa_piR_022437|gb|DQ600690|Homo	NM_001143828.2	209	-52.51	2	26	2652	2678	24	0.875	0.9583	||||||||||	||||||::||
2041	uaGGUGGGCGGAGUCGGAGGGUUUCAu	|::||| ||||:||||||||||||	atCTGCCCACCTCGGCCTCCCAAAGTg	>hsa_piR_022437|gb|DQ600690|Homo	NM_001143850.3	205	-50.18	2	26	2738	2764	24	0.8333	0.9583	||||||||||	|| ||||:||
2042	uaGGUGGGCGGAGUCGGAGGGUUUCAu	||:||| :||::||||||||||||	atCCGCCCATCTTGGCCTCCCAAAGTg	>hsa_piR_022437|gb|DQ600690|Homo	NM_001143850.3	201	-48.58	2	26	2453	2479	24	0.7917	0.9583	||||||||||	|| :||::||
2043	uaGGUGGGCGGAGUCGGAGGGUUUCAu	|::|| |||||:||||||||||||	atCTGCCGGCCTCGGCCTCCCAAAGTg	>hsa_piR_022437|gb|DQ600690|Homo	NM_001143936.2	205	-50.9	2	26	3707	3733	24	0.8333	0.9583	||||||||||	| |||||:||
2044	uaGGUGGGCGGAGUCGGAGGGUUUCAu	|||:|:||||::||||||||||||	atCCATCTGCCTTGGCCTCCCAAAGTg	>hsa_piR_022437|gb|DQ600690|Homo	NM_001143938.3	209	-51.75	2	26	3847	3873	24	0.8333	1	||||||||||	|:||||::||
2045	uaGGUGGGCGGAGUCGGAGGGUUUCAu	|||:|:||||::||||||||||||	atCCATCTGCCTTGGCCTCCCAAAGTg	>hsa_piR_022437|gb|DQ600690|Homo	NM_001143939.3	209	-51.75	2	26	3886	3912	24	0.8333	1	||||||||||	|:||||::||
2046	uaGGUGGGCGGAGUCGGAGGGUUUCAu	| :||:||||::||||||||||||	atCAGCCTGCCTTGGCCTCCCAAAGTg	>hsa_piR_022437|gb|DQ600690|Homo	NM_001143940.1	201	-46.57	2	26	3301	3327	24	0.7917	0.9583	||||||||||	|:||||::||
2047	uaGGUGGGCGGAGUCGGAGGGUUUCAu	|| |||||||||||||||||||||	atCCTCCCGCCTCAGCCTCCCAAAGTt	>hsa_piR_022437|gb|DQ600690|Homo	NM_001143943.1	217	-56.03	2	26	686	712	24	0.9583	0.9583	||||||||||	||||||||||
2048	uaGGUGGGCGGAGUCGGAGGGUUUCAu	|| |||||||::||||||||||||	atCCTCCCGCCTTGGCCTCCCAAAGTg	>hsa_piR_022437|gb|DQ600690|Homo	NM_001143943.1	209	-52.51	2	26	2557	2583	24	0.875	0.9583	||||||||||	||||||::||
2049	uaGGUGGGCGGAGUCGGAGGGUUUCAu	|| || |||||||||||||||||	atCCTGCCACCTCAGCCTCCCAAAGTg	>hsa_piR_022437|gb|DQ600690|Homo	NM_001143943.1	201	-47.69	2	26	1246	1272	24	0.875	0.875	||||||||||	|| |||||||
2050	uaGGUGGGCGGAGUCGGAGGGUUUCAu	|||||:||||::||||||||||||	atCCACCTGCCTTGGCCTCCCAAAGTa	>hsa_piR_022437|gb|DQ600690|Homo	NM_001144000.2	213	-54.2	2	26	1960	1986	24	0.875	1	||||||||||	|:||||::||
2051	uaGGUGGGCGGAGUCGGAGGGUUUCAu	||:||:||||||||||||||||||	atCCGCCTGCCTCAGCCTCCCAAAGTg	>hsa_piR_022437|gb|DQ600690|Homo	NM_001144068.2	217	-58.56	2	26	4736	4762	24	0.9167	1	||||||||||	|:||||||||
2052	uaGGUGGGCGGAGUCGGAGGGUUUCAu	|||||| ||||:||||||||||||	atCCACCCACCTCGGCCTCCCAAAGTg	>hsa_piR_022437|gb|DQ600690|Homo	NM_001144756.1	213	-55.34	2	26	166	192	24	0.9167	0.9583	||||||||||	|| ||||:||
2053	uaGGUGGGCGGAGUCGGAGGGUUUCAu	|||||| ||||:||||||||||||	atCCACCCACCTCGGCCTCCCAAAGTg	>hsa_piR_022437|gb|DQ600690|Homo	NM_001144824.2	213	-55.34	2	26	2659	2685	24	0.9167	0.9583	||||||||||	|| ||||:||
2054	uaGGUGGGCGGAGUCGGAGGGUUUCAu	|||||||||||:||||||||||||	atCCACCCGCCTCGGCCTCCCAAAGTg	>hsa_piR_022437|gb|DQ600690|Homo	NM_001144877.3	221	-61.18	2	26	9385	9411	24	0.9583	1	||||||||||	|||||||:||
2055	uaGGUGGGCGGAGUCGGAGGGUUUCAu	|::||:||||||||||||||||||	atCTGCCTGCCTCAGCCTCCCAAAGTg	>hsa_piR_022437|gb|DQ600690|Homo	NM_001144877.3	213	-53.87	2	26	3434	3460	24	0.875	1	||||||||||	|:||||||||
2056	uaGGUGGGCGGAGUCGGAGGGUUUCAu	|| ||:|||||| |||||||||||	atCCTCCTGCCTCAACCTCCCAAAGTg	>hsa_piR_022437|gb|DQ600690|Homo	NM_001144877.3	205	-48.37	2	26	3892	3918	24	0.875	0.9167	||||||||||	|:|||||| |
2057	uaGGUGGGCGGAGUCGGAGGGUUUCAu	||::: |||||:||||||||||||	atCCGTTGGCCTCGGCCTCCCAAAGTg	>hsa_piR_022437|gb|DQ600690|Homo	NM_001144877.3	201	-50.82	2	26	5582	5608	24	0.7917	0.9583	||||||||||	: |||||:||
2058	uaGGUGGGCGGAGUCGGAGGGUUUCAu	||| | |||::||||||||||||	ttCCAGGCCCCTTGGCCTCCCAAAGTg	>hsa_piR_022437|gb|DQ600690|Homo	NM_001144878.1	193	-41.08	2	26	2802	2828	24	0.7917	0.875	||||||||||	| |||::||
2059	uaGGUGGGCGGAGUCGGAGGGUUUCAu	||| | |||::||||||||||||	ttCCAGGCCCCTTGGCCTCCCAAAGTg	>hsa_piR_022437|gb|DQ600690|Homo	NM_001144879.1	193	-41.08	2	26	2492	2518	24	0.7917	0.875	||||||||||	| |||::||
2060	uaGGUGGGCGGAGUCGGAGGGUUUCAu	|||||:||||||||||||||||||	atCCACCTGCCTCAGCCTCCCAAAGTg	>hsa_piR_022437|gb|DQ600690|Homo	NM_001144881.2	221	-59.03	2	26	5640	5666	24	0.9583	1	||||||||||	|:||||||||
2061	uaGGUGGGCGGAGUCGGAGGGUUUCAu	|||||:||||||||||||||||||	atCCACCTGCCTCAGCCTCCCAAAGTg	>hsa_piR_022437|gb|DQ600690|Homo	NM_001144882.2	221	-59.03	2	26	5653	5679	24	0.9583	1	||||||||||	|:||||||||
2062	uaGGUGGGCGGAGUCGGAGGGUUUCAu	|||||:||||||||||||||||||	atCCACCTGCCTCAGCCTCCCAAAGTg	>hsa_piR_022437|gb|DQ600690|Homo	NM_001144883.2	221	-59.03	2	26	5650	5676	24	0.9583	1	||||||||||	|:||||||||
2063	uaGGUGGGCGGAGUCGGAGGGUUUCAu	||::|| |||||||||||||||||	atCCGTCCACCTCAGCCTCCCAAAGTg	>hsa_piR_022437|gb|DQ600690|Homo	NM_001144884.2	209	-52.75	2	26	1896	1922	24	0.875	0.9583	||||||||||	|| |||||||
2064	uaGGUGGGCGGAGUCGGAGGGUUUCAu	|| ||:|||||:||||||||||||	atCCTCCTGCCTCGGCCTCCCAAAGTg	>hsa_piR_022437|gb|DQ600690|Homo	NM_001144884.2	209	-53.99	2	26	4124	4150	24	0.875	0.9583	||||||||||	|:|||||:||
2065	uaGGUGGGCGGAGUCGGAGGGUUUCAu	:|:|||||| |: |||||||||||	atTCGCCCGCCGCGTCCTCCCAAAGTg	>hsa_piR_022437|gb|DQ600690|Homo	NM_001144893.2	197	-47.77	2	26	2619	2645	24	0.7917	0.9167	||||||||||	||||| |: |
2066	uaGGUGGGCGGAGUCGGAGGGUUUCAu	:|:|||||| |: |||||||||||	atTCGCCCGCCGCGTCCTCCCAAAGTg	>hsa_piR_022437|gb|DQ600690|Homo	NM_001144894.2	197	-47.77	2	26	2895	2921	24	0.7917	0.9167	||||||||||	||||| |: |
2067	uaGGUGGGCGGAGUCGGAGGGUUUCAu	:|:|||||| |: |||||||||||	atTCGCCCGCCGCGTCCTCCCAAAGTg	>hsa_piR_022437|gb|DQ600690|Homo	NM_001144895.2	197	-47.77	2	26	2751	2777	24	0.7917	0.9167	||||||||||	||||| |: |
2068	uaGGUGGGCGGAGUCGGAGGGUUUCAu	:|:|||||| |: |||||||||||	atTCGCCCGCCGCGTCCTCCCAAAGTg	>hsa_piR_022437|gb|DQ600690|Homo	NM_001144896.2	197	-47.77	2	26	2955	2981	24	0.7917	0.9167	||||||||||	||||| |: |
2069	uaGGUGGGCGGAGUCGGAGGGUUUCAu	:|:|||||| |: |||||||||||	atTCGCCCGCCGCGTCCTCCCAAAGTg	>hsa_piR_022437|gb|DQ600690|Homo	NM_001144897.2	197	-47.77	2	26	3009	3035	24	0.7917	0.9167	||||||||||	||||| |: |
2070	uaGGUGGGCGGAGUCGGAGGGUUUCAu	:|:|||||| |: |||||||||||	atTCGCCCGCCGCGTCCTCCCAAAGTg	>hsa_piR_022437|gb|DQ600690|Homo	NM_001144899.2	197	-47.77	2	26	2544	2570	24	0.7917	0.9167	||||||||||	||||| |: |
2071	uaGGUGGGCGGAGUCGGAGGGUUUCAu	||:||||:||||||||||||||||	atCCGCCCGTCTCAGCCTCCCAAAGTg	>hsa_piR_022437|gb|DQ600690|Homo	NM_001144920.2	217	-59.07	2	26	2697	2723	24	0.9167	1	||||||||||	|||:||||||
2072	uaGGUGGGCGGAGUCGGAGGGUUUCAu	||:||||:||||||||||||||||	atCCGCCCGTCTCAGCCTCCCAAAGTg	>hsa_piR_022437|gb|DQ600690|Homo	NM_001144923.3	217	-59.07	2	26	2704	2730	24	0.9167	1	||||||||||	|||:||||||
2073	uaGGUGGGCGGAGUCGGAGGGUUUCAu	||:||:||||::||||||||||||	atCCGCCTGCCTTGGCCTCCCAAAGTg	>hsa_piR_022437|gb|DQ600690|Homo	NM_001144989.2	209	-53.63	2	26	5606	5632	24	0.8333	1	||||||||||	|:||||::||
2074	uaGGUGGGCGGAGUCGGAGGGUUUCAu	|::|: ||||||||||||||||||	atCTGCTGGCCTCAGCCTCCCAAAGTc	>hsa_piR_022437|gb|DQ600690|Homo	NM_001144989.2	205	-46.41	2	26	4865	4891	24	0.8333	0.9583	||||||||||	: ||||||||
2075	uaGGUGGGCGGAGUCGGAGGGUUUCAu	:| ||:||||| ||||||||||||	atTCTCCTGCCTCCGCCTCCCAAAGTg	>hsa_piR_022437|gb|DQ600690|Homo	NM_001144995.2	201	-46.4	2	26	9399	9425	24	0.8333	0.9167	||||||||||	|:||||| ||
2076	uaggUGGGCGGAGUCGGAGGGUUUCAu	:| :||||::||||||||||||	caaaGCATGCCTTGGCCTCCCAAAGTg	>hsa_piR_022437|gb|DQ600690|Homo	NM_001144995.2	191	-38.98	2	24	11114	11140	22	0.7727	0.9545	||||||||||	:||||::||
2077	uaGGUGGGCGGAGUCGGAGGGUUUCAu	|:|||:||||||||||||||||||	atCTACCTGCCTCAGCCTCCCAAAGTg	>hsa_piR_022437|gb|DQ600690|Homo	NM_001145004.2	217	-56.32	2	26	3561	3587	24	0.9167	1	||||||||||	|:||||||||
2078	uaGGUGGGCGGAGUCGGAGGGUUUCAu	|||||| ||||:|:||||||||||	atCCACCCACCTCGGTCTCCCAAAGTg	>hsa_piR_022437|gb|DQ600690|Homo	NM_001145008.2	209	-53.05	2	26	2947	2973	24	0.875	0.9583	||||||||||	|| ||||:|:
2079	uaGGUGGGCGGAGUCGGAGGGUUUCAu	|||||| ||||:|:||||||||||	atCCACCCACCTCGGTCTCCCAAAGTg	>hsa_piR_022437|gb|DQ600690|Homo	NM_001145009.2	209	-53.05	2	26	3860	3886	24	0.875	0.9583	||||||||||	|| ||||:|:
2080	uaGGUGGGCGGAGUCGGAGGGUUUCAu	||:||| |||::||||||||||||	atCCGCCCACCTTGGCCTCCCAAAGTg	>hsa_piR_022437|gb|DQ600690|Homo	NM_001145064.3	205	-50.59	2	26	6155	6181	24	0.8333	0.9583	||||||||||	|| |||::||
2081	uaGGUGGGCGGAGUCGGAGGGUUUCAu	|||||:||||||||||||||||||	atCCACCTGCCTCAGCCTCCCAAAGTg	>hsa_piR_022437|gb|DQ600690|Homo	NM_001145078.2	221	-59.03	2	26	5261	5287	24	0.9583	1	||||||||||	|:||||||||
2082	uaGGUGGGCGGAGUCGGAGGGUUUCAu	|::||| |||||||||||||||||	atCTGCCCACCTCAGCCTCCCAAAGTg	>hsa_piR_022437|gb|DQ600690|Homo	NM_001145078.2	209	-50.83	2	26	5556	5582	24	0.875	0.9583	||||||||||	|| |||||||
2083	uaGGUGGGCGGAGUCGGAGGGUUUCAu	|| ||| |:|||||||||||||||	atCCTCCCACTTCAGCCTCCCAAAGTg	>hsa_piR_022437|gb|DQ600690|Homo	NM_001145082.3	205	-48.66	2	26	3405	3431	24	0.875	0.9167	||||||||||	|| |:|||||
2084	uaGGUGGGCGGAGUCGGAGGGUUUCAu	|| ||| |:|||||||||||||||	atCCTCCCACTTCAGCCTCCCAAAGTg	>hsa_piR_022437|gb|DQ600690|Homo	NM_001145083.2	205	-48.66	2	26	3131	3157	24	0.875	0.9167	||||||||||	|| |:|||||
2085	uaGGUGGGCGGAGUCGGAGGGUUUCAu	|| ||| |:|||||||||||||||	atCCTCCCACTTCAGCCTCCCAAAGTg	>hsa_piR_022437|gb|DQ600690|Homo	NM_001145093.4	205	-48.66	2	26	3276	3302	24	0.875	0.9167	||||||||||	|| |:|||||
2086	uaGGUGGGCGGAGUCGGAGGGUUUCAu	|| ||| |:|||||||||||||||	atCCTCCCACTTCAGCCTCCCAAAGTg	>hsa_piR_022437|gb|DQ600690|Homo	NM_001145094.2	205	-48.66	2	26	3356	3382	24	0.875	0.9167	||||||||||	|| |:|||||
2087	uaGGUGGGCGGAGUCGGAGGGUUUCAu	||||||||||::||||||||||||	atCCACCCGCCTTGGCCTCCCAAAGTg	>hsa_piR_022437|gb|DQ600690|Homo	NM_001145115.3	217	-56.9	2	26	2994	3020	24	0.9167	1	||||||||||	||||||::||
2088	uaGGUGGGCGGAGUCGGAGGGUUUCAu	|||||:|:|||:||||||||||||	atCCACCTGTCTCGGCCTCCCAAAGTg	>hsa_piR_022437|gb|DQ600690|Homo	NM_001145205.2	213	-56.09	2	26	2648	2674	24	0.875	1	||||||||||	|:|:|||:||
2089	uaGGUGGGCGGAGUCGGAGGGUUUCAu	|:| |:||||||||||||||||||	ttCTA-CTGCCTCAGCCTCCCAAAGTg	>hsa_piR_022437|gb|DQ600690|Homo	NM_001145206.1	203	-47.91	2	26	9722	9747	24	0.875	0.9583	||||||||||	|:||||||||
2090	uagguGGGCGGAGUCGGAGGGUUUCAu	||| |||||||||||||||||	attgtCCCTCCTCAGCCTCCCAAAGTg	>hsa_piR_022437|gb|DQ600690|Homo	NM_001145206.1	202	-45.52	2	23	7361	7387	21	0.9524	0.9524	||||||||||	|| |||||||
2091	uaGGUGGGCGGAGUCGGAGGGUUUCAu	:||||||||||:||||||||||||	gaTCACCCGCCTCGGCCTCCCAAAGTg	>hsa_piR_022437|gb|DQ600690|Homo	NM_001145256.1	217	-57.36	2	26	3431	3457	24	0.9167	1	||||||||||	|||||||:||
2092	uaGGUGGGCGGAGUCGGAGGGUUUCAu	:||||||||||:||||||||||||	gaTCACCCGCCTCGGCCTCCCAAAGTg	>hsa_piR_022437|gb|DQ600690|Homo	NM_001145257.1	217	-57.36	2	26	3383	3409	24	0.9167	1	||||||||||	|||||||:||
2093	uaGGUGGGCGGAGUCGGAGGGUUUCAu	:||||||||||:||||||||||||	gaTCACCCGCCTCGGCCTCCCAAAGTg	>hsa_piR_022437|gb|DQ600690|Homo	NM_001145258.1	217	-57.36	2	26	3213	3239	24	0.9167	1	||||||||||	|||||||:||
2094	uaGGUGGGCGGAGUCGGAGGGUUUCAu	||:||||||||:||||||||||||	atCCGCCCGCCTCGGCCTCCCAAAGTg	>hsa_piR_022437|gb|DQ600690|Homo	NM_001145279.4	217	-60.71	2	26	9325	9351	24	0.9167	1	||||||||||	|||||||:||
2095	uaGGUGGGCGGAGUCGGAGGGUUUCAu	|::||:|||||:||||||||||||	atCTGCCTGCCTCGGCCTCCCAAAGTg	>hsa_piR_022437|gb|DQ600690|Homo	NM_001145279.4	209	-53.22	2	26	13691	13717	24	0.8333	1	||||||||||	|:|||||:||
2096	uaGGUGGGCGGAGUCGGAGGGUUUCAu	||:||||||||:||||||||||||	atCCGCCCGCCTCGGCCTCCCAAAGTg	>hsa_piR_022437|gb|DQ600690|Homo	NM_001145280.4	217	-60.71	2	26	8756	8782	24	0.9167	1	||||||||||	|||||||:||
2097	uaGGUGGGCGGAGUCGGAGGGUUUCAu	|::||:|||||:||||||||||||	atCTGCCTGCCTCGGCCTCCCAAAGTg	>hsa_piR_022437|gb|DQ600690|Homo	NM_001145280.4	209	-53.22	2	26	13122	13148	24	0.8333	1	||||||||||	|:|||||:||
2098	uaGGUGGGCGGAGUCGGAGGGUUUCAu	||:||||||||:||||||||||||	atCCGCCCGCCTCGGCCTCCCAAAGTg	>hsa_piR_022437|gb|DQ600690|Homo	NM_001145281.3	217	-60.71	2	26	8297	8323	24	0.9167	1	||||||||||	|||||||:||
2099	uaGGUGGGCGGAGUCGGAGGGUUUCAu	|::||:|||||:||||||||||||	atCTGCCTGCCTCGGCCTCCCAAAGTg	>hsa_piR_022437|gb|DQ600690|Homo	NM_001145281.3	209	-53.22	2	26	12663	12689	24	0.8333	1	||||||||||	|:|||||:||
2100	uaGGUGGGCGGAGUCGGAGGGUUUCAu	||:||||||||:||||||||||||	atCCGCCCGCCTCGGCCTCCCAAAGTg	>hsa_piR_022437|gb|DQ600690|Homo	NM_001145287.2	217	-60.71	2	26	9531	9557	24	0.9167	1	||||||||||	|||||||:||
2101	uaGGUGGGCGGAGUCGGAGGGUUUCAu	|::||:|||||:||||||||||||	atCTGCCTGCCTCGGCCTCCCAAAGTg	>hsa_piR_022437|gb|DQ600690|Homo	NM_001145287.2	209	-53.22	2	26	13897	13923	24	0.8333	1	||||||||||	|:|||||:||
2102	uaGGUGGGCGGAGUCGGAGGGUUUCAu	||:||||||||:||||||||||||	atCCGCCCGCCTCGGCCTCCCAAAGTg	>hsa_piR_022437|gb|DQ600690|Homo	NM_001145337.3	217	-60.71	2	26	9245	9271	24	0.9167	1	||||||||||	|||||||:||
2103	uaGGUGGGCGGAGUCGGAGGGUUUCAu	|||||:|||||:||||||||||||	gtCCACCTGCCTCGGCCTCCCAAAGTg	>hsa_piR_022437|gb|DQ600690|Homo	NM_001145337.3	217	-58.07	2	26	9957	9983	24	0.9167	1	||||||||||	|:|||||:||
2104	uaGGUGGGCGGAGUCGGAGGGUUUCAu	||:||| ||||:||||||||||||	atCCGCCCACCTCGGCCTCCCAAAGTg	>hsa_piR_022437|gb|DQ600690|Homo	NM_001145337.3	209	-54.87	2	26	1936	1962	24	0.875	0.9583	||||||||||	|| ||||:||
2105	uaGGUGGGCGGAGUCGGAGGGUUUCAu	||:||| ||||:||||||||||||	atCCGCCCACCTCGGCCTCCCAAAGTa	>hsa_piR_022437|gb|DQ600690|Homo	NM_001145337.3	209	-54.97	2	26	7745	7771	24	0.875	0.9583	||||||||||	|| ||||:||
2106	uaGGUGGGCGGAGUCGGAGGGUUUCAu	||:||:||||| ||||||||||||	atCCGCCTGCCTCTGCCTCCCAAAGTg	>hsa_piR_022437|gb|DQ600690|Homo	NM_001145337.3	209	-54.22	2	26	10503	10529	24	0.875	0.9583	||||||||||	|:||||| ||
2107	uaGGUGGGCGGAGUCGGAGGGUUUCAu	|||||:||:|::||||||||||||	acCCACCTGCTTTGGCCTCCCAAAGTg	>hsa_piR_022437|gb|DQ600690|Homo	NM_001145337.3	209	-49.04	2	26	10882	10908	24	0.8333	1	||||||||||	|:||:|::||
2108	uaGGUGGGCGGAGUCGGAGGGUUUCAu	|::||:|||||:||||||||||||	atCTGCCTGCCTCGGCCTCCCAAAGTg	>hsa_piR_022437|gb|DQ600690|Homo	NM_001145337.3	209	-53.22	2	26	11191	11217	24	0.8333	1	||||||||||	|:|||||:||
2109	uaGGUGGGCGGAGUCGGAGGGUUUCAu	|::||:|||||:||||||||||||	atCTGCCTGCCTCGGCCTCCCAAAGTg	>hsa_piR_022437|gb|DQ600690|Homo	NM_001145337.3	209	-53.22	2	26	11270	11296	24	0.8333	1	||||||||||	|:|||||:||
2110	uaGGUGGGCGGAGUCGGAGGGUUUCAu	||| :||||||:||||||||||||	atCCAGTCGCCTCGGCCTCCCAAAGTg	>hsa_piR_022437|gb|DQ600690|Homo	NM_001145337.3	209	-54.57	2	26	11405	11431	24	0.875	0.9583	||||||||||	:||||||:||
2111	uaGGUGGGCGGAGUCGGAGGGUUUCAu	||:||| ||||:||||||||||||	atCCGCCCACCTCGGCCTCCCAAAGTg	>hsa_piR_022437|gb|DQ600690|Homo	NM_001145339.2	209	-54.87	2	26	2169	2195	24	0.875	0.9583	||||||||||	|| ||||:||
2112	uaGGUGGGCGGAGUCGGAGGGUUUCAu	||:||||||||:||||||||||||	atCCGCCCGCCTCGGCCTCCCAAAGTg	>hsa_piR_022437|gb|DQ600690|Homo	NM_001145340.3	217	-60.71	2	26	8798	8824	24	0.9167	1	||||||||||	|||||||:||
2113	uaGGUGGGCGGAGUCGGAGGGUUUCAu	|||||:|||||:||||||||||||	gtCCACCTGCCTCGGCCTCCCAAAGTg	>hsa_piR_022437|gb|DQ600690|Homo	NM_001145340.3	217	-58.07	2	26	9510	9536	24	0.9167	1	||||||||||	|:|||||:||
2114	uaGGUGGGCGGAGUCGGAGGGUUUCAu	||:||| ||||:||||||||||||	atCCGCCCACCTCGGCCTCCCAAAGTg	>hsa_piR_022437|gb|DQ600690|Homo	NM_001145340.3	209	-54.87	2	26	1489	1515	24	0.875	0.9583	||||||||||	|| ||||:||
2115	uaGGUGGGCGGAGUCGGAGGGUUUCAu	||:||| ||||:||||||||||||	atCCGCCCACCTCGGCCTCCCAAAGTa	>hsa_piR_022437|gb|DQ600690|Homo	NM_001145340.3	209	-54.97	2	26	7298	7324	24	0.875	0.9583	||||||||||	|| ||||:||
2116	uaGGUGGGCGGAGUCGGAGGGUUUCAu	||:||:||||| ||||||||||||	atCCGCCTGCCTCTGCCTCCCAAAGTg	>hsa_piR_022437|gb|DQ600690|Homo	NM_001145340.3	209	-54.22	2	26	10056	10082	24	0.875	0.9583	||||||||||	|:||||| ||
2117	uaGGUGGGCGGAGUCGGAGGGUUUCAu	|||||:||:|::||||||||||||	acCCACCTGCTTTGGCCTCCCAAAGTg	>hsa_piR_022437|gb|DQ600690|Homo	NM_001145340.3	209	-49.04	2	26	10435	10461	24	0.8333	1	||||||||||	|:||:|::||
2118	uaGGUGGGCGGAGUCGGAGGGUUUCAu	|::||:|||||:||||||||||||	atCTGCCTGCCTCGGCCTCCCAAAGTg	>hsa_piR_022437|gb|DQ600690|Homo	NM_001145340.3	209	-53.22	2	26	10744	10770	24	0.8333	1	||||||||||	|:|||||:||
2119	uaGGUGGGCGGAGUCGGAGGGUUUCAu	|::||:|||||:||||||||||||	atCTGCCTGCCTCGGCCTCCCAAAGTg	>hsa_piR_022437|gb|DQ600690|Homo	NM_001145340.3	209	-53.22	2	26	10823	10849	24	0.8333	1	||||||||||	|:|||||:||
2120	uaGGUGGGCGGAGUCGGAGGGUUUCAu	||| :||||||:||||||||||||	atCCAGTCGCCTCGGCCTCCCAAAGTg	>hsa_piR_022437|gb|DQ600690|Homo	NM_001145340.3	209	-54.57	2	26	10958	10984	24	0.875	0.9583	||||||||||	:||||||:||
2121	uaGGUGGGCGGAGUCGGAGGGUUUCAu	|||||| ||||:||||||||||||	atCCACCCTCCTCGGCCTCCCAAAGTg	>hsa_piR_022437|gb|DQ600690|Homo	NM_001145343.1	213	-54.95	2	26	4774	4800	24	0.9167	0.9583	||||||||||	|| ||||:||
2122	uaGGUGGGCGGAGUCGGAGGGUUUCAu	|||||| ||||:||||||||||||	atCCACCCTCCTCGGCCTCCCAAAGTg	>hsa_piR_022437|gb|DQ600690|Homo	NM_001145344.1	213	-54.95	2	26	4771	4797	24	0.9167	0.9583	||||||||||	|| ||||:||
2123	uaGGUGGGCGGAGUCGGAGGGUUUCAu	|||||| ||||:||||||||||||	atCCACCCTCCTCGGCCTCCCAAAGTg	>hsa_piR_022437|gb|DQ600690|Homo	NM_001145345.1	213	-54.95	2	26	4783	4809	24	0.9167	0.9583	||||||||||	|| ||||:||
2124	uaGGUGGGCGGAGUCGGAGGGUUUCAu	:||||| |||||||||||||||||	atTCACCCACCTCAGCCTCCCAAAGTg	>hsa_piR_022437|gb|DQ600690|Homo	NM_001145454.3	213	-53.16	2	26	1866	1892	24	0.9167	0.9583	||||||||||	|| |||||||
2125	uaGGUGGGCGGAGUCGGAGGGUUUCAu	:|:|||||||::||||||||||||	atTCGCCCGCCTTGGCCTCCCAAAGTg	>hsa_piR_022437|gb|DQ600690|Homo	NM_001145526.2	209	-53.6	2	26	1565	1591	24	0.8333	1	||||||||||	||||||::||
2126	uaGGUGGGCGGAGUCGGAGGGUUUCAu	|||||:|||||:||||||||||||	atCCACCTGCCTCGGCCTCCCAAAGTg	>hsa_piR_022437|gb|DQ600690|Homo	NM_001145635.2	217	-58.38	2	26	2822	2848	24	0.9167	1	||||||||||	|:|||||:||
2127	uaGGUGGGCGGAGUCGGAGGGUUUCAu	||||||||||||||||||||||||	atCCACCCGCCTCAGCCTCCCAAAGTg	>hsa_piR_022437|gb|DQ600690|Homo	NM_001145649.2	225	-61.83	2	26	3517	3543	24	1	1	||||||||||	||||||||||
2128	uaGGUGGGCGGAGUCGGAGGGUUUCAu	|| ||:|||||:||||||||||||	atCCCCCTGCCTCGGCCTCCCAAAGTg	>hsa_piR_022437|gb|DQ600690|Homo	NM_001145649.2	209	-53.22	2	26	3819	3845	24	0.875	0.9583	||||||||||	|:|||||:||
2129	uaGGUGGGCGGAGUCGGAGGGUUUCAu	||||||||||||||||||||||||	atCCACCCGCCTCAGCCTCCCAAAGTg	>hsa_piR_022437|gb|DQ600690|Homo	NM_001145650.2	225	-61.83	2	26	3457	3483	24	1	1	||||||||||	||||||||||
2130	uaGGUGGGCGGAGUCGGAGGGUUUCAu	|| ||:|||||:||||||||||||	atCCCCCTGCCTCGGCCTCCCAAAGTg	>hsa_piR_022437|gb|DQ600690|Homo	NM_001145650.2	209	-53.22	2	26	3759	3785	24	0.875	0.9583	||||||||||	|:|||||:||
2131	uaGGUGGGCGGAGUCGGAGGGUUUCAu	|||||||||||:||||||||||||	atCCACCCGCCTCGGCCTCCCAAAGTg	>hsa_piR_022437|gb|DQ600690|Homo	NM_001145678.2	221	-61.18	2	26	6896	6922	24	0.9583	1	||||||||||	|||||||:||
2132	uaGGUGGGCGGAGUCGGAGGGUUUCAu	|||||||||||:||||||||||||	atCCACCCGCCTCGGCCTCCCAAAGTg	>hsa_piR_022437|gb|DQ600690|Homo	NM_001145720.2	221	-61.18	2	26	6973	6999	24	0.9583	1	||||||||||	|||||||:||
2133	uaGGUGGGCGGAGUCGGAGGGUUUCAu	||:||:||||||||||||||||||	atCCGCCTGCCTCAGCCTCCCAAAGTg	>hsa_piR_022437|gb|DQ600690|Homo	NM_001145720.2	217	-58.56	2	26	5181	5207	24	0.9167	1	||||||||||	|:||||||||
2134	uaGGUGGGCGGAGUCGGAGGGUUUCAu	|::||:||||||||||||||||||	atCTGCCTGCCTCAGCCTCCCAAAGTg	>hsa_piR_022437|gb|DQ600690|Homo	NM_001145720.2	213	-53.87	2	26	9525	9551	24	0.875	1	||||||||||	|:||||||||
2135	uaGGUGGGCGGAGUCGGAGGGUUUCAu	| |:||||||| ||||||||||||	ggCAATCCGCCTCTGCCTCCCAAAGTg	>hsa_piR_022437|gb|DQ600690|Homo	NM_001145720.2	205	-47.01	2	26	8680	8706	24	0.875	0.9167	||||||||||	||||||| ||
2136	uaGGUGGGCGGAGUCGGAGGGUUUCAu	|::||:||||::||||||||||||	atCTGCCTGCCTTGGCCTCCCAAAGTg	>hsa_piR_022437|gb|DQ600690|Homo	NM_001145727.3	205	-48.94	2	26	1246	1272	24	0.7917	1	||||||||||	|:||||::||
2137	uaggugGGCGGAGUC---GGAGGGUUUCAu	|:| ||:|| |||||||||||	tgcttgCTGACTTAGCCTCCTCCCAAAGTc	>hsa_piR_022437|gb|DQ600690|Homo	NM_001145775.2	172	-29.73	2	22	2281	2310	23	0.7391	0.8261	||||||||||	||:|| |
2138	uaggugGGCGGAGUC---GGAGGGUUUCAu	|:| ||:|| |||||||||||	tgcttgCTGACTTAGCCTCCTCCCAAAGTc	>hsa_piR_022437|gb|DQ600690|Homo	NM_001145776.1	172	-29.73	2	22	2168	2197	23	0.7391	0.8261	||||||||||	||:|| |
2139	uaGGUGGGCGGAGUCGGAGGGUUUCAu	|| |||||||||||||||||||||	atCCTCCCGCCTCAGCCTCCCAAAGTg	>hsa_piR_022437|gb|DQ600690|Homo	NM_001145784.2	217	-57.44	2	26	490	516	24	0.9583	0.9583	||||||||||	||||||||||
2140	uaGGUGGGCGGAGUCGGAGGGUUUCAu	|::|: ||||||||||||||||||	atCTGCTGGCCTCAGCCTCCCAAAGTt	>hsa_piR_022437|gb|DQ600690|Homo	NM_001145855.2	205	-47.19	2	26	7452	7478	24	0.8333	0.9583	||||||||||	: ||||||||
2141	uaGGUGGGCGGAGUCGGAGGGUUUCAu	|::||| |||::||||||||||||	atCTGCCCACCTTGGCCTCCCAAAGTg	>hsa_piR_022437|gb|DQ600690|Homo	NM_001145855.2	201	-45.9	2	26	3908	3934	24	0.7917	0.9583	||||||||||	|| |||::||
2142	uaGGUGGGCGGAGUCGGAGGGUUUCAu	|| ||| :||:: |||||||||||	agCCTCCCATCTTGACCTCCCAAAGTg	>hsa_piR_022437|gb|DQ600690|Homo	NM_001145855.2	189	-39.5	2	26	7846	7872	24	0.75	0.875	||||||||||	|| :||:: |
2143	uaGGUGGGCGGAGUCGGAGGGUUUCAu	|::|: ||||||||||||||||||	atCTGCTGGCCTCAGCCTCCCAAAGTt	>hsa_piR_022437|gb|DQ600690|Homo	NM_001145856.2	205	-47.19	2	26	7486	7512	24	0.8333	0.9583	||||||||||	: ||||||||
2144	uaGGUGGGCGGAGUCGGAGGGUUUCAu	|::||| |||::||||||||||||	atCTGCCCACCTTGGCCTCCCAAAGTg	>hsa_piR_022437|gb|DQ600690|Homo	NM_001145856.2	201	-45.9	2	26	3942	3968	24	0.7917	0.9583	||||||||||	|| |||::||
2145	uaGGUGGGCGGAGUCGGAGGGUUUCAu	|| ||| :||:: |||||||||||	agCCTCCCATCTTGACCTCCCAAAGTg	>hsa_piR_022437|gb|DQ600690|Homo	NM_001145856.2	189	-39.5	2	26	7880	7906	24	0.75	0.875	||||||||||	|| :||:: |
2146	uaGGUGGGCGGAGUCGGAGGGUUUCAu	||::|| |||||||||||||||||	atCCGTCCACCTCAGCCTCCCAAAGTg	>hsa_piR_022437|gb|DQ600690|Homo	NM_001146106.2	209	-52.75	2	26	3869	3895	24	0.875	0.9583	||||||||||	|| |||||||
2147	uaGGUGGGCGGAGUCGGAGGGUUUCAu	||||||||||::||||||||||||	atCCACCCGCCTTGGCCTCCCAAAGTg	>hsa_piR_022437|gb|DQ600690|Homo	NM_001146152.1	217	-56.9	2	26	2475	2501	24	0.9167	1	||||||||||	||||||::||
2148	uaGGUGGGCGGAGUCGGAGGGUUUCAu	||:||||||||:||||||||||||	atCCGCCCGCCTCGGCCTCCCAAAGTg	>hsa_piR_022437|gb|DQ600690|Homo	NM_001146169.2	217	-60.71	2	26	1446	1472	24	0.9167	1	||||||||||	|||||||:||
2149	uaGGUGGGCGGAGUCGGAGGGUUUCAu	||:||||||||:||||||||||||	atCCGCCCGCCTCGGCCTCCCAAAGTg	>hsa_piR_022437|gb|DQ600690|Homo	NM_001146170.1	217	-60.71	2	26	1462	1488	24	0.9167	1	||||||||||	|||||||:||
2150	uaGGUGGGCGGAGUCGGAGGGUUUCAu	||:||||||||:||||||||||||	atCCGCCCGCCTCGGCCTCCCAAAGTg	>hsa_piR_022437|gb|DQ600690|Homo	NM_001146171.1	217	-60.71	2	26	1546	1572	24	0.9167	1	||||||||||	|||||||:||
2151	uaGGUGGGCGGAGUCGGAGGGUUUCAu	||:|||||||:|| ||||||||||	atCCGCCCGCCTTAGACTCCCAAAGTg	>hsa_piR_022437|gb|DQ600690|Homo	NM_001146175.2	209	-52.4	2	26	1916	1942	24	0.875	0.9583	||||||||||	||||||:||
2152	uaGGUGGGCGGAGUCGGAGGGUUUCAu	||||| ||||||||||||||||||	atCCACCAGCCTCAGCCTCCCAAAGTg	>hsa_piR_022437|gb|DQ600690|Homo	NM_001146202.2	217	-54.27	2	26	2630	2656	24	0.9583	0.9583	||||||||||	| ||||||||
2153	uaGGUGGGCGGAGUCGGAGGGUUUCAu	||||| ||||||||||||||||||	atCCACCAGCCTCAGCCTCCCAAAGTg	>hsa_piR_022437|gb|DQ600690|Homo	NM_001146203.1	217	-54.27	2	26	2482	2508	24	0.9583	0.9583	||||||||||	| ||||||||
2154	uaGGUGGGCGGAGUCGGAGGGUUUCAu	||||| ||||||||||||||||||	atCCACCAGCCTCAGCCTCCCAAAGTg	>hsa_piR_022437|gb|DQ600690|Homo	NM_001146204.2	217	-54.27	2	26	2465	2491	24	0.9583	0.9583	||||||||||	| ||||||||
2155	uaGGUGGGCGGAGUCGGAGGGUUUCAu	||||| ||||||||||||||||||	atCCACCAGCCTCAGCCTCCCAAAGTg	>hsa_piR_022437|gb|DQ600690|Homo	NM_001146205.2	217	-54.27	2	26	2570	2596	24	0.9583	0.9583	||||||||||	| ||||||||
2156	uaGGUGGGCGGAGUCGGAGGGUUUCAu	||||| ||||||||||||||||||	atCCACCAGCCTCAGCCTCCCAAAGTg	>hsa_piR_022437|gb|DQ600690|Homo	NM_001146206.1	217	-54.27	2	26	2191	2217	24	0.9583	0.9583	||||||||||	| ||||||||
2157	uaGGUGGGCGGAGUCGGAGGGUUUCAu	||||| ||||||||||||||||||	atCCACCAGCCTCAGCCTCCCAAAGTg	>hsa_piR_022437|gb|DQ600690|Homo	NM_001146207.1	217	-54.27	2	26	2467	2493	24	0.9583	0.9583	||||||||||	| ||||||||
2158	uaGGUGGGCGGAGUCGGAGGGUUUCAu	||||:|||:|||||||||||||||	atCCACTCGCTTCAGCCTCCCAAAGTg	>hsa_piR_022437|gb|DQ600690|Homo	NM_001146213.2	217	-55.82	2	26	3439	3465	24	0.9167	1	||||||||||	:|||:|||||
2159	uaGGUGGGCGGAGUCGGAGGGUUUCAu	||||:|||:|||||||||||||||	atCCACTCGCTTCAGCCTCCCAAAGTg	>hsa_piR_022437|gb|DQ600690|Homo	NM_001146214.2	217	-55.82	2	26	3531	3557	24	0.9167	1	||||||||||	:|||:|||||
2160	uaGGUGGGCGGAGUCGGAGGGUUUCAu	:|:|:||:|||:||||||||||||	atTCGCTCGTCTCGGCCTCCCAAAGTg	>hsa_piR_022437|gb|DQ600690|Homo	NM_001146227.2	205	-52.52	2	26	1654	1680	24	0.7917	1	||||||||||	:||:|||:||
2161	uaGGUGGGCGGAGUCGGAGGGUUUCAu	||:|||||||||||||||||||||	atCCGCCCGCCTCAGCCTCCCAAAGTg	>hsa_piR_022437|gb|DQ600690|Homo	NM_001146291.2	221	-61.36	2	26	3099	3125	24	0.9583	1	||||||||||	||||||||||
2162	uaGGUGGGCGGAGUCGGAGGGUUUCAu	||:||||||||:||||||||||||	atCCGCCCGCCTCGGCCTCCCAAAGTg	>hsa_piR_022437|gb|DQ600690|Homo	NM_001146310.1	217	-60.71	2	26	234	260	24	0.9167	1	||||||||||	|||||||:||
2163	uaGGUGGGCGGAGUCGGAGGGUUUCAu	|| ||| ||||: |||||||||||	atCCTCCCACCTCGACCTCCCAAAGTg	>hsa_piR_022437|gb|DQ600690|Homo	NM_001146333.2	197	-45.65	2	26	1666	1692	24	0.8333	0.875	||||||||||	|| ||||: |
2164	uaGGUGGGCGGAGUCGGAGGGUUUCAu	|||||: ||||:||||||||||||	atCCACCTACCTCGGCCTCCCAAAGTg	>hsa_piR_022437|gb|DQ600690|Homo	NM_001146699.2	209	-52.39	2	26	3176	3202	24	0.875	0.9583	||||||||||	|: ||||:||
2165	uaGGUGGGCGGAGUCGGAGGGUUUCAu	|||||| |||:: :||||||||||	atCCACCCACCTTGTTCTCCCAAAGTg	>hsa_piR_022437|gb|DQ600690|Homo	NM_001146699.2	197	-44.47	2	26	3310	3336	24	0.7917	0.9167	||||||||||	|| |||:: :
2166	uaGGUGGGCGGAGUCGGAGGGUUUCAu	|| ||| |||::||||||||||||	gtCCTCCCACCTTGGCCTCCCAAAGTg	>hsa_piR_022437|gb|DQ600690|Homo	NM_001146705.1	201	-46.36	2	26	1714	1740	24	0.8333	0.9167	||||||||||	|| |||::||
2167	uaGGUGGGCGGAGUCGGAGGGUUUCAu	|| ||| ||||:||||||||||||	atCCCCCCACCTCGGCCTCCCAAAGTg	>hsa_piR_022437|gb|DQ600690|Homo	NM_001159296.2	205	-50.18	2	26	3405	3431	24	0.875	0.9167	||||||||||	|| ||||:||
2168	uaGGUGGGCGGAGUCGGAGGGUUUCAu	|::||||||||:||||||||||||	atCTGCCCGCCTCGGCCTCCCAAAGTg	>hsa_piR_022437|gb|DQ600690|Homo	NM_001159642.2	213	-56.02	2	26	1978	2004	24	0.875	1	||||||||||	|||||||:||
2169	uaGGUGGGCGGAGUCGGAGGGUUUCAu	||:||||:||::||||||||||||	atCCGCCCGTCTTGGCCTCCCAAAGTg	>hsa_piR_022437|gb|DQ600690|Homo	NM_001159727.2	209	-54.14	2	26	3007	3033	24	0.8333	1	||||||||||	|||:||::||
2170	uaGGUGGGCGGAGUCGGAGGGUUUCAu	||:||:||||::||||||||||||	atCCGCCTGCCTTGGCCTCCCAAAGTg	>hsa_piR_022437|gb|DQ600690|Homo	NM_001159861.2	209	-53.63	2	26	2978	3004	24	0.8333	1	||||||||||	|:||||::||
2171	uaGGUGGGCGGAGUCGGAGGGUUUCAu	|| ||:|||||:||||||||||||	atCCTCCTGCCTCGGCCTCCCAAAGTg	>hsa_piR_022437|gb|DQ600690|Homo	NM_001159995.3	209	-53.99	2	26	8937	8963	24	0.875	0.9583	||||||||||	|:|||||:||
2172	uaGGUGGGCGGAGUCGGAGGGUUUCAu	|| ||:|||||:||||||||||||	atCCTCCTGCCTCGGCCTCCCAAAGTg	>hsa_piR_022437|gb|DQ600690|Homo	NM_001159999.3	209	-53.99	2	26	8988	9014	24	0.875	0.9583	||||||||||	|:|||||:||
2173	uaGGUGGGCGGAGUCGGAGGGUUUCAu	|:||||||||::||||||||||||	atCTACCCGCCTTGGCCTCCCAAAGTg	>hsa_piR_022437|gb|DQ600690|Homo	NM_001160.3	213	-54.19	2	26	4976	5002	24	0.875	1	||||||||||	||||||::||
2174	uaGGUGGGCGGAGUCGGAGGGUUUCAu	|| ||:||||||||||||||||||	atCCTCCTGCCTCAGCCTCCCAAAGTg	>hsa_piR_022437|gb|DQ600690|Homo	NM_001160.3	213	-54.64	2	26	5279	5305	24	0.9167	0.9583	||||||||||	|:||||||||
2175	uaGGUGGGCGGAGUCGGAGGGUUUCAu	|| ||:|||||:||||||||||||	atCCTCCTGCCTCGGCCTCCCAAAGTg	>hsa_piR_022437|gb|DQ600690|Homo	NM_001160001.3	209	-53.99	2	26	8886	8912	24	0.875	0.9583	||||||||||	|:|||||:||
2176	uaGGUGGGCGGAGUCGGAGGGUUUCAu	|| ||:|||||:||||||||||||	atCCTCCTGCCTCGGCCTCCCAAAGTg	>hsa_piR_022437|gb|DQ600690|Homo	NM_001160004.3	209	-53.99	2	26	9435	9461	24	0.875	0.9583	||||||||||	|:|||||:||
2177	uaGGUGGGCGGAGUCGGAGGGUUUCAu	|||||:||||||||||||||||||	atCCACCTGCCTCAGCCTCCCAAAGTg	>hsa_piR_022437|gb|DQ600690|Homo	NM_001160103.2	221	-59.03	2	26	14868	14894	24	0.9583	1	||||||||||	|:||||||||
2178	uaGGUGGGCGGAGUCGGAGGGUUUCAu	|::||:|||||:||||||||||||	atCTGCCTGCCTCGGCCTCCCAAAGTg	>hsa_piR_022437|gb|DQ600690|Homo	NM_001160103.2	209	-53.22	2	26	10458	10484	24	0.8333	1	||||||||||	|:|||||:||
2179	uaGGUGGGCGGAGUCGGAGGGUUUCAu	|::||:|||||:||||||||||||	atCTGCCTGCCTCGGCCTCCCAAAGTg	>hsa_piR_022437|gb|DQ600690|Homo	NM_001160103.2	209	-53.22	2	26	13810	13836	24	0.8333	1	||||||||||	|:|||||:||
2180	uaGGUGGGCGGAGUCGGAGGGUUUCAu	||:||| ||||:||||||||||||	atCCGCCCACCTCGGCCTCCCAAAGTg	>hsa_piR_022437|gb|DQ600690|Homo	NM_001160103.2	209	-54.87	2	26	14205	14231	24	0.875	0.9583	||||||||||	|| ||||:||
2181	uaGGUGGGCG-GAGUCGGAGGGUUUCAu	:||||| | |||:||||||||||||	gaTCACCCCCGCTCGGCCTCCCAAAGTg	>hsa_piR_022437|gb|DQ600690|Homo	NM_001160103.2	200	-47.95	2	26	7939	7966	25	0.84	0.92	||||||||||	| | |||:||
2182	uaGGUGGGCGGAGUCGGAGGGUUUCAu	|||||:||||||||||||||||||	atCCACCTGCCTCAGCCTCCCAAAGTg	>hsa_piR_022437|gb|DQ600690|Homo	NM_001160104.2	221	-59.03	2	26	14853	14879	24	0.9583	1	||||||||||	|:||||||||
2183	uaGGUGGGCGGAGUCGGAGGGUUUCAu	|::||:|||||:||||||||||||	atCTGCCTGCCTCGGCCTCCCAAAGTg	>hsa_piR_022437|gb|DQ600690|Homo	NM_001160104.2	209	-53.22	2	26	10443	10469	24	0.8333	1	||||||||||	|:|||||:||
2184	uaGGUGGGCGGAGUCGGAGGGUUUCAu	|::||:|||||:||||||||||||	atCTGCCTGCCTCGGCCTCCCAAAGTg	>hsa_piR_022437|gb|DQ600690|Homo	NM_001160104.2	209	-53.22	2	26	13795	13821	24	0.8333	1	||||||||||	|:|||||:||
2185	uaGGUGGGCGGAGUCGGAGGGUUUCAu	||:||| ||||:||||||||||||	atCCGCCCACCTCGGCCTCCCAAAGTg	>hsa_piR_022437|gb|DQ600690|Homo	NM_001160104.2	209	-54.87	2	26	14190	14216	24	0.875	0.9583	||||||||||	|| ||||:||
2186	uaGGUGGGCG-GAGUCGGAGGGUUUCAu	:||||| | |||:||||||||||||	gaTCACCCCCGCTCGGCCTCCCAAAGTg	>hsa_piR_022437|gb|DQ600690|Homo	NM_001160104.2	200	-47.95	2	26	7924	7951	25	0.84	0.92	||||||||||	| | |||:||
2187	uaGGUGGGCGGAGUCGGAGGGUUUCAu	|||||:|||||:||||||||||||	atCCACCTGCCTCGGCCTCCCAAAGTg	>hsa_piR_022437|gb|DQ600690|Homo	NM_001160110.1	217	-58.38	2	26	1807	1833	24	0.9167	1	||||||||||	|:|||||:||
2188	uaGGUGGGCGGAGUCGGAGGGUUUCAu	|||||:|||||:||||||||||||	atCCACCTGCCTCGGCCTCCCAAAGTg	>hsa_piR_022437|gb|DQ600690|Homo	NM_001160111.1	217	-58.38	2	26	1967	1993	24	0.9167	1	||||||||||	|:|||||:||
2189	uaGGUGGGCGGAGUCGGAGGGUUUCAu	:||||| || |:||||||||||||	atTCACCCACCCCGGCCTCCCAAAGTg	>hsa_piR_022437|gb|DQ600690|Homo	NM_001160113.2	201	-47.32	2	26	976	1002	24	0.8333	0.9167	||||||||||	|| || |:||
2190	uaGGUGGGCGGAGUCGGAGGGUUUCAu	|| |||||||::||||||||||||	atCCTCCCGCCTTGGCCTCCCAAAGTg	>hsa_piR_022437|gb|DQ600690|Homo	NM_001160166.2	209	-52.51	2	26	2752	2778	24	0.875	0.9583	||||||||||	||||||::||
2191	uaGGUGGGCGGAGUCGGAGGGUUUCAu	||||: ||||::||||||||||||	atCCACTGGCCTTGGCCTCCCAAAGTg	>hsa_piR_022437|gb|DQ600690|Homo	NM_001161425.2	205	-48.83	2	26	2507	2533	24	0.8333	0.9583	||||||||||	: ||||::||
2192	uagGUG-GGCGGAGUCGGAGGGUUUCAu	||| ::||||||||||||||||||	ataCACTTTGCCTCAGCCTCCCAAAGTg	>hsa_piR_022437|gb|DQ600690|Homo	NM_001161429.3	203	-47.81	2	25	3951	3978	24	0.875	0.9583	||||||||||	::||||||||
2193	uaGGUGGGCGGAGUCGGAGGGUUUCAu	||:|||||||||||||||||||||	atCCGCCCGCCTCAGCCTCCCAAAGTg	>hsa_piR_022437|gb|DQ600690|Homo	NM_001162483.1	221	-61.36	2	26	1190	1216	24	0.9583	1	||||||||||	||||||||||
2194	uaGGUGGGCGGAGUCGGAGGGUUUCAu	|||||| |||::||||||||||||	atCCACCCACCTTGGCCTCCCAAAGTg	>hsa_piR_022437|gb|DQ600690|Homo	NM_001162505.2	209	-51.06	2	26	3467	3493	24	0.875	0.9583	||||||||||	|| |||::||
2195	uaGGUGGGCGGAGUCGGAGGGUUUCAu	:| ||||||||:||||||||||||	atTCTCCCGCCTCGGCCTCCCAAAGTg	>hsa_piR_022437|gb|DQ600690|Homo	NM_001163264.2	209	-53.96	2	26	4509	4535	24	0.875	0.9583	||||||||||	|||||||:||
2196	uaGGUGGGCGGAGUCGGAGGGUUUCAu	:| ||||||||:||||||||||||	atTCTCCCGCCTCGGCCTCCCAAAGTg	>hsa_piR_022437|gb|DQ600690|Homo	NM_001163265.2	209	-53.96	2	26	4225	4251	24	0.875	0.9583	||||||||||	|||||||:||
2197	uaGGUGGGCGGAGUCGGAGGGUUUCAu	|::|||||||::||||||||||||	atCTGCCCGCCTTGGCCTCCCAAAGTg	>hsa_piR_022437|gb|DQ600690|Homo	NM_001163321.4	209	-51.74	2	26	3217	3243	24	0.8333	1	||||||||||	||||||::||
2198	uaGGUGGGCGGAGUCGGAGGGUUUCAu	|::|||||||::||||||||||||	atCTGCCCGCCTTGGCCTCCCAAAGTg	>hsa_piR_022437|gb|DQ600690|Homo	NM_001163322.2	209	-51.74	2	26	3307	3333	24	0.8333	1	||||||||||	||||||::||
2199	uaGGUGGGCGGAGUCGGAGGGUUUCAu	|::|||||||::||||||||||||	atCTGCCCGCCTTGGCCTCCCAAAGTg	>hsa_piR_022437|gb|DQ600690|Homo	NM_001163323.3	209	-51.74	2	26	3763	3789	24	0.8333	1	||||||||||	||||||::||
2200	uaGGUGGGCGGAGUCGGAGGGUUUCAu	||:|| |||||:||||||||||||	atCCGCCAGCCTCGGCCTCCCAAAGTg	>hsa_piR_022437|gb|DQ600690|Homo	NM_001163377.2	209	-53.15	2	26	1424	1450	24	0.875	0.9583	||||||||||	| |||||:||
2201	uaGGUGGGCGGAGUCGGAGGGUUUCAu	||:||| |||::||||||||||||	atCCGCCCACCTTGGCCTCCCAAAGTg	>hsa_piR_022437|gb|DQ600690|Homo	NM_001163380.2	205	-50.59	2	26	1511	1537	24	0.8333	0.9583	||||||||||	|| |||::||
2202	uaGGUGGGCGGAGUCGGAGGGUUUCAu	||:|||||||||||||||||||||	atCCGCCCGCCTCAGCCTCCCAAAGTa	>hsa_piR_022437|gb|DQ600690|Homo	NM_001163544.3	221	-61.46	2	26	5716	5742	24	0.9583	1	||||||||||	||||||||||
2203	uaGGUGGGCGGAGUCGGAGGGUUUCAu	||:|||||||||||||||||||||	atCCGCCCGCCTCAGCCTCCCAAAGTa	>hsa_piR_022437|gb|DQ600690|Homo	NM_001163545.3	221	-61.46	2	26	5713	5739	24	0.9583	1	||||||||||	||||||||||
2204	uaGGUGGGCGGAGUCGGAGGGUUUCAu	||:|||||||||||||||||||||	atCCGCCCGCCTCAGCCTCCCAAAGTa	>hsa_piR_022437|gb|DQ600690|Homo	NM_001163546.3	221	-61.46	2	26	5545	5571	24	0.9583	1	||||||||||	||||||||||
2205	uaGGUGGGCGGAGUCGGAGGGUUUCAu	||:|||||||||||||||||||||	atCCGCCCGCCTCAGCCTCCCAAAGTa	>hsa_piR_022437|gb|DQ600690|Homo	NM_001163547.3	221	-61.46	2	26	5332	5358	24	0.9583	1	||||||||||	||||||||||
2206	uaGGUGGGCGGAGUCGGAGGGUUUCAu	||:||| ||||:||||||||||||	atCCGCCCACCTCGGCCTCCCAAAGTg	>hsa_piR_022437|gb|DQ600690|Homo	NM_001163942.2	209	-54.87	2	26	1789	1815	24	0.875	0.9583	||||||||||	|| ||||:||
2207	uaGGUGGGCGGAGUCGGAGGGUUUCAu	|::|| |||||:||||||||||||	acCTGCCGGCCTCGGCCTCCCAAAGTa	>hsa_piR_022437|gb|DQ600690|Homo	NM_001163989.1	205	-50.85	2	26	1929	1955	24	0.8333	0.9583	||||||||||	| |||||:||
2208	uaGGUGGGCGGAGUCGGAGGGUUUCAu	|::|| |||||:||||||||||||	acCTGCCGGCCTCGGCCTCCCAAAGTa	>hsa_piR_022437|gb|DQ600690|Homo	NM_001163990.2	205	-50.85	2	26	1630	1656	24	0.8333	0.9583	||||||||||	| |||||:||
2209	uaGGUGGGCGGAGUCGGAGGGUUUCAu	:| ||||||||:||||||||||||	caTCCCCCGCCTCGGCCTCCCAAAGTg	>hsa_piR_022437|gb|DQ600690|Homo	NM_001164114.2	209	-56.81	2	26	3359	3385	24	0.875	0.9583	||||||||||	|||||||:||
2210	uaGGUGGGCGGAGUCGGAGGGUUUCAu	:| ||||||||:||||||||||||	caTCCCCCGCCTCGGCCTCCCAAAGTg	>hsa_piR_022437|gb|DQ600690|Homo	NM_001164115.2	209	-56.81	2	26	2210	2236	24	0.875	0.9583	||||||||||	|||||||:||
2211	uaGGUGGGCGGAGUCGGAGGGUUUCAu	:| ||||||||:||||||||||||	caTCCCCCGCCTCGGCCTCCCAAAGTg	>hsa_piR_022437|gb|DQ600690|Homo	NM_001164116.2	209	-56.81	2	26	3623	3649	24	0.875	0.9583	||||||||||	|||||||:||
2212	uaGGUGGGCGGAGUCGGAGGGUUUCAu	|| ||:||||::||||||||||||	atCCTCCTGCCTTGGCCTCCCAAAGTg	>hsa_piR_022437|gb|DQ600690|Homo	NM_001164178.1	205	-49.71	2	26	5767	5793	24	0.8333	0.9583	||||||||||	|:||||::||
2213	uaGGUGGGCGGAGUCGGAGGGUUUCAu	|| ::|||||:| ||||||||||	atCCTATTGCCTCGGGCTCCCAAAGTg	>hsa_piR_022437|gb|DQ600690|Homo	NM_001164178.1	189	-43.07	2	26	4738	4764	24	0.75	0.875	||||||||||	::|||||:|
2214	uaGGUGGGCGGAGUCGGAGGGUUUCAu	|| ||:||||::||||||||||||	atCCTCCTGCCTTGGCCTCCCAAAGTg	>hsa_piR_022437|gb|DQ600690|Homo	NM_001164179.2	205	-49.71	2	26	5622	5648	24	0.8333	0.9583	||||||||||	|:||||::||
2215	uaGGUGGGCGGAGUCGGAGGGUUUCAu	|| ::|||||:| ||||||||||	atCCTATTGCCTCGGGCTCCCAAAGTg	>hsa_piR_022437|gb|DQ600690|Homo	NM_001164179.2	189	-43.07	2	26	4593	4619	24	0.75	0.875	||||||||||	::|||||:|
2216	uaGGUGGGCGGAGUCGGAGGGUUUCAu	|| ||:||||::||||||||||||	atCCTCCTGCCTTGGCCTCCCAAAGTg	>hsa_piR_022437|gb|DQ600690|Homo	NM_001164181.1	205	-49.71	2	26	5639	5665	24	0.8333	0.9583	||||||||||	|:||||::||
2217	uaGGUGGGCGGAGUCGGAGGGUUUCAu	|| ::|||||:| ||||||||||	atCCTATTGCCTCGGGCTCCCAAAGTg	>hsa_piR_022437|gb|DQ600690|Homo	NM_001164181.1	189	-43.07	2	26	4610	4636	24	0.75	0.875	||||||||||	::|||||:|
2218	uaGGUGGGCGGAGUCGGAGGGUUUCAu	|| ||:||||::||||||||||||	atCCTCCTGCCTTGGCCTCCCAAAGTg	>hsa_piR_022437|gb|DQ600690|Homo	NM_001164182.2	205	-49.71	2	26	5594	5620	24	0.8333	0.9583	||||||||||	|:||||::||
2219	uaGGUGGGCGGAGUCGGAGGGUUUCAu	|| ::|||||:| ||||||||||	atCCTATTGCCTCGGGCTCCCAAAGTg	>hsa_piR_022437|gb|DQ600690|Homo	NM_001164182.2	189	-43.07	2	26	4565	4591	24	0.75	0.875	||||||||||	::|||||:|
2220	uaGGUGGGCGGAGUCGGAGGGUUUCAu	|| ||:||||::||||||||||||	atCCTCCTGCCTTGGCCTCCCAAAGTg	>hsa_piR_022437|gb|DQ600690|Homo	NM_001164183.2	205	-49.71	2	26	5476	5502	24	0.8333	0.9583	||||||||||	|:||||::||
2221	uaGGUGGGCGGAGUCGGAGGGUUUCAu	|| ::|||||:| ||||||||||	atCCTATTGCCTCGGGCTCCCAAAGTg	>hsa_piR_022437|gb|DQ600690|Homo	NM_001164183.2	189	-43.07	2	26	4447	4473	24	0.75	0.875	||||||||||	::|||||:|
2222	uaGGUGGGCGGAGUCGGAGGGUUUCAu	||:||| ||||:||||||||||||	atCCGCCCACCTCGGCCTCCCAAAGTg	>hsa_piR_022437|gb|DQ600690|Homo	NM_001164281.2	209	-54.87	2	26	3804	3830	24	0.875	0.9583	||||||||||	|| ||||:||
2223	uaGGUGGGCGGAGUCGGAGGGUUUCAu	:||||:||||::||||||||||||	atTCACCTGCCTTGGCCTCCCAAAGTg	>hsa_piR_022437|gb|DQ600690|Homo	NM_001164281.2	209	-51.27	2	26	4702	4728	24	0.8333	1	||||||||||	|:||||::||
2224	uaGGUGGGCGGAGUCGGAGGGUUUCAu	||:||| ||||:||||||||||||	atCCGCCCACCTCGGCCTCCCAAAGTg	>hsa_piR_022437|gb|DQ600690|Homo	NM_001164283.3	209	-54.87	2	26	2005	2031	24	0.875	0.9583	||||||||||	|| ||||:||
2225	uaGGUGGGCGGAGUCGGAGGGUUUCAu	:||||:||||::||||||||||||	atTCACCTGCCTTGGCCTCCCAAAGTg	>hsa_piR_022437|gb|DQ600690|Homo	NM_001164283.3	209	-51.27	2	26	2903	2929	24	0.8333	1	||||||||||	|:||||::||
2226	uaggUGGGCGGAGUCGGAGGGUUUCAu	|||: || | ||||||||||	ttaaACCTAGCTGAAACTCCCAAAGTg	>hsa_piR_022437|gb|DQ600690|Homo	NM_001164342.2	171	-27.88	2	24	4480	4506	22	0.7273	0.7727	||||||||||	|: || |
2227	uaggUGGGCGGAGUCGGAGGGUUUCAu	|||: || | ||||||||||	ttaaACCTAGCTGAAACTCCCAAAGTg	>hsa_piR_022437|gb|DQ600690|Homo	NM_001164343.2	171	-27.88	2	24	4942	4968	22	0.7273	0.7727	||||||||||	|: || |
2228	uaggUGGGCGGAGUCGGAGGGUUUCAu	|||: || | ||||||||||	ttaaACCTAGCTGAAACTCCCAAAGTg	>hsa_piR_022437|gb|DQ600690|Homo	NM_001164344.3	171	-27.88	2	24	4736	4762	22	0.7273	0.7727	||||||||||	|: || |
2229	uaggUGGGCGGAGUCGGAGGGUUUCAu	|||: || | ||||||||||	ttaaACCTAGCTGAAACTCCCAAAGTg	>hsa_piR_022437|gb|DQ600690|Homo	NM_001164345.3	171	-27.88	2	24	4690	4716	22	0.7273	0.7727	||||||||||	|: || |
2230	uaggUGGGCGGAGUCGGAGGGUUUCAu	|||: || | ||||||||||	ttaaACCTAGCTGAAACTCCCAAAGTg	>hsa_piR_022437|gb|DQ600690|Homo	NM_001164346.2	171	-27.88	2	24	4499	4525	22	0.7273	0.7727	||||||||||	|: || |
2231	uaggUGGGCGGAGUCGGAGGGUUUCAu	|||: || | ||||||||||	ttaaACCTAGCTGAAACTCCCAAAGTg	>hsa_piR_022437|gb|DQ600690|Homo	NM_001164347.2	171	-27.88	2	24	4521	4547	22	0.7273	0.7727	||||||||||	|: || |
2232	uaGGUGGGCGGAGUCGGAGGGUUUCAu	|||||| |||||||||||||||||	atCCACCCACCTCAGCCTCCCAAAGTg	>hsa_piR_022437|gb|DQ600690|Homo	NM_001164407.2	217	-55.99	2	26	2156	2182	24	0.9583	0.9583	||||||||||	|| |||||||
2233	uaGGUGGGCGGAGUCGGAGGGUUUCAu	|||||:||:||:||||||||||||	atCCACCTGCTTCGGCCTCCCAAAGTg	>hsa_piR_022437|gb|DQ600690|Homo	NM_001164537.2	213	-55.44	2	26	1253	1279	24	0.875	1	||||||||||	|:||:||:||
2234	uaGGUGGGCGGAGUCGGAGGGUUUCAu	|||||: |||||||||||||||||	atCCACCTTCCTCAGCCTCCCAAAGTg	>hsa_piR_022437|gb|DQ600690|Homo	NM_001164539.2	213	-52.66	2	26	2276	2302	24	0.9167	0.9583	||||||||||	|: |||||||
2235	uaGGUGGGCGGAGUCGGAGGGUUUCAu	|||||:|:|||:||||||||||||	atCCACCTGTCTCGGCCTCCCAAAGTg	>hsa_piR_022437|gb|DQ600690|Homo	NM_001164629.5	213	-56.09	2	26	7218	7244	24	0.875	1	||||||||||	|:|:|||:||
2236	uaGGUGGGCGGAGUCGGAGGGUUUCAu	||||:|||||::||||||||||||	atCCACTCGCCTTGGCCTCCCAAAGTg	>hsa_piR_022437|gb|DQ600690|Homo	NM_001164688.2	213	-53.83	2	26	2795	2821	24	0.875	1	||||||||||	:|||||::||
2237	uaGGUGGGCGGAGUCGGAGGGUUUCAu	||:||:||||::||||||||||||	atCCGCCTGCCTTGGCCTCCCAAAGTg	>hsa_piR_022437|gb|DQ600690|Homo	NM_001164774.2	209	-53.63	2	26	2719	2745	24	0.8333	1	||||||||||	|:||||::||
2238	uaGGUGGGCGGAGUCGGAGGGUUUCAu	|::||:||||::||||||||||||	atCTGCCTGCCTTGGCCTCCCAAAGTg	>hsa_piR_022437|gb|DQ600690|Homo	NM_001164774.2	205	-48.94	2	26	5154	5180	24	0.7917	1	||||||||||	|:||||::||
2239	uaGGUGGGCGGAGUCGGAGGGUUUCAu	||:||:||||::||||||||||||	atCCGCCTGCCTTGGCCTCCCAAAGTg	>hsa_piR_022437|gb|DQ600690|Homo	NM_001164776.2	209	-53.63	2	26	2764	2790	24	0.8333	1	||||||||||	|:||||::||
2240	uaGGUGGGCGGAGUCGGAGGGUUUCAu	|::||:||||::||||||||||||	atCTGCCTGCCTTGGCCTCCCAAAGTg	>hsa_piR_022437|gb|DQ600690|Homo	NM_001164776.2	205	-48.94	2	26	5199	5225	24	0.7917	1	||||||||||	|:||||::||
2241	uaGGUGGGCGGAGUCGGAGGGUUUCAu	||:||:||||::||||||||||||	atCCGCCTGCCTTGGCCTCCCAAAGTg	>hsa_piR_022437|gb|DQ600690|Homo	NM_001164777.2	209	-53.63	2	26	2599	2625	24	0.8333	1	||||||||||	|:||||::||
2242	uaGGUGGGCGGAGUCGGAGGGUUUCAu	|::||:||||::||||||||||||	atCTGCCTGCCTTGGCCTCCCAAAGTg	>hsa_piR_022437|gb|DQ600690|Homo	NM_001164777.2	205	-48.94	2	26	5034	5060	24	0.7917	1	||||||||||	|:||||::||
2243	uaGGUGGGCGGAGUCGGAGGGUUUCAu	||:||:||||::||||||||||||	atCCGCCTGCCTTGGCCTCCCAAAGTg	>hsa_piR_022437|gb|DQ600690|Homo	NM_001164778.2	209	-53.63	2	26	2917	2943	24	0.8333	1	||||||||||	|:||||::||
2244	uaGGUGGGCGGAGUCGGAGGGUUUCAu	|::||:||||::||||||||||||	atCTGCCTGCCTTGGCCTCCCAAAGTg	>hsa_piR_022437|gb|DQ600690|Homo	NM_001164778.2	205	-48.94	2	26	5352	5378	24	0.7917	1	||||||||||	|:||||::||
2245	uaGGUGGGCGGAGUCGGAGGGUUUCAu	||:||:||||::||||||||||||	atCCGCCTGCCTTGGCCTCCCAAAGTg	>hsa_piR_022437|gb|DQ600690|Homo	NM_001164779.2	209	-53.63	2	26	3039	3065	24	0.8333	1	||||||||||	|:||||::||
2246	uaGGUGGGCGGAGUCGGAGGGUUUCAu	|::||:||||::||||||||||||	atCTGCCTGCCTTGGCCTCCCAAAGTg	>hsa_piR_022437|gb|DQ600690|Homo	NM_001164779.2	205	-48.94	2	26	5474	5500	24	0.7917	1	||||||||||	|:||||::||
2247	uaGGUGGGCGGAGUCGGAGGGUUUCAu	||:||:||||::||||||||||||	atCCGCCTGCCTTGGCCTCCCAAAGTg	>hsa_piR_022437|gb|DQ600690|Homo	NM_001164780.2	209	-53.63	2	26	3106	3132	24	0.8333	1	||||||||||	|:||||::||
2248	uaGGUGGGCGGAGUCGGAGGGUUUCAu	|::||:||||::||||||||||||	atCTGCCTGCCTTGGCCTCCCAAAGTg	>hsa_piR_022437|gb|DQ600690|Homo	NM_001164780.2	205	-48.94	2	26	5541	5567	24	0.7917	1	||||||||||	|:||||::||
2249	uaGGUGGGCGGAGUCGGAGGGUUUCAu	||:||:||||::||||||||||||	atCCGCCTGCCTTGGCCTCCCAAAGTg	>hsa_piR_022437|gb|DQ600690|Homo	NM_001164781.1	209	-53.63	2	26	3231	3257	24	0.8333	1	||||||||||	|:||||::||
2250	uaGGUGGGCGGAGUCGGAGGGUUUCAu	|::||:||||::||||||||||||	atCTGCCTGCCTTGGCCTCCCAAAGTg	>hsa_piR_022437|gb|DQ600690|Homo	NM_001164781.1	205	-48.94	2	26	5666	5692	24	0.7917	1	||||||||||	|:||||::||
2251	uaGGUGGGCGGAGUCGGAGGGUUUCAu	||:||:||||::||||||||||||	atCCGCCTGCCTTGGCCTCCCAAAGTg	>hsa_piR_022437|gb|DQ600690|Homo	NM_001164782.2	209	-53.63	2	26	2554	2580	24	0.8333	1	||||||||||	|:||||::||
2252	uaGGUGGGCGGAGUCGGAGGGUUUCAu	|::||:||||::||||||||||||	atCTGCCTGCCTTGGCCTCCCAAAGTg	>hsa_piR_022437|gb|DQ600690|Homo	NM_001164782.2	205	-48.94	2	26	4989	5015	24	0.7917	1	||||||||||	|:||||::||
2253	uaGGUGGGCGGAGUCGGAGGGUUUCAu	|||:|:|||||:||||||||||||	tcCCATCTGCCTCGGCCTCCCAAAGTg	>hsa_piR_022437|gb|DQ600690|Homo	NM_001164824.1	213	-53.91	2	26	2289	2315	24	0.875	1	||||||||||	|:|||||:||
2254	uaGGUGGGCGGAGUCGGAGGGUUUCAu	|||:|:|||||:||||||||||||	tcCCATCTGCCTCGGCCTCCCAAAGTg	>hsa_piR_022437|gb|DQ600690|Homo	NM_001164825.2	213	-53.91	2	26	2194	2220	24	0.875	1	||||||||||	|:|||||:||
2255	uaGGUGGGCGGAGUCGGAGGGUUUCAu	||:||: ||||:||||||||||||	gtCCGCCTTCCTCGGCCTCCCAAAGTg	>hsa_piR_022437|gb|DQ600690|Homo	NM_001164829.2	205	-51.23	2	26	1211	1237	24	0.8333	0.9583	||||||||||	|: ||||:||
2256	uaGGUGGGCGGAGUCGGAGGGUUUCAu	|||||:||||||||||||||||||	atCCACCTGCCTCAGCCTCCCAAAGTg	>hsa_piR_022437|gb|DQ600690|Homo	NM_001164840.2	221	-59.03	2	26	643	669	24	0.9583	1	||||||||||	|:||||||||
2257	uaGGUGGGCGGAGUCGGAGGGUUUCAu	|||||:||||::||||||||||||	gtCCACCTGCCTTGGCCTCCCAAAGTg	>hsa_piR_022437|gb|DQ600690|Homo	NM_001165881.3	213	-53.79	2	26	7846	7872	24	0.875	1	||||||||||	|:||||::||
2258	uaGGUGGGCGGAGUCGGAGGGUUUCAu	||||:: |||::||||||||||||	atCCACTTACCTTGGCCTCCCAAAGTg	>hsa_piR_022437|gb|DQ600690|Homo	NM_001165881.3	201	-45	2	26	11593	11619	24	0.7917	0.9583	||||||||||	:: |||::||
2259	uagguGGGCGGAGUCGGAGGGUUUCAu	|| |||||||||||||||||	gtgatCCACCCTCAGCCTCCCAAAGTg	>hsa_piR_022437|gb|DQ600690|Homo	NM_001165881.3	194	-46.74	2	23	7677	7703	21	0.9048	0.9048	||||||||||	| |||||||
2260	uaGGUGGGCGGAGUCGGAGGGUUUCAu	|||||:||||::||||||||||||	gtCCACCTGCCTTGGCCTCCCAAAGTg	>hsa_piR_022437|gb|DQ600690|Homo	NM_001165882.3	213	-53.79	2	26	7853	7879	24	0.875	1	||||||||||	|:||||::||
2261	uaGGUGGGCGGAGUCGGAGGGUUUCAu	||||:: |||::||||||||||||	atCCACTTACCTTGGCCTCCCAAAGTg	>hsa_piR_022437|gb|DQ600690|Homo	NM_001165882.3	201	-45	2	26	11600	11626	24	0.7917	0.9583	||||||||||	:: |||::||
2262	uagguGGGCGGAGUCGGAGGGUUUCAu	|| |||||||||||||||||	gtgatCCACCCTCAGCCTCCCAAAGTg	>hsa_piR_022437|gb|DQ600690|Homo	NM_001165882.3	194	-46.74	2	23	7684	7710	21	0.9048	0.9048	||||||||||	| |||||||
2263	uaGGUGGGCGGAGUCGGAGGGUUUCAu	|||||:||||::||||||||||||	gtCCACCTGCCTTGGCCTCCCAAAGTg	>hsa_piR_022437|gb|DQ600690|Homo	NM_001165883.2	213	-53.79	2	26	7682	7708	24	0.875	1	||||||||||	|:||||::||
2264	uaGGUGGGCGGAGUCGGAGGGUUUCAu	||||:: |||::||||||||||||	atCCACTTACCTTGGCCTCCCAAAGTg	>hsa_piR_022437|gb|DQ600690|Homo	NM_001165883.2	201	-45	2	26	11429	11455	24	0.7917	0.9583	||||||||||	:: |||::||
2265	uagguGGGCGGAGUCGGAGGGUUUCAu	|| |||||||||||||||||	gtgatCCACCCTCAGCCTCCCAAAGTg	>hsa_piR_022437|gb|DQ600690|Homo	NM_001165883.2	194	-46.74	2	23	7513	7539	21	0.9048	0.9048	||||||||||	| |||||||
2266	uaGGUGGGCGGAGUCGGAGGGUUUCAu	|||||:||||::||||||||||||	gtCCACCTGCCTTGGCCTCCCAAAGTg	>hsa_piR_022437|gb|DQ600690|Homo	NM_001165884.3	213	-53.79	2	26	7481	7507	24	0.875	1	||||||||||	|:||||::||
2267	uaGGUGGGCGGAGUCGGAGGGUUUCAu	||||:: |||::||||||||||||	atCCACTTACCTTGGCCTCCCAAAGTg	>hsa_piR_022437|gb|DQ600690|Homo	NM_001165884.3	201	-45	2	26	11228	11254	24	0.7917	0.9583	||||||||||	:: |||::||
2268	uagguGGGCGGAGUCGGAGGGUUUCAu	|| |||||||||||||||||	gtgatCCACCCTCAGCCTCCCAAAGTg	>hsa_piR_022437|gb|DQ600690|Homo	NM_001165884.3	194	-46.74	2	23	7312	7338	21	0.9048	0.9048	||||||||||	| |||||||
2269	uaGGUGGGCGGAGUCGGAGGGUUUCAu	|||||:||||::||||||||||||	gtCCACCTGCCTTGGCCTCCCAAAGTg	>hsa_piR_022437|gb|DQ600690|Homo	NM_001165885.2	213	-53.79	2	26	7778	7804	24	0.875	1	||||||||||	|:||||::||
2270	uaGGUGGGCGGAGUCGGAGGGUUUCAu	||||:: |||::||||||||||||	atCCACTTACCTTGGCCTCCCAAAGTg	>hsa_piR_022437|gb|DQ600690|Homo	NM_001165885.2	201	-45	2	26	11525	11551	24	0.7917	0.9583	||||||||||	:: |||::||
2271	uagguGGGCGGAGUCGGAGGGUUUCAu	|| |||||||||||||||||	gtgatCCACCCTCAGCCTCCCAAAGTg	>hsa_piR_022437|gb|DQ600690|Homo	NM_001165885.2	194	-46.74	2	23	7609	7635	21	0.9048	0.9048	||||||||||	| |||||||
2272	uaGGUGGGCGGAGUCGGAGGGUUUCAu	|||||:||||::||||||||||||	gtCCACCTGCCTTGGCCTCCCAAAGTg	>hsa_piR_022437|gb|DQ600690|Homo	NM_001165886.2	213	-53.79	2	26	7577	7603	24	0.875	1	||||||||||	|:||||::||
2273	uaGGUGGGCGGAGUCGGAGGGUUUCAu	||||:: |||::||||||||||||	atCCACTTACCTTGGCCTCCCAAAGTg	>hsa_piR_022437|gb|DQ600690|Homo	NM_001165886.2	201	-45	2	26	11324	11350	24	0.7917	0.9583	||||||||||	:: |||::||
2274	uagguGGGCGGAGUCGGAGGGUUUCAu	|| |||||||||||||||||	gtgatCCACCCTCAGCCTCCCAAAGTg	>hsa_piR_022437|gb|DQ600690|Homo	NM_001165886.2	194	-46.74	2	23	7408	7434	21	0.9048	0.9048	||||||||||	| |||||||
2275	uaGGUGGGCGGAGUCGGAGGGUUUCAu	|||||:||||::||||||||||||	gtCCACCTGCCTTGGCCTCCCAAAGTg	>hsa_piR_022437|gb|DQ600690|Homo	NM_001165887.2	213	-53.79	2	26	7810	7836	24	0.875	1	||||||||||	|:||||::||
2276	uaGGUGGGCGGAGUCGGAGGGUUUCAu	||||:: |||::||||||||||||	atCCACTTACCTTGGCCTCCCAAAGTg	>hsa_piR_022437|gb|DQ600690|Homo	NM_001165887.2	201	-45	2	26	11557	11583	24	0.7917	0.9583	||||||||||	:: |||::||
2277	uagguGGGCGGAGUCGGAGGGUUUCAu	|| |||||||||||||||||	gtgatCCACCCTCAGCCTCCCAAAGTg	>hsa_piR_022437|gb|DQ600690|Homo	NM_001165887.2	194	-46.74	2	23	7641	7667	21	0.9048	0.9048	||||||||||	| |||||||
2278	uaGGUGGGCGGAGUCGGAGGGUUUCAu	|||||| ||||:||||||||||||	atCCACCCACCTCGGCCTCCCAAAGTg	>hsa_piR_022437|gb|DQ600690|Homo	NM_001165931.1	213	-55.34	2	26	2884	2910	24	0.9167	0.9583	||||||||||	|| ||||:||
2279	uaGGUGGGCGGAGUCGGAGGGUUUCAu	|||||| |||::||||||||||||	atCCACCCACCTTGGCCTCCCAAAGTg	>hsa_piR_022437|gb|DQ600690|Homo	NM_001166005.2	209	-51.06	2	26	4245	4271	24	0.875	0.9583	||||||||||	|| |||::||
2280	uaGGUGGGCGGAGUCGGAGGGUUUCAu	|||||| |||::||||||||||||	atCCACCCACCTTGGCCTCCCAAAGTg	>hsa_piR_022437|gb|DQ600690|Homo	NM_001166007.2	209	-51.06	2	26	4066	4092	24	0.875	0.9583	||||||||||	|| |||::||
2281	uaGGUGGGCGGAGUCGGAGGGUUUCAu	|||||:||:||:||||||||||||	atCCACCTGCTTCGGCCTCCCAAAGTg	>hsa_piR_022437|gb|DQ600690|Homo	NM_001166036.2	213	-55.44	2	26	4650	4676	24	0.875	1	||||||||||	|:||:||:||
2282	uaGGUGGGCGGAGUCGGAGGGUUUCAu	|||||:||:||:||||||||||||	atCCACCTGCTTCGGCCTCCCAAAGTg	>hsa_piR_022437|gb|DQ600690|Homo	NM_001166037.2	213	-55.44	2	26	4542	4568	24	0.875	1	||||||||||	|:||:||:||
2283	uaGGUGGGCGGAGUCGGAGGGUUUCAu	|||||:||:||:||||||||||||	atCCACCTGCTTCGGCCTCCCAAAGTg	>hsa_piR_022437|gb|DQ600690|Homo	NM_001166038.2	213	-55.44	2	26	4523	4549	24	0.875	1	||||||||||	|:||:||:||
2284	uaGGUGGGCGGAGUCGGAGGGUUUCAu	||:|||||| || |||||||||||	atCCGCCCGCCCCAACCTCCCAAAGTa	>hsa_piR_022437|gb|DQ600690|Homo	NM_001166050.2	205	-50	2	26	7591	7617	24	0.875	0.9167	||||||||||	||||| || |
2285	uaGGUGGGCGGAGUCGGAGGGUUUCAu	||:|||||| || |||||||||||	atCCGCCCGCCCCAACCTCCCAAAGTa	>hsa_piR_022437|gb|DQ600690|Homo	NM_001166051.2	205	-50	2	26	5688	5714	24	0.875	0.9167	||||||||||	||||| || |
2286	uaGGUGGGCGGAGUCGGAGGGUUUCAu	||:|||||| || |||||||||||	atCCGCCCGCCCCAACCTCCCAAAGTa	>hsa_piR_022437|gb|DQ600690|Homo	NM_001166052.2	205	-50	2	26	5682	5708	24	0.875	0.9167	||||||||||	||||| || |
2287	uaGGUGGGCGGAGUCGGAGGGUUUCAu	||:|||||| || |||||||||||	atCCGCCCGCCCCAACCTCCCAAAGTa	>hsa_piR_022437|gb|DQ600690|Homo	NM_001166053.1	205	-50	2	26	5684	5710	24	0.875	0.9167	||||||||||	||||| || |
2288	uaGGUGGGCGGAGUCGGAGGGUUUCAu	||:|||||| || |||||||||||	atCCGCCCGCCCCAACCTCCCAAAGTa	>hsa_piR_022437|gb|DQ600690|Homo	NM_001166054.1	205	-50	2	26	5678	5704	24	0.875	0.9167	||||||||||	||||| || |
2289	uaGGUGGGCGGAGUCGGAGGGUUUCAu	|::|||||||||||||||||||||	atCTGCCCGCCTCAGCCTCCCAAAGTa	>hsa_piR_022437|gb|DQ600690|Homo	NM_001166105.3	217	-56.77	2	26	2214	2240	24	0.9167	1	||||||||||	||||||||||
2290	uaGGUGGGCGGAGUCGGAGGGUUUCAu	|||||| ||||:||||||||||||	atCCACCCACCTCGGCCTCCCAAAGTg	>hsa_piR_022437|gb|DQ600690|Homo	NM_001166135.2	213	-55.34	2	26	7830	7856	24	0.9167	0.9583	||||||||||	|| ||||:||
2291	uaGGUGGGCGGAGUCGGAGGGUUUCAu	||:||| ||||: |||||||||||	atCCGCCCACCTCGACCTCCCAAAGTc	>hsa_piR_022437|gb|DQ600690|Homo	NM_001166135.2	201	-47.38	2	26	3358	3384	24	0.8333	0.9167	||||||||||	|| ||||: |
2292	uaGGUGGGCGGAGUCGGAGGGUUUCAu	||:||:||||::||||||||||||	atCCGCCTGCCTTGGCCTCCCAAAGTg	>hsa_piR_022437|gb|DQ600690|Homo	NM_001166286.2	209	-53.63	2	26	4519	4545	24	0.8333	1	||||||||||	|:||||::||
2293	uagGUGGGCGGAGUCGGAGGGUUUCAu	|::|:|::|||||||||||||||	agaCGTCTGTTTCAGCCTCCCAAAGTg	>hsa_piR_022437|gb|DQ600690|Homo	NM_001166286.2	200	-46.12	2	25	6475	6501	23	0.7826	1	||||||||||	|:|::|||||
2294	uaGGUGGGCGGAGUCGGAGGGUUUCAu	||:||:||||::||||||||||||	atCCGCCTGCCTTGGCCTCCCAAAGTg	>hsa_piR_022437|gb|DQ600690|Homo	NM_001166288.2	209	-53.63	2	26	4491	4517	24	0.8333	1	||||||||||	|:||||::||
2295	uagGUGGGCGGAGUCGGAGGGUUUCAu	|::|:|::|||||||||||||||	agaCGTCTGTTTCAGCCTCCCAAAGTg	>hsa_piR_022437|gb|DQ600690|Homo	NM_001166288.2	200	-46.12	2	25	6447	6473	23	0.7826	1	||||||||||	|:|::|||||
2296	uaGGUGGGCGGAGUCGGAGGGUUUCAu	||||:|||||||||||||||||||	atCCACTCGCCTCAGCCTCCCAAAGTg	>hsa_piR_022437|gb|DQ600690|Homo	NM_001166426.3	221	-58.76	2	26	3413	3439	24	0.9583	1	||||||||||	:|||||||||
2297	uaGGUGGGCGGAGUCGGAGGGUUUCAu	||:||:|||||: |||||||||||	atCCGCCTGCCTCGACCTCCCAAAGTg	>hsa_piR_022437|gb|DQ600690|Homo	NM_001166426.3	205	-52.61	2	26	5619	5645	24	0.8333	0.9583	||||||||||	|:|||||: |
2298	uaGGUGGGCGGAGUCGGAGGGUUUCAu	|| ||||:||| |:||||||||||	atCCTCCCGTCTCTGTCTCCCAAAGTg	>hsa_piR_022437|gb|DQ600690|Homo	NM_001166579.1	201	-48.52	2	26	789	815	24	0.8333	0.9167	||||||||||	|||:||| |:
2299	uaGGUGGGCGGAGUCGGAGGGUUUCAu	||||:|||||:: |||||||||||	atCCACTCGCCTTGCCCTCCCAAAGTg	>hsa_piR_022437|gb|DQ600690|Homo	NM_001167.4	205	-48.93	2	26	3856	3882	24	0.8333	0.9583	||||||||||	:|||||:: |
2300	uaGGUGGGCGGAGUCGGAGGGUUUCAu	:|| :| :||| :||||||||||	ccTCAAGTGATTCA-TCTCCCAAAGTg	>hsa_piR_022437|gb|DQ600690|Homo	NM_001167.4	171	-29.06	2	26	7472	7497	24	0.6667	0.8333	||||||||||	:| :||| :
2301	uaGGUGGGCGGAGUCGGAGGGUUUCAu	|::|||||||||||||||||||||	atCTGCCCGCCTCAGCCTCCCAAAGTg	>hsa_piR_022437|gb|DQ600690|Homo	NM_001167580.3	217	-56.67	2	26	9040	9066	24	0.9167	1	||||||||||	||||||||||
2302	uaGGUGGGCGGAGUCGGAGGGUUUCAu	|||||||||||:||||||||||||	atCCACCCGCCTCGGCCTCCCAAAGTg	>hsa_piR_022437|gb|DQ600690|Homo	NM_001167671.3	221	-61.18	2	26	7943	7969	24	0.9583	1	||||||||||	|||||||:||
2303	uaGGUGGGCGGAGUCGGAGGGUUUCAu	||:||||||||:||||||||||||	atCCGCCCGCCTCGGCCTCCCAAAGTg	>hsa_piR_022437|gb|DQ600690|Homo	NM_001167671.3	217	-60.71	2	26	10640	10666	24	0.9167	1	||||||||||	|||||||:||
2304	uaGGUGGGCGGAGUCGGAGGGUUUCAu	|||||||||||:||||||||||||	atCCACCCGCCTCGGCCTCCCAAAGTg	>hsa_piR_022437|gb|DQ600690|Homo	NM_001167672.3	221	-61.18	2	26	7322	7348	24	0.9583	1	||||||||||	|||||||:||
2305	uaGGUGGGCGGAGUCGGAGGGUUUCAu	||:||||||||:||||||||||||	atCCGCCCGCCTCGGCCTCCCAAAGTg	>hsa_piR_022437|gb|DQ600690|Homo	NM_001167672.3	217	-60.71	2	26	10019	10045	24	0.9167	1	||||||||||	|||||||:||
2306	uaGGUGGGCGGAGUCGGAGGGUUUCAu	:||||:||| ||||||||||||||	atTCACCTGCCACAGCCTCCCAAAGTg	>hsa_piR_022437|gb|DQ600690|Homo	NM_001167738.2	209	-50.91	2	26	10545	10571	24	0.875	0.9583	||||||||||	|:||| ||||
2307	uaGGUGGGCGGAGUCGGAGGGUUUCAu	:||||:|||||:||||||||||||	atTCACCTGCCTCGGCCTCCCAAAGTg	>hsa_piR_022437|gb|DQ600690|Homo	NM_001167741.2	213	-55.55	2	26	3628	3654	24	0.875	1	||||||||||	|:|||||:||
2308	uaGGUGGGCGGAGUCGGAGGGUUUCAu	|||||| :|||:||||||||||||	atCCACCCATCTCGGCCTCCCAAAGTg	>hsa_piR_022437|gb|DQ600690|Homo	NM_001168278.2	209	-53.33	2	26	2545	2571	24	0.875	0.9583	||||||||||	|| :|||:||
2309	uaGGUGGGCGGAGUCGGAGGGUUUCAu	|||||| :|||:||||||||||||	atCCACCCATCTCGGCCTCCCAAAGTg	>hsa_piR_022437|gb|DQ600690|Homo	NM_001168280.3	209	-53.33	2	26	2492	2518	24	0.875	0.9583	||||||||||	|| :|||:||
2310	uaGGUGGGCGGAGUCGGAGGGUUUCAu	|||||||||||:||||||||||||	atCCACCCGCCTCGGCCTCCCAAAGTg	>hsa_piR_022437|gb|DQ600690|Homo	NM_001168335.2	221	-61.18	2	26	7941	7967	24	0.9583	1	||||||||||	|||||||:||
2311	uaGGUGGGCGGAGUCGGAGGGUUUCAu	||| || |||||||||||||||||	atCCAACCACCTCAGCCTCCCAAAGTg	>hsa_piR_022437|gb|DQ600690|Homo	NM_001168335.2	209	-49.12	2	26	5332	5358	24	0.9167	0.9167	||||||||||	|| |||||||
2312	uaGGUGGGCGGAGUCGGAGGGUUUCAu	|||||| |:|::||||||||||||	atCCACCCACTTTGGCCTCCCAAAGTg	>hsa_piR_022437|gb|DQ600690|Homo	NM_001168335.2	205	-48.12	2	26	3683	3709	24	0.8333	0.9583	||||||||||	|| |:|::||
2313	uaGGUGGGCGGAGUCGGAGGGUUUCAu	||:||| |:|||||||||||||||	atCCGCCCACTTCAGCCTCCCAAAGTg	>hsa_piR_022437|gb|DQ600690|Homo	NM_001168342.2	209	-52.58	2	26	8873	8899	24	0.875	0.9583	||||||||||	|| |:|||||
2314	uaGGUGGGCGGAGUCGGAGGGUUUCAu	|:: ||||||::||||||||||||	atCTGGCCGCCTTGGCCTCCCAAAGTg	>hsa_piR_022437|gb|DQ600690|Homo	NM_001168342.2	201	-46.86	2	26	6467	6493	24	0.7917	0.9583	||||||||||	||||||::||
2315	uaGGUGGGCGGAGUCGGAGGGUUUCAu	:||||| |||::||||||||||||	atTCACCCACCTTGGCCTCCCAAAGTg	>hsa_piR_022437|gb|DQ600690|Homo	NM_001170543.2	205	-48.23	2	26	1919	1945	24	0.8333	0.9583	||||||||||	|| |||::||
2316	uaGGUGGGCGGAGUCGGAGGGUUUCAu	:||||| |||::||||||||||||	atTCACCCACCTTGGCCTCCCAAAGTg	>hsa_piR_022437|gb|DQ600690|Homo	NM_001170544.2	205	-48.23	2	26	1916	1942	24	0.8333	0.9583	||||||||||	|| |||::||
2317	uaGGUGGGCGGAGUCGGAGGGUUUCAu	|||||| ||| :||||||||||||	atCCACCCACCTAGGCCTCCCAAAGTg	>hsa_piR_022437|gb|DQ600690|Homo	NM_001170569.1	205	-49.03	2	26	1247	1273	24	0.875	0.9167	||||||||||	|| ||| :||
2318	uaGGUGGGCGGAGUCGGAGGGUUUCAu	|||||| ||| :||||||||||||	atCCACCCACCTAGGCCTCCCAAAGTg	>hsa_piR_022437|gb|DQ600690|Homo	NM_001170570.2	205	-49.03	2	26	1098	1124	24	0.875	0.9167	||||||||||	|| ||| :||
2319	uaGGUGGGCGGAGUCGGAGGGUUUCAu	|||||:||||::||||||||||||	atCCACCTGCCTTGGCCTCCCAAAGTg	>hsa_piR_022437|gb|DQ600690|Homo	NM_001170634.1	213	-54.1	2	26	3056	3082	24	0.875	1	||||||||||	|:||||::||
2320	uaGGUGGGCGGAGUCGGAGGGUUUCAu	|::||:||||||||||||||||||	acCTGCCTGCCTCAGCCTCCCAAAGTg	>hsa_piR_022437|gb|DQ600690|Homo	NM_001170634.1	213	-53.72	2	26	4131	4157	24	0.875	1	||||||||||	|:||||||||
2321	uaGGUG-GGCGGAGUCGGAGGGUUUCAu	|::| ||| | ::||||||||||||	gcCTGCTCCGACCTGGCCTCCCAAAGTg	>hsa_piR_022437|gb|DQ600690|Homo	NM_001170738.2	184	-41.29	2	26	714	741	25	0.72	0.88	||||||||||	||| | ::||
2322	uaGGUGGGCGGAGUCGGAGGGUUUCAu	||:||| |||::||||||||||||	atCCGCCCACCTTGGCCTCCCAAAGTg	>hsa_piR_022437|gb|DQ600690|Homo	NM_001170781.2	205	-50.59	2	26	690	716	24	0.8333	0.9583	||||||||||	|| |||::||
2323	uaGGUGGGCGGAGUCGGAGGGUUUCAu	|||||:||||::||||||||||||	atCCACCTGCCTTGGCCTCCCAAAGTg	>hsa_piR_022437|gb|DQ600690|Homo	NM_001170937.1	213	-54.1	2	26	3047	3073	24	0.875	1	||||||||||	|:||||::||
2324	uaGGUGGGCGGAGUCGGAGGGUUUCAu	|::||:||||||||||||||||||	acCTGCCTGCCTCAGCCTCCCAAAGTg	>hsa_piR_022437|gb|DQ600690|Homo	NM_001170937.1	213	-53.72	2	26	4122	4148	24	0.875	1	||||||||||	|:||||||||
2325	uaggUGGGCGGAGUCGGAGGGUUUCAu	:||:| ||| |||||||||||	caagGCCTG-GTCAACCTCCCAAAGTc	>hsa_piR_022437|gb|DQ600690|Homo	NM_001171092.1	177	-30	2	24	1145	1170	22	0.7727	0.8636	||||||||||	|:| ||| |
2326	uaggUGGGCGGAGUCGGAGGGUUUCAu	:||:| ||| |||||||||||	caagGCCTG-GTCAACCTCCCAAAGTc	>hsa_piR_022437|gb|DQ600690|Homo	NM_001171095.1	177	-30	2	24	914	939	22	0.7727	0.8636	||||||||||	|:| ||| |
2327	uaggUG-GGCGGAGUCG-GAGGGUUUCAu	|| |||| ||| | ||||||||||	cgaaACACCGCATCATCTCTCCCAAAGTg	>hsa_piR_022437|gb|DQ600690|Homo	NM_001171166.2	181	-32.75	2	24	786	814	24	0.8333	0.8333	||||||||||	||| ||| |
2328	uaggUG-GGCGGAGUCG-GAGGGUUUCAu	|| |||| ||| | ||||||||||	cgaaACACCGCATCATCTCTCCCAAAGTg	>hsa_piR_022437|gb|DQ600690|Homo	NM_001171167.2	181	-32.75	2	24	1306	1334	24	0.8333	0.8333	||||||||||	||| ||| |
2329	uaggUG-GGCGGAGUCG-GAGGGUUUCAu	|| |||| ||| | ||||||||||	cgaaACACCGCATCATCTCTCCCAAAGTg	>hsa_piR_022437|gb|DQ600690|Homo	NM_001171168.2	181	-32.75	2	24	1234	1262	24	0.8333	0.8333	||||||||||	||| ||| |
2330	uaGGUGGGCGGAGUCGGAGGGUUUCAu	|: ||:|||||:||||||||||||	atCTTCCTGCCTCGGCCTCCCAAAGTg	>hsa_piR_022437|gb|DQ600690|Homo	NM_001171192.1	205	-50.76	2	26	1722	1748	24	0.8333	0.9583	||||||||||	|:|||||:||
2331	uaGGUGGGCGGAGUCGGAGGGUUUCAu	|| ||:||||||||||||||||||	atCCTCCTGCCTCAGCCTCCCAAAGTg	>hsa_piR_022437|gb|DQ600690|Homo	NM_001171506.2	213	-54.64	2	26	202	228	24	0.9167	0.9583	||||||||||	|:||||||||
2332	uaGGUGGGCGGAGUCGGAGGGUUUCAu	||:||||||||:||||||||||||	atCCGCCCGCCTCGGCCTCCCAAAGTg	>hsa_piR_022437|gb|DQ600690|Homo	NM_001171660.1	217	-60.71	2	26	2587	2613	24	0.9167	1	||||||||||	|||||||:||
2333	uaGGUGGGCGGAGUCGGAGGGUUUCAu	||:||||||||:||||||||||||	atCCGCCCGCCTCGGCCTCCCAAAGTg	>hsa_piR_022437|gb|DQ600690|Homo	NM_001171661.1	217	-60.71	2	26	2507	2533	24	0.9167	1	||||||||||	|||||||:||
2334	uaGGUGGGCGGAGUCGGAGGGUUUCAu	|::|||||||||||||||||||||	atCTGCCCGCCTCAGCCTCCCAAAGTg	>hsa_piR_022437|gb|DQ600690|Homo	NM_001171979.2	217	-56.67	2	26	2500	2526	24	0.9167	1	||||||||||	||||||||||
2335	uaGGUGGGCGGAGUCGGAGGGUUUCAu	|||||:|| |||||||||||||||	atCCACCTGCGTCAGCCTCCCAAAGTg	>hsa_piR_022437|gb|DQ600690|Homo	NM_001172086.1	213	-53.86	2	26	2053	2079	24	0.9167	0.9583	||||||||||	|:|| |||||
2336	uaGGUGGGCGGAGUCGGAGGGUUUCAu	|| ||: || ::||||||||||||	gtCCTCCTACCCTGGCCTCCCAAAGTt	>hsa_piR_022437|gb|DQ600690|Homo	NM_001172086.1	189	-39.51	2	26	3394	3420	24	0.75	0.875	||||||||||	|: || ::||
2337	uaGGUGGGCGGAGUCGGAGGGUUUCAu	|||||:|| |||||||||||||||	atCCACCTGCGTCAGCCTCCCAAAGTg	>hsa_piR_022437|gb|DQ600690|Homo	NM_001172087.1	213	-53.86	2	26	1911	1937	24	0.9167	0.9583	||||||||||	|:|| |||||
2338	uaGGUGGGCGGAGUCGGAGGGUUUCAu	|| ||: || ::||||||||||||	gtCCTCCTACCCTGGCCTCCCAAAGTt	>hsa_piR_022437|gb|DQ600690|Homo	NM_001172087.1	189	-39.51	2	26	3252	3278	24	0.75	0.875	||||||||||	|: || ::||
2339	uaggUG-GGCGG-AGUCG-GAGGGUUUCAu	|| ||||| ::|| ||||||||||	ctggACACCGCCAATGGCACTCCCAAAGTt	>hsa_piR_022437|gb|DQ600690|Homo	NM_001172128.2	172	-33.71	2	24	2641	2670	25	0.76	0.84	||||||||||	||| ::||
2340	uaGGUGGGCGGAGUCGGAGGGUUUCAu	||:||:|||||:||||||||||||	atCCGCCTGCCTCGGCCTCCCAAAGTg	>hsa_piR_022437|gb|DQ600690|Homo	NM_001172655.1	213	-57.91	2	26	278	304	24	0.875	1	||||||||||	|:|||||:||
2341	uaGGUGGGCGGAGUCGGAGGGUUUCAu	||| || |||||||||||||||	atCCAAGAGCATCAGCCTCCCAAAGTg	>hsa_piR_022437|gb|DQ600690|Homo	NM_001172655.1	193	-41.37	2	26	4645	4671	24	0.8333	0.8333	||||||||||	|| |||||
2342	uaGGUGGGCGGAGUCGGAGGGUUUCAu	|||||| |||::||||||||||||	atCCACCCACCTTGGCCTCCCAAAGTg	>hsa_piR_022437|gb|DQ600690|Homo	NM_001172681.2	209	-51.06	2	26	6808	6834	24	0.875	0.9583	||||||||||	|| |||::||
2343	uaGGUGGGCGGAGUCGGAGGGUUUCAu	|||||| |||::||||||||||||	atCCACCCACCTTGGCCTCCCAAAGTg	>hsa_piR_022437|gb|DQ600690|Homo	NM_001172682.2	209	-51.06	2	26	6686	6712	24	0.875	0.9583	||||||||||	|| |||::||
2344	uaGGUGGGCGGAGUCGGAGGGUUUCAu	|::||| |||::||||||||||||	atCTGCCCACCTTGGCCTCCCAAAGTg	>hsa_piR_022437|gb|DQ600690|Homo	NM_001172775.2	201	-45.9	2	26	4474	4500	24	0.7917	0.9583	||||||||||	|| |||::||
2345	uaGGUGGGCGGAGUCGGAGGGUUUCAu	||:||||||||:||||||||||||	atCCGCCCGCCTCGGCCTCCCAAAGTg	>hsa_piR_022437|gb|DQ600690|Homo	NM_001172813.2	217	-60.71	2	26	200	226	24	0.9167	1	||||||||||	|||||||:||
2346	uaGGUGGGCGGAGUCGGAGGGUUUCAu	|| ||| ||||:||||||||||||	gtCCTCCCACCTCGGCCTCCCAAAGTg	>hsa_piR_022437|gb|DQ600690|Homo	NM_001173454.2	205	-50.64	2	26	222	248	24	0.875	0.9167	||||||||||	|| ||||:||
2347	uaGGUGGGCGGAGUCGGAGGGUUUCAu	|| ||: |||::||||||||||||	atCCTCCTACCTTGGCCTCCCAAAGTg	>hsa_piR_022437|gb|DQ600690|Homo	NM_001173486.2	197	-43.72	2	26	462	488	24	0.7917	0.9167	||||||||||	|: |||::||
2348	uaGGUGGGCGGAGUCGGAGGGUUUCAu	|||||||:||::||||||||||||	atCCACCCGTCTTGGCCTCCCAAAGTg	>hsa_piR_022437|gb|DQ600690|Homo	NM_001173516.1	213	-54.61	2	26	3434	3460	24	0.875	1	||||||||||	|||:||::||
2349	uaGGUGGGCGGAGUCGGAGGGUUUCAu	|::||:||||||||||||||||||	atCTGCCTGCCTCAGCCTCCCAAAGTg	>hsa_piR_022437|gb|DQ600690|Homo	NM_001173517.1	213	-53.87	2	26	3877	3903	24	0.875	1	||||||||||	|:||||||||
2350	uaGGUGGGCGGAGUCGGAGGGUUUCAu	| :||:||||::||||||||||||	atCGGCCTGCCTTGGCCTCCCAAAGTg	>hsa_piR_022437|gb|DQ600690|Homo	NM_001174103.2	201	-48.36	2	26	1904	1930	24	0.7917	0.9583	||||||||||	|:||||::||
2351	uaGGUGGGCGGAGUCGGAGGGUUUCAu	|:|||:||||||||||||||||||	atCTACCTGCCTCAGCCTCCCAAAGTg	>hsa_piR_022437|gb|DQ600690|Homo	NM_001174126.2	217	-56.32	2	26	3248	3274	24	0.9167	1	||||||||||	|:||||||||
2352	uaGGUGGGCGGAGUCGGAGGGUUUCAu	|::|: ||||::||||||||||||	atCTGCTGGCCTTGGCCTCCCAAAGTg	>hsa_piR_022437|gb|DQ600690|Homo	NM_001174126.2	197	-43.67	2	26	3542	3568	24	0.75	0.9583	||||||||||	: ||||::||
2353	uaGGUGGGCGGAGUCGGAGGGUUUCAu	|:|||:||||||||||||||||||	atCTACCTGCCTCAGCCTCCCAAAGTg	>hsa_piR_022437|gb|DQ600690|Homo	NM_001174127.2	217	-56.32	2	26	3243	3269	24	0.9167	1	||||||||||	|:||||||||
2354	uaGGUGGGCGGAGUCGGAGGGUUUCAu	|::|: ||||::||||||||||||	atCTGCTGGCCTTGGCCTCCCAAAGTg	>hsa_piR_022437|gb|DQ600690|Homo	NM_001174127.2	197	-43.67	2	26	3537	3563	24	0.75	0.9583	||||||||||	: ||||::||
2355	uaGGUGGGCGGAGUCGGAGGGUUUCAu	||:||:|||||:||||||||||||	atCCGCCTGCCTCGGCCTCCCAAAGTg	>hsa_piR_022437|gb|DQ600690|Homo	NM_001174146.2	213	-57.91	2	26	3406	3432	24	0.875	1	||||||||||	|:|||||:||
2356	uaGGUGGGCGGAGUCGGAGGGUUUCAu	||:||:|||||:||||||||||||	atCCGCCTGCCTCGGCCTCCCAAAGTg	>hsa_piR_022437|gb|DQ600690|Homo	NM_001174147.2	213	-57.91	2	26	3394	3420	24	0.875	1	||||||||||	|:|||||:||
2357	uaGGUGGGCGGAGUCGGAGGGUUUCAu	|::||| ||||:||||||||||||	atCTGCCCTCCTCGGCCTCCCAAAGTg	>hsa_piR_022437|gb|DQ600690|Homo	NM_001177547.3	205	-49.79	2	26	2236	2262	24	0.8333	0.9583	||||||||||	|| ||||:||
2358	uaGGUGGGCGGAGUCGGAGGGUUUCAu	|::||| ||||:||||||||||||	atCTGCCCTCCTCGGCCTCCCAAAGTg	>hsa_piR_022437|gb|DQ600690|Homo	NM_001177548.3	205	-49.79	2	26	2343	2369	24	0.8333	0.9583	||||||||||	|| ||||:||
2359	uaGGUGGGCGGAGUCGGAGGGUUUCAu	|::||| ||||:||||||||||||	atCTGCCCTCCTCGGCCTCCCAAAGTg	>hsa_piR_022437|gb|DQ600690|Homo	NM_001177549.3	205	-49.79	2	26	2183	2209	24	0.8333	0.9583	||||||||||	|| ||||:||
2360	uaGGUGGGCGGAGUCGGAGGGUUUCAu	||||||||||::||||||||||||	atCCACCCGCCTTGGCCTCCCAAAGTg	>hsa_piR_022437|gb|DQ600690|Homo	NM_001177643.2	217	-56.9	2	26	74	100	24	0.9167	1	||||||||||	||||||::||
2361	uaGGUGGGCGGAGUCGGAGGGUUUCAu	||:||:|||||:||||||||||||	atCCGCCTGCCTCGGCCTCCCAAAGTg	>hsa_piR_022437|gb|DQ600690|Homo	NM_001177663.2	213	-57.91	2	26	10061	10087	24	0.875	1	||||||||||	|:|||||:||
2362	uaGGUGGGCGGAGUCGGAGGGUUUCAu	||:||:|||||:||||||||||||	atCCGCCTGCCTCGGCCTCCCAAAGTg	>hsa_piR_022437|gb|DQ600690|Homo	NM_001177664.2	213	-57.91	2	26	9967	9993	24	0.875	1	||||||||||	|:|||||:||
2363	uaGGUGGGCGGAGUCGGAGGGUUUCAu	||:||:|||||:||||||||||||	atCCGCCTGCCTCGGCCTCCCAAAGTg	>hsa_piR_022437|gb|DQ600690|Homo	NM_001177665.2	213	-57.91	2	26	10441	10467	24	0.875	1	||||||||||	|:|||||:||
2364	uaGGUGGGCGGAGUCGGAGGGUUUCAu	|||||||||||:||||||||||||	atCCACCCGCCTCGGCCTCCCAAAGTg	>hsa_piR_022437|gb|DQ600690|Homo	NM_001177800.2	221	-61.18	2	26	4339	4365	24	0.9583	1	||||||||||	|||||||:||
2365	uaGGUGGGCGGAGUCGGAGGGUUUCAu	|||||||||||: |||||||||||	atCCACCCGCCTCGACCTCCCAAAGTg	>hsa_piR_022437|gb|DQ600690|Homo	NM_001177800.2	213	-55.88	2	26	1823	1849	24	0.9167	0.9583	||||||||||	|||||||: |
2366	uaGGUGGGCGGAGUCGGAGGGUUUCAu	||:||| |||||||||||||||||	atCCGCCCACCTCAGCCTCCCAAAGTg	>hsa_piR_022437|gb|DQ600690|Homo	NM_001177998.2	213	-55.52	2	26	3984	4010	24	0.9167	0.9583	||||||||||	|| |||||||
2367	uaGGUGGGCGGAGUCGGAGGGUUUCAu	||:||| |||||||||||||||||	atCCGCCCACCTCAGCCTCCCAAAGTg	>hsa_piR_022437|gb|DQ600690|Homo	NM_001177999.1	213	-55.52	2	26	4045	4071	24	0.9167	0.9583	||||||||||	|| |||||||
2368	uaGGUGGGCGGAGUCGGAGGGUUUCAu	|::| |||||:: |||||||||||	atCTGCACGCCTTGACCTCCCAAAGTg	>hsa_piR_022437|gb|DQ600690|Homo	NM_001178083.2	193	-40.29	2	26	5596	5622	24	0.75	0.9167	||||||||||	|||||:: |
2369	uaGGUGGGCGGAGUCGGAGGGUUUCAu	|||||| |||::||||||||||||	atCCACCCACCTTGGCCTCCCAAAGTg	>hsa_piR_022437|gb|DQ600690|Homo	NM_001178096.1	209	-51.06	2	26	1557	1583	24	0.875	0.9583	||||||||||	|| |||::||
2370	uaGGUGGGCGGAGUCGGAGGGUUUCAu	|||||| :|||:||||||||||||	atCCACCCCTCTCGGCCTCCCAAAGTg	>hsa_piR_022437|gb|DQ600690|Homo	NM_001178138.2	209	-52.68	2	26	5463	5489	24	0.875	0.9583	||||||||||	|| :|||:||
2371	uaGGUGGGCGGAGUCGGAGGGUUUCAu	|::||:|||||:||||||||||||	atCTGCCTGCCTCGGCCTCCCAAAGTg	>hsa_piR_022437|gb|DQ600690|Homo	NM_001178138.2	209	-53.22	2	26	7538	7564	24	0.8333	1	||||||||||	|:|||||:||
2372	uaGGUGGGCGGAGUCGGAGGGUUUCAu	|||||| :|||:||||||||||||	atCCACCCCTCTCGGCCTCCCAAAGTg	>hsa_piR_022437|gb|DQ600690|Homo	NM_001178139.2	209	-52.68	2	26	5425	5451	24	0.875	0.9583	||||||||||	|| :|||:||
2373	uaGGUGGGCGGAGUCGGAGGGUUUCAu	|::||:|||||:||||||||||||	atCTGCCTGCCTCGGCCTCCCAAAGTg	>hsa_piR_022437|gb|DQ600690|Homo	NM_001178139.2	209	-53.22	2	26	7500	7526	24	0.8333	1	||||||||||	|:|||||:||
2374	uaGGUGGGCGGAGUCGGAGGGUUUCAu	|||||| :|||:||||||||||||	atCCACCCCTCTCGGCCTCCCAAAGTg	>hsa_piR_022437|gb|DQ600690|Homo	NM_001178140.2	209	-52.68	2	26	4905	4931	24	0.875	0.9583	||||||||||	|| :|||:||
2375	uaGGUGGGCGGAGUCGGAGGGUUUCAu	|::||:|||||:||||||||||||	atCTGCCTGCCTCGGCCTCCCAAAGTg	>hsa_piR_022437|gb|DQ600690|Homo	NM_001178140.2	209	-53.22	2	26	6980	7006	24	0.8333	1	||||||||||	|:|||||:||
2376	uaGGUGGGCGGAGUCGGAGGGUUUCAu	|||||| :|||:||||||||||||	atCCACCCCTCTCGGCCTCCCAAAGTg	>hsa_piR_022437|gb|DQ600690|Homo	NM_001178141.2	209	-52.68	2	26	4815	4841	24	0.875	0.9583	||||||||||	|| :|||:||
2377	uaGGUGGGCGGAGUCGGAGGGUUUCAu	|::||:|||||:||||||||||||	atCTGCCTGCCTCGGCCTCCCAAAGTg	>hsa_piR_022437|gb|DQ600690|Homo	NM_001178141.2	209	-53.22	2	26	6890	6916	24	0.8333	1	||||||||||	|:|||||:||
2378	uaGGUGGGCGGAGUCGGAGGGUUUCAu	|||||| :|||:||||||||||||	atCCACCCCTCTCGGCCTCCCAAAGTg	>hsa_piR_022437|gb|DQ600690|Homo	NM_001178142.2	209	-52.68	2	26	4663	4689	24	0.875	0.9583	||||||||||	|| :|||:||
2379	uaGGUGGGCGGAGUCGGAGGGUUUCAu	|::||:|||||:||||||||||||	atCTGCCTGCCTCGGCCTCCCAAAGTg	>hsa_piR_022437|gb|DQ600690|Homo	NM_001178142.2	209	-53.22	2	26	6738	6764	24	0.8333	1	||||||||||	|:|||||:||
2380	uaGGUGGGCGGAGUCGGAGGGUUUCAu	|||||||:|||:||||||||||||	aaCCACCCGTCTCGGCCTCCCAAAGTg	>hsa_piR_022437|gb|DQ600690|Homo	NM_001184700.2	217	-57.76	2	26	1782	1808	24	0.9167	1	||||||||||	|||:|||:||
2381	uaGGUGGGCGGAGUCGGAGGGUUUCAu	|||||||:|||:||||||||||||	aaCCACCCGTCTCGGCCTCCCAAAGTg	>hsa_piR_022437|gb|DQ600690|Homo	NM_001184701.2	217	-57.76	2	26	1814	1840	24	0.9167	1	||||||||||	|||:|||:||
2382	uaGGUGGGCGGAGUCGGAGGGUUUCAu	:||||| |||||||||||||||||	atTCACCCACCTCAGCCTCCCAAAGTg	>hsa_piR_022437|gb|DQ600690|Homo	NM_001184703.1	213	-53.16	2	26	344	370	24	0.9167	0.9583	||||||||||	|| |||||||
2383	uaGGUGGGCGGAGUCGGAGGGUUUCAu	||:|||||||||||||||||||||	atCCGCCCGCCTCAGCCTCCCAAAGTg	>hsa_piR_022437|gb|DQ600690|Homo	NM_001184722.1	221	-61.36	2	26	3304	3330	24	0.9583	1	||||||||||	||||||||||
2384	uaGGUGGGCGGAGUCGGAGGGUUUCAu	||:||:||:|::||||||||||||	atCCGCCTGCTTTGGCCTCCCAAAGTg	>hsa_piR_022437|gb|DQ600690|Homo	NM_001184722.1	205	-50.69	2	26	3892	3918	24	0.7917	1	||||||||||	|:||:|::||
2385	uagGUG-GGCGGAGUCGGAGGGUUUCAu	||: |:|:: :| |||||||||||	ataCATGCTGTTGTACCCTCCCAAAGTa	>hsa_piR_022437|gb|DQ600690|Homo	NM_001184743.1	175	-30.8	2	25	2926	2953	24	0.6667	0.875	||||||||||	|:|:: :| |
2386	uaggugggcGGAGUCGGAGGGUUUCAu	|:|| |||||||||||	agcagaagaCTTCCTCCTCCCAAAGTt	>hsa_piR_022437|gb|DQ600690|Homo	NM_001184772.3	170	-27.4	2	19	4573	4599	17	0.8235	0.8824	||||||||||	|:|| |
2387	uaGGUGGGCGGAGUCGGAGGGUUUCAu	||||:|||:||:||||||||||||	atCCACTCGCTTCGGCCTCCCAAAGTg	>hsa_piR_022437|gb|DQ600690|Homo	NM_001184819.2	213	-55.17	2	26	3680	3706	24	0.875	1	||||||||||	:|||:||:||
2388	uaGGUGGGCGGAGUCGGAGGGUUUCAu	|| ||:||||||||||||||||||	atCCTCCTGCCTCAGCCTCCCAAAGTg	>hsa_piR_022437|gb|DQ600690|Homo	NM_001184819.2	213	-54.64	2	26	6040	6066	24	0.9167	0.9583	||||||||||	|:||||||||
2389	uaGGUGGGCGGAGUCGGAGGGUUUCAu	|||||| ||||:||||||||||||	atCCACCCACCTCGGCCTCCCAAAGTg	>hsa_piR_022437|gb|DQ600690|Homo	NM_001184819.2	213	-55.34	2	26	6369	6395	24	0.9167	0.9583	||||||||||	|| ||||:||
2390	uagGUGGGCGGAGUCGGAGGGUUUCAu	||||||:||:|||||||||||||	ataCACCCGTCTTAGCCTCCCAAAGTt	>hsa_piR_022437|gb|DQ600690|Homo	NM_001184819.2	212	-50.88	2	25	7455	7481	23	0.913	1	||||||||||	|||:||:|||
2391	uaGGUGGGCGGAGUCGGAGGGUUUCAu	|| ||| :|||:|:||||||||||	atCCTCCCATCTCGGTCTCCCAAAGTg	>hsa_piR_022437|gb|DQ600690|Homo	NM_001184819.2	197	-46.65	2	26	6969	6995	24	0.7917	0.9167	||||||||||	|| :|||:|:
2392	uaGGUGGGCGGAGUCGGAGGGUUUCAu	|||||| |||||||||||||||||	atCCACCCACCTCAGCCTCCCAAAGTg	>hsa_piR_022437|gb|DQ600690|Homo	NM_001184900.3	217	-55.99	2	26	4623	4649	24	0.9583	0.9583	||||||||||	|| |||||||
2393	uaGGUGGGCGGAGUCGGAGGGUUUCAu	|||||| |||||||||||||||||	atCCACCCACCTCAGCCTCCCAAAGTg	>hsa_piR_022437|gb|DQ600690|Homo	NM_001184901.1	217	-55.99	2	26	4241	4267	24	0.9583	0.9583	||||||||||	|| |||||||
2394	uaGGUGGGCGGAGUCGGAGGGUUUCAu	|||||| |||||||||||||||||	atCCACCCACCTCAGCCTCCCAAAGTg	>hsa_piR_022437|gb|DQ600690|Homo	NM_001184902.2	217	-55.99	2	26	4481	4507	24	0.9583	0.9583	||||||||||	|| |||||||
2395	uaGGUGGGCGGAGUCGGAGGGUUUCAu	|||||| |||||||||||||||||	atCCACCCACCTCAGCCTCCCAAAGTg	>hsa_piR_022437|gb|DQ600690|Homo	NM_001184903.1	217	-55.99	2	26	4249	4275	24	0.9583	0.9583	||||||||||	|| |||||||
2396	uaGGUGGGCGGAGUCGGAGGGUUUCAu	|||||:||||||||||||||||||	atCCACCTGCCTCAGCCTCCCAAAGTg	>hsa_piR_022437|gb|DQ600690|Homo	NM_001184906.2	221	-59.03	2	26	3137	3163	24	0.9583	1	||||||||||	|:||||||||
2397	uaGGUGGGCGGAGUCGGAGGGUUUCAu	|||||||||||:||||||||||||	atCCACCCGCCTCGGCCTCCCAAAGTg	>hsa_piR_022437|gb|DQ600690|Homo	NM_001184906.2	221	-61.18	2	26	7683	7709	24	0.9583	1	||||||||||	|||||||:||
2398	uaGGUGGGCGGAGUCGGAGGGUUUCAu	|||||:||||::||||||||||||	gtCCACCTGCCTTGGCCTCCCAAAGTg	>hsa_piR_022437|gb|DQ600690|Homo	NM_001184906.2	213	-53.79	2	26	6800	6826	24	0.875	1	||||||||||	|:||||::||
2399	uaGGUGGGCGGAGUCGGAGGGUUUCAu	|||||| ||||:||||||||||||	atCCACCCACCTCGGCCTCCCAAAGTg	>hsa_piR_022437|gb|DQ600690|Homo	NM_001185039.2	213	-55.34	2	26	6789	6815	24	0.9167	0.9583	||||||||||	|| ||||:||
2400	uaGGU-GGGCGGAGUCGGAGGGUUUCAu	:|| ::|||||||||||||||||||	gaTCATTTCGCCTCAGCCTCCCAAAGTg	>hsa_piR_022437|gb|DQ600690|Homo	NM_001185039.2	204	-49.77	2	26	4988	5015	25	0.84	0.96	||||||||||	:|||||||||
2401	uaGGUGGGCGGAGUCGGAGGGUUUCAu	|| ||||||||:||||||||||||	atCCTCCCGCCTCGGCCTCCCAAAGTg	>hsa_piR_022437|gb|DQ600690|Homo	NM_001185056.2	213	-56.79	2	26	1134	1160	24	0.9167	0.9583	||||||||||	|||||||:||
2402	uagguGGGCGGAGUCGGAGGGUUUCAu	:| ||| ||||||||||||||	tcgtcTCAGCC-CAGCCTCCCAAAGTg	>hsa_piR_022437|gb|DQ600690|Homo	NM_001185080.1	184	-41.41	2	23	350	375	21	0.8571	0.9048	||||||||||	| ||| ||||
2403	uaGGUGGGCGGAGUCGGAGGGUUUCAu	|::||:|||||:||||||||||||	atCTGCCTGCCTCGGCCTCCCAAAGTg	>hsa_piR_022437|gb|DQ600690|Homo	NM_001190214.1	209	-53.22	2	26	3560	3586	24	0.8333	1	||||||||||	|:|||||:||
2404	uaGGUGGGCGGAGUCGGAGGGUUUCAu	|| |||||||||||||||||||||	gtCCTCCCGCCTCAGCCTCCCAAAGTa	>hsa_piR_022437|gb|DQ600690|Homo	NM_001190233.1	217	-57.23	2	26	1199	1225	24	0.9583	0.9583	||||||||||	||||||||||
2405	uaGGUGGGCGGAGUCGGAGGGUUUCAu	||:|||||||| ||||||||||||	atCCGCCCGCCTCTGCCTCCCAAAGTg	>hsa_piR_022437|gb|DQ600690|Homo	NM_001190383.3	213	-57.02	2	26	4379	4405	24	0.9167	0.9583	||||||||||	||||||| ||
2406	uaGGUGGGCGGAGUCGGAGGGUUUCAu	||:|||||||| ||||||||||||	atCCGCCCGCCTCTGCCTCCCAAAGTg	>hsa_piR_022437|gb|DQ600690|Homo	NM_001190384.3	213	-57.02	2	26	4242	4268	24	0.9167	0.9583	||||||||||	||||||| ||
2407	uaGGUGGGCGGAGUCGGAGGGUUUCAu	||:|||||||| ||||||||||||	atCCGCCCGCCTCTGCCTCCCAAAGTg	>hsa_piR_022437|gb|DQ600690|Homo	NM_001190388.2	213	-57.02	2	26	4352	4378	24	0.9167	0.9583	||||||||||	||||||| ||
2408	uaGGUGGGCGGAGUCGGAGGGUUUCAu	|::||||||||:||||||||||||	atCTGCCCGCCTCGGCCTCCCAAAGTg	>hsa_piR_022437|gb|DQ600690|Homo	NM_001190411.1	213	-56.02	2	26	1935	1961	24	0.875	1	||||||||||	|||||||:||
2409	uaGGUGGGCGGAGUCGGAGGGUUUCAu	|::||||||||:||||||||||||	atCTGCCCGCCTCGGCCTCCCAAAGTg	>hsa_piR_022437|gb|DQ600690|Homo	NM_001190412.2	213	-56.02	2	26	1989	2015	24	0.875	1	||||||||||	|||||||:||
2410	uaGGUGGGCGGAGUCGGAGGGUUUCAu	|::||||||||:||||||||||||	atCTGCCCGCCTCGGCCTCCCAAAGTg	>hsa_piR_022437|gb|DQ600690|Homo	NM_001190413.2	213	-56.02	2	26	1813	1839	24	0.875	1	||||||||||	|||||||:||
2411	uaGGUGGGCGGAGUCGGAGGGUUUCAu	||:|||||||||||||||||||||	atCCGCCCGCCTCAGCCTCCCAAAGTg	>hsa_piR_022437|gb|DQ600690|Homo	NM_001190417.2	221	-61.36	2	26	3102	3128	24	0.9583	1	||||||||||	||||||||||
2412	uaGGUGGGCGGAGUCGGAGGGUUUCAu	|||||||:|||:||||||||||||	atCCACCCGTCTCGGCCTCCCAAAGTg	>hsa_piR_022437|gb|DQ600690|Homo	NM_001190481.2	217	-58.89	2	26	5974	6000	24	0.9167	1	||||||||||	|||:|||:||
2413	uaGGUGGGCGGAGUCGGAGGGUUUCAu	||| |:||||||||||||||||||	atCCAGCTGCCTCAGCCTCCCAAAGTg	>hsa_piR_022437|gb|DQ600690|Homo	NM_001190481.2	213	-54.2	2	26	4946	4972	24	0.9167	0.9583	||||||||||	|:||||||||
2414	uaGGUGGGCGGAGUCGGAGGGUUUCAu	|::||| |:|::||||||||||||	atCTGCCCACTTTGGCCTCCCAAAGTg	>hsa_piR_022437|gb|DQ600690|Homo	NM_001191033.1	197	-42.96	2	26	142	168	24	0.75	0.9583	||||||||||	|| |:|::||
2415	uaGGUGGGCGGAGUCGGAGGGUUUCAu	|::||||||||:||||||||||||	atCTGCCCGCCTCGGCCTCCCAAAGTg	>hsa_piR_022437|gb|DQ600690|Homo	NM_001193267.2	213	-56.02	2	26	1883	1909	24	0.875	1	||||||||||	|||||||:||
2416	uagguGGGCGG-AGUCGGAGGGUUUCAu	:|:||| |||| ||||||||||	gagtcTCTGCCTTCAG-CTCCCAAAGTg	>hsa_piR_022437|gb|DQ600690|Homo	NM_001193286.1	179	-36.32	2	23	1784	1810	22	0.8182	0.9091	||||||||||	:||| ||||
2417	uaGGUGGGCGGAGUCGGAGGGUUUCAu	|| ||:||:|::||||||||||||	atCCTCCTGCTTTGGCCTCCCAAAGTg	>hsa_piR_022437|gb|DQ600690|Homo	NM_001193288.3	201	-46.77	2	26	9823	9849	24	0.7917	0.9583	||||||||||	|:||:|::||
2418	uaGGUGGGCGGAGUCGGAGGGUUUCAu	|||||| |||::||||||||||||	atCCACCCACCTTGGCCTCCCAAAGTg	>hsa_piR_022437|gb|DQ600690|Homo	NM_001193304.3	209	-51.06	2	26	3466	3492	24	0.875	0.9583	||||||||||	|| |||::||
2419	uaGGUGGGCGGAGUCGGAGGGUUUCAu	|::||:||:||:||||||||||||	atCTGCCTGCTTCGGCCTCCCAAAGTg	>hsa_piR_022437|gb|DQ600690|Homo	NM_001193331.3	205	-50.28	2	26	2858	2884	24	0.7917	1	||||||||||	|:||:||:||
2420	uaGGUGGGCGGAGUCGGAGGGUUUCAu	|::||| |||| ||||||||||||	atCTGCCCACCTCTGCCTCCCAAAGTg	>hsa_piR_022437|gb|DQ600690|Homo	NM_001193451.2	201	-46.49	2	26	5824	5850	24	0.8333	0.9167	||||||||||	|| |||| ||
2421	uaGGUGGGCGGAGUCGGAGGGUUUCAu	|||||| |||:|||||||||||||	atCCACCCACCTTAGCCTCCCAAAGTg	>hsa_piR_022437|gb|DQ600690|Homo	NM_001193513.3	213	-53.52	2	26	2229	2255	24	0.9167	0.9583	||||||||||	|| |||:|||
2422	uaGGUGGGCGGAGUCGGAGGGUUUCAu	|||||| |||:|||||||||||||	atCCACCCACCTTAGCCTCCCAAAGTg	>hsa_piR_022437|gb|DQ600690|Homo	NM_001193514.2	213	-53.52	2	26	2063	2089	24	0.9167	0.9583	||||||||||	|| |||:|||
2423	uaGGUGGGCGGAGUCGGAGGGUUUCAu	|||||| |||:|||||||||||||	atCCACCCACCTTAGCCTCCCAAAGTg	>hsa_piR_022437|gb|DQ600690|Homo	NM_001193515.2	213	-53.52	2	26	2045	2071	24	0.9167	0.9583	||||||||||	|| |||:|||
2424	uaGGUGGGCGGAGUCGGAGGGUUUCAu	||||:| |||||||||||||||||	atCCACTCACCTCAGCCTCCCAAAGTg	>hsa_piR_022437|gb|DQ600690|Homo	NM_001193533.2	213	-52.92	2	26	3700	3726	24	0.9167	0.9583	||||||||||	:| |||||||
2425	uaGGUGGGCGGAGUCGGAGGGUUUCAu	|::||||||||:||||||||||||	atCTGCCCGCCTCGGCCTCCCAAAGTg	>hsa_piR_022437|gb|DQ600690|Homo	NM_001193533.2	213	-56.02	2	26	4098	4124	24	0.875	1	||||||||||	|||||||:||
2426	uaGGUGGGCGGAGUCGGAGGGUUUCAu	||:||| ||||:||||||||||||	acCCGCCCACCTCGGCCTCCCAAAGTg	>hsa_piR_022437|gb|DQ600690|Homo	NM_001193552.2	209	-52.75	2	26	6294	6320	24	0.875	0.9583	||||||||||	|| ||||:||
2427	uaGGUGGGCGGAGUCGGAGGGUUUCAu	|| ||: ||||:||||||||||||	atCCCCCTACCTCGGCCTCCCAAAGTg	>hsa_piR_022437|gb|DQ600690|Homo	NM_001193552.2	201	-48.24	2	26	4261	4287	24	0.8333	0.9167	||||||||||	|: ||||:||
2428	uaGGUGGGCGGAGUCGGAGGGUUUCAu	|:: |:|||||:||||||||||||	atCTGACTGCCTCGGCCTCCCAAAGTg	>hsa_piR_022437|gb|DQ600690|Homo	NM_001193552.2	201	-48.23	2	26	7233	7259	24	0.7917	0.9583	||||||||||	|:|||||:||
2429	uaGGUGGGCGGAGUCGGAGGGUUUCAu	|||||:|||||:||||||||||||	atCCACCTGCCTCGGCCTCCCAAAGTg	>hsa_piR_022437|gb|DQ600690|Homo	NM_001193612.1	217	-58.38	2	26	666	692	24	0.9167	1	||||||||||	|:|||||:||
2430	uaGGUGGGCGGAGUCGGAGGGUUUCAu	||:|||||||::||||||||||||	atCCGCCCGCCTTGGCCTCCCAAAGTg	>hsa_piR_022437|gb|DQ600690|Homo	NM_001193628.2	213	-56.43	2	26	1479	1505	24	0.875	1	||||||||||	||||||::||
2431	uaGGUGGGCGGAGUCGGAGGGUUUCAu	|::|:|||:|||||||||||||||	atCTGCTCGCTTCAGCCTCCCAAAGTg	>hsa_piR_022437|gb|DQ600690|Homo	NM_001194954.1	209	-50.66	2	26	4875	4901	24	0.8333	1	||||||||||	:|||:|||||
2432	uaGGUGGGCGGAGUCGGAGGGUUUCAu	|::|:|||:|||||||||||||||	atCTGCTCGCTTCAGCCTCCCAAAGTg	>hsa_piR_022437|gb|DQ600690|Homo	NM_001194955.1	209	-50.66	2	26	4635	4661	24	0.8333	1	||||||||||	:|||:|||||
2433	uaGGUGGGCGGAGUCGGAGGGUUUCAu	|::|:|||:|||||||||||||||	atCTGCTCGCTTCAGCCTCCCAAAGTg	>hsa_piR_022437|gb|DQ600690|Homo	NM_001194956.1	209	-50.66	2	26	3546	3572	24	0.8333	1	||||||||||	:|||:|||||
2434	uaGGUGGGCGGAGUCGGAGGGUUUCAu	|| ||:|| |::||||||||||||	gtCCCCCTGCGTTGGCCTCCCAAAGTg	>hsa_piR_022437|gb|DQ600690|Homo	NM_001195296.2	197	-43.46	2	26	350	376	24	0.7917	0.9167	||||||||||	|:|| |::||
2435	uaGGUGGGCGGAGUCGGAGGGUUUCAu	|| ||:|| |::||||||||||||	gtCCCCCTGCGTTGGCCTCCCAAAGTg	>hsa_piR_022437|gb|DQ600690|Homo	NM_001195297.1	197	-43.46	2	26	247	273	24	0.7917	0.9167	||||||||||	|:|| |::||
2436	uaGGUGGGCGGAGUCGGAGGGUUUCAu	||:||| ||||:||||||||||||	atCCGCCCACCTCGGCCTCCCAAAGTg	>hsa_piR_022437|gb|DQ600690|Homo	NM_001195304.2	209	-54.87	2	26	1336	1362	24	0.875	0.9583	||||||||||	|| ||||:||
2437	uaGGUGGGCGGAGUCGGAGGGUUUCAu	||:||| ||||:||||||||||||	atCCGCCCACCTCGGCCTCCCAAAGTg	>hsa_piR_022437|gb|DQ600690|Homo	NM_001195305.3	209	-54.87	2	26	1179	1205	24	0.875	0.9583	||||||||||	|| ||||:||
2438	uaGGUGGGCGGAGUCGGAGGGUUUCAu	||:||| ||||:||||||||||||	atCCGCCCACCTCGGCCTCCCAAAGTg	>hsa_piR_022437|gb|DQ600690|Homo	NM_001195306.1	209	-54.87	2	26	1211	1237	24	0.875	0.9583	||||||||||	|| ||||:||
2439	uaGGUGGGCGGAGUCGGAGGGUUUCAu	||:||| ||||:||||||||||||	atCCGCCCACCTCGGCCTCCCAAAGTg	>hsa_piR_022437|gb|DQ600690|Homo	NM_001195307.2	209	-54.87	2	26	1104	1130	24	0.875	0.9583	||||||||||	|| ||||:||
2440	uaGGUGGGCGGAGUCGGAGGGUUUCAu	|::||: |||::||||||||||||	atCTGCCTACCTTGGCCTCCCAAAGTg	>hsa_piR_022437|gb|DQ600690|Homo	NM_001195422.1	197	-42.95	2	26	2372	2398	24	0.75	0.9583	||||||||||	|: |||::||
2441	uaGGUGGGCGGAGUCGGAGGGUUUCAu	|||||||:||||||||||||||||	atCCACCCGTCTCAGCCTCCCAAAGTa	>hsa_piR_022437|gb|DQ600690|Homo	NM_001195483.2	221	-59.64	2	26	2583	2609	24	0.9583	1	||||||||||	|||:||||||
2442	uaGGUGGGCGGAGUCGGAGGGUUUCAu	|::||| ||||:||||||||||||	atCTGCCCACCTCGGCCTCCCAAAGTg	>hsa_piR_022437|gb|DQ600690|Homo	NM_001195553.2	205	-50.18	2	26	6334	6360	24	0.8333	0.9583	||||||||||	|| ||||:||
2443	uaGGUGGGCGGAGUCGGAGGGUUUCAu	|||||| :||||||||||||||||	atCCACCCATCTCAGCCTCCCAAAGTg	>hsa_piR_022437|gb|DQ600690|Homo	NM_001195608.2	213	-53.98	2	26	2990	3016	24	0.9167	0.9583	||||||||||	|| :||||||
2444	uaGGUGGGCGGAGUCGGAGGGUUUCAu	||||||||| ||||||||||||||	atCCACCCGCCCCAGCCTCCCAAAGTg	>hsa_piR_022437|gb|DQ600690|Homo	NM_001195641.2	217	-56.64	2	26	7090	7116	24	0.9583	0.9583	||||||||||	||||| ||||
2445	uaGGUGGGCGGAGUCGGAGGGUUUCAu	||||||||| ::||||||||||||	atCCACCCGCCATGGCCTCCCAAAGTg	>hsa_piR_022437|gb|DQ600690|Homo	NM_001195728.3	209	-53.07	2	26	4124	4150	24	0.875	0.9583	||||||||||	||||| ::||
2446	uaGGUGGGCGGAGUCGGAGGGUUUCAu	|::||| | ||:||||||||||||	atCTGCCCACGTCGGCCTCCCAAAGTg	>hsa_piR_022437|gb|DQ600690|Homo	NM_001195833.2	197	-45.01	2	26	2477	2503	24	0.7917	0.9167	||||||||||	|| | ||:||
2447	uaGGUGGGCGGAGUCGGAGGGUUUCAu	||||||||||||||||||||||||	atCCACCCGCCTCAGCCTCCCAAAGTg	>hsa_piR_022437|gb|DQ600690|Homo	NM_001198536.2	225	-61.83	2	26	2627	2653	24	1	1	||||||||||	||||||||||
2448	uagGUGGGCGGAGUCGGAGGGUUUCAu	||||| |||||||||||||||||	atgCACCCACCTCAGCCTCCCAAAGTg	>hsa_piR_022437|gb|DQ600690|Homo	NM_001198536.2	212	-51.2	2	25	2934	2960	23	0.9565	0.9565	||||||||||	|| |||||||
2449	uaGGUGGGCGGAGUCGGAGGGUUUCAu	||||| |||||:||||||||||||	atCCACCAGCCTCGGCCTCCCAAAGTt	>hsa_piR_022437|gb|DQ600690|Homo	NM_001198595.1	213	-52.21	2	26	4210	4236	24	0.9167	0.9583	||||||||||	| |||||:||
2450	uaGGUGGGCGGAGUCGGAGGGUUUCAu	|||||||||||:|:||||||||||	atCCACCCGCCTCGGTCTCCCAAAGTg	>hsa_piR_022437|gb|DQ600690|Homo	NM_001198644.2	217	-58.89	2	26	1672	1698	24	0.9167	1	||||||||||	|||||||:|:
2451	uaGGUGGGCGGAGUCGGAGGGUUUCAu	|||||||||||:|:||||||||||	atCCACCCGCCTCGGTCTCCCAAAGTg	>hsa_piR_022437|gb|DQ600690|Homo	NM_001198645.2	217	-58.89	2	26	1576	1602	24	0.9167	1	||||||||||	|||||||:|:
2452	uaGGUGGGCGGAGUCGGAGGGUUUCAu	|||||||||||:||||||||||||	acCCACCCGCCTCGGCCTCCCAAAGTg	>hsa_piR_022437|gb|DQ600690|Homo	NM_001198670.2	221	-59.06	2	26	3383	3409	24	0.9583	1	||||||||||	|||||||:||
2453	uaGGUGGGCGGAGUCGGAGGGUUUCAu	|||||||||||:||||||||||||	acCCACCCGCCTCGGCCTCCCAAAGTg	>hsa_piR_022437|gb|DQ600690|Homo	NM_001198671.2	221	-59.06	2	26	3064	3090	24	0.9583	1	||||||||||	|||||||:||
2454	uaGGUGGGCGGAGUCGGAGGGUUUCAu	|||||||||||:||||||||||||	acCCACCCGCCTCGGCCTCCCAAAGTg	>hsa_piR_022437|gb|DQ600690|Homo	NM_001198672.2	221	-59.06	2	26	3053	3079	24	0.9583	1	||||||||||	|||||||:||
2455	uaGGUGGGCGGAGUCGGAGGGUUUCAu	|||||||||||:||||||||||||	acCCACCCGCCTCGGCCTCCCAAAGTg	>hsa_piR_022437|gb|DQ600690|Homo	NM_001198673.2	221	-59.06	2	26	3039	3065	24	0.9583	1	||||||||||	|||||||:||
2456	uaGGUGGGCGGAGUCGGAGGGUUUCAu	|||||||||||:||||||||||||	acCCACCCGCCTCGGCCTCCCAAAGTg	>hsa_piR_022437|gb|DQ600690|Homo	NM_001198674.2	221	-59.06	2	26	2707	2733	24	0.9583	1	||||||||||	|||||||:||
2457	uaGGUGGGCGGAGUCGGAGGGUUUCAu	|||||||||||:||||||||||||	acCCACCCGCCTCGGCCTCCCAAAGTg	>hsa_piR_022437|gb|DQ600690|Homo	NM_001198675.2	221	-59.06	2	26	2864	2890	24	0.9583	1	||||||||||	|||||||:||
2458	uaGGUGGGCGGAGUCGGAGGGUUUCAu	||:|||||||| ||||||||||||	atCCGCCCGCCTCTGCCTCCCAAAGTg	>hsa_piR_022437|gb|DQ600690|Homo	NM_001198681.1	213	-57.02	2	26	4224	4250	24	0.9167	0.9583	||||||||||	||||||| ||
2459	uaGGUGGGCGGAGUCGGAGGGUUUCAu	|||||| |||::|:||||||||||	atCCACCCACCTTGGTCTCCCAAAGTg	>hsa_piR_022437|gb|DQ600690|Homo	NM_001198759.1	205	-48.77	2	26	8126	8152	24	0.8333	0.9583	||||||||||	|| |||::|:
2460	uaGGUGGGCGGAGUCGGAGGGUUUCAu	|||||| |||::|:||||||||||	atCCACCCACCTTGGTCTCCCAAAGTg	>hsa_piR_022437|gb|DQ600690|Homo	NM_001198760.1	205	-48.77	2	26	7958	7984	24	0.8333	0.9583	||||||||||	|| |||::|:
2461	uaGGUGGGCGGAGUCGGAGGGUUUCAu	|||||| |||::|:||||||||||	atCCACCCACCTTGGTCTCCCAAAGTg	>hsa_piR_022437|gb|DQ600690|Homo	NM_001198763.1	205	-48.77	2	26	3012	3038	24	0.8333	0.9583	||||||||||	|| |||::|:
2462	uaGGUGGGCGGAGUCGGAGGGUUUCAu	|||||| |||::|:||||||||||	atCCACCCACCTTGGTCTCCCAAAGTg	>hsa_piR_022437|gb|DQ600690|Homo	NM_001198764.1	205	-48.77	2	26	3075	3101	24	0.8333	0.9583	||||||||||	|| |||::|:
2463	uagguGGGCGGAGUCGGAGGGUUUCAu	||: :||| |:||||||||||	gcaatCCTATCTCTGTCTCCCAAAGTg	>hsa_piR_022437|gb|DQ600690|Homo	NM_001198777.2	182	-35.71	2	23	3749	3775	21	0.7619	0.9048	||||||||||	|: :||| |:
2464	uagguGGGCGGAGUCGGAGGGUUUCAu	||: :||| |:||||||||||	gcaatCCTATCTCTGTCTCCCAAAGTg	>hsa_piR_022437|gb|DQ600690|Homo	NM_001198778.2	182	-35.71	2	23	3656	3682	21	0.7619	0.9048	||||||||||	|: :||| |:
2465	uagguGGGCGGAGUCGGAGGGUUUCAu	||: :||| |:||||||||||	gcaatCCTATCTCTGTCTCCCAAAGTg	>hsa_piR_022437|gb|DQ600690|Homo	NM_001198779.1	182	-35.71	2	23	3816	3842	21	0.7619	0.9048	||||||||||	|: :||| |:
2466	uaGGUGGGCGGAGUCGGAGGGUUUCAu	|::||:||||::||||||||||||	atCTGCCTGCCTTGGCCTCCCAAAGTg	>hsa_piR_022437|gb|DQ600690|Homo	NM_001198783.2	205	-48.94	2	26	7068	7094	24	0.7917	1	||||||||||	|:||||::||
2467	uaGGUGGGCGGAGUCGGAGGGUUUCAu	|::||:||||::||||||||||||	atCTGCCTGCCTTGGCCTCCCAAAGTg	>hsa_piR_022437|gb|DQ600690|Homo	NM_001198786.2	205	-48.94	2	26	6715	6741	24	0.7917	1	||||||||||	|:||||::||
2468	uaGGUGGGCGGAGUCGGAGGGUUUCAu	|::|||||||||||||||||||||	atCTGCCCGCCTCAGCCTCCCAAAGTa	>hsa_piR_022437|gb|DQ600690|Homo	NM_001198915.2	217	-56.77	2	26	4047	4073	24	0.9167	1	||||||||||	||||||||||
2469	uaGGUGGGCGGAGUCGGAGGGUUUCAu	:|:||| ||||:|:||||||||||	aaTCGCCCCCCTCGGTCTCCCAAAGTg	>hsa_piR_022437|gb|DQ600690|Homo	NM_001198915.2	201	-47.89	2	26	5491	5517	24	0.7917	0.9583	||||||||||	|| ||||:|:
2470	uaGGUGGGCGGAGUCGGAGGGUUUCAu	|::|||||||||||||||||||||	atCTGCCCGCCTCAGCCTCCCAAAGTa	>hsa_piR_022437|gb|DQ600690|Homo	NM_001198916.2	217	-56.77	2	26	4259	4285	24	0.9167	1	||||||||||	||||||||||
2471	uaGGUGGGCGGAGUCGGAGGGUUUCAu	:|:||| ||||:|:||||||||||	aaTCGCCCCCCTCGGTCTCCCAAAGTg	>hsa_piR_022437|gb|DQ600690|Homo	NM_001198916.2	201	-47.89	2	26	5703	5729	24	0.7917	0.9583	||||||||||	|| ||||:|:
2472	uaGGUGGGCGGAGUCGGAGGGUUUCAu	|:||||||||::||||||||||||	atCTACCCGCCTTGGCCTCCCAAAGTg	>hsa_piR_022437|gb|DQ600690|Homo	NM_001199058.2	213	-54.19	2	26	2140	2166	24	0.875	1	||||||||||	||||||::||
2473	uaGGUGGGCGGAGUCGGAGGGUUUCAu	|::||| ||||:||||||||||||	atCTGCCCTCCTCGGCCTCCCAAAGTg	>hsa_piR_022437|gb|DQ600690|Homo	NM_001199107.2	205	-49.79	2	26	5539	5565	24	0.8333	0.9583	||||||||||	|| ||||:||
2474	uagGUGGGCGGAGUCGGAGGGUUUCAu	| ||| |||||||||||||||||	ccaCCCCCCCCTCAGCCTCCCAAAGTg	>hsa_piR_022437|gb|DQ600690|Homo	NM_001199107.2	204	-50.15	2	25	4680	4706	23	0.913	0.913	||||||||||	|| |||||||
2475	uaGGUGGGCGGAGUCGGAGGGUUUCAu	||||:|||||||||||||||||||	atCCACTCGCCTCAGCCTCCCAAAGTg	>hsa_piR_022437|gb|DQ600690|Homo	NM_001199155.2	221	-58.76	2	26	6296	6322	24	0.9583	1	||||||||||	:|||||||||
2476	uaGGUGGGCGGAGUCGGAGGGUUUCAu	:||||||||||| |||||||||||	gaTCACCCGCCTCATCCTCCCAAAGTg	>hsa_piR_022437|gb|DQ600690|Homo	NM_001199155.2	213	-51.74	2	26	4825	4851	24	0.9167	0.9583	||||||||||	|||||||| |
2477	uaGGUGGGCGGAGUCGGAGGGUUUCAu	||||:| |||||||||||||||||	atCCACTCACCTCAGCCTCCCAAAGTg	>hsa_piR_022437|gb|DQ600690|Homo	NM_001199155.2	213	-52.92	2	26	6593	6619	24	0.9167	0.9583	||||||||||	:| |||||||
2478	uaGGUGGGCGGAGUCGGAGGGUUUCAu	||:||| |||::||||||||||||	atCCGCCCACCTTGGCCTCCCAAAGTg	>hsa_piR_022437|gb|DQ600690|Homo	NM_001199155.2	205	-50.59	2	26	4515	4541	24	0.8333	0.9583	||||||||||	|| |||::||
2479	uaGGUGGGCGGAGUCGGAGGGUUUCAu	| :||:|||||:||||||||||||	atCAGCCTGCCTCGGCCTCCCAAAGTg	>hsa_piR_022437|gb|DQ600690|Homo	NM_001199155.2	205	-50.85	2	26	8782	8808	24	0.8333	0.9583	||||||||||	|:|||||:||
2480	uaGGUGGGCGGAGUCGGAGGGUUUCAu	||||:|||||||||||||||||||	atCCACTCGCCTCAGCCTCCCAAAGTg	>hsa_piR_022437|gb|DQ600690|Homo	NM_001199156.2	221	-58.76	2	26	5969	5995	24	0.9583	1	||||||||||	:|||||||||
2481	uaGGUGGGCGGAGUCGGAGGGUUUCAu	:||||||||||| |||||||||||	gaTCACCCGCCTCATCCTCCCAAAGTg	>hsa_piR_022437|gb|DQ600690|Homo	NM_001199156.2	213	-51.74	2	26	4498	4524	24	0.9167	0.9583	||||||||||	|||||||| |
2482	uaGGUGGGCGGAGUCGGAGGGUUUCAu	||||:| |||||||||||||||||	atCCACTCACCTCAGCCTCCCAAAGTg	>hsa_piR_022437|gb|DQ600690|Homo	NM_001199156.2	213	-52.92	2	26	6266	6292	24	0.9167	0.9583	||||||||||	:| |||||||
2483	uaGGUGGGCGGAGUCGGAGGGUUUCAu	||:||| |||::||||||||||||	atCCGCCCACCTTGGCCTCCCAAAGTg	>hsa_piR_022437|gb|DQ600690|Homo	NM_001199156.2	205	-50.59	2	26	4188	4214	24	0.8333	0.9583	||||||||||	|| |||::||
2484	uaGGUGGGCGGAGUCGGAGGGUUUCAu	| :||:|||||:||||||||||||	atCAGCCTGCCTCGGCCTCCCAAAGTg	>hsa_piR_022437|gb|DQ600690|Homo	NM_001199156.2	205	-50.85	2	26	8455	8481	24	0.8333	0.9583	||||||||||	|:|||||:||
2485	uaGGUGGGCGGAGUCGGAGGGUUUCAu	||||:|||||||||||||||||||	atCCACTCGCCTCAGCCTCCCAAAGTg	>hsa_piR_022437|gb|DQ600690|Homo	NM_001199157.2	221	-58.76	2	26	6056	6082	24	0.9583	1	||||||||||	:|||||||||
2486	uaGGUGGGCGGAGUCGGAGGGUUUCAu	:||||||||||| |||||||||||	gaTCACCCGCCTCATCCTCCCAAAGTg	>hsa_piR_022437|gb|DQ600690|Homo	NM_001199157.2	213	-51.74	2	26	4585	4611	24	0.9167	0.9583	||||||||||	|||||||| |
2487	uaGGUGGGCGGAGUCGGAGGGUUUCAu	||||:| |||||||||||||||||	atCCACTCACCTCAGCCTCCCAAAGTg	>hsa_piR_022437|gb|DQ600690|Homo	NM_001199157.2	213	-52.92	2	26	6353	6379	24	0.9167	0.9583	||||||||||	:| |||||||
2488	uaGGUGGGCGGAGUCGGAGGGUUUCAu	||:||| |||::||||||||||||	atCCGCCCACCTTGGCCTCCCAAAGTg	>hsa_piR_022437|gb|DQ600690|Homo	NM_001199157.2	205	-50.59	2	26	4275	4301	24	0.8333	0.9583	||||||||||	|| |||::||
2489	uaGGUGGGCGGAGUCGGAGGGUUUCAu	| :||:|||||:||||||||||||	atCAGCCTGCCTCGGCCTCCCAAAGTg	>hsa_piR_022437|gb|DQ600690|Homo	NM_001199157.2	205	-50.85	2	26	8542	8568	24	0.8333	0.9583	||||||||||	|:|||||:||
2490	uaGGUGGGCGGAGUCGGAGGGUUUCAu	||||:|||||||||||||||||||	atCCACTCGCCTCAGCCTCCCAAAGTg	>hsa_piR_022437|gb|DQ600690|Homo	NM_001199158.2	221	-58.76	2	26	5879	5905	24	0.9583	1	||||||||||	:|||||||||
2491	uaGGUGGGCGGAGUCGGAGGGUUUCAu	:||||||||||| |||||||||||	gaTCACCCGCCTCATCCTCCCAAAGTg	>hsa_piR_022437|gb|DQ600690|Homo	NM_001199158.2	213	-51.74	2	26	4408	4434	24	0.9167	0.9583	||||||||||	|||||||| |
2492	uaGGUGGGCGGAGUCGGAGGGUUUCAu	||||:| |||||||||||||||||	atCCACTCACCTCAGCCTCCCAAAGTg	>hsa_piR_022437|gb|DQ600690|Homo	NM_001199158.2	213	-52.92	2	26	6176	6202	24	0.9167	0.9583	||||||||||	:| |||||||
2493	uaGGUGGGCGGAGUCGGAGGGUUUCAu	||:||| |||::||||||||||||	atCCGCCCACCTTGGCCTCCCAAAGTg	>hsa_piR_022437|gb|DQ600690|Homo	NM_001199158.2	205	-50.59	2	26	4098	4124	24	0.8333	0.9583	||||||||||	|| |||::||
2494	uaGGUGGGCGGAGUCGGAGGGUUUCAu	| :||:|||||:||||||||||||	atCAGCCTGCCTCGGCCTCCCAAAGTg	>hsa_piR_022437|gb|DQ600690|Homo	NM_001199158.2	205	-50.85	2	26	8365	8391	24	0.8333	0.9583	||||||||||	|:|||||:||
2495	uaGGUGGGCGGAGUCGGAGGGUUUCAu	|||||||||||:||||||||||||	atCCACCCGCCTCGGCCTCCCAAAGTg	>hsa_piR_022437|gb|DQ600690|Homo	NM_001199208.2	221	-61.18	2	26	3184	3210	24	0.9583	1	||||||||||	|||||||:||
2496	uaGGUGGGCGGAGUCGGAGGGUUUCAu	|||||||||||:||||||||||||	atCCACCCGCCTCGGCCTCCCAAAGTg	>hsa_piR_022437|gb|DQ600690|Homo	NM_001199209.2	221	-61.18	2	26	3168	3194	24	0.9583	1	||||||||||	|||||||:||
2497	uaGGUGGGCGGAGUCGGAGGGUUUCAu	|||||| |||::||||||||||||	atCCACCCACCTTGGCCTCCCAAAGTg	>hsa_piR_022437|gb|DQ600690|Homo	NM_001199219.2	209	-51.06	2	26	1599	1625	24	0.875	0.9583	||||||||||	|| |||::||
2498	uaGGUGGGCGGAGUCGGAGGGUUUCAu	|::||| ||||:||||||||||||	atCTGCCCACCTCGGCCTCCCAAAGTg	>hsa_piR_022437|gb|DQ600690|Homo	NM_001199251.3	205	-50.18	2	26	2377	2403	24	0.8333	0.9583	||||||||||	|| ||||:||
2499	uaGGUGGGCGGAGUCGGAGGGUUUCAu	|::||| ||||:||||||||||||	atCTGCCCACCTCGGCCTCCCAAAGTg	>hsa_piR_022437|gb|DQ600690|Homo	NM_001199253.2	205	-50.18	2	26	1648	1674	24	0.8333	0.9583	||||||||||	|| ||||:||
2500	uaGGUGGGCGGAGUCGGAGGGUUUCAu	|::||| ||||:||||||||||||	atCTGCCCACCTCGGCCTCCCAAAGTg	>hsa_piR_022437|gb|DQ600690|Homo	NM_001199255.2	205	-50.18	2	26	1597	1623	24	0.8333	0.9583	||||||||||	|| ||||:||
2501	uaGGUGGGCGGAGUCGGAGGGUUUCAu	|||||||||||:||||||||||||	atCCACCCGCCTCGGCCTCCCAAAGTg	>hsa_piR_022437|gb|DQ600690|Homo	NM_001199260.2	221	-61.18	2	26	6316	6342	24	0.9583	1	||||||||||	|||||||:||
2502	uaGGUGGGCGGAGUCGGAGGGUUUCAu	||:|||||:|::||||||||||||	atCCGCCCGCTTTGGCCTCCCAAAGTg	>hsa_piR_022437|gb|DQ600690|Homo	NM_001199260.2	209	-53.49	2	26	5472	5498	24	0.8333	1	||||||||||	||||:|::||
2503	uaGGUGGGCGGAGUCGGAGGGUUUCAu	:| ||| |||||||||||||||||	atTCTCCCACCTCAGCCTCCCAAAGTg	>hsa_piR_022437|gb|DQ600690|Homo	NM_001199260.2	205	-48.77	2	26	166	192	24	0.875	0.9167	||||||||||	|| |||||||
2504	uaGGUGGGCGGAGUCGGAGGGUUUCAu	||||::|||||:|:||||||||||	atCCACTTGCCTCGGTCTCCCAAAGTg	>hsa_piR_022437|gb|DQ600690|Homo	NM_001199319.2	209	-53.36	2	26	10337	10363	24	0.8333	1	||||||||||	::|||||:|:
2505	uaGGUGGGCGGAGUCGGAGGGUUUCAu	|::||| |||||||||||||||||	atCTGCCCTCCTCAGCCTCCCAAAGTg	>hsa_piR_022437|gb|DQ600690|Homo	NM_001199319.2	209	-50.44	2	26	13149	13175	24	0.875	0.9583	||||||||||	|| |||||||
2506	uaGGUGGGCGGAGUCGGAGGGUUUCAu	|||||| ||| :||||||||||||	atCCACCCACCTAGGCCTCCCAAAGTg	>hsa_piR_022437|gb|DQ600690|Homo	NM_001199319.2	205	-49.03	2	26	2776	2802	24	0.875	0.9167	||||||||||	|| ||| :||
2507	uaGGUGGGCGGAGUCGGAGGGUUUCAu	|::||| ||||:||||||||||||	atCTGCCCACCTCGGCCTCCCAAAGTg	>hsa_piR_022437|gb|DQ600690|Homo	NM_001199319.2	205	-50.18	2	26	9492	9518	24	0.8333	0.9583	||||||||||	|| ||||:||
2508	uaGGUGGGCGGAGUCGGAGGGUUUCAu	|::| :|||||| |||||||||||	atCTGCATGCCTCA-CCTCCCAAAGTg	>hsa_piR_022437|gb|DQ600690|Homo	NM_001199319.2	191	-41.47	2	26	8897	8922	24	0.7917	0.9167	||||||||||	:|||||| |
2509	uaGGUGGGCGGAGUCGGAGGGUUUCAu	|| ||| :||:: |||||||||||	atCCTCCCATCTTGACCTCCCAAAGTg	>hsa_piR_022437|gb|DQ600690|Homo	NM_001199319.2	189	-40.64	2	26	10615	10641	24	0.75	0.875	||||||||||	|| :||:: |
2510	uaGGUGGGCGGAGUCGGAGGGUUUCAu	|| |::||||||||||||||||||	atCCTCTTGCCTCAGCCTCCCAAAGTg	>hsa_piR_022437|gb|DQ600690|Homo	NM_001199346.2	209	-51.91	2	26	2524	2550	24	0.875	0.9583	||||||||||	::||||||||
2511	uaGGUGGGCGGAGUCGGAGGGUUUCAu	|::||:||||::||||||||||||	atCTGCCTGCCTTGGCCTCCCAAAGTg	>hsa_piR_022437|gb|DQ600690|Homo	NM_001199346.2	205	-48.94	2	26	5069	5095	24	0.7917	1	||||||||||	|:||||::||
2512	uagguGGGCGGAGU-CGGAGGGUUUCAu	||: || |: ||||||||||||	tttgtCCTTCCCCGTGCCTCCCAAAGTt	>hsa_piR_022437|gb|DQ600690|Homo	NM_001199434.1	177	-37.26	2	23	1978	2005	22	0.7727	0.8636	||||||||||	: || |: ||
2513	uaGGUGGGCGGAGUCGGAGGGUUUCAu	|||||| || ||||||||||||||	atCCACCCACCCCAGCCTCCCAAAGTg	>hsa_piR_022437|gb|DQ600690|Homo	NM_001199739.2	209	-50.8	2	26	2808	2834	24	0.9167	0.9167	||||||||||	|| || ||||
2514	uaGGUGGGCGGAGUCGGAGGGUUUCAu	|::||| |||:: |||||||||||	atCTGCCCACCTTGACCTCCCAAAGTg	>hsa_piR_022437|gb|DQ600690|Homo	NM_001199849.1	193	-41.88	2	26	139	165	24	0.75	0.9167	||||||||||	|| |||:: |
2515	uaGGU-GGGCGGAGUC-GGAGGGUUUCAu	||| || |||| :| |||||||||||	gcCCAGCCAGCCTGGGACCTCCCAAAGTg	>hsa_piR_022437|gb|DQ600690|Homo	NM_001199865.2	187	-42.2	2	26	4307	4335	26	0.8077	0.8462	||||||||||	|||| :| |
2516	uaGGUGGGCGGAGUCGGAGGGUUUCAu	:| ||:||||||||||||||||||	ggTCTCCTGCCTCAGCCTCCCAAAGTg	>hsa_piR_022437|gb|DQ600690|Homo	NM_001199868.1	209	-51.68	2	26	1252	1278	24	0.875	0.9583	||||||||||	|:||||||||
2517	uaGGUGGGCGGAGUCGGAGGGUUUCAu	|||||| |||::|:||||||||||	atCCACCCACCTTGGTCTCCCAAAGTg	>hsa_piR_022437|gb|DQ600690|Homo	NM_001199957.2	205	-48.77	2	26	3166	3192	24	0.8333	0.9583	||||||||||	|| |||::|:
2518	uaGGUGGGCGGAGUCGGAGGGUUUCAu	:|||||||||||||||||||||||	atTCACCCGCCTCAGCCTCCCAAAGTg	>hsa_piR_022437|gb|DQ600690|Homo	NM_001199981.2	221	-59	2	26	7639	7665	24	0.9583	1	||||||||||	||||||||||
2519	uaGGUGGGCGGAGUCGGAGGGUUUCAu	|||||:||||||||||||||||||	atCCACCTGCCTCAGCCTCCCAAAGTg	>hsa_piR_022437|gb|DQ600690|Homo	NM_001199981.2	221	-59.03	2	26	7965	7991	24	0.9583	1	||||||||||	|:||||||||
2520	uaGGUGGGCGGAGUCGGAGGGUUUCAu	|:|||:||||::||||||||||||	atCTACCTGCCTTGGCCTCCCAAAGTg	>hsa_piR_022437|gb|DQ600690|Homo	NM_001199981.2	209	-51.39	2	26	3962	3988	24	0.8333	1	||||||||||	|:||||::||
2521	uaGGUGGGCGGAGUCGGAGGGUUUCAu	|::||| ||||:||||||||||||	atCTGCCCACCTCGGCCTCCCAAAGTg	>hsa_piR_022437|gb|DQ600690|Homo	NM_001199981.2	205	-50.18	2	26	9569	9595	24	0.8333	0.9583	||||||||||	|| ||||:||
2522	uaGGUGGGCGGAGUCGGAGGGUUUCAu	|| ||| |||:: |||||||||||	ctCCTCCCACCTTGACCTCCCAAAGTt	>hsa_piR_022437|gb|DQ600690|Homo	NM_001199981.2	193	-40.03	2	26	9705	9731	24	0.7917	0.875	||||||||||	|| |||:: |
2523	uaGGUGGGCGGAGUCGGAGGGUUUCAu	:|||||||||||||||||||||||	atTCACCCGCCTCAGCCTCCCAAAGTg	>hsa_piR_022437|gb|DQ600690|Homo	NM_001199982.2	221	-59	2	26	7470	7496	24	0.9583	1	||||||||||	||||||||||
2524	uaGGUGGGCGGAGUCGGAGGGUUUCAu	|||||:||||||||||||||||||	atCCACCTGCCTCAGCCTCCCAAAGTg	>hsa_piR_022437|gb|DQ600690|Homo	NM_001199982.2	221	-59.03	2	26	7796	7822	24	0.9583	1	||||||||||	|:||||||||
2525	uaGGUGGGCGGAGUCGGAGGGUUUCAu	|:|||:||||::||||||||||||	atCTACCTGCCTTGGCCTCCCAAAGTg	>hsa_piR_022437|gb|DQ600690|Homo	NM_001199982.2	209	-51.39	2	26	3793	3819	24	0.8333	1	||||||||||	|:||||::||
2526	uaGGUGGGCGGAGUCGGAGGGUUUCAu	|::||| ||||:||||||||||||	atCTGCCCACCTCGGCCTCCCAAAGTg	>hsa_piR_022437|gb|DQ600690|Homo	NM_001199982.2	205	-50.18	2	26	9400	9426	24	0.8333	0.9583	||||||||||	|| ||||:||
2527	uaGGUGGGCGGAGUCGGAGGGUUUCAu	|| ||| |||:: |||||||||||	ctCCTCCCACCTTGACCTCCCAAAGTt	>hsa_piR_022437|gb|DQ600690|Homo	NM_001199982.2	193	-40.03	2	26	9536	9562	24	0.7917	0.875	||||||||||	|| |||:: |
2528	uaGGUGGGCGGAGUCGGAGGGUUUCAu	:|||||||||||||||||||||||	atTCACCCGCCTCAGCCTCCCAAAGTg	>hsa_piR_022437|gb|DQ600690|Homo	NM_001199983.2	221	-59	2	26	7655	7681	24	0.9583	1	||||||||||	||||||||||
2529	uaGGUGGGCGGAGUCGGAGGGUUUCAu	|||||:||||||||||||||||||	atCCACCTGCCTCAGCCTCCCAAAGTg	>hsa_piR_022437|gb|DQ600690|Homo	NM_001199983.2	221	-59.03	2	26	7981	8007	24	0.9583	1	||||||||||	|:||||||||
2530	uaGGUGGGCGGAGUCGGAGGGUUUCAu	|:|||:||||::||||||||||||	atCTACCTGCCTTGGCCTCCCAAAGTg	>hsa_piR_022437|gb|DQ600690|Homo	NM_001199983.2	209	-51.39	2	26	3978	4004	24	0.8333	1	||||||||||	|:||||::||
2531	uaGGUGGGCGGAGUCGGAGGGUUUCAu	|::||| ||||:||||||||||||	atCTGCCCACCTCGGCCTCCCAAAGTg	>hsa_piR_022437|gb|DQ600690|Homo	NM_001199983.2	205	-50.18	2	26	9585	9611	24	0.8333	0.9583	||||||||||	|| ||||:||
2532	uaGGUGGGCGGAGUCGGAGGGUUUCAu	|| ||| |||:: |||||||||||	ctCCTCCCACCTTGACCTCCCAAAGTt	>hsa_piR_022437|gb|DQ600690|Homo	NM_001199983.2	193	-40.03	2	26	9721	9747	24	0.7917	0.875	||||||||||	|| |||:: |
2533	uaGGUGGGCGGAGUCGGAGGGUUUCAu	|:|||| |||:: |||||||||||	gtCTACCCACCTTGACCTCCCAAAGTg	>hsa_piR_022437|gb|DQ600690|Homo	NM_001201334.2	197	-44.02	2	26	3582	3608	24	0.7917	0.9167	||||||||||	|| |||:: |
2534	uaGGUGGGCGGAGUCGGAGGGUUUCAu	||:||:||||||||||||||||||	atCCGCCTGCCTCAGCCTCCCAAAGTg	>hsa_piR_022437|gb|DQ600690|Homo	NM_001201366.2	217	-58.56	2	26	4274	4300	24	0.9167	1	||||||||||	|:||||||||
2535	uaGGUGGGCGGAGUCGGAGGGUUUCAu	|::||| | ||:||||||||||||	acCTGCCCACATCGGCCTCCCAAAGTg	>hsa_piR_022437|gb|DQ600690|Homo	NM_001201366.2	197	-42.82	2	26	3414	3440	24	0.7917	0.9167	||||||||||	|| | ||:||
2536	uaGGUGGGCGGAGUCGGAGGGUUUCAu	:|:||| |||||||||||||||||	atTCGCCCACCTCAGCCTCCCAAAGTg	>hsa_piR_022437|gb|DQ600690|Homo	NM_001201370.1	209	-52.69	2	26	1366	1392	24	0.875	0.9583	||||||||||	|| |||||||
2537	uaGGUGGGCGGAGUCGGAGGGUUUCAu	|||||||||||:||||||||||||	atCCACCCGCCTCGGCCTCCCAAAGTg	>hsa_piR_022437|gb|DQ600690|Homo	NM_001201477.2	221	-61.18	2	26	5737	5763	24	0.9583	1	||||||||||	|||||||:||
2538	uaGGUGGGCGGAGUCGGAGGGUUUCAu	||:||||||||:||||||||||||	atCCGCCCGCCTCGGCCTCCCAAAGTg	>hsa_piR_022437|gb|DQ600690|Homo	NM_001201477.2	217	-60.71	2	26	6051	6077	24	0.9167	1	||||||||||	|||||||:||
2539	uaGGUGGGCGGAGUCGGAGGGUUUCAu	||:|| |||||:||||||||||||	atCCGCCGGCCTCGGCCTCCCAAAGTg	>hsa_piR_022437|gb|DQ600690|Homo	NM_001201539.2	209	-55.59	2	26	60	86	24	0.875	0.9583	||||||||||	| |||||:||
2540	uaGGUGGGCGGAGUCGGAGGGUUUCAu	|||||:||||||||||||||||||	atCCACCTGCCTCAGCCTCCCAAAGTg	>hsa_piR_022437|gb|DQ600690|Homo	NM_001201575.1	221	-59.03	2	26	1814	1840	24	0.9583	1	||||||||||	|:||||||||
2541	uaGGUGGGCGGAGUCGGAGGGUUUCAu	|::||||||||:||||||||||||	atCTGCCCGCCTCGGCCTCCCAAAGTg	>hsa_piR_022437|gb|DQ600690|Homo	NM_001202403.1	213	-56.02	2	26	2976	3002	24	0.875	1	||||||||||	|||||||:||
2542	uaGGUGGGCGGAGUCGGAGGGUUUCAu	|||||| |||||||||||||||||	atCCACCCACCTCAGCCTCCCAAAGTg	>hsa_piR_022437|gb|DQ600690|Homo	NM_001202473.1	217	-55.99	2	26	2310	2336	24	0.9583	0.9583	||||||||||	|| |||||||
2543	uaGGUGGGCGGAGUCGGAGGGUUUCAu	:|||| |||||:||||||||||||	atTCACCAGCCTCGGCCTCCCAAAGTg	>hsa_piR_022437|gb|DQ600690|Homo	NM_001202515.1	209	-50.79	2	26	2540	2566	24	0.875	0.9583	||||||||||	| |||||:||
2544	uaGGUGGGCGGAGUCGGAGGGUUUCAu	:|||| |||||:||||||||||||	atTCACCAGCCTCGGCCTCCCAAAGTg	>hsa_piR_022437|gb|DQ600690|Homo	NM_001202516.3	209	-50.79	2	26	3331	3357	24	0.875	0.9583	||||||||||	| |||||:||
2545	uaGGUGGGCGGAGUCGGAGGGUUUCAu	||:||:||||::||||||||||||	atCCGCCTGCCTTGGCCTCCCAAAGTg	>hsa_piR_022437|gb|DQ600690|Homo	NM_001202516.3	209	-53.63	2	26	11266	11292	24	0.8333	1	||||||||||	|:||||::||
2546	uaGGUGGGCGGAGUCGGAGGGUUUCAu	|| ||| |||| |||||||||||	atCCTCCCACCTCCACCTCCCAAAGTg	>hsa_piR_022437|gb|DQ600690|Homo	NM_001202516.3	193	-43.84	2	26	12442	12468	24	0.8333	0.8333	||||||||||	|| |||| |
2547	uaGGUGGGCGGAGUCGGAGGGUUUCAu	:|||| |||||:||||||||||||	atTCACCAGCCTCGGCCTCCCAAAGTg	>hsa_piR_022437|gb|DQ600690|Homo	NM_001202517.3	209	-50.79	2	26	3018	3044	24	0.875	0.9583	||||||||||	| |||||:||
2548	uaGGUGGGCGGAGUCGGAGGGUUUCAu	||:||:||||::||||||||||||	atCCGCCTGCCTTGGCCTCCCAAAGTg	>hsa_piR_022437|gb|DQ600690|Homo	NM_001202517.3	209	-53.63	2	26	10953	10979	24	0.8333	1	||||||||||	|:||||::||
2549	uaGGUGGGCGGAGUCGGAGGGUUUCAu	|| ||| |||| |||||||||||	atCCTCCCACCTCCACCTCCCAAAGTg	>hsa_piR_022437|gb|DQ600690|Homo	NM_001202517.3	193	-43.84	2	26	12129	12155	24	0.8333	0.8333	||||||||||	|| |||| |
2550	uaGGUGGGCGGAGUCGGAGGGUUUCAu	:|||| |||||:||||||||||||	atTCACCAGCCTCGGCCTCCCAAAGTg	>hsa_piR_022437|gb|DQ600690|Homo	NM_001202518.2	209	-50.79	2	26	3787	3813	24	0.875	0.9583	||||||||||	| |||||:||
2551	uaGGUGGGCGGAGUCGGAGGGUUUCAu	:|||| |||||:||||||||||||	atTCACCAGCCTCGGCCTCCCAAAGTg	>hsa_piR_022437|gb|DQ600690|Homo	NM_001202519.3	209	-50.79	2	26	3857	3883	24	0.875	0.9583	||||||||||	| |||||:||
2552	uaGGUGGGCGGAGUCGGAGGGUUUCAu	|| ||||||||:||||||||||||	atCCTCCCGCCTCGGCCTCCCAAAGTg	>hsa_piR_022437|gb|DQ600690|Homo	NM_001204082.1	213	-56.79	2	26	2171	2197	24	0.9167	0.9583	||||||||||	|||||||:||
2553	uaGGUGGGCGGAGUCGGAGGGUUUCAu	|| ||||||||:||||||||||||	atCCTCCCGCCTCGGCCTCCCAAAGTg	>hsa_piR_022437|gb|DQ600690|Homo	NM_001204083.2	213	-56.79	2	26	2458	2484	24	0.9167	0.9583	||||||||||	|||||||:||
2554	uaGGUGGGCGGAGUCGGAGGGUUUCAu	|||||:|||| :||||||||||||	atCCACCTGCCTGGGCCTCCCAAAGTg	>hsa_piR_022437|gb|DQ600690|Homo	NM_001204087.1	209	-53.77	2	26	9950	9976	24	0.875	0.9583	||||||||||	|:|||| :||
2555	uaGGUGGGCGGAGUCGGAGGGUUUCAu	|| :|||: ::||||||||||||	atCCTTCCGTGATGGCCTCCCAAAGTg	>hsa_piR_022437|gb|DQ600690|Homo	NM_001204118.2	185	-39.36	2	26	1919	1945	24	0.7083	0.875	||||||||||	|||: ::||
2556	uaGGUGGGCGGAGUCGGAGGGUUUCAu	:| |||||||||||||||||||||	atTCCCCCGCCTCAGCCTCCCAAAGTg	>hsa_piR_022437|gb|DQ600690|Homo	NM_001204171.1	213	-55.78	2	26	2580	2606	24	0.9167	0.9583	||||||||||	||||||||||
2557	uaGGUGGGCGGAGUCGGAGGGUUUCAu	|::||| |||||||||||||||||	atCTGCCCACCTCAGCCTCCCAAAGTa	>hsa_piR_022437|gb|DQ600690|Homo	NM_001204171.1	209	-50.93	2	26	7199	7225	24	0.875	0.9583	||||||||||	|| |||||||
2558	uaGGUGGGCGGAGUCGGAGGGUUUCAu	|::|||||||::||||||||||||	atCTGCCCGCCTTGGCCTCCCAAAGTa	>hsa_piR_022437|gb|DQ600690|Homo	NM_001204171.1	209	-51.84	2	26	9448	9474	24	0.8333	1	||||||||||	||||||::||
2559	uaGGUGGGCGGAGUCGGAGGGUUUCAu	|||| | ||||:||||||||||||	atCCACACACCTCGGCCTCCCAAAGTc	>hsa_piR_022437|gb|DQ600690|Homo	NM_001204171.1	205	-45.72	2	26	4368	4394	24	0.875	0.9167	||||||||||	| ||||:||
2560	uaGGUGGGCGGAGUCGGAGGGUUUCAu	:| |||||||||||||||||||||	atTCCCCCGCCTCAGCCTCCCAAAGTg	>hsa_piR_022437|gb|DQ600690|Homo	NM_001204172.1	213	-55.78	2	26	1752	1778	24	0.9167	0.9583	||||||||||	||||||||||
2561	uaGGUGGGCGGAGUCGGAGGGUUUCAu	|::||| |||||||||||||||||	atCTGCCCACCTCAGCCTCCCAAAGTa	>hsa_piR_022437|gb|DQ600690|Homo	NM_001204172.1	209	-50.93	2	26	6371	6397	24	0.875	0.9583	||||||||||	|| |||||||
2562	uaGGUGGGCGGAGUCGGAGGGUUUCAu	|::|||||||::||||||||||||	atCTGCCCGCCTTGGCCTCCCAAAGTa	>hsa_piR_022437|gb|DQ600690|Homo	NM_001204172.1	209	-51.84	2	26	8620	8646	24	0.8333	1	||||||||||	||||||::||
2563	uaGGUGGGCGGAGUCGGAGGGUUUCAu	|||| | ||||:||||||||||||	atCCACACACCTCGGCCTCCCAAAGTc	>hsa_piR_022437|gb|DQ600690|Homo	NM_001204172.1	205	-45.72	2	26	3540	3566	24	0.875	0.9167	||||||||||	| ||||:||
2564	uaGGUGGGCGGAGUCGGAGGGUUUCAu	|||| | |||||||||||||||||	atCCACGCACCTCAGCCTCCCAAAGTg	>hsa_piR_022437|gb|DQ600690|Homo	NM_001204213.1	209	-50.61	2	26	7074	7100	24	0.9167	0.9167	||||||||||	| |||||||
2565	uaGGUGGGCGGAGUCGGAGGGUUUCAu	|||| | |||||||||||||||||	atCCACGCACCTCAGCCTCCCAAAGTg	>hsa_piR_022437|gb|DQ600690|Homo	NM_001204214.1	209	-50.61	2	26	7069	7095	24	0.9167	0.9167	||||||||||	| |||||||
2566	uaGGUGGGCGGAGUCGGAGGGUUUCAu	|||| | |||||||||||||||||	atCCACGCACCTCAGCCTCCCAAAGTg	>hsa_piR_022437|gb|DQ600690|Homo	NM_001204218.1	209	-50.61	2	26	8584	8610	24	0.9167	0.9167	||||||||||	| |||||||
2567	uaGGUGGGCGGAGUCGGAGGGUUUCAu	|::||| |||||||||||||||||	atCTGCCCACCTCAGCCTCCCAAAGTg	>hsa_piR_022437|gb|DQ600690|Homo	NM_001204255.2	209	-50.83	2	26	3500	3526	24	0.875	0.9583	||||||||||	|| |||||||
2568	uaGGUGGGCGGAGUCGGAGGGUUUCAu	||||:|||||:: |||||||||||	atCCACTCGCCTTGCCCTCCCAAAGTg	>hsa_piR_022437|gb|DQ600690|Homo	NM_001204401.2	205	-48.93	2	26	3707	3733	24	0.8333	0.9583	||||||||||	:|||||:: |
2569	uaGGUGGGCGGAGUCGGAGGGUUUCAu	:|| :| :||| :||||||||||	ccTCAAGTGATTCA-TCTCCCAAAGTg	>hsa_piR_022437|gb|DQ600690|Homo	NM_001204401.2	171	-29.06	2	26	7323	7348	24	0.6667	0.8333	||||||||||	:| :||| :
2570	uaGGUGGGCGGAGUCGGAGGGUUUCAu	|||||:||||| ||||||||||||	gtCCACCTGCCTCCGCCTCCCAAAGTg	>hsa_piR_022437|gb|DQ600690|Homo	NM_001204414.1	213	-53.31	2	26	2015	2041	24	0.9167	0.9583	||||||||||	|:||||| ||
2571	uaGGUGGGCGGAGUCGGAGGGUUUCAu	|||||:||||| ||||||||||||	gtCCACCTGCCTCCGCCTCCCAAAGTg	>hsa_piR_022437|gb|DQ600690|Homo	NM_001204415.1	213	-53.31	2	26	1716	1742	24	0.9167	0.9583	||||||||||	|:||||| ||
2572	uaGGUGGGCGGAGUCGGAGGGUUUCAu	|||||| : |::||||||||||||	atCCACCCATATTGGCCTCCCAAAGTg	>hsa_piR_022437|gb|DQ600690|Homo	NM_001204447.2	197	-43.33	2	26	4479	4505	24	0.7917	0.9167	||||||||||	|| : |::||
2573	uaGGUGGGCGGAGUCGGAGGGUUUCAu	|||||:|||||:||||||||||||	atCCACCTGCCTCGGCCTCCCAAAGTg	>hsa_piR_022437|gb|DQ600690|Homo	NM_001204817.2	217	-58.38	2	26	3778	3804	24	0.9167	1	||||||||||	|:|||||:||
2574	uaGGUGGGCGGAGUCGGAGGGUUUCAu	||:|||||||:|||||||||||||	atCCGCCCGCCTTAGCCTCCCAAAGTg	>hsa_piR_022437|gb|DQ600690|Homo	NM_001204817.2	217	-58.89	2	26	5253	5279	24	0.9167	1	||||||||||	||||||:|||
2575	uaGGUGGGCGGAGUCGGAGGGUUUCAu	|||||| ||||:||||||||||||	atCCACCCACCTCGGCCTCCCAAAGTg	>hsa_piR_022437|gb|DQ600690|Homo	NM_001204817.2	213	-55.34	2	26	5120	5146	24	0.9167	0.9583	||||||||||	|| ||||:||
2576	uaGGUGGGCGGAGUCGGAGGGUUUCAu	|||||| |||: | ||||||||||	atCCACCCACCTT-GACTCCCAAAGTg	>hsa_piR_022437|gb|DQ600690|Homo	NM_001204817.2	191	-41.86	2	26	2273	2298	24	0.8333	0.875	||||||||||	|| |||: |
2577	uaGGUGGGCGGAGUCGGAGGGUUUCAu	:|:||| |:|::||||||||||||	gaTCGCCCTCTTTGGCCTCCCAAAGTg	>hsa_piR_022437|gb|DQ600690|Homo	NM_001204835.2	197	-43.44	2	26	3228	3254	24	0.75	0.9583	||||||||||	|| |:|::||
2578	uaGGUGGGCGGAGUCGGAGGGUUUCAu	:|:||| |:|::||||||||||||	gaTCGCCCTCTTTGGCCTCCCAAAGTg	>hsa_piR_022437|gb|DQ600690|Homo	NM_001204836.2	197	-43.44	2	26	2970	2996	24	0.75	0.9583	||||||||||	|| |:|::||
2579	uaGGUGGGCGGAGUCGGAGGGUUUCAu	:|:||| |:|::||||||||||||	gaTCGCCCTCTTTGGCCTCCCAAAGTg	>hsa_piR_022437|gb|DQ600690|Homo	NM_001204837.2	197	-43.44	2	26	2911	2937	24	0.75	0.9583	||||||||||	|| |:|::||
2580	uaGGUGGGCGGAGUCGGAGGGUUUCAu	||:||| ||||:||||||||||||	atCCGCCCACCTCGGCCTCCCAAAGTg	>hsa_piR_022437|gb|DQ600690|Homo	NM_001204848.2	209	-54.87	2	26	1114	1140	24	0.875	0.9583	||||||||||	|| ||||:||
2581	uaGGUGGGCGGAGUCGGAGGGUUUCAu	||:||| ||||:||||||||||||	atCCGCCCACCTCGGCCTCCCAAAGTg	>hsa_piR_022437|gb|DQ600690|Homo	NM_001204856.2	209	-54.87	2	26	1149	1175	24	0.875	0.9583	||||||||||	|| ||||:||
2582	uaGGUGGGCGGAGUCGGAGGGUUUCAu	|::||| |||||||||||||||||	atCTGCCCACCTCAGCCTCCCAAAGTg	>hsa_piR_022437|gb|DQ600690|Homo	NM_001205138.4	209	-50.83	2	26	1574	1600	24	0.875	0.9583	||||||||||	|| |||||||
2583	uaGGUGGGCGGAGUCGGAGGGUUUCAu	||::|:||:|::||||||||||||	atCCGTCTGCTTTGGCCTCCCAAAGTg	>hsa_piR_022437|gb|DQ600690|Homo	NM_001205138.4	201	-47.92	2	26	1439	1465	24	0.75	1	||||||||||	|:||:|::||
2584	uaGGUGGGCGGAGUCGGAGGGUUUCAu	|::||:|||||:||||||||||||	gtCTGCCTGCCTCGGCCTCCCAAAGTg	>hsa_piR_022437|gb|DQ600690|Homo	NM_001205254.2	209	-52.91	2	26	3250	3276	24	0.8333	1	||||||||||	|:|||||:||
2585	uaGGUGGGCGGAGUCGGAGGGUUUCAu	|||:|| ||||:||||||||||||	atCCATCCACCTCGGCCTCCCAAAGTg	>hsa_piR_022437|gb|DQ600690|Homo	NM_001205254.2	209	-52.99	2	26	3585	3611	24	0.875	0.9583	||||||||||	|| ||||:||
2586	uaGGUGGGCGGAGUCGGAGGGUUUCAu	|::||:|||||:||||||||||||	gtCTGCCTGCCTCGGCCTCCCAAAGTg	>hsa_piR_022437|gb|DQ600690|Homo	NM_001205255.1	209	-52.91	2	26	2460	2486	24	0.8333	1	||||||||||	|:|||||:||
2587	uaGGUGGGCGGAGUCGGAGGGUUUCAu	|||:|| ||||:||||||||||||	atCCATCCACCTCGGCCTCCCAAAGTg	>hsa_piR_022437|gb|DQ600690|Homo	NM_001205255.1	209	-52.99	2	26	2795	2821	24	0.875	0.9583	||||||||||	|| ||||:||
2588	uaGGUGGGCGGAGUCGGAGGGUUUCAu	|::||||||||:||||||||||||	atCTGCCCGCCTCGGCCTCCCAAAGTg	>hsa_piR_022437|gb|DQ600690|Homo	NM_001205262.3	213	-56.02	2	26	3000	3026	24	0.875	1	||||||||||	|||||||:||
2589	uaGGUGGGCGGAGUCGGAGGGUUUCAu	|||||||||||:||||||||||||	atCCACCCGCCTCGGCCTCCCAAAGTg	>hsa_piR_022437|gb|DQ600690|Homo	NM_001205319.1	221	-61.18	2	26	2100	2126	24	0.9583	1	||||||||||	|||||||:||
2590	uaGGUGGGCGGAGUCGGAGGGUUUCAu	||:||||||||:||||||||||||	atCCGCCCGCCTCGGCCTCCCAAAGTg	>hsa_piR_022437|gb|DQ600690|Homo	NM_001206491.1	217	-60.71	2	26	4885	4911	24	0.9167	1	||||||||||	|||||||:||
2591	uagguGGGCGGAGUCGGAGGGUUUCAu	|::||||:|||||||||||||	gagatCTTGCCTTAGCCTCCCAAAGTg	>hsa_piR_022437|gb|DQ600690|Homo	NM_001206491.1	198	-43.75	2	23	5004	5030	21	0.8571	1	||||||||||	::||||:|||
2592	uaGGUGGGCGGAGUCGGAGGGUUUCAu	|||||| |||::||||||||||||	atCCACCCACCTTGGCCTCCCAAAGTg	>hsa_piR_022437|gb|DQ600690|Homo	NM_001206646.2	209	-51.06	2	26	989	1015	24	0.875	0.9583	||||||||||	|| |||::||
2593	uaGGUGGGCGGAGUCGGAGGGUUUCAu	|||||| |||::||||||||||||	atCCACCCACCTTGGCCTCCCAAAGTg	>hsa_piR_022437|gb|DQ600690|Homo	NM_001206647.2	209	-51.06	2	26	989	1015	24	0.875	0.9583	||||||||||	|| |||::||
2594	uaGGUGGGCGGAGUCGGAGGGUUUCAu	|||||| |||::||||||||||||	atCCACCCACCTTGGCCTCCCAAAGTg	>hsa_piR_022437|gb|DQ600690|Homo	NM_001206648.2	209	-51.06	2	26	908	934	24	0.875	0.9583	||||||||||	|| |||::||
2595	uaGGUGGGCGGAGUCGGAGGGUUUCAu	|||||:|||||:||||||||||||	atCCACCTGCCTCGGCCTCCCAAAGTg	>hsa_piR_022437|gb|DQ600690|Homo	NM_001206670.1	217	-58.38	2	26	3296	3322	24	0.9167	1	||||||||||	|:|||||:||
2596	uagGUGGGCGGAGUCGGAGGGUUUCAu	||||| ||||:||||||||||||	ataCACCCACCTCGGCCTCCCAAAGTg	>hsa_piR_022437|gb|DQ600690|Homo	NM_001206836.2	208	-50.56	2	25	3107	3133	23	0.913	0.9565	||||||||||	|| ||||:||
2597	uaGGUGGGCGGAGUCGGAGGGUUUCAu	||||| ||||||| ||||||||||	atCCACCAGCCTCAGACTCCCAAAGTg	>hsa_piR_022437|gb|DQ600690|Homo	NM_001206866.2	209	-47.78	2	26	1453	1479	24	0.9167	0.9167	||||||||||	| |||||||
2598	uaGGUGGGCGGAGUCGGAGGGUUUCAu	||:||||||||:||||||||||||	atCCGCCCGCCTCGGCCTCCCAAAGTg	>hsa_piR_022437|gb|DQ600690|Homo	NM_001206955.1	217	-60.71	2	26	136	162	24	0.9167	1	||||||||||	|||||||:||
2599	uaGGUGGGCGGAGUCGGAGGGUUUCAu	|||||| ||||| |||||||||||	atCCACCCACCTCAACCTCCCAAAGTg	>hsa_piR_022437|gb|DQ600690|Homo	NM_001206971.3	209	-49.72	2	26	9212	9238	24	0.9167	0.9167	||||||||||	|| ||||| |
2600	uaGGUGGGCGGAGUCGGAGGGUUUCAu	|||||| ||||| |||||||||||	atCCACCCACCTCAACCTCCCAAAGTg	>hsa_piR_022437|gb|DQ600690|Homo	NM_001206972.3	209	-49.72	2	26	9212	9238	24	0.9167	0.9167	||||||||||	|| ||||| |
2601	uaGGUGGGCGGAGUCGGAGGGUUUCAu	||:||| ||||:||||||||||||	atCCGCCCACCTCGGCCTCCCAAAGTg	>hsa_piR_022437|gb|DQ600690|Homo	NM_001206998.2	209	-54.87	2	26	5724	5750	24	0.875	0.9583	||||||||||	|| ||||:||
2602	uaGGUGGGCGGAGUCGGAGGGUUUCAu	|||||| |||::||||||||||||	atCCACCCACCTTGGCCTCCCAAAGTg	>hsa_piR_022437|gb|DQ600690|Homo	NM_001207053.2	209	-51.06	2	26	1472	1498	24	0.875	0.9583	||||||||||	|| |||::||
2603	uaGGUGGGCGGAGUCGGAGGGUUUCAu	|::||:|||||:||||||||||||	atCTGCCTGCCTCGGCCTCCCAAAGTg	>hsa_piR_022437|gb|DQ600690|Homo	NM_001207063.2	209	-53.22	2	26	3598	3624	24	0.8333	1	||||||||||	|:|||||:||
2604	uaGGUGGGCGGAGUCGGAGGGUUUCAu	|::||:|||||:||||||||||||	atCTGCCTGCCTCGGCCTCCCAAAGTg	>hsa_piR_022437|gb|DQ600690|Homo	NM_001207064.2	209	-53.22	2	26	3442	3468	24	0.8333	1	||||||||||	|:|||||:||
2605	uaGGUGGGCGGAGUCGGAGGGUUUCAu	|::||:|||||:||||||||||||	atCTGCCTGCCTCGGCCTCCCAAAGTg	>hsa_piR_022437|gb|DQ600690|Homo	NM_001207065.2	209	-53.22	2	26	3237	3263	24	0.8333	1	||||||||||	|:|||||:||
2606	uaGGUGGGCGGAGUCGGAGGGUUUCAu	||||||||||||||||||||||||	atCCACCCGCCTCAGCCTCCCAAAGTg	>hsa_piR_022437|gb|DQ600690|Homo	NM_001207067.2	225	-61.83	2	26	4084	4110	24	1	1	||||||||||	||||||||||
2607	uaGGUGGGCGGAGUCGGAGGGUUUCAu	|::||:||||::||||||||||||	gtCTGCCTGCCTTGGCCTCCCAAAGTg	>hsa_piR_022437|gb|DQ600690|Homo	NM_001207067.2	205	-48.63	2	26	4470	4496	24	0.7917	1	||||||||||	|:||||::||
2608	uaGGUGGGCGGAGUCGGAGGGUUUCAu	||||||||||||||||||||||||	atCCACCCGCCTCAGCCTCCCAAAGTg	>hsa_piR_022437|gb|DQ600690|Homo	NM_001207068.3	225	-61.83	2	26	4111	4137	24	1	1	||||||||||	||||||||||
2609	uaGGUGGGCGGAGUCGGAGGGUUUCAu	|::||:||||::||||||||||||	gtCTGCCTGCCTTGGCCTCCCAAAGTg	>hsa_piR_022437|gb|DQ600690|Homo	NM_001207068.3	205	-48.63	2	26	4497	4523	24	0.7917	1	||||||||||	|:||||::||
2610	uaGGUGGGCGGAGUCGGAGGGUUUCAu	|||||| |||||||||||||||||	atCCACCCACCTCAGCCTCCCAAAGTg	>hsa_piR_022437|gb|DQ600690|Homo	NM_001224.4	217	-55.99	2	26	2840	2866	24	0.9583	0.9583	||||||||||	|| |||||||
2611	uaGGUGGGCGGAGUCGGAGGGUUUCAu	|||||| ||||:||||||||||||	atCCACCCACCTCGGCCTCCCAAAGTg	>hsa_piR_022437|gb|DQ600690|Homo	NM_001228.4	213	-55.34	2	26	2058	2084	24	0.9167	0.9583	||||||||||	|| ||||:||
2612	uaGGUGGGCGGAGUCGGAGGGUUUCAu	| :||:||||:|||||||||||||	atCAGCCTGCCTTAGCCTCCCAAAGTg	>hsa_piR_022437|gb|DQ600690|Homo	NM_001229.5	205	-49.03	2	26	2673	2699	24	0.8333	0.9583	||||||||||	|:||||:|||
2613	uaGGUGGGCGGAGUCGGAGGGUUUCAu	||:||:|||||:||||||||||||	atCCGCCTGCCTCGGCCTCCCAAAGTg	>hsa_piR_022437|gb|DQ600690|Homo	NM_001242314.2	213	-57.91	2	26	4667	4693	24	0.875	1	||||||||||	|:|||||:||
2614	uaGGUGGGCGGAGUCGGAGGGUUUCAu	|| ||:||:|::||||||||||||	atCCTCCTGCTTTGGCCTCCCAAAGTa	>hsa_piR_022437|gb|DQ600690|Homo	NM_001242314.2	201	-46.87	2	26	8121	8147	24	0.7917	0.9583	||||||||||	|:||:|::||
2615	uaGGUGGGCGGAGUCGGAGGGUUUCAu	||:||:|||||:||||||||||||	atCCGCCTGCCTCGGCCTCCCAAAGTg	>hsa_piR_022437|gb|DQ600690|Homo	NM_001242317.2	213	-57.91	2	26	3931	3957	24	0.875	1	||||||||||	|:|||||:||
2616	uaGGUGGGCGGAGUCGGAGGGUUUCAu	|| ||:||:|::||||||||||||	atCCTCCTGCTTTGGCCTCCCAAAGTa	>hsa_piR_022437|gb|DQ600690|Homo	NM_001242317.2	201	-46.87	2	26	7385	7411	24	0.7917	0.9583	||||||||||	|:||:|::||
2617	uaGGUGGGCGGAGUCGGAGGGUUUCAu	|| ||:||||:| |||||||||||	atCCTCCTGCCTTA-CCTCCCAAAGTg	>hsa_piR_022437|gb|DQ600690|Homo	NM_001242336.2	195	-45.54	2	26	3732	3757	24	0.8333	0.9167	||||||||||	|:||||:| |
2618	uaGGUGGGCGGAGUCGGAGGGUUUCAu	|||||:|||||:||||||||||||	atCCACCTGCCTCGGCCTCCCAAAGTg	>hsa_piR_022437|gb|DQ600690|Homo	NM_001242385.1	217	-58.38	2	26	2884	2910	24	0.9167	1	||||||||||	|:|||||:||
2619	uaGGUGGGCGGAGUCGGAGGGUUUCAu	||||||| |||:||||||||||||	atCCACCCGACTCGGCCTCCCAAAGTg	>hsa_piR_022437|gb|DQ600690|Homo	NM_001242399.2	213	-54.69	2	26	3814	3840	24	0.9167	0.9583	||||||||||	||| |||:||
2620	uaGGUGGGCGGAGUCGGAGGGUUUCAu	||||||| |||:||||||||||||	atCCACCCGACTCGGCCTCCCAAAGTg	>hsa_piR_022437|gb|DQ600690|Homo	NM_001242400.2	213	-54.69	2	26	4099	4125	24	0.9167	0.9583	||||||||||	||| |||:||
2621	uaGGUGGGCGGAGUCGGAGGGUUUCAu	||||||| |||:||||||||||||	atCCACCCGACTCGGCCTCCCAAAGTg	>hsa_piR_022437|gb|DQ600690|Homo	NM_001242401.4	213	-54.69	2	26	3818	3844	24	0.9167	0.9583	||||||||||	||| |||:||
2622	uaGGUGGGCGGAGUCGGAGGGUUUCAu	|::||| |||::||||||||||||	gtCTGCCCACCTTGGCCTCCCAAAGTg	>hsa_piR_022437|gb|DQ600690|Homo	NM_001242401.4	201	-45.59	2	26	113	139	24	0.7917	0.9583	||||||||||	|| |||::||
2623	uaGGUGGGCGGAGUCGGAGGGUUUCAu	||||||| |||:||||||||||||	atCCACCCGACTCGGCCTCCCAAAGTg	>hsa_piR_022437|gb|DQ600690|Homo	NM_001242402.2	213	-54.69	2	26	3776	3802	24	0.9167	0.9583	||||||||||	||| |||:||
2624	uaGGUGGGCGGAGUCGGAGGGUUUCAu	||||||| |||:||||||||||||	atCCACCCGACTCGGCCTCCCAAAGTg	>hsa_piR_022437|gb|DQ600690|Homo	NM_001242403.2	213	-54.69	2	26	3984	4010	24	0.9167	0.9583	||||||||||	||| |||:||
2625	uaGGUGGGCGGAGUCGGAGGGUUUCAu	||||||| |||:||||||||||||	atCCACCCGACTCGGCCTCCCAAAGTg	>hsa_piR_022437|gb|DQ600690|Homo	NM_001242404.2	213	-54.69	2	26	3809	3835	24	0.9167	0.9583	||||||||||	||| |||:||
2626	uaGGUGGGCGGAGUCGGAGGGUUUCAu	||||||| |||:||||||||||||	atCCACCCGACTCGGCCTCCCAAAGTg	>hsa_piR_022437|gb|DQ600690|Homo	NM_001242405.2	213	-54.69	2	26	3704	3730	24	0.9167	0.9583	||||||||||	||| |||:||
2627	uaGGUGGGCGGAGUCGGAGGGUUUCAu	||||||| |||:||||||||||||	atCCACCCGACTCGGCCTCCCAAAGTg	>hsa_piR_022437|gb|DQ600690|Homo	NM_001242406.2	213	-54.69	2	26	4070	4096	24	0.9167	0.9583	||||||||||	||| |||:||
2628	uaGGUGGGCGGAGUCGGAGGGUUUCAu	||||||| |||:||||||||||||	atCCACCCGACTCGGCCTCCCAAAGTg	>hsa_piR_022437|gb|DQ600690|Homo	NM_001242460.1	213	-54.69	2	26	3601	3627	24	0.9167	0.9583	||||||||||	||| |||:||
2629	uaGGUGGGCGGAGUCGGAGGGUUUCAu	||||||| |||:||||||||||||	atCCACCCGACTCGGCCTCCCAAAGTg	>hsa_piR_022437|gb|DQ600690|Homo	NM_001242462.1	213	-54.69	2	26	3597	3623	24	0.9167	0.9583	||||||||||	||| |||:||
2630	uaGGUGGGCGGAGUCGGAGGGUUUCAu	|| ||| |||||||||||||||||	gtCCTCCCACCTCAGCCTCCCAAAGTg	>hsa_piR_022437|gb|DQ600690|Homo	NM_001242489.1	209	-51.29	2	26	365	391	24	0.9167	0.9167	||||||||||	|| |||||||
2631	uaGGUGGGCGGAGUCGGAGGGUUUCAu	|| ||| |||||||||||||||||	gtCCTCCCACCTCAGCCTCCCAAAGTg	>hsa_piR_022437|gb|DQ600690|Homo	NM_001242490.2	209	-51.29	2	26	256	282	24	0.9167	0.9167	||||||||||	|| |||||||
2632	uaGGUGGGCGGAGUCGGAGGGUUUCAu	|| ||| |||||||||||||||||	gtCCTCCCACCTCAGCCTCCCAAAGTg	>hsa_piR_022437|gb|DQ600690|Homo	NM_001242491.1	209	-51.29	2	26	312	338	24	0.9167	0.9167	||||||||||	|| |||||||
2633	uaGGUGGGCGGAGUCGGAGGGUUUCAu	|:::||||||::||||||||||||	atCTGTCCGCCTTGGCCTCCCAAAGTg	>hsa_piR_022437|gb|DQ600690|Homo	NM_001242599.2	205	-50.11	2	26	3627	3653	24	0.7917	1	||||||||||	||||||::||
2634	uaGGUGGGCGGAGUCGGAGGGUUUCAu	||||| ||||: ||||||||||||	atCCACCAGCCTTTGCCTCCCAAAGTg	>hsa_piR_022437|gb|DQ600690|Homo	NM_001242599.2	205	-46.55	2	26	4809	4835	24	0.875	0.9167	||||||||||	| ||||: ||
2635	uaGGUGGGCGGAGUCGGAGGGUUUCAu	|:::||||||::||||||||||||	atCTGTCCGCCTTGGCCTCCCAAAGTg	>hsa_piR_022437|gb|DQ600690|Homo	NM_001242600.2	205	-50.11	2	26	3609	3635	24	0.7917	1	||||||||||	||||||::||
2636	uaGGUGGGCGGAGUCGGAGGGUUUCAu	||||| ||||: ||||||||||||	atCCACCAGCCTTTGCCTCCCAAAGTg	>hsa_piR_022437|gb|DQ600690|Homo	NM_001242600.2	205	-46.55	2	26	4791	4817	24	0.875	0.9167	||||||||||	| ||||: ||
2637	uaGGUGGGCGGAGUCGGAGGGUUUCAu	||:||| ||||| |||||||||||	acCCGCCCACCTCAACCTCCCAAAGTc	>hsa_piR_022437|gb|DQ600690|Homo	NM_001242690.2	205	-44.94	2	26	3470	3496	24	0.875	0.9167	||||||||||	|| ||||| |
2638	uaGGUGGGCGGAGUCGGAGGGUUUCAu	|||||:|:|||:||||||||||||	atCCACCTGTCTCGGCCTCCCAAAGTg	>hsa_piR_022437|gb|DQ600690|Homo	NM_001242784.3	213	-56.09	2	26	579	605	24	0.875	1	||||||||||	|:|:|||:||
2639	uaGGUGGGCGGAGUCGGAGGGUUUCAu	|::||||||||:||||||||||||	atCTGCCCGCCTCGGCCTCCCAAAGTg	>hsa_piR_022437|gb|DQ600690|Homo	NM_001242827.1	213	-56.02	2	26	1803	1829	24	0.875	1	||||||||||	|||||||:||
2640	uaGGUGGGCGGAGUCGGAGGGUUUCAu	|::||:||||||||||||||||||	atCTGCCTGCCTCAGCCTCCCAAAGTg	>hsa_piR_022437|gb|DQ600690|Homo	NM_001242841.2	213	-53.87	2	26	467	493	24	0.875	1	||||||||||	|:||||||||
2641	uaGGUGGGCGGAGUCGGAGGGUUUCAu	|::|::|||||:||||||||||||	atCTGCTTGCCTCGGCCTCCCAAAGTg	>hsa_piR_022437|gb|DQ600690|Homo	NM_001242875.3	205	-50.49	2	26	3002	3028	24	0.7917	1	||||||||||	::|||||:||
2642	uaGGUGGGCGGAGUCGGAGGGUUUCAu	|::|::|||||:||||||||||||	atCTGCTTGCCTCGGCCTCCCAAAGTg	>hsa_piR_022437|gb|DQ600690|Homo	NM_001242876.3	205	-50.49	2	26	2792	2818	24	0.7917	1	||||||||||	::|||||:||
2643	uaGGUGGGCGGAGUCGGAGGGUUUCAu	|::|::|||||:||||||||||||	atCTGCTTGCCTCGGCCTCCCAAAGTg	>hsa_piR_022437|gb|DQ600690|Homo	NM_001242877.3	205	-50.49	2	26	2729	2755	24	0.7917	1	||||||||||	::|||||:||
2644	uaGGUGGGCGGAGUCGGAGGGUUUCAu	|::|::|||||:||||||||||||	atCTGCTTGCCTCGGCCTCCCAAAGTg	>hsa_piR_022437|gb|DQ600690|Homo	NM_001242878.3	205	-50.49	2	26	2597	2623	24	0.7917	1	||||||||||	::|||||:||
2645	uaGGUGGGCGGAGUCGGAGGGUUUCAu	|::|::|||||:||||||||||||	atCTGCTTGCCTCGGCCTCCCAAAGTg	>hsa_piR_022437|gb|DQ600690|Homo	NM_001242879.3	205	-50.49	2	26	2597	2623	24	0.7917	1	||||||||||	::|||||:||
2646	uaGGUGGGCGGAGUCGGAGGGUUUCAu	|||||| |||||||||||||||||	atCCACCCACCTCAGCCTCCCAAAGTg	>hsa_piR_022437|gb|DQ600690|Homo	NM_001242896.3	217	-55.99	2	26	6149	6175	24	0.9583	0.9583	||||||||||	|| |||||||
2647	uaGGUGGGCGGAGUCGGAGGGUUUCAu	|::||| ||||| |||||||||||	atCTGCCCACCTCAACCTCCCAAAGTg	>hsa_piR_022437|gb|DQ600690|Homo	NM_001242933.2	201	-44.56	2	26	4333	4359	24	0.8333	0.9167	||||||||||	|| ||||| |
2648	uagGUGGGCGGAGUCGGAGGGUUUCAu	:|::: :: ||||||||||||||	ttgTATTTTTTGCAGCCTCCCAAAGTt	>hsa_piR_022437|gb|DQ600690|Homo	NM_001242956.1	180	-30.72	2	25	2827	2853	23	0.6522	0.913	||||||||||	:: :: ||||
2649	uaGGUGGGCGGAGUCGGAGGGUUUCAu	|||||:|||||:||||||||||||	atCCACCTGCCTCGGCCTCCCAAAGTg	>hsa_piR_022437|gb|DQ600690|Homo	NM_001242957.3	217	-58.38	2	26	3042	3068	24	0.9167	1	||||||||||	|:|||||:||
2650	uaGGUGGGCGGAGUCGGAGGGUUUCAu	|| ||| |||||||||||||||||	atCCTCCCACCTCAGCCTCCCAAAGTa	>hsa_piR_022437|gb|DQ600690|Homo	NM_001243080.2	209	-51.7	2	26	1191	1217	24	0.9167	0.9167	||||||||||	|| |||||||
2651	uaGGUGGGCGGAGUCGGAGGGUUUCAu	|| ||| ||||:||||||||||||	atCCTCCCACCTCGGCCTCCCAAAGTa	>hsa_piR_022437|gb|DQ600690|Homo	NM_001243081.1	205	-51.05	2	26	1380	1406	24	0.875	0.9167	||||||||||	|| ||||:||
2652	uaGGUGGGCGGAGUCGGAGGGUUUCAu	||:||||:||::||||||||||||	atCCGCCCGTCTTGGCCTCCCAAAGTg	>hsa_piR_022437|gb|DQ600690|Homo	NM_001243120.1	209	-54.14	2	26	2723	2749	24	0.8333	1	||||||||||	|||:||::||
2653	uaGGUGGGCGGAGUCGGAGGGUUUCAu	|||||| |||::||||||||||||	atCCACCCACCTTGGCCTCCCAAAGTg	>hsa_piR_022437|gb|DQ600690|Homo	NM_001243126.1	209	-51.06	2	26	1602	1628	24	0.875	0.9583	||||||||||	|| |||::||
2654	uaGGUGGGCGGAGUCGGAGGGUUUCAu	|||||||||||:||||||||||||	atCCACCCGCCTCGGCCTCCCAAAGTg	>hsa_piR_022437|gb|DQ600690|Homo	NM_001243127.3	221	-61.18	2	26	4803	4829	24	0.9583	1	||||||||||	|||||||:||
2655	uaGGUGGGCGGAGUCGGAGGGUUUCAu	|::||:|| | |||||||||||||	atCTGCCTGCGTGAGCCTCCCAAAGTg	>hsa_piR_022437|gb|DQ600690|Homo	NM_001243372.2	197	-44.41	2	26	4938	4964	24	0.7917	0.9167	||||||||||	|:|| | |||
2656	uaGGUGGGCGGAGUCGGAGGGUUUCAu	|::||:|| | |||||||||||||	atCTGCCTGCGTGAGCCTCCCAAAGTg	>hsa_piR_022437|gb|DQ600690|Homo	NM_001243374.1	197	-44.41	2	26	4744	4770	24	0.7917	0.9167	||||||||||	|:|| | |||
2657	uaGGUGGGCGGAGUCGGAGGGUUUCAu	|:: ||||||||||||||||||||	atCTGGCCGCCTCAGCCTCCCAAAGTg	>hsa_piR_022437|gb|DQ600690|Homo	NM_001243438.2	209	-51.79	2	26	3364	3390	24	0.875	0.9583	||||||||||	||||||||||
2658	uagguGGGCGGAGUCGGAGGGUUUCAu	||| |||||||||||||||||	tgatcCCCACCTCAGCCTCCCAAAGTg	>hsa_piR_022437|gb|DQ600690|Homo	NM_001243438.2	202	-47.9	2	23	2935	2961	21	0.9524	0.9524	||||||||||	|| |||||||
2659	uaGGUGGGCGGAGUCGGAGGGUUUCAu	|::||:||||||||||||||||||	atCTGCCTGCCTCAGCCTCCCAAAGTg	>hsa_piR_022437|gb|DQ600690|Homo	NM_001243439.2	213	-53.87	2	26	5838	5864	24	0.875	1	||||||||||	|:||||||||
2660	uaggUGGGCGGAGUCGGAGGGUUUCAu	:||:|||||| |||||||||||	ataaGCCTGCCTCAACCTCCCAAAGTg	>hsa_piR_022437|gb|DQ600690|Homo	NM_001243439.2	199	-43.69	2	24	6727	6753	22	0.8636	0.9545	||||||||||	|:|||||| |
2661	uaGGUGGGCGGAGUCGGAGGGUUUCAu	||:|| |||||| |||||||||||	atCCGCCGGCCTCACCCTCCCAAAGTg	>hsa_piR_022437|gb|DQ600690|Homo	NM_001243564.1	205	-49.97	2	26	2305	2331	24	0.875	0.9167	||||||||||	| |||||| |
2662	uaGGUGGGCGGAGUCGGAGGGUUUCAu	||:|| |||||| |||||||||||	atCCGCCGGCCTCACCCTCCCAAAGTg	>hsa_piR_022437|gb|DQ600690|Homo	NM_001243565.1	205	-49.97	2	26	2290	2316	24	0.875	0.9167	||||||||||	| |||||| |
2663	uaGGUGGGCGGAGUCGGAGGGUUUCAu	||||||||||| ||||||||||||	atCCACCCGCCTCCGCCTCCCAAAGTg	>hsa_piR_022437|gb|DQ600690|Homo	NM_001243597.2	217	-56.42	2	26	4654	4680	24	0.9583	0.9583	||||||||||	||||||| ||
2664	uaGGUG-GGCGGAGUCGGAGGGUUUCAu	|||| ||| | |: ||||||||||	cgCCACTCCGACCCG--CTCCCAAAGTg	>hsa_piR_022437|gb|DQ600690|Homo	NM_001243611.1	173	-36.55	2	26	320	345	25	0.76	0.8	||||||||||	||| | |:
2665	uaGGUGGGCGGAGUCGGAGGGUUUCAu	|||:|||||||:||||||||||||	atCCATCCGCCTCGGCCTCCCAAAGTg	>hsa_piR_022437|gb|DQ600690|Homo	NM_001243650.2	217	-58.83	2	26	1483	1509	24	0.9167	1	||||||||||	|||||||:||
2666	uaGGUGGGCGGA---GUCGGAGGGUUUCAu	|||||:|||| | ||||||||||||	atCCACCTGCCTTGGCCGCCTCCCAAAGTg	>hsa_piR_022437|gb|DQ600690|Homo	NM_001243650.2	196	-48.67	2	26	1806	1835	27	0.8148	0.8519	||||||||||	||| | ||
2667	uaGGUGGGCGGAGUCGGAGGGUUUCAu	|| ||| |||||||||||||||||	atCCTCCCACCTCAGCCTCCCAAAGTg	>hsa_piR_022437|gb|DQ600690|Homo	NM_001243657.1	209	-51.6	2	26	495	521	24	0.9167	0.9167	||||||||||	|| |||||||
2668	uaGGUGGGCGGAGUCGGAGGGUUUCAu	:||:::|||||:||||||||||||	atTCATTTGCCTCGGCCTCCCAAAGTg	>hsa_piR_022437|gb|DQ600690|Homo	NM_001243767.1	205	-50.81	2	26	2724	2750	24	0.7917	1	||||||||||	::|||||:||
2669	uaGGUGGGCGGAGUCGGAGGGUUUCAu	:|| | ||| :||||||||||||	tcTCAAACTCCT-GGCCTCCCAAAGTg	>hsa_piR_022437|gb|DQ600690|Homo	NM_001243781.2	179	-34.27	2	26	4359	4384	24	0.75	0.8333	||||||||||	| ||| :||
2670	uaGGUGGGCGGAGUCGGAGGGUUUCAu	:|| | ||| :||||||||||||	tcTCAAACTCCT-GGCCTCCCAAAGTg	>hsa_piR_022437|gb|DQ600690|Homo	NM_001243782.2	179	-34.27	2	26	4310	4335	24	0.75	0.8333	||||||||||	| ||| :||
2671	uaGGUGGGCGGAGUCGGAGGGUUUCAu	||:||| ||||:||||||||||||	atCCGCCCACCTCGGCCTCCCAAAGTg	>hsa_piR_022437|gb|DQ600690|Homo	NM_001243783.3	209	-54.87	2	26	1086	1112	24	0.875	0.9583	||||||||||	|| ||||:||
2672	uaGGUGGGCGGAGUCGGAGGGUUUCAu	|||||:|:||::||||||||||||	atCCACCTGTCTTGGCCTCCCAAAGTg	>hsa_piR_022437|gb|DQ600690|Homo	NM_001243787.1	209	-51.81	2	26	2290	2316	24	0.8333	1	||||||||||	|:|:||::||
2673	uaGGUGGGCGGAGUCGGAGGGUUUCAu	|||||:|:||::||||||||||||	atCCACCTGTCTTGGCCTCCCAAAGTg	>hsa_piR_022437|gb|DQ600690|Homo	NM_001243788.1	209	-51.81	2	26	2206	2232	24	0.8333	1	||||||||||	|:|:||::||
2674	uaGGUGGGCGGAGUCGGAGGGUUUCAu	|||||:|:||::||||||||||||	atCCACCTGTCTTGGCCTCCCAAAGTg	>hsa_piR_022437|gb|DQ600690|Homo	NM_001243789.2	209	-51.81	2	26	1739	1765	24	0.8333	1	||||||||||	|:|:||::||
2675	uaGGUGGGCGGAGUCGGAGGGUUUCAu	|||||:|:||::||||||||||||	atCCACCTGTCTTGGCCTCCCAAAGTg	>hsa_piR_022437|gb|DQ600690|Homo	NM_001243790.2	209	-51.81	2	26	1658	1684	24	0.8333	1	||||||||||	|:|:||::||
2676	uaGGUGGGCGGAGUCGGAGGGUUUCAu	|||||:|:||::||||||||||||	atCCACCTGTCTTGGCCTCCCAAAGTg	>hsa_piR_022437|gb|DQ600690|Homo	NM_001243791.2	209	-51.81	2	26	1341	1367	24	0.8333	1	||||||||||	|:|:||::||
2677	uaGGUGGGCGGAGUCGGAGGGUUUCAu	|::||||||||:||||||||||||	atCTGCCCGCCTCGGCCTCCCAAAGTg	>hsa_piR_022437|gb|DQ600690|Homo	NM_001243794.2	213	-56.02	2	26	10812	10838	24	0.875	1	||||||||||	|||||||:||
2678	uaGGUGGGCGGAGUCGGAGGGUUUCAu	:|:||||||||:||||||||||||	atTCGCCCGCCTCGGCCTCCCAAAGTg	>hsa_piR_022437|gb|DQ600690|Homo	NM_001243794.2	213	-57.88	2	26	15185	15211	24	0.875	1	||||||||||	|||||||:||
2679	uaGGUGGGCGGAGUCGGAGGGUUUCAu	|| :|:||||||||||||||||||	ctCCTTCTGCCTCAGCCTCCCAAAGTg	>hsa_piR_022437|gb|DQ600690|Homo	NM_001243794.2	209	-50.9	2	26	7432	7458	24	0.875	0.9583	||||||||||	|:||||||||
2680	uaGGUGGGCGGAGUCGGAGGGUUUCAu	|| ||:|| ||| |||||||||||	acCCTCCTGCATCACCCTCCCAAAGTg	>hsa_piR_022437|gb|DQ600690|Homo	NM_001243794.2	197	-39.04	2	26	3526	3552	24	0.8333	0.875	||||||||||	|:|| ||| |
2681	uaGGUGGGCGGAGUCGGAGGGUUUCAu	|::||||||||:||||||||||||	atCTGCCCGCCTCGGCCTCCCAAAGTg	>hsa_piR_022437|gb|DQ600690|Homo	NM_001243795.2	213	-56.02	2	26	10826	10852	24	0.875	1	||||||||||	|||||||:||
2682	uaGGUGGGCGGAGUCGGAGGGUUUCAu	:|:||||||||:||||||||||||	atTCGCCCGCCTCGGCCTCCCAAAGTg	>hsa_piR_022437|gb|DQ600690|Homo	NM_001243795.2	213	-57.88	2	26	15199	15225	24	0.875	1	||||||||||	|||||||:||
2683	uaGGUGGGCGGAGUCGGAGGGUUUCAu	|| :|:||||||||||||||||||	ctCCTTCTGCCTCAGCCTCCCAAAGTg	>hsa_piR_022437|gb|DQ600690|Homo	NM_001243795.2	209	-50.9	2	26	7446	7472	24	0.875	0.9583	||||||||||	|:||||||||
2684	uaGGUGGGCGGAGUCGGAGGGUUUCAu	|| ||:|| ||| |||||||||||	acCCTCCTGCATCACCCTCCCAAAGTg	>hsa_piR_022437|gb|DQ600690|Homo	NM_001243795.2	197	-39.04	2	26	3540	3566	24	0.8333	0.875	||||||||||	|:|| ||| |
2685	uaGGUGGGCGGAGUCGGAGGGUUUCAu	|::||:||||||||||||||||||	atCTGCCTGCCTCAGCCTCCCAAAGTg	>hsa_piR_022437|gb|DQ600690|Homo	NM_001244189.2	213	-53.87	2	26	7425	7451	24	0.875	1	||||||||||	|:||||||||
2686	uaGGUGGGCGGAGUCGGAGGGUUUCAu	|::||:||||||||||||||||||	atCTGCCTGCCTCAGCCTCCCAAAGTg	>hsa_piR_022437|gb|DQ600690|Homo	NM_001244190.2	213	-53.87	2	26	7183	7209	24	0.875	1	||||||||||	|:||||||||
2687	uaGGUGGGCGGAGUCGGAGGGUUUCAu	|::||:||||||||||||||||||	atCTGCCTGCCTCAGCCTCCCAAAGTg	>hsa_piR_022437|gb|DQ600690|Homo	NM_001244192.2	213	-53.87	2	26	7114	7140	24	0.875	1	||||||||||	|:||||||||
2688	uaGGUGGGCGGAGUCGGAGGGUUUCAu	|::|||||||::||||||||||||	atCTGCCCGCCTTGGCCTCCCAAAGTg	>hsa_piR_022437|gb|DQ600690|Homo	NM_001244710.2	209	-51.74	2	26	7879	7905	24	0.8333	1	||||||||||	||||||::||
2689	uaGGUGGGCGGAGUCGGAGGGUUUCAu	||||||||||||||||||||||||	atCCACCCGCCTCAGCCTCCCAAAGTg	>hsa_piR_022437|gb|DQ600690|Homo	NM_001244734.2	225	-61.83	2	26	3125	3151	24	1	1	||||||||||	||||||||||
2690	uaGGUGGGCGGAGUCGGAGGGUUUCAu	||:||| || ||||||||||||||	atCCGCCCTCCCCAGCCTCCCAAAGTg	>hsa_piR_022437|gb|DQ600690|Homo	NM_001244766.2	205	-49.94	2	26	4633	4659	24	0.875	0.9167	||||||||||	|| || ||||
2691	uaGGUGGGCGGAGUCGGAGGGUUUCAu	|:|||| ||||:||||||||||||	atCTACCCACCTCGGCCTCCCAAAGTa	>hsa_piR_022437|gb|DQ600690|Homo	NM_001244767.2	209	-52.73	2	26	1432	1458	24	0.875	0.9583	||||||||||	|| ||||:||
2692	uaGGUGGGCGGAGUCGGAGGGUUUCAu	|::||| ||||:||||||||||||	atCTGCCCTCCTCGGCCTCCCAAAGTg	>hsa_piR_022437|gb|DQ600690|Homo	NM_001245.7	205	-49.79	2	26	2392	2418	24	0.8333	0.9583	||||||||||	|| ||||:||
2693	uaGGUGGGCGGAGUCGGAGGGUUUCAu	|:|||| ||||:||||||||||||	atCTACCCTCCTCGGCCTCCCAAAGTa	>hsa_piR_022437|gb|DQ600690|Homo	NM_001247987.2	209	-52.34	2	26	3338	3364	24	0.875	0.9583	||||||||||	|| ||||:||
2694	uaGGUGGGCGGAGUCGGAGGGUUUCAu	||:||| |:||:||||||||||||	atCCGCCCACTTCGGCCTCCCAAAGTg	>hsa_piR_022437|gb|DQ600690|Homo	NM_001248002.2	205	-51.93	2	26	5142	5168	24	0.8333	0.9583	||||||||||	|| |:||:||
2695	uaGGUGGGCGGAGUCGGAGGGUUUCAu	||:||| |:||:||||||||||||	atCCGCCCACTTCGGCCTCCCAAAGTg	>hsa_piR_022437|gb|DQ600690|Homo	NM_001248003.2	205	-51.93	2	26	5073	5099	24	0.8333	0.9583	||||||||||	|| |:||:||
2696	uaGGUGGGCGGAGUCGGAGGGUUUCAu	||:||| |:||:||||||||||||	atCCGCCCACTTCGGCCTCCCAAAGTg	>hsa_piR_022437|gb|DQ600690|Homo	NM_001248004.2	205	-51.93	2	26	5040	5066	24	0.8333	0.9583	||||||||||	|| |:||:||
2697	uaGGUGGGCGGAGUCGGAGGGUUUCAu	||:||| |:||:||||||||||||	atCCGCCCACTTCGGCCTCCCAAAGTg	>hsa_piR_022437|gb|DQ600690|Homo	NM_001248005.2	205	-51.93	2	26	4964	4990	24	0.8333	0.9583	||||||||||	|| |:||:||
2698	uaGGUGGGCGGAGUCGGAGGGUUUCAu	|::|||||||||||||||||||||	atCTGCCCGCCTCAGCCTCCCAAAGTg	>hsa_piR_022437|gb|DQ600690|Homo	NM_001251828.2	217	-56.67	2	26	2271	2297	24	0.9167	1	||||||||||	||||||||||
2699	uaGGUGGGCGGAGUCGGAGGGUUUCAu	|::||:||||||||||||||||||	atCTGCCTGCCTCAGCCTCCCAAAGTa	>hsa_piR_022437|gb|DQ600690|Homo	NM_001251877.2	213	-53.97	2	26	1378	1404	24	0.875	1	||||||||||	|:||||||||
2700	uaGGUGGGCGGAGUCGGAGGGUUUCAu	||:|| |||||:||||||||||||	atCCGCCAGCCTCGGCCTCCCAAAGTg	>hsa_piR_022437|gb|DQ600690|Homo	NM_001251877.2	209	-53.15	2	26	1101	1127	24	0.875	0.9583	||||||||||	| |||||:||
2701	uaGGUGGGCGGAGUCGGAGGGUUUCAu	||::|:|||||:||||||||||||	atCCGTCTGCCTCGGCCTCCCAAAGTg	>hsa_piR_022437|gb|DQ600690|Homo	NM_001251877.2	209	-55.14	2	26	1236	1262	24	0.8333	1	||||||||||	|:|||||:||
2702	uaGGUGGGCGGAGUCGGAGGGUUUCAu	|::|||||||||||||||||||||	atCTGCCCGCCTCAGCCTCCCAAAGTa	>hsa_piR_022437|gb|DQ600690|Homo	NM_001251917.2	217	-56.77	2	26	11535	11561	24	0.9167	1	||||||||||	||||||||||
2703	uaGGUGGGCGGAGUCGGAGGGUUUCAu	|||:|:||:|||||||||||||||	atCCATCTGCTTCAGCCTCCCAAAGTg	>hsa_piR_022437|gb|DQ600690|Homo	NM_001251917.2	213	-53.74	2	26	7450	7476	24	0.875	1	||||||||||	|:||:|||||
2704	uaGGUGGGCGGAGUCGGAGGGUUUCAu	||:||:|| |||||||||||||||	atCCGCCTGCGTCAGCCTCCCAAAGTg	>hsa_piR_022437|gb|DQ600690|Homo	NM_001251917.2	209	-53.39	2	26	4662	4688	24	0.875	0.9583	||||||||||	|:|| |||||
2705	uagguGGGCGGAGUCGGAGGGUUUCAu	| | |||::||||||||||||	agtgtCACACCTTGGCCTCCCAAAGTg	>hsa_piR_022437|gb|DQ600690|Homo	NM_001251917.2	186	-38.62	2	23	10789	10815	21	0.8095	0.9048	||||||||||	| |||::||
2706	uaGGUGGGCGGAGUCGGAGGGUUUCAu	|::|||||||||||||||||||||	atCTGCCCGCCTCAGCCTCCCAAAGTa	>hsa_piR_022437|gb|DQ600690|Homo	NM_001251918.2	217	-56.77	2	26	11526	11552	24	0.9167	1	||||||||||	||||||||||
2707	uaGGUGGGCGGAGUCGGAGGGUUUCAu	|||:|:||:|||||||||||||||	atCCATCTGCTTCAGCCTCCCAAAGTg	>hsa_piR_022437|gb|DQ600690|Homo	NM_001251918.2	213	-53.74	2	26	7441	7467	24	0.875	1	||||||||||	|:||:|||||
2708	uaGGUGGGCGGAGUCGGAGGGUUUCAu	||:||:|| |||||||||||||||	atCCGCCTGCGTCAGCCTCCCAAAGTg	>hsa_piR_022437|gb|DQ600690|Homo	NM_001251918.2	209	-53.39	2	26	4653	4679	24	0.875	0.9583	||||||||||	|:|| |||||
2709	uagguGGGCGGAGUCGGAGGGUUUCAu	| | |||::||||||||||||	agtgtCACACCTTGGCCTCCCAAAGTg	>hsa_piR_022437|gb|DQ600690|Homo	NM_001251918.2	186	-38.62	2	23	10780	10806	21	0.8095	0.9048	||||||||||	| |||::||
2710	uaGGUGGGCGGAGUCGGAGGGUUUCAu	|::|||||||||||||||||||||	atCTGCCCGCCTCAGCCTCCCAAAGTa	>hsa_piR_022437|gb|DQ600690|Homo	NM_001251921.2	217	-56.77	2	26	11595	11621	24	0.9167	1	||||||||||	||||||||||
2711	uaGGUGGGCGGAGUCGGAGGGUUUCAu	|||:|:||:|||||||||||||||	atCCATCTGCTTCAGCCTCCCAAAGTg	>hsa_piR_022437|gb|DQ600690|Homo	NM_001251921.2	213	-53.74	2	26	7510	7536	24	0.875	1	||||||||||	|:||:|||||
2712	uaGGUGGGCGGAGUCGGAGGGUUUCAu	||:||:|| |||||||||||||||	atCCGCCTGCGTCAGCCTCCCAAAGTg	>hsa_piR_022437|gb|DQ600690|Homo	NM_001251921.2	209	-53.39	2	26	4722	4748	24	0.875	0.9583	||||||||||	|:|| |||||
2713	uagguGGGCGGAGUCGGAGGGUUUCAu	| | |||::||||||||||||	agtgtCACACCTTGGCCTCCCAAAGTg	>hsa_piR_022437|gb|DQ600690|Homo	NM_001251921.2	186	-38.62	2	23	10849	10875	21	0.8095	0.9048	||||||||||	| |||::||
2714	uaGGUGGGCGGAGUCGGAGGGUUUCAu	|::|||||||||||||||||||||	atCTGCCCGCCTCAGCCTCCCAAAGTa	>hsa_piR_022437|gb|DQ600690|Homo	NM_001251922.2	217	-56.77	2	26	11511	11537	24	0.9167	1	||||||||||	||||||||||
2715	uaGGUGGGCGGAGUCGGAGGGUUUCAu	|||:|:||:|||||||||||||||	atCCATCTGCTTCAGCCTCCCAAAGTg	>hsa_piR_022437|gb|DQ600690|Homo	NM_001251922.2	213	-53.74	2	26	7426	7452	24	0.875	1	||||||||||	|:||:|||||
2716	uaGGUGGGCGGAGUCGGAGGGUUUCAu	||:||:|| |||||||||||||||	atCCGCCTGCGTCAGCCTCCCAAAGTg	>hsa_piR_022437|gb|DQ600690|Homo	NM_001251922.2	209	-53.39	2	26	4638	4664	24	0.875	0.9583	||||||||||	|:|| |||||
2717	uagguGGGCGGAGUCGGAGGGUUUCAu	| | |||::||||||||||||	agtgtCACACCTTGGCCTCCCAAAGTg	>hsa_piR_022437|gb|DQ600690|Homo	NM_001251922.2	186	-38.62	2	23	10765	10791	21	0.8095	0.9048	||||||||||	| |||::||
2718	uaGGUGGGCGGAGUCGGAGGGUUUCAu	||:||:||||::||||||||||||	atCCGCCTGCCTTGGCCTCCCAAAGTg	>hsa_piR_022437|gb|DQ600690|Homo	NM_001251977.2	209	-53.63	2	26	4442	4468	24	0.8333	1	||||||||||	|:||||::||
2719	uaGGUGGGCGGAGUCGGAGGGUUUCAu	||:||:||||::||||||||||||	atCCGCCTGCCTTGGCCTCCCAAAGTg	>hsa_piR_022437|gb|DQ600690|Homo	NM_001251979.2	209	-53.63	2	26	4280	4306	24	0.8333	1	||||||||||	|:||||::||
2720	uaGGUGGGCGGAGUCGGAGGGUUUCAu	|||||| |||::||||||||||||	atCCACCCACCTTGGCCTCCCAAAGTg	>hsa_piR_022437|gb|DQ600690|Homo	NM_001252036.1	209	-51.06	2	26	3944	3970	24	0.875	0.9583	||||||||||	|| |||::||
2721	uaGGUGGGCGGAGUCGGAGGGUUUCAu	|||||| |||::||||||||||||	atCCACCCACCTTGGCCTCCCAAAGTg	>hsa_piR_022437|gb|DQ600690|Homo	NM_001252037.1	209	-51.06	2	26	3862	3888	24	0.875	0.9583	||||||||||	|| |||::||
2722	uaGGUGGGCGGAGUCGGAGGGUUUCAu	|||:|| ||||:||||||||||||	atCCATCCACCTCGGCCTCCCAAAGTg	>hsa_piR_022437|gb|DQ600690|Homo	NM_001252078.2	209	-52.99	2	26	13158	13184	24	0.875	0.9583	||||||||||	|| ||||:||
2723	uaGGUGGGCGGAGUCGGAGGGUUUCAu	:||||||||||:||||||||||||	atTCACCCGCCTCGGCCTCCCAAAGTg	>hsa_piR_022437|gb|DQ600690|Homo	NM_001252091.1	217	-58.35	2	26	185	211	24	0.9167	1	||||||||||	|||||||:||
2724	uaGGUGGGCGGAGUCGGAGGGUUUCAu	|::|||||||||||||||||||||	atCTGCCCGCCTCAGCCTCCCAAAGTg	>hsa_piR_022437|gb|DQ600690|Homo	NM_001252127.2	217	-56.67	2	26	5996	6022	24	0.9167	1	||||||||||	||||||||||
2725	uaGGUGGGCGGAGUCGGAGGGUUUCAu	|||||:||||||||||||||||||	atCCACCTGCCTCAGCCTCCCAAAGTg	>hsa_piR_022437|gb|DQ600690|Homo	NM_001252335.2	221	-59.03	2	26	4852	4878	24	0.9583	1	||||||||||	|:||||||||
2726	uaGGUGGGCGGAGUCGGAGGGUUUCAu	|||||| |: :||||||||||||	atCCACCCACTAAGGCCTCCCAAAGTg	>hsa_piR_022437|gb|DQ600690|Homo	NM_001252383.2	193	-44.62	2	26	244	270	24	0.7917	0.875	||||||||||	|| |: :||
2727	uaGGUGGGCGGAGUCGGAGGGUUUCAu	|::||| |||||||||||||||||	atCTGCCCACCTCAGCCTCCCAAAGTg	>hsa_piR_022437|gb|DQ600690|Homo	NM_001252511.1	209	-50.83	2	26	3956	3982	24	0.875	0.9583	||||||||||	|| |||||||
2728	uaGGUGGGCGGAGUCGGAGGGUUUCAu	|::||| |||||||||||||||||	atCTGCCCACCTCAGCCTCCCAAAGTg	>hsa_piR_022437|gb|DQ600690|Homo	NM_001252512.1	209	-50.83	2	26	3889	3915	24	0.875	0.9583	||||||||||	|| |||||||
2729	uaGGUGGGCGGAGUCGGAGGGUUUCAu	||||||||| ::||||||||||||	atCCACCCGCCATGGCCTCCCAAAGTg	>hsa_piR_022437|gb|DQ600690|Homo	NM_001252652.2	209	-53.07	2	26	4189	4215	24	0.875	0.9583	||||||||||	||||| ::||
2730	uaGGUGGGCGGAGUCGGAGGGUUUCAu	|||||: ||||:||||||||||||	atCCACCTACCTCGGCCTCCCAAAGTg	>hsa_piR_022437|gb|DQ600690|Homo	NM_001253.4	209	-52.39	2	26	5919	5945	24	0.875	0.9583	||||||||||	|: ||||:||
2731	uaGGUGGGCGGAGUCGGAGGGUUUCAu	|||||:||||::||||||||||||	atCCACCTGCCTTGGCCTCCCAAAGTg	>hsa_piR_022437|gb|DQ600690|Homo	NM_001253384.2	213	-54.1	2	26	1216	1242	24	0.875	1	||||||||||	|:||||::||
2732	uaGGUGGGCGGAGUCGGAGGGUUUCAu	|| |||||||::||||||||||||	atCCTCCCGCCTTGGCCTCCCAAAGTg	>hsa_piR_022437|gb|DQ600690|Homo	NM_001253384.2	209	-52.51	2	26	2027	2053	24	0.875	0.9583	||||||||||	||||||::||
2733	uaGGUGGGCGGAGUCGGAGGGUUUCAu	||:||| :||||||||||||||||	atCCGCCCATCTCAGCCTCCCAAAGTa	>hsa_piR_022437|gb|DQ600690|Homo	NM_001253384.2	209	-53.61	2	26	2860	2886	24	0.875	0.9583	||||||||||	|| :||||||
2734	uagguGGGCGGAGUCGGAGGGUUUCAu	||:||||::||||||||||||	gcaatCCTGCCTTGGCCTCCCAAAGTg	>hsa_piR_022437|gb|DQ600690|Homo	NM_001253384.2	198	-44.63	2	23	1347	1373	21	0.8571	1	||||||||||	|:||||::||
2735	uaGGUGGGCGGAGUCGGAGGGUUUCAu	|||||| |||:: |||||||||||	atCCACCCACCTTGCCCTCCCAAAGTg	>hsa_piR_022437|gb|DQ600690|Homo	NM_001253798.2	201	-46.16	2	26	3059	3085	24	0.8333	0.9167	||||||||||	|| |||:: |
2736	uaGGUGGGCGGAGUCGGAGGGUUUCAu	|||||| |||:: |||||||||||	atCCACCCACCTTGCCCTCCCAAAGTg	>hsa_piR_022437|gb|DQ600690|Homo	NM_001253799.2	201	-46.16	2	26	3029	3055	24	0.8333	0.9167	||||||||||	|| |||:: |
2737	uaGGUGGGCGGAGUCGGAGGGUUUCAu	|||||| |||:: |||||||||||	atCCACCCACCTTGCCCTCCCAAAGTg	>hsa_piR_022437|gb|DQ600690|Homo	NM_001253800.1	201	-46.16	2	26	2847	2873	24	0.8333	0.9167	||||||||||	|| |||:: |
2738	uaGGUGGGCGGAGUCGGAGGGUUUCAu	|||||| |||:: |||||||||||	atCCACCCACCTTGCCCTCCCAAAGTg	>hsa_piR_022437|gb|DQ600690|Homo	NM_001253801.2	201	-46.16	2	26	2810	2836	24	0.8333	0.9167	||||||||||	|| |||:: |
2739	uaGGUGGGCGGAGUCGGAGGGUUUCAu	:| ||:|||||||:||||||||||	atTCTCCTGCCTCAGTCTCCCAAAGTg	>hsa_piR_022437|gb|DQ600690|Homo	NM_001253854.2	205	-49.52	2	26	442	468	24	0.8333	0.9583	||||||||||	|:|||||||:
2740	uaGGUGGGCGGAGUCGGAGGGUUUCAu	|||||:||:|||||||||||||||	atCCACCTGCTTCAGCCTCCCAAAGTg	>hsa_piR_022437|gb|DQ600690|Homo	NM_001254728.1	217	-56.09	2	26	2256	2282	24	0.9167	1	||||||||||	|:||:|||||
2741	uaGGUGGGCGGAGUCGGAGGGUUUCAu	|||||:||:|||||||||||||||	atCCACCTGCTTCAGCCTCCCAAAGTg	>hsa_piR_022437|gb|DQ600690|Homo	NM_001254729.1	217	-56.09	2	26	1774	1800	24	0.9167	1	||||||||||	|:||:|||||
2742	uaGGUGGGCGGAGUCGGAGGGUUUCAu	|::||||||||:||||||||||||	atCTGCCCGCCTCGGCCTCCCAAAGTg	>hsa_piR_022437|gb|DQ600690|Homo	NM_001254740.2	213	-56.02	2	26	2133	2159	24	0.875	1	||||||||||	|||||||:||
2743	uaGGUGGGCGGAGUCGGAGGGUUUCAu	|::||| |||||||||||||||||	atCTGCCCACCTCAGCCTCCCAAAGTg	>hsa_piR_022437|gb|DQ600690|Homo	NM_001255985.1	209	-50.83	2	26	122	148	24	0.875	0.9583	||||||||||	|| |||||||
2744	uaGGUGGG-C-GGAGUCGGAGGGUUUCAu	|| ||: | :|||| :||||||||||	ccCCTCCTAGTTCTCA-TCTCCCAAAGTc	>hsa_piR_022437|gb|DQ600690|Homo	NM_001256023.1	173	-31.64	2	26	1765	1792	26	0.7308	0.8462	||||||||||	| :|||| :
2745	uaGGUGGGCGGAGUCGGAGGGUUUCAu	|::||| |||||||||||||||||	atCTGCCCACCTCAGCCTCCCAAAGTg	>hsa_piR_022437|gb|DQ600690|Homo	NM_001256046.2	209	-50.83	2	26	3984	4010	24	0.875	0.9583	||||||||||	|| |||||||
2746	uaGGUGGGCGGAGUCGGAGGGUUUCAu	|::||| |||||||||||||||||	atCTGCCCACCTCAGCCTCCCAAAGTg	>hsa_piR_022437|gb|DQ600690|Homo	NM_001256047.1	209	-50.83	2	26	4129	4155	24	0.875	0.9583	||||||||||	|| |||||||
2747	uaGGUGGGCGGAGUCGGAGGGUUUCAu	|::||||||||:||||||||||||	atCTGCCCGCCTCGGCCTCCCAAAGTg	>hsa_piR_022437|gb|DQ600690|Homo	NM_001256141.2	213	-56.02	2	26	3015	3041	24	0.875	1	||||||||||	|||||||:||
2748	uaGGUGGGCGGAGUCGGAGGGUUUCAu	|| ||: |||::|:||||||||||	atCCTCCTACCTTGGTCTCCCAAAGTg	>hsa_piR_022437|gb|DQ600690|Homo	NM_001256172.2	193	-41.43	2	26	594	620	24	0.75	0.9167	||||||||||	|: |||::|:
2749	uaGGUGGGCGGAGUCGGAGGGUUUCAu	||||||||||::||||||||||||	atCCACCCGCCTTGGCCTCCCAAAGTg	>hsa_piR_022437|gb|DQ600690|Homo	NM_001256279.2	217	-56.9	2	26	7006	7032	24	0.9167	1	||||||||||	||||||::||
2750	uaGGUGGGCGGAGUCGGAGGGUUUCAu	|||||:|||||:||||||||||||	atCCACCTGCCTCGGCCTCCCAAAGTg	>hsa_piR_022437|gb|DQ600690|Homo	NM_001256279.2	217	-58.38	2	26	17032	17058	24	0.9167	1	||||||||||	|:|||||:||
2751	uaGGUGGGCGGAGUCGGAGGGUUUCAu	|||||| ||||:||||||||||||	atCCACCCACCTCGGCCTCCCAAAGTg	>hsa_piR_022437|gb|DQ600690|Homo	NM_001256279.2	213	-55.34	2	26	12084	12110	24	0.9167	0.9583	||||||||||	|| ||||:||
2752	uaGGUGGGCGGAGUCGGAGGGUUUCAu	|::|||||||::||||||||||||	atCTGCCCGCCTTGGCCTCCCAAAGTg	>hsa_piR_022437|gb|DQ600690|Homo	NM_001256279.2	209	-51.74	2	26	17460	17486	24	0.8333	1	||||||||||	||||||::||
2753	uaGGUGGGCGGAGUCGGAGGGUUUCAu	|::||| |:|||||||||||||||	atCTGCCCACTTCAGCCTCCCAAAGTc	>hsa_piR_022437|gb|DQ600690|Homo	NM_001256279.2	205	-45.7	2	26	3512	3538	24	0.8333	0.9583	||||||||||	|| |:|||||
2754	uaGGUGGGCGGAGUCGGAGGGUUUCAu	||||||||||::||||||||||||	atCCACCCGCCTTGGCCTCCCAAAGTg	>hsa_piR_022437|gb|DQ600690|Homo	NM_001256280.2	217	-56.9	2	26	6811	6837	24	0.9167	1	||||||||||	||||||::||
2755	uaGGUGGGCGGAGUCGGAGGGUUUCAu	|||||:|||||:||||||||||||	atCCACCTGCCTCGGCCTCCCAAAGTg	>hsa_piR_022437|gb|DQ600690|Homo	NM_001256280.2	217	-58.38	2	26	16837	16863	24	0.9167	1	||||||||||	|:|||||:||
2756	uaGGUGGGCGGAGUCGGAGGGUUUCAu	|||||| ||||:||||||||||||	atCCACCCACCTCGGCCTCCCAAAGTg	>hsa_piR_022437|gb|DQ600690|Homo	NM_001256280.2	213	-55.34	2	26	11889	11915	24	0.9167	0.9583	||||||||||	|| ||||:||
2757	uaGGUGGGCGGAGUCGGAGGGUUUCAu	|::|||||||::||||||||||||	atCTGCCCGCCTTGGCCTCCCAAAGTg	>hsa_piR_022437|gb|DQ600690|Homo	NM_001256280.2	209	-51.74	2	26	17265	17291	24	0.8333	1	||||||||||	||||||::||
2758	uaGGUGGGCGGAGUCGGAGGGUUUCAu	|::||| |:|||||||||||||||	atCTGCCCACTTCAGCCTCCCAAAGTc	>hsa_piR_022437|gb|DQ600690|Homo	NM_001256280.2	205	-45.7	2	26	3317	3343	24	0.8333	0.9583	||||||||||	|| |:|||||
2759	uaGGUGGGCGGAGUCGGAGGGUUUCAu	|||:||||| ||||||||||||||	acCCATCCGCCACAGCCTCCCAAAGTg	>hsa_piR_022437|gb|DQ600690|Homo	NM_001256316.2	213	-52.07	2	26	9625	9651	24	0.9167	0.9583	||||||||||	||||| ||||
2760	uaGGUGGGCGGAGUCGGAGGGUUUCAu	|||||| |||::||||||||||||	atCCACCCACCTTGGCCTCCCAAAGTg	>hsa_piR_022437|gb|DQ600690|Homo	NM_001256404.2	209	-51.06	2	26	5442	5468	24	0.875	0.9583	||||||||||	|| |||::||
2761	uaGGUGGGCGGAGUCGGAGGGUUUCAu	|:: |||||||:||||||||||||	atCTGACCGCCTCGGCCTCCCAAAGTg	>hsa_piR_022437|gb|DQ600690|Homo	NM_001256414.2	205	-51.03	2	26	5622	5648	24	0.8333	0.9583	||||||||||	|||||||:||
2762	uaGGUGGGCGGAGUCGGAGGGUUUCAu	|::||| ||||:||||||||||||	atCTGCCCACCTCGGCCTCCCAAAGTg	>hsa_piR_022437|gb|DQ600690|Homo	NM_001256429.2	205	-50.18	2	26	386	412	24	0.8333	0.9583	||||||||||	|| ||||:||
2763	uaGGUGGGCGGAGUCGGAGGGUUUCAu	|: || ||||||||||||||||||	atCTTCCGGCCTCAGCCTCCCAAAGTg	>hsa_piR_022437|gb|DQ600690|Homo	NM_001256566.2	205	-49.09	2	26	1527	1553	24	0.875	0.9167	||||||||||	| ||||||||
2764	uaGGUGGGCGGAGUCGGAGGGUUUCAu	|: ||: :||||||||||||||||	atCTTCCTATCTCAGCCTCCCAAAGTg	>hsa_piR_022437|gb|DQ600690|Homo	NM_001256566.2	197	-44.19	2	26	2120	2146	24	0.7917	0.9167	||||||||||	|: :||||||
2765	uaGGUGGGCGGAGUCGGAGGGUUUCAu	|||||:|||||:||||||||||||	acCCACCTGCCTCGGCCTCCCAAAGTg	>hsa_piR_022437|gb|DQ600690|Homo	NM_001256567.3	217	-56.26	2	26	1185	1211	24	0.9167	1	||||||||||	|:|||||:||
2766	uaGGUGGGCGGAGUCGGAGGGUUUCAu	|::||:|||| :||||||||||||	atCTGCCTGCCTAGGCCTCCCAAAGTg	>hsa_piR_022437|gb|DQ600690|Homo	NM_001256672.2	201	-46.91	2	26	4069	4095	24	0.7917	0.9583	||||||||||	|:|||| :||
2767	uaGGUGGGCGGAGUCGGAGGGUUUCAu	|| ||| || ||||||||||||||	atCCTCCCACCACAGCCTCCCAAAGTg	>hsa_piR_022437|gb|DQ600690|Homo	NM_001256672.2	201	-46.31	2	26	4383	4409	24	0.875	0.875	||||||||||	|| || ||||
2768	uaGGUGGGCGGAGUCGGAGGGUUUCAu	|::||:|||| :||||||||||||	atCTGCCTGCCTAGGCCTCCCAAAGTg	>hsa_piR_022437|gb|DQ600690|Homo	NM_001256674.2	201	-46.91	2	26	3919	3945	24	0.7917	0.9583	||||||||||	|:|||| :||
2769	uaGGUGGGCGGAGUCGGAGGGUUUCAu	|| ||| || ||||||||||||||	atCCTCCCACCACAGCCTCCCAAAGTg	>hsa_piR_022437|gb|DQ600690|Homo	NM_001256674.2	201	-46.31	2	26	4233	4259	24	0.875	0.875	||||||||||	|| || ||||
2770	uaGGUGGGCGGAGUCGGAGGGUUUCAu	|::||:|||| :||||||||||||	atCTGCCTGCCTAGGCCTCCCAAAGTg	>hsa_piR_022437|gb|DQ600690|Homo	NM_001256675.2	201	-46.91	2	26	3859	3885	24	0.7917	0.9583	||||||||||	|:|||| :||
2771	uaGGUGGGCGGAGUCGGAGGGUUUCAu	|| ||| || ||||||||||||||	atCCTCCCACCACAGCCTCCCAAAGTg	>hsa_piR_022437|gb|DQ600690|Homo	NM_001256675.2	201	-46.31	2	26	4173	4199	24	0.875	0.875	||||||||||	|| || ||||
2772	uaGGUGGGCGGAGUCGGAGGGUUUCAu	|||||| |||||||||||||||||	atCCACCCACCTCAGCCTCCCAAAGTg	>hsa_piR_022437|gb|DQ600690|Homo	NM_001256678.2	217	-55.99	2	26	5781	5807	24	0.9583	0.9583	||||||||||	|| |||||||
2773	uaGGUGGGCGGAGUCGGAGGGUUUCAu	|||||| |||||||||||||||||	atCCACCCACCTCAGCCTCCCAAAGTg	>hsa_piR_022437|gb|DQ600690|Homo	NM_001256679.2	217	-55.99	2	26	5276	5302	24	0.9583	0.9583	||||||||||	|| |||||||
2774	uaGGUGGGCGGAGUCGGAGGGUUUCAu	|||||| |||||||||||||||||	atCCACCCACCTCAGCCTCCCAAAGTg	>hsa_piR_022437|gb|DQ600690|Homo	NM_001256680.2	217	-55.99	2	26	4824	4850	24	0.9583	0.9583	||||||||||	|| |||||||
2775	uaGGUGGGCGGAGUCGGAGGGUUUCAu	||:||:||||||||||||||||||	atCCGCCTGCCTCAGCCTCCCAAAGTg	>hsa_piR_022437|gb|DQ600690|Homo	NM_001256702.1	217	-58.56	2	26	2994	3020	24	0.9167	1	||||||||||	|:||||||||
2776	uaGGUGGGCGGAGUCGGAGGGUUUCAu	|||||| |||||||||||||||||	atCCACCCACCTCAGCCTCCCAAAGTa	>hsa_piR_022437|gb|DQ600690|Homo	NM_001256720.2	217	-56.09	2	26	1482	1508	24	0.9583	0.9583	||||||||||	|| |||||||
2777	uaGGUGGGCGGAGUCGGAGGGUUUCAu	|::|||||||||||||||||||||	atCTGCCCGCCTCAGCCTCCCAAAGTg	>hsa_piR_022437|gb|DQ600690|Homo	NM_001256732.2	217	-56.67	2	26	5824	5850	24	0.9167	1	||||||||||	||||||||||
2778	uaGGUGGGCGGAGUCGGAGGGUUUCAu	||||||||||::||||||||||||	atCCACCCGCCTTGGCCTCCCAAAGTg	>hsa_piR_022437|gb|DQ600690|Homo	NM_001256732.2	217	-56.9	2	26	6134	6160	24	0.9167	1	||||||||||	||||||::||
2779	uaGGUGGGCGGAGUCGGAGGGUUUCAu	|::|||||||||||||||||||||	atCTGCCCGCCTCAGCCTCCCAAAGTg	>hsa_piR_022437|gb|DQ600690|Homo	NM_001256733.2	217	-56.67	2	26	5740	5766	24	0.9167	1	||||||||||	||||||||||
2780	uaGGUGGGCGGAGUCGGAGGGUUUCAu	||||||||||::||||||||||||	atCCACCCGCCTTGGCCTCCCAAAGTg	>hsa_piR_022437|gb|DQ600690|Homo	NM_001256733.2	217	-56.9	2	26	6050	6076	24	0.9167	1	||||||||||	||||||::||
2781	uaGGUGGGCGGAGUCGGAGGGUUUCAu	|::|||||||||||||||||||||	atCTGCCCGCCTCAGCCTCCCAAAGTg	>hsa_piR_022437|gb|DQ600690|Homo	NM_001256734.2	217	-56.67	2	26	5734	5760	24	0.9167	1	||||||||||	||||||||||
2782	uaGGUGGGCGGAGUCGGAGGGUUUCAu	||||||||||::||||||||||||	atCCACCCGCCTTGGCCTCCCAAAGTg	>hsa_piR_022437|gb|DQ600690|Homo	NM_001256734.2	217	-56.9	2	26	6044	6070	24	0.9167	1	||||||||||	||||||::||
2783	uaGGUGGGCGGAGUCGGAGGGUUUCAu	|::|||||||||||||||||||||	atCTGCCCGCCTCAGCCTCCCAAAGTg	>hsa_piR_022437|gb|DQ600690|Homo	NM_001256735.2	217	-56.67	2	26	5710	5736	24	0.9167	1	||||||||||	||||||||||
2784	uaGGUGGGCGGAGUCGGAGGGUUUCAu	||||||||||::||||||||||||	atCCACCCGCCTTGGCCTCCCAAAGTg	>hsa_piR_022437|gb|DQ600690|Homo	NM_001256735.2	217	-56.9	2	26	6020	6046	24	0.9167	1	||||||||||	||||||::||
2785	uaGGUGGGCGGAGUCGGAGGGUUUCAu	|::|||||||||||||||||||||	atCTGCCCGCCTCAGCCTCCCAAAGTg	>hsa_piR_022437|gb|DQ600690|Homo	NM_001256736.2	217	-56.67	2	26	5611	5637	24	0.9167	1	||||||||||	||||||||||
2786	uaGGUGGGCGGAGUCGGAGGGUUUCAu	||||||||||::||||||||||||	atCCACCCGCCTTGGCCTCCCAAAGTg	>hsa_piR_022437|gb|DQ600690|Homo	NM_001256736.2	217	-56.9	2	26	5921	5947	24	0.9167	1	||||||||||	||||||::||
2787	uaGGUGGGCGGAGUCGGAGGGUUUCAu	|::||:||||||||||||||||||	atCTGCCTGCCTCAGCCTCCCAAAGTg	>hsa_piR_022437|gb|DQ600690|Homo	NM_001256824.2	213	-53.87	2	26	467	493	24	0.875	1	||||||||||	|:||||||||
2788	uaGGUGGGCGGAGUCGGAGGGUUUCAu	||||||||||||||||||||||||	atCCACCCGCCTCAGCCTCCCAAAGTg	>hsa_piR_022437|gb|DQ600690|Homo	NM_001256838.2	225	-61.83	2	26	4769	4795	24	1	1	||||||||||	||||||||||
2789	uaGGUGGGCGGAGUCGGAGGGUUUCAu	|::||:|||||:||||||||||||	atCTGCCTGCCTCGGCCTCCCAAAGTg	>hsa_piR_022437|gb|DQ600690|Homo	NM_001256838.2	209	-53.22	2	26	3397	3423	24	0.8333	1	||||||||||	|:|||||:||
2790	uaGGUGGGCGGAGUCGGAGGGUUUCAu	||:||| ||||: |||||||||||	atCCGCCCACCTCGACCTCCCAAAGTg	>hsa_piR_022437|gb|DQ600690|Homo	NM_001256838.2	201	-49.57	2	26	7474	7500	24	0.8333	0.9167	||||||||||	|| ||||: |
2791	uaGGUGGGCGGAGUCGGAGGGUUUCAu	|| ||||||||:||||||||||||	atCCTCCCGCCTCGGCCTCCCAAAGTg	>hsa_piR_022437|gb|DQ600690|Homo	NM_001257160.2	213	-56.79	2	26	1603	1629	24	0.9167	0.9583	||||||||||	|||||||:||
2792	uaGGUGGGCGGAGUCGGAGGGUUUCAu	|| :|| ||||||:||||||||||	atCCTTCCACCTCAGTCTCCCAAAGTg	>hsa_piR_022437|gb|DQ600690|Homo	NM_001257160.2	201	-46.78	2	26	1742	1768	24	0.8333	0.9167	||||||||||	|| ||||||:
2793	uaGGUGGGCGGAGUCGGAGGGUUUCAu	||:|||||||::||||||||||||	atCCGCCCGCCTTGGCCTCCCAAAGTg	>hsa_piR_022437|gb|DQ600690|Homo	NM_001257273.2	213	-56.43	2	26	6195	6221	24	0.875	1	||||||||||	||||||::||
2794	uaGGUGGGCGGAGUCGGAGGGUUUCAu	|||||: |||::||||||||||||	atCCACCTACCTTGGCCTCCCAAAGTg	>hsa_piR_022437|gb|DQ600690|Homo	NM_001257273.2	205	-48.11	2	26	7728	7754	24	0.8333	0.9583	||||||||||	|: |||::||
2795	uaGGUGGGCGGAGUCGGAGGGUUUCAu	||||||||||| ||||||||||||	atCCACCCGCCTCTGCCTCCCAAAGTg	>hsa_piR_022437|gb|DQ600690|Homo	NM_001257291.2	217	-57.49	2	26	5605	5631	24	0.9583	0.9583	||||||||||	||||||| ||
2796	uaGGUGGGCGGAGUCGGAGGGUUUCAu	|||||: |||::||||||||||||	atCCACCTCCCTTGGCCTCCCAAAGTg	>hsa_piR_022437|gb|DQ600690|Homo	NM_001257291.2	205	-47.73	2	26	3288	3314	24	0.8333	0.9583	||||||||||	|: |||::||
2797	uaGGUGGGCGGAGUCGGAGGGUUUCAu	||||:: ||||:||||||||||||	atCCACTTACCTCGGCCTCCCAAAGTg	>hsa_piR_022437|gb|DQ600690|Homo	NM_001257334.2	205	-49.28	2	26	3781	3807	24	0.8333	0.9583	||||||||||	:: ||||:||
2798	uaGGUGGGCGGAGUCGGAGGGUUUCAu	|| ||:||||::|:||||||||||	atCCTCCTGCCTTGGTCTCCCAAAGTg	>hsa_piR_022437|gb|DQ600690|Homo	NM_001257334.2	201	-47.42	2	26	2725	2751	24	0.7917	0.9583	||||||||||	|:||||::|:
2799	uaggUGGGCGGAGUCGGAGGGUUUCAu	::|| | |:||||||||||||	ggtgGTCCAC--CGGCCTCCCAAAGTa	>hsa_piR_022437|gb|DQ600690|Homo	NM_001257334.2	172	-36.18	2	24	4496	4520	22	0.7273	0.8636	||||||||||	|| | |:||
2800	uaGGUGGGCGGAGUCGGAGGGUUUCAu	||:||||||||:||||||||||||	atCCGCCCGCCTCGGCCTCCCAAAGTg	>hsa_piR_022437|gb|DQ600690|Homo	NM_001257399.2	217	-60.71	2	26	100	126	24	0.9167	1	||||||||||	|||||||:||
2801	uaGGUGGGCGGAGUCGGAGGGUUUCAu	|::||| |||||||||||||||||	atCTGCCCACCTCAGCCTCCCAAAGTg	>hsa_piR_022437|gb|DQ600690|Homo	NM_001257408.2	209	-50.83	2	26	6475	6501	24	0.875	0.9583	||||||||||	|| |||||||
2802	uaGGUGGGCGGAGUCGGAGGGUUUCAu	|::||| |||||||||||||||||	atCTGCCCACCTCAGCCTCCCAAAGTg	>hsa_piR_022437|gb|DQ600690|Homo	NM_001257408.2	209	-50.83	2	26	8210	8236	24	0.875	0.9583	||||||||||	|| |||||||
2803	uaGGUGGGCGGAGUCGGAGGGUUUCAu	|::||| |||||||||||||||||	atCTGCCCACCTCAGCCTCCCAAAGTg	>hsa_piR_022437|gb|DQ600690|Homo	NM_001257409.2	209	-50.83	2	26	6358	6384	24	0.875	0.9583	||||||||||	|| |||||||
2804	uaGGUGGGCGGAGUCGGAGGGUUUCAu	|::||| |||||||||||||||||	atCTGCCCACCTCAGCCTCCCAAAGTg	>hsa_piR_022437|gb|DQ600690|Homo	NM_001257409.2	209	-50.83	2	26	8093	8119	24	0.875	0.9583	||||||||||	|| |||||||
2805	uaGGUGGGCGGAGUCGGAGGGUUUCAu	|::||| |||||||||||||||||	atCTGCCCACCTCAGCCTCCCAAAGTg	>hsa_piR_022437|gb|DQ600690|Homo	NM_001257410.2	209	-50.83	2	26	6316	6342	24	0.875	0.9583	||||||||||	|| |||||||
2806	uaGGUGGGCGGAGUCGGAGGGUUUCAu	|::||| |||||||||||||||||	atCTGCCCACCTCAGCCTCCCAAAGTg	>hsa_piR_022437|gb|DQ600690|Homo	NM_001257410.2	209	-50.83	2	26	8051	8077	24	0.875	0.9583	||||||||||	|| |||||||
2807	uaGGUGGGCGGAGUCGGAGGGUUUCAu	|::||| |||||||||||||||||	atCTGCCCACCTCAGCCTCCCAAAGTg	>hsa_piR_022437|gb|DQ600690|Homo	NM_001257411.2	209	-50.83	2	26	6148	6174	24	0.875	0.9583	||||||||||	|| |||||||
2808	uaGGUGGGCGGAGUCGGAGGGUUUCAu	|::||| |||||||||||||||||	atCTGCCCACCTCAGCCTCCCAAAGTg	>hsa_piR_022437|gb|DQ600690|Homo	NM_001257411.2	209	-50.83	2	26	7883	7909	24	0.875	0.9583	||||||||||	|| |||||||
2809	uaGGUGGGCGGAGUCGGAGGGUUUCAu	|::||| |||||||||||||||||	atCTGCCCACCTCAGCCTCCCAAAGTg	>hsa_piR_022437|gb|DQ600690|Homo	NM_001257412.2	209	-50.83	2	26	6031	6057	24	0.875	0.9583	||||||||||	|| |||||||
2810	uaGGUGGGCGGAGUCGGAGGGUUUCAu	|::||| |||||||||||||||||	atCTGCCCACCTCAGCCTCCCAAAGTg	>hsa_piR_022437|gb|DQ600690|Homo	NM_001257412.2	209	-50.83	2	26	7766	7792	24	0.875	0.9583	||||||||||	|| |||||||
2811	uaGGUGGGCGGAGUCGGAGGGUUUCAu	|::||| |||||||||||||||||	atCTGCCCACCTCAGCCTCCCAAAGTg	>hsa_piR_022437|gb|DQ600690|Homo	NM_001257413.2	209	-50.83	2	26	5914	5940	24	0.875	0.9583	||||||||||	|| |||||||
2812	uaGGUGGGCGGAGUCGGAGGGUUUCAu	|::||| |||||||||||||||||	atCTGCCCACCTCAGCCTCCCAAAGTg	>hsa_piR_022437|gb|DQ600690|Homo	NM_001257413.2	209	-50.83	2	26	7649	7675	24	0.875	0.9583	||||||||||	|| |||||||
2813	uaGGUGGGCGGAGUCGGAGGGUUUCAu	|::||| |||||||||||||||||	atCTGCCCACCTCAGCCTCCCAAAGTg	>hsa_piR_022437|gb|DQ600690|Homo	NM_001257414.2	209	-50.83	2	26	6175	6201	24	0.875	0.9583	||||||||||	|| |||||||
2814	uaGGUGGGCGGAGUCGGAGGGUUUCAu	|::||| |||||||||||||||||	atCTGCCCACCTCAGCCTCCCAAAGTg	>hsa_piR_022437|gb|DQ600690|Homo	NM_001257414.2	209	-50.83	2	26	7910	7936	24	0.875	0.9583	||||||||||	|| |||||||
2815	uaGGUGGGCGGAGUCGGAGGGUUUCAu	||:||:||||||||||||||||||	atCCGCCTGCCTCAGCCTCCCAAAGTg	>hsa_piR_022437|gb|DQ600690|Homo	NM_001258280.2	217	-58.56	2	26	2876	2902	24	0.9167	1	||||||||||	|:||||||||
2816	uaGGUGGGCGGAGUCGGAGGGUUUCAu	||:|||||||::||||||||||||	atCCGCCCGCCTTGGCCTCCCAAAGTg	>hsa_piR_022437|gb|DQ600690|Homo	NM_001258316.1	213	-56.43	2	26	391	417	24	0.875	1	||||||||||	||||||::||
2817	uaGGUGGGCGGAGUCGGAGGGUUUCAu	|| |||||||||||||||||||||	atCCTCCCGCCTCAGCCTCCCAAAGTg	>hsa_piR_022437|gb|DQ600690|Homo	NM_001258328.3	217	-57.44	2	26	4615	4641	24	0.9583	0.9583	||||||||||	||||||||||
2818	uaGGUGGGCGGAGUCGGAGGGUUUCAu	||:||| ||||:||||||||||||	atCCGCCCACCTCGGCCTCCCAAAGTg	>hsa_piR_022437|gb|DQ600690|Homo	NM_001258328.3	209	-54.87	2	26	4912	4938	24	0.875	0.9583	||||||||||	|| ||||:||
2819	uaGGUGGGCGGAGUCGGAGGGUUUCAu	|||||| ||||:||||||||||||	atCCACCCACCTCGGCCTCCCAAAGTg	>hsa_piR_022437|gb|DQ600690|Homo	NM_001258392.3	213	-55.34	2	26	4736	4762	24	0.9167	0.9583	||||||||||	|| ||||:||
2820	uaGGUGGGCGGAGUCGGAGGGUUUCAu	|::||:|||||:||||||||||||	atCTGCCTGCCTCGGCCTCCCAAAGTg	>hsa_piR_022437|gb|DQ600690|Homo	NM_001258392.3	209	-53.22	2	26	3636	3662	24	0.8333	1	||||||||||	|:|||||:||
2821	uaGGUGGGCGGAGUCGGAGGGUUUCAu	|||||| ||||:||||||||||||	atCCACCCACCTCGGCCTCCCAAAGTg	>hsa_piR_022437|gb|DQ600690|Homo	NM_001258393.3	213	-55.34	2	26	4649	4675	24	0.9167	0.9583	||||||||||	|| ||||:||
2822	uaGGUGGGCGGAGUCGGAGGGUUUCAu	|::||:|||||:||||||||||||	atCTGCCTGCCTCGGCCTCCCAAAGTg	>hsa_piR_022437|gb|DQ600690|Homo	NM_001258393.3	209	-53.22	2	26	3549	3575	24	0.8333	1	||||||||||	|:|||||:||
2823	uaGGUGGGCGGAGUCGGAGGGUUUCAu	|||||| |||||||||||||||||	atCCACCCACCTCAGCCTCCCAAAGTg	>hsa_piR_022437|gb|DQ600690|Homo	NM_001258401.2	217	-55.99	2	26	7596	7622	24	0.9583	0.9583	||||||||||	|| |||||||
2824	uaGGUGGGCGGAGUCGGAGGGUUUCAu	||||||||||::||||||||||||	atCCACCCGCCTTGGCCTCCCAAAGTg	>hsa_piR_022437|gb|DQ600690|Homo	NM_001258401.2	217	-56.9	2	26	9660	9686	24	0.9167	1	||||||||||	||||||::||
2825	uaGGUGGGCGGAGUCGGAGGGUUUCAu	|||||| |||||||||||||||||	atCCACCCACCTCAGCCTCCCAAAGTg	>hsa_piR_022437|gb|DQ600690|Homo	NM_001261430.2	217	-55.99	2	26	1337	1363	24	0.9583	0.9583	||||||||||	|| |||||||
2826	uaGGUGGGCGGAGUCGGAGGGUUUCAu	||||||||||||||||||||||||	atCCACCCGCCTCAGCCTCCCAAAGTg	>hsa_piR_022437|gb|DQ600690|Homo	NM_001261443.1	225	-61.83	2	26	4080	4106	24	1	1	||||||||||	||||||||||
2827	uaGGUGGGCGGAGUCGGAGGGUUUCAu	||||||||||||||||||||||||	atCCACCCGCCTCAGCCTCCCAAAGTg	>hsa_piR_022437|gb|DQ600690|Homo	NM_001261444.2	225	-61.83	2	26	3483	3509	24	1	1	||||||||||	||||||||||
2828	uaGGUGGGCGGAGUCGGAGGGUUUCAu	|||||||||||:||||||||||||	atCCACCCGCCTCGGCCTCCCAAAGTg	>hsa_piR_022437|gb|DQ600690|Homo	NM_001264573.2	221	-61.18	2	26	3833	3859	24	0.9583	1	||||||||||	|||||||:||
2829	uaGGUGGGCGGAGUCGGAGGGUUUCAu	|||||||||||:||||||||||||	atCCACCCGCCTCGGCCTCCCAAAGTg	>hsa_piR_022437|gb|DQ600690|Homo	NM_001265577.2	221	-61.18	2	26	3570	3596	24	0.9583	1	||||||||||	|||||||:||
2830	uaGGUGGGCGGAGUCGGAGGGUUUCAu	|||||| ||||:||||||||||||	atCCACCCACCTCGGCCTCCCAAAGTg	>hsa_piR_022437|gb|DQ600690|Homo	NM_001267048.2	213	-55.34	2	26	6092	6118	24	0.9167	0.9583	||||||||||	|| ||||:||
2831	uaGGUGGGCGGAGUCGGAGGGUUUCAu	|| ||:|||||:||||||||||||	atCCTCCTGCCTCGGCCTCCCAAAGTg	>hsa_piR_022437|gb|DQ600690|Homo	NM_001267718.2	209	-53.99	2	26	1469	1495	24	0.875	0.9583	||||||||||	|:|||||:||
2832	uaGGUGGGCGGAGUCGGAGGGUUUCAu	||:||| ||||:||||||||||||	acCCGCCCACCTCGGCCTCCCAAAGTg	>hsa_piR_022437|gb|DQ600690|Homo	NM_001267779.1	209	-52.75	2	26	6205	6231	24	0.875	0.9583	||||||||||	|| ||||:||
2833	uaGGUGGGCGGAGUCGGAGGGUUUCAu	|| ||: ||||:||||||||||||	atCCCCCTACCTCGGCCTCCCAAAGTg	>hsa_piR_022437|gb|DQ600690|Homo	NM_001267779.1	201	-48.24	2	26	4172	4198	24	0.8333	0.9167	||||||||||	|: ||||:||
2834	uaGGUGGGCGGAGUCGGAGGGUUUCAu	|:: |:|||||:||||||||||||	atCTGACTGCCTCGGCCTCCCAAAGTg	>hsa_piR_022437|gb|DQ600690|Homo	NM_001267779.1	201	-48.23	2	26	7144	7170	24	0.7917	0.9583	||||||||||	|:|||||:||
2835	uaGGUGGGCGGAGUCGGAGGGUUUCAu	|::||| ||||:||||||||||||	atCTGCCCACCTCGGCCTCCCAAAGTg	>hsa_piR_022437|gb|DQ600690|Homo	NM_001267782.2	205	-50.18	2	26	2337	2363	24	0.8333	0.9583	||||||||||	|| ||||:||
2836	uaGGUGGGCGGAGUCGGAGGGUUUCAu	|||||:||||::||||||||||||	atCCACCTGCCTTGGCCTCCCAAAGTg	>hsa_piR_022437|gb|DQ600690|Homo	NM_001267803.2	213	-54.1	2	26	2867	2893	24	0.875	1	||||||||||	|:||||::||
2837	uaGGUGGGCGGAGUCGGAGGGUUUCAu	|||||:||||::||||||||||||	atCCACCTGCCTTGGCCTCCCAAAGTg	>hsa_piR_022437|gb|DQ600690|Homo	NM_001267804.2	213	-54.1	2	26	2858	2884	24	0.875	1	||||||||||	|:||||::||
2838	uaGGUGGGCGGAGUCGGAGGGUUUCAu	|||||:||||::||||||||||||	atCCACCTGCCTTGGCCTCCCAAAGTg	>hsa_piR_022437|gb|DQ600690|Homo	NM_001267805.2	213	-54.1	2	26	2854	2880	24	0.875	1	||||||||||	|:||||::||
2839	uaGGUGGGCGGAGUCGGAGGGUUUCAu	||:||:||||::||||||||||||	atCCGCCTGCCTTGGCCTCCCAAAGTg	>hsa_piR_022437|gb|DQ600690|Homo	NM_001268284.2	209	-53.63	2	26	152	178	24	0.8333	1	||||||||||	|:||||::||
2840	uaGGUGGGCGGAGUCGGAGGGUUUCAu	|::||||||||:||||||||||||	atCTGCCCGCCTCGGCCTCCCAAAGTg	>hsa_piR_022437|gb|DQ600690|Homo	NM_001269044.1	213	-56.02	2	26	2670	2696	24	0.875	1	||||||||||	|||||||:||
2841	uaGGUGGGCGGAGUCGGAGGGUUUCAu	|::||||||||:||||||||||||	atCTGCCCGCCTCGGCCTCCCAAAGTg	>hsa_piR_022437|gb|DQ600690|Homo	NM_001269049.1	213	-56.02	2	26	1565	1591	24	0.875	1	||||||||||	|||||||:||
2842	uaGGUGGGCGGAGUCGGAGGGUUUCAu	|::||||||||:||||||||||||	atCTGCCCGCCTCGGCCTCCCAAAGTg	>hsa_piR_022437|gb|DQ600690|Homo	NM_001269054.1	213	-56.02	2	26	1354	1380	24	0.875	1	||||||||||	|||||||:||
2843	uaGGUGGGCGGAGUCGGAGGGUUUCAu	||:||||||||:||||||||||||	atCCGCCCGCCTCGGCCTCCCAAAGTg	>hsa_piR_022437|gb|DQ600690|Homo	NM_001270393.1	217	-60.71	2	26	267	293	24	0.9167	1	||||||||||	|||||||:||
2844	uaGGUGGGCGGAGUCGGAGGGUUUCAu	|| ||:||||||||||||||||||	atCCTCCTGCCTCAGCCTCCCAAAGTg	>hsa_piR_022437|gb|DQ600690|Homo	NM_001270397.2	213	-54.64	2	26	3823	3849	24	0.9167	0.9583	||||||||||	|:||||||||
2845	uaGGUGGGCGGAGUCGGAGGGUUUCAu	|||||| | |||||||||||||||	atCCACCCCCATCAGCCTCCCAAAGTg	>hsa_piR_022437|gb|DQ600690|Homo	NM_001270407.1	209	-51.7	2	26	2892	2918	24	0.9167	0.9167	||||||||||	|| | |||||
2846	uaGGUGGGCGGAGUCGGAGGGUUUCAu	||:||| ||||:||||||||||||	atCCGCCCACCTCGGCCTCCCAAAGTg	>hsa_piR_022437|gb|DQ600690|Homo	NM_001270439.2	209	-54.87	2	26	3835	3861	24	0.875	0.9583	||||||||||	|| ||||:||
2847	uaGGUGGGCGGAGUCGGAGGGUUUCAu	||:||| ||||:||||||||||||	atCCGCCCACCTCGGCCTCCCAAAGTg	>hsa_piR_022437|gb|DQ600690|Homo	NM_001270440.1	209	-54.87	2	26	1083	1109	24	0.875	0.9583	||||||||||	|| ||||:||
2848	uaGGUGGGCGGAGUCGGAGGGUUUCAu	|||||| |||| ||||||||||||	atCCACCCACCTCTGCCTCCCAAAGTg	>hsa_piR_022437|gb|DQ600690|Homo	NM_001270526.2	209	-51.65	2	26	1526	1552	24	0.9167	0.9167	||||||||||	|| |||| ||
2849	uaGGUGGGCGGAGUCGGAGGGUUUCAu	:|||:|||||| ||||||||||||	atTCACTCGCCTCTGCCTCCCAAAGTg	>hsa_piR_022437|gb|DQ600690|Homo	NM_001270622.2	209	-51.59	2	26	5993	6019	24	0.875	0.9583	||||||||||	:|||||| ||
2850	uaGGUGGGCGGAGUCGGAGGGUUUCAu	:|||:|||||| ||||||||||||	atTCACTCGCCTCTGCCTCCCAAAGTg	>hsa_piR_022437|gb|DQ600690|Homo	NM_001270623.2	209	-51.59	2	26	6013	6039	24	0.875	0.9583	||||||||||	:|||||| ||
2851	uaGGUGGGCGGAGUCGGAGGGUUUCAu	||::|| |||::| ||||||||||	atCCGTCCTCCTTGGGCTCCCAAAGTg	>hsa_piR_022437|gb|DQ600690|Homo	NM_001270660.2	193	-42.69	2	26	5066	5092	24	0.75	0.9167	||||||||||	|| |||::|
2852	uaGGUGGGCGGAGUCGGAGGGUUUCAu	||::|| |||::| ||||||||||	atCCGTCCTCCTTGGGCTCCCAAAGTg	>hsa_piR_022437|gb|DQ600690|Homo	NM_001270661.2	193	-42.69	2	26	4895	4921	24	0.75	0.9167	||||||||||	|| |||::|
2853	uaGGUGGGCGGAGUCGGAGGGUUUCAu	|:|||:||||||||||||||||||	atCTACCTGCCTCAGCCTCCCAAAGTg	>hsa_piR_022437|gb|DQ600690|Homo	NM_001270679.1	217	-56.32	2	26	575	601	24	0.9167	1	||||||||||	|:||||||||
2854	uaGGUGGGCGGAGUCGGAGGGUUUCAu	|||||:||||||||||||||||||	atCCACCTGCCTCAGCCTCCCAAAGTg	>hsa_piR_022437|gb|DQ600690|Homo	NM_001270875.3	221	-59.03	2	26	3890	3916	24	0.9583	1	||||||||||	|:||||||||
2855	uaGGUGGGCGGAGUCGGAGGGUUUCAu	|||||| |||||||||||||||||	atCCACCCACCTCAGCCTCCCAAAGTg	>hsa_piR_022437|gb|DQ600690|Homo	NM_001270875.3	217	-55.99	2	26	3412	3438	24	0.9583	0.9583	||||||||||	|| |||||||
2856	uaGGUGGGCGGAGUCGGAGGGUUUCAu	|| :|:||||::||||||||||||	gtCCTTCTGCCTTGGCCTCCCAAAGTg	>hsa_piR_022437|gb|DQ600690|Homo	NM_001270875.3	201	-46.87	2	26	3228	3254	24	0.7917	0.9583	||||||||||	|:||||::||
2857	uaGGUGGGCGGAGUCGGAGGGUUUCAu	|||||:||||||||||||||||||	atCCACCTGCCTCAGCCTCCCAAAGTg	>hsa_piR_022437|gb|DQ600690|Homo	NM_001270876.2	221	-59.03	2	26	3563	3589	24	0.9583	1	||||||||||	|:||||||||
2858	uaGGUGGGCGGAGUCGGAGGGUUUCAu	|||||| |||||||||||||||||	atCCACCCACCTCAGCCTCCCAAAGTg	>hsa_piR_022437|gb|DQ600690|Homo	NM_001270876.2	217	-55.99	2	26	3085	3111	24	0.9583	0.9583	||||||||||	|| |||||||
2859	uaGGUGGGCGGAGUCGGAGGGUUUCAu	|| :|:||||::||||||||||||	gtCCTTCTGCCTTGGCCTCCCAAAGTg	>hsa_piR_022437|gb|DQ600690|Homo	NM_001270876.2	201	-46.87	2	26	2901	2927	24	0.7917	0.9583	||||||||||	|:||||::||
2860	uaGGUGGGCGGAGUCGGAGGGUUUCAu	|::||:||||||||||||||||||	atCTGCCTGCCTCAGCCTCCCAAAGTg	>hsa_piR_022437|gb|DQ600690|Homo	NM_001270934.2	213	-53.87	2	26	5303	5329	24	0.875	1	||||||||||	|:||||||||
2861	uaGGUGGGCGGAGUCGGAGGGUUUCAu	|::||:||||||||||||||||||	atCTGCCTGCCTCAGCCTCCCAAAGTg	>hsa_piR_022437|gb|DQ600690|Homo	NM_001270941.2	213	-53.87	2	26	5366	5392	24	0.875	1	||||||||||	|:||||||||
2862	uaGGUGGGCGGAGUCGGAGGGUUUCAu	|| || |||||:||||||||||||	gtCCTCCAGCCTCGGCCTCCCAAAGTa	>hsa_piR_022437|gb|DQ600690|Homo	NM_001270949.1	205	-49.32	2	26	1825	1851	24	0.875	0.9167	||||||||||	| |||||:||
2863	uaGGUGGGCGGAGUCGGAGGGUUUCAu	|| || |||||:||||||||||||	gtCCTCCAGCCTCGGCCTCCCAAAGTa	>hsa_piR_022437|gb|DQ600690|Homo	NM_001270950.1	205	-49.32	2	26	1772	1798	24	0.875	0.9167	||||||||||	| |||||:||
2864	uaGGUGGGCGGAGUCGGAGGGUUUCAu	|| || |||||:||||||||||||	gtCCTCCAGCCTCGGCCTCCCAAAGTa	>hsa_piR_022437|gb|DQ600690|Homo	NM_001270951.2	205	-49.32	2	26	1635	1661	24	0.875	0.9167	||||||||||	| |||||:||
2865	uaGGUGGGCGGAGUCGGAGGGUUUCAu	|| ||| |||:|||||||||||||	atCCTCCCTCCTTAGCCTCCCAAAGTg	>hsa_piR_022437|gb|DQ600690|Homo	NM_001271427.2	205	-48.74	2	26	6147	6173	24	0.875	0.9167	||||||||||	|| |||:|||
2866	uaGGUGGGCGGAGUCGGAGGGUUUCAu	|::|: ||||::||||||||||||	atCTGCTGGCCTTGGCCTCCCAAAGTg	>hsa_piR_022437|gb|DQ600690|Homo	NM_001271427.2	197	-43.67	2	26	4971	4997	24	0.75	0.9583	||||||||||	: ||||::||
2867	uaGGUGGGCGGAGUCGGAGGGUUUCAu	|| ||| |||:|||||||||||||	atCCTCCCTCCTTAGCCTCCCAAAGTg	>hsa_piR_022437|gb|DQ600690|Homo	NM_001271428.2	205	-48.74	2	26	6147	6173	24	0.875	0.9167	||||||||||	|| |||:|||
2868	uaGGUGGGCGGAGUCGGAGGGUUUCAu	|::|: ||||::||||||||||||	atCTGCTGGCCTTGGCCTCCCAAAGTg	>hsa_piR_022437|gb|DQ600690|Homo	NM_001271428.2	197	-43.67	2	26	4971	4997	24	0.75	0.9583	||||||||||	: ||||::||
2869	uaGGUGGGCGGAGUCGGAGGGUUUCAu	|| ||| |||:|||||||||||||	atCCTCCCTCCTTAGCCTCCCAAAGTg	>hsa_piR_022437|gb|DQ600690|Homo	NM_001271429.2	205	-48.74	2	26	6084	6110	24	0.875	0.9167	||||||||||	|| |||:|||
2870	uaGGUGGGCGGAGUCGGAGGGUUUCAu	|::|: ||||::||||||||||||	atCTGCTGGCCTTGGCCTCCCAAAGTg	>hsa_piR_022437|gb|DQ600690|Homo	NM_001271429.2	197	-43.67	2	26	4908	4934	24	0.75	0.9583	||||||||||	: ||||::||
2871	uaGGUGGGCGGAGUCGGAGGGUUUCAu	|::||| |||||||||||||||||	atCTGCCCACCTCAGCCTCCCAAAGTg	>hsa_piR_022437|gb|DQ600690|Homo	NM_001271471.3	209	-50.83	2	26	1993	2019	24	0.875	0.9583	||||||||||	|| |||||||
2872	uaGGUGGGCGGAGUCGGAGGGUUUCAu	||::|:||:|::||||||||||||	atCCGTCTGCTTTGGCCTCCCAAAGTg	>hsa_piR_022437|gb|DQ600690|Homo	NM_001271471.3	201	-47.92	2	26	1858	1884	24	0.75	1	||||||||||	|:||:|::||
2873	uaGGUGGGCGGAGUCGGAGGGUUUCAu	|::||:|||||:||||||||||||	atCTGCCTGCCTCGGCCTCCCAAAGTg	>hsa_piR_022437|gb|DQ600690|Homo	NM_001271512.3	209	-53.22	2	26	3407	3433	24	0.8333	1	||||||||||	|:|||||:||
2874	uaGGUGGGCGGAGUCGGAGGGUUUCAu	||:||:||||::|:||||||||||	atCCGCCTGCCTTGGTCTCCCAAAGTg	>hsa_piR_022437|gb|DQ600690|Homo	NM_001271581.3	205	-51.34	2	26	15002	15028	24	0.7917	1	||||||||||	|:||||::|:
2875	uaGGUGGGCGGAGUCGGAGGGUUUCAu	|::||||||||:||||||||||||	atCTGCCCGCCTCGGCCTCCCAAAGTg	>hsa_piR_022437|gb|DQ600690|Homo	NM_001271634.2	213	-56.02	2	26	604	630	24	0.875	1	||||||||||	|||||||:||
2876	uaGGUGGGCGGAGUCGGAGGGUUUCAu	|:|||:||||||||||||||||||	atCTACCTGCCTCAGCCTCCCAAAGTg	>hsa_piR_022437|gb|DQ600690|Homo	NM_001271664.2	217	-56.32	2	26	3354	3380	24	0.9167	1	||||||||||	|:||||||||
2877	uaGGUGGGCGGAGUCGGAGGGUUUCAu	|||||||||||:||||||||||||	atCCACCCGCCTCGGCCTCCCAAAGTg	>hsa_piR_022437|gb|DQ600690|Homo	NM_001271684.2	221	-61.18	2	26	11218	11244	24	0.9583	1	||||||||||	|||||||:||
2878	uaGGUGGGCGGAGUCGGAGGGUUUCAu	||:||:|||||:||||||||||||	atCCGCCTGCCTCGGCCTCCCAAAGTg	>hsa_piR_022437|gb|DQ600690|Homo	NM_001271684.2	213	-57.91	2	26	6612	6638	24	0.875	1	||||||||||	|:|||||:||
2879	uaGGUGGGCGGAGUCGGAGGGUUUCAu	|::||:||||::||||||||||||	atCTGCCTGCCTTGGCCTCCCAAAGTg	>hsa_piR_022437|gb|DQ600690|Homo	NM_001271684.2	205	-48.94	2	26	7001	7027	24	0.7917	1	||||||||||	|:||||::||
2880	uaGGUGGGCGGAGUCGGAGGGUUUCAu	|::|| ||||::||||||||||||	atCTGCCGGCCTTGGCCTCCCAAAGTg	>hsa_piR_022437|gb|DQ600690|Homo	NM_001271684.2	201	-46.62	2	26	8104	8130	24	0.7917	0.9583	||||||||||	| ||||::||
2881	uaGGUGGGCGGAGUCGGAGGGUUUCAu	|||||||||||:||||||||||||	atCCACCCGCCTCGGCCTCCCAAAGTg	>hsa_piR_022437|gb|DQ600690|Homo	NM_001271685.2	221	-61.18	2	26	11432	11458	24	0.9583	1	||||||||||	|||||||:||
2882	uaGGUGGGCGGAGUCGGAGGGUUUCAu	||:||:|||||:||||||||||||	atCCGCCTGCCTCGGCCTCCCAAAGTg	>hsa_piR_022437|gb|DQ600690|Homo	NM_001271685.2	213	-57.91	2	26	6826	6852	24	0.875	1	||||||||||	|:|||||:||
2883	uaGGUGGGCGGAGUCGGAGGGUUUCAu	|::||:||||::||||||||||||	atCTGCCTGCCTTGGCCTCCCAAAGTg	>hsa_piR_022437|gb|DQ600690|Homo	NM_001271685.2	205	-48.94	2	26	7215	7241	24	0.7917	1	||||||||||	|:||||::||
2884	uaGGUGGGCGGAGUCGGAGGGUUUCAu	|::|| ||||::||||||||||||	atCTGCCGGCCTTGGCCTCCCAAAGTg	>hsa_piR_022437|gb|DQ600690|Homo	NM_001271685.2	201	-46.62	2	26	8318	8344	24	0.7917	0.9583	||||||||||	| ||||::||
2885	uaGGUGGGCGGAGUCGGAGGGUUUCAu	|::||||||||:||||||||||||	atCTGCCCGCCTCGGCCTCCCAAAGTg	>hsa_piR_022437|gb|DQ600690|Homo	NM_001271696.3	213	-56.02	2	26	3395	3421	24	0.875	1	||||||||||	|||||||:||
2886	uaGGUGGGCGGAGUCGGAGGGUUUCAu	||:||| |||::||||||||||||	atCCGCCCACCTTGGCCTCCCAAAGTt	>hsa_piR_022437|gb|DQ600690|Homo	NM_001271696.3	205	-49.18	2	26	3083	3109	24	0.8333	0.9583	||||||||||	|| |||::||
2887	uaGGUGGGCGGAGUCGGAGGGUUUCAu	|::||||||||:||||||||||||	atCTGCCCGCCTCGGCCTCCCAAAGTg	>hsa_piR_022437|gb|DQ600690|Homo	NM_001271697.3	213	-56.02	2	26	3275	3301	24	0.875	1	||||||||||	|||||||:||
2888	uaGGUGGGCGGAGUCGGAGGGUUUCAu	||:||| |||::||||||||||||	atCCGCCCACCTTGGCCTCCCAAAGTt	>hsa_piR_022437|gb|DQ600690|Homo	NM_001271697.3	205	-49.18	2	26	2963	2989	24	0.8333	0.9583	||||||||||	|| |||::||
2889	uaGGUGGGCGGAGUCGGAGGGUUUCAu	|::||||||||:||||||||||||	atCTGCCCGCCTCGGCCTCCCAAAGTg	>hsa_piR_022437|gb|DQ600690|Homo	NM_001271698.3	213	-56.02	2	26	3317	3343	24	0.875	1	||||||||||	|||||||:||
2890	uaGGUGGGCGGAGUCGGAGGGUUUCAu	||:||| |||::||||||||||||	atCCGCCCACCTTGGCCTCCCAAAGTt	>hsa_piR_022437|gb|DQ600690|Homo	NM_001271698.3	205	-49.18	2	26	3005	3031	24	0.8333	0.9583	||||||||||	|| |||::||
2891	uaGGUGGGCGGAGUCGGAGGGUUUCAu	|::||||||||:||||||||||||	atCTGCCCGCCTCGGCCTCCCAAAGTg	>hsa_piR_022437|gb|DQ600690|Homo	NM_001271699.3	213	-56.02	2	26	3278	3304	24	0.875	1	||||||||||	|||||||:||
2892	uaGGUGGGCGGAGUCGGAGGGUUUCAu	||:||| |||::||||||||||||	atCCGCCCACCTTGGCCTCCCAAAGTt	>hsa_piR_022437|gb|DQ600690|Homo	NM_001271699.3	205	-49.18	2	26	2966	2992	24	0.8333	0.9583	||||||||||	|| |||::||
2893	uaGGUGGGCGGAGUCGGAGGGUUUCAu	||||||||||||||||||||||||	atCCACCCGCCTCAGCCTCCCAAAGTg	>hsa_piR_022437|gb|DQ600690|Homo	NM_001271749.2	225	-61.83	2	26	2011	2037	24	1	1	||||||||||	||||||||||
2894	uaGGUGGGCGGAGUCGGAGGGUUUCAu	|||||||||||:||||||||||||	atCCACCCGCCTCGGCCTCCCAAAGTg	>hsa_piR_022437|gb|DQ600690|Homo	NM_001271749.2	221	-61.18	2	26	5003	5029	24	0.9583	1	||||||||||	|||||||:||
2895	uaGGUGGGCGGAGUCGGAGGGUUUCAu	|||||| |||::||||||||||||	atCCACCCACCTTGGCCTCCCAAAGTg	>hsa_piR_022437|gb|DQ600690|Homo	NM_001271749.2	209	-51.06	2	26	4403	4429	24	0.875	0.9583	||||||||||	|| |||::||
2896	uaGGUGGGCGGAGUCGGAGGGUUUCAu	|::||| ||||:||||||||||||	atCTGCCCACCTCGGCCTCCCAAAGTg	>hsa_piR_022437|gb|DQ600690|Homo	NM_001271749.2	205	-50.18	2	26	5519	5545	24	0.8333	0.9583	||||||||||	|| ||||:||
2897	uaGGUGGGCGGAGUCGGAGGGUUUCAu	|||||:|:||::||||||||||||	atCCACCTGTCTTGGCCTCCCAAAGTg	>hsa_piR_022437|gb|DQ600690|Homo	NM_001271750.1	209	-51.81	2	26	88	114	24	0.8333	1	||||||||||	|:|:||::||
2898	uaGGUGGGCGGAGUCGGAGGGUUUCAu	||:||:||||||||||||||||||	atCCGCCTGCCTCAGCCTCCCAAAGTg	>hsa_piR_022437|gb|DQ600690|Homo	NM_001271818.1	217	-58.56	2	26	7203	7229	24	0.9167	1	||||||||||	|:||||||||
2899	uaGGUGGGCGGAGUCGGAGGGUUUCAu	|| ||:||||||||||||||||||	atCCTCCTGCCTCAGCCTCCCAAAGTg	>hsa_piR_022437|gb|DQ600690|Homo	NM_001271818.1	213	-54.64	2	26	7958	7984	24	0.9167	0.9583	||||||||||	|:||||||||
2900	uaGGUGGGCGGAGUCGGAGGGUUUCAu	|::||| ||||:||||||||||||	atCTGCCCACCTCGGCCTCCCAAAGTg	>hsa_piR_022437|gb|DQ600690|Homo	NM_001271818.1	205	-50.18	2	26	6358	6384	24	0.8333	0.9583	||||||||||	|| ||||:||
2901	uaGGUGGGCGGAGUCGGAGGGUUUCAu	|| ||:||||::||||||||||||	acCCTCCTGCCTTGGCCTCCCAAAGTg	>hsa_piR_022437|gb|DQ600690|Homo	NM_001271818.1	205	-47.59	2	26	6671	6697	24	0.8333	0.9583	||||||||||	|:||||::||
2902	uaGGUGGGCGGAGUCGGAGGGUUUCAu	||:||:||||||||||||||||||	atCCGCCTGCCTCAGCCTCCCAAAGTg	>hsa_piR_022437|gb|DQ600690|Homo	NM_001271819.2	217	-58.56	2	26	6897	6923	24	0.9167	1	||||||||||	|:||||||||
2903	uaGGUGGGCGGAGUCGGAGGGUUUCAu	|| ||:||||||||||||||||||	atCCTCCTGCCTCAGCCTCCCAAAGTg	>hsa_piR_022437|gb|DQ600690|Homo	NM_001271819.2	213	-54.64	2	26	7652	7678	24	0.9167	0.9583	||||||||||	|:||||||||
2904	uaGGUGGGCGGAGUCGGAGGGUUUCAu	|::||| ||||:||||||||||||	atCTGCCCACCTCGGCCTCCCAAAGTg	>hsa_piR_022437|gb|DQ600690|Homo	NM_001271819.2	205	-50.18	2	26	6052	6078	24	0.8333	0.9583	||||||||||	|| ||||:||
2905	uaGGUGGGCGGAGUCGGAGGGUUUCAu	|| ||:||||::||||||||||||	acCCTCCTGCCTTGGCCTCCCAAAGTg	>hsa_piR_022437|gb|DQ600690|Homo	NM_001271819.2	205	-47.59	2	26	6365	6391	24	0.8333	0.9583	||||||||||	|:||||::||
2906	uaGGUGGGCGGAGUCGGAGGGUUUCAu	|::|||||||::||||||||||||	atCTGCCCGCCTTGGCCTCCCAAAGTg	>hsa_piR_022437|gb|DQ600690|Homo	NM_001271835.1	209	-51.74	2	26	3796	3822	24	0.8333	1	||||||||||	||||||::||
2907	uaGGUGGGCGGAGUCGGAGGGUUUCAu	|::|||||||::||||||||||||	atCTGCCCGCCTTGGCCTCCCAAAGTg	>hsa_piR_022437|gb|DQ600690|Homo	NM_001271836.2	209	-51.74	2	26	4008	4034	24	0.8333	1	||||||||||	||||||::||
2908	uaGGUGGGCGGAGUCGGAGGGUUUCAu	|||||:||||||||||||||||||	atCCACCTGCCTCAGCCTCCCAAAGTg	>hsa_piR_022437|gb|DQ600690|Homo	NM_001271837.2	221	-59.03	2	26	4737	4763	24	0.9583	1	||||||||||	|:||||||||
2909	uaGGUGGGCGGAGUCGGAGGGUUUCAu	|||||:|||||:||||||||||||	atCCACCTGCCTCGGCCTCCCAAAGTg	>hsa_piR_022437|gb|DQ600690|Homo	NM_001271837.2	217	-58.38	2	26	5052	5078	24	0.9167	1	||||||||||	|:|||||:||
2910	uaGGUGGGCGGAGUCGGAGGGUUUCAu	||:|||||||::||||||||||||	atCCGCCCGCCTTGGCCTCCCAAAGTg	>hsa_piR_022437|gb|DQ600690|Homo	NM_001271837.2	213	-56.43	2	26	5725	5751	24	0.875	1	||||||||||	||||||::||
2911	uaGGUGGGCGGAGUCGGAGGGUUUCAu	|::|||||||||||||||||||||	aaCTGCCCGCCTCAGCCTCCCAAAGTg	>hsa_piR_022437|gb|DQ600690|Homo	NM_001271852.3	217	-55.54	2	26	9969	9995	24	0.9167	1	||||||||||	||||||||||
2912	uaGGUGGGCGGAGUCGGAGGGUUUCAu	||:||| |||||||||||||||||	atCCGCCCACCTCAGCCTCCCAAAGTg	>hsa_piR_022437|gb|DQ600690|Homo	NM_001271852.3	213	-55.52	2	26	5107	5133	24	0.9167	0.9583	||||||||||	|| |||||||
2913	uaGGUGGGCGGAGUCGGAGGGUUUCAu	|::|||||||||||||||||||||	aaCTGCCCGCCTCAGCCTCCCAAAGTg	>hsa_piR_022437|gb|DQ600690|Homo	NM_001271853.3	217	-55.54	2	26	9983	10009	24	0.9167	1	||||||||||	||||||||||
2914	uaGGUGGGCGGAGUCGGAGGGUUUCAu	||:||| |||||||||||||||||	atCCGCCCACCTCAGCCTCCCAAAGTg	>hsa_piR_022437|gb|DQ600690|Homo	NM_001271853.3	213	-55.52	2	26	5121	5147	24	0.9167	0.9583	||||||||||	|| |||||||
2915	uaGGUGGGCGGAGUCGGAGGGUUUCAu	|||||||||||:||||||||||||	atCCACCCGCCTCGGCCTCCCAAAGTg	>hsa_piR_022437|gb|DQ600690|Homo	NM_001272020.2	221	-61.18	2	26	5852	5878	24	0.9583	1	||||||||||	|||||||:||
2916	uaGGUGGGCGGAGUCGGAGGGUUUCAu	|| ||:||||::||||||||||||	atCCCCCTGCCTTGGCCTCCCAAAGTt	>hsa_piR_022437|gb|DQ600690|Homo	NM_001272046.2	205	-47.53	2	26	4303	4329	24	0.8333	0.9583	||||||||||	|:||||::||
2917	uaGGUGGGCGGAGUCGGAGGGUUUCAu	:| || ||||: |||||||||||	gtTCTCCAGCCTTCACCTCCCAAAGTg	>hsa_piR_022437|gb|DQ600690|Homo	NM_001272087.2	185	-36.7	2	26	727	753	24	0.75	0.8333	||||||||||	| ||||: |
2918	uaGGUGGGCGGAGUCGGAGGGUUUCAu	|::||||||||:||||||||||||	atCTGCCCGCCTCGGCCTCCCAAAGTg	>hsa_piR_022437|gb|DQ600690|Homo	NM_001272103.2	213	-56.02	2	26	2539	2565	24	0.875	1	||||||||||	|||||||:||
2919	uaGGUGGGCGGAGUCGGAGGGUUUCAu	|: ||:|||||: |||||||||||	acCTTCCTGCCTCGACCTCCCAAAGTg	>hsa_piR_022437|gb|DQ600690|Homo	NM_001276264.2	197	-46.42	2	26	1728	1754	24	0.7917	0.9167	||||||||||	|:|||||: |
2920	uaGGUGGGCGGAGUCGGAGGGUUUCAu	|: ||:|||||: |||||||||||	acCTTCCTGCCTCGACCTCCCAAAGTg	>hsa_piR_022437|gb|DQ600690|Homo	NM_001276265.1	197	-46.42	2	26	1232	1258	24	0.7917	0.9167	||||||||||	|:|||||: |
2921	uaGGUGGGCGGAGUCGGAGGGUUUCAu	|: ||:|||||: |||||||||||	acCTTCCTGCCTCGACCTCCCAAAGTg	>hsa_piR_022437|gb|DQ600690|Homo	NM_001276267.2	197	-46.42	2	26	2772	2798	24	0.7917	0.9167	||||||||||	|:|||||: |
2922	uaGGUGGGCGGAGUCGGAGGGUUUCAu	|: ||:|||||: |||||||||||	acCTTCCTGCCTCGACCTCCCAAAGTg	>hsa_piR_022437|gb|DQ600690|Homo	NM_001276268.2	197	-46.42	2	26	2431	2457	24	0.7917	0.9167	||||||||||	|:|||||: |
2923	uaGGUGGGCGGAGUCGGAGGGUUUCAu	||:||:||||||||||||||||||	acCCGCCTGCCTCAGCCTCCCAAAGTg	>hsa_piR_022437|gb|DQ600690|Homo	NM_001276351.2	217	-56.44	2	26	89	115	24	0.9167	1	||||||||||	|:||||||||
2924	uaGGUGGGCGGAGUCGGAGGGUUUCAu	||:||:||||||||||||||||||	acCCGCCTGCCTCAGCCTCCCAAAGTg	>hsa_piR_022437|gb|DQ600690|Homo	NM_001276352.2	217	-56.44	2	26	89	115	24	0.9167	1	||||||||||	|:||||||||
2925	uaGGUGGGCGGAGUCGGAGGGUUUCAu	||||||||||| ||||||||||||	gtCCACCCGCCTCTGCCTCCCAAAGTg	>hsa_piR_022437|gb|DQ600690|Homo	NM_001277090.2	217	-57.18	2	26	2838	2864	24	0.9583	0.9583	||||||||||	||||||| ||
2926	uaGGUGGGCGGAGUCGGAGGGUUUCAu	||||||| ||| |||||||||||	atCCACCCGACTCCACCTCCCAAAGTg	>hsa_piR_022437|gb|DQ600690|Homo	NM_001277120.2	201	-47.58	2	26	3502	3528	24	0.875	0.875	||||||||||	||| ||| |
2927	uaGGUGGGCGGAGUCGGAGGGUUUCAu	|::||:||||::|:||||||||||	atCTGCCTGCCTTGGTCTCCCAAAGTg	>hsa_piR_022437|gb|DQ600690|Homo	NM_001277197.2	201	-46.65	2	26	2222	2248	24	0.75	1	||||||||||	|:||||::|:
2928	uaGGUGGGCGGAGUCGGAGGGUUUCAu	|::||:||||::|:||||||||||	atCTGCCTGCCTTGGTCTCCCAAAGTg	>hsa_piR_022437|gb|DQ600690|Homo	NM_001277198.2	201	-46.65	2	26	2316	2342	24	0.75	1	||||||||||	|:||||::|:
2929	uaGGUGGGCGGAGUCGGAGGGUUUCAu	|::||:||||::|:||||||||||	atCTGCCTGCCTTGGTCTCCCAAAGTg	>hsa_piR_022437|gb|DQ600690|Homo	NM_001277199.2	201	-46.65	2	26	2641	2667	24	0.75	1	||||||||||	|:||||::|:
2930	uaGGUGGGCGGAGUCGGAGGGUUUCAu	||||||||||::||||||||||||	atCCACCCGCCTTGGCCTCCCAAAGTg	>hsa_piR_022437|gb|DQ600690|Homo	NM_001277783.2	217	-56.9	2	26	2214	2240	24	0.9167	1	||||||||||	||||||::||
2931	uaGGUGGGCGGAGUCGGAGGGUUUCAu	| :||:||||:|||||||||||||	atCAGCCTGCCTTAGCCTCCCAAAGTg	>hsa_piR_022437|gb|DQ600690|Homo	NM_001278054.1	205	-49.03	2	26	2453	2479	24	0.8333	0.9583	||||||||||	|:||||:|||
2932	uaGGUGGGCGGAGUCGGAGGGUUUCAu	||:||| |||||||||||||||||	atCCGCCCACCTCAGCCTCCCAAAGTg	>hsa_piR_022437|gb|DQ600690|Homo	NM_001278172.2	213	-55.52	2	26	11896	11922	24	0.9167	0.9583	||||||||||	|| |||||||
2933	uaGGUGGGCGGAGUCGGAGGGUUUCAu	|||||:||||::||||||||||||	atCCACCTGCCTTGGCCTCCCAAAGTc	>hsa_piR_022437|gb|DQ600690|Homo	NM_001278172.2	213	-51.91	2	26	12839	12865	24	0.875	1	||||||||||	|:||||::||
2934	uaGGUGGGCGGAGUCGGAGGGUUUCAu	|| : :||||||||||||||||||	atCCTTGTGCCTCAGCCTCCCAAAGTg	>hsa_piR_022437|gb|DQ600690|Homo	NM_001278172.2	201	-48.5	2	26	4850	4876	24	0.8333	0.9167	||||||||||	:||||||||
2935	uaGGUGGGCGGAGUCGGAGGGUUUCAu	|||||:||||::||||||||||||	atCCACCTGCCTTGGCCTCCCAAAGTg	>hsa_piR_022437|gb|DQ600690|Homo	NM_001278176.2	213	-54.1	2	26	457	483	24	0.875	1	||||||||||	|:||||::||
2936	uaGGUGGGCGGAGUCGGAGGGUUUCAu	|::||| ||||:|:||||||||||	atCTGCCCACCTCGGTCTCCCAAAGTg	>hsa_piR_022437|gb|DQ600690|Homo	NM_001278187.2	201	-47.89	2	26	2811	2837	24	0.7917	0.9583	||||||||||	|| ||||:|:
2937	uaGGUGGGCGGAGUCGGAGGGUUUCAu	||:|||||:||:||||||||||||	atCCGCCCGCTTCGGCCTCCCAAAGTg	>hsa_piR_022437|gb|DQ600690|Homo	NM_001278202.2	213	-57.77	2	26	3469	3495	24	0.875	1	||||||||||	||||:||:||
2938	uaGGUGGGCGGAGUCGGAGGGUUUCAu	||:||| : ||:||||||||||||	acCCGCCCTTGTCGGCCTCCCAAAGTg	>hsa_piR_022437|gb|DQ600690|Homo	NM_001278202.2	197	-45.54	2	26	2085	2111	24	0.7917	0.9167	||||||||||	|| : ||:||
2939	uaGGUGGGCGGAGUCGGAGGGUUUCAu	||:|||||:||:||||||||||||	atCCGCCCGCTTCGGCCTCCCAAAGTg	>hsa_piR_022437|gb|DQ600690|Homo	NM_001278203.1	213	-57.77	2	26	2992	3018	24	0.875	1	||||||||||	||||:||:||
2940	uaGGUGGGCGGAGUCGGAGGGUUUCAu	||:||| : ||:||||||||||||	acCCGCCCTTGTCGGCCTCCCAAAGTg	>hsa_piR_022437|gb|DQ600690|Homo	NM_001278203.1	197	-45.54	2	26	1608	1634	24	0.7917	0.9167	||||||||||	|| : ||:||
2941	uaGGUGGGCGGAGUCGGAGGGUUUCAu	|||||:||||::| ||||||||||	gtCCACCTGCCTTGGACTCCCAAAGTg	>hsa_piR_022437|gb|DQ600690|Homo	NM_001278241.2	205	-47.3	2	26	4206	4232	24	0.8333	0.9583	||||||||||	|:||||::|
2942	uaGGUGGGCGGAGUCGGAGGGUUUCAu	|::||||||||:||||||||||||	agCTGCCCGCCTCGGCCTCCCAAAGTg	>hsa_piR_022437|gb|DQ600690|Homo	NM_001278243.2	213	-54.88	2	26	3382	3408	24	0.875	1	||||||||||	|||||||:||
2943	uaGGUGGGCGGAGUCGGAGGGUUUCAu	|::||||||||:||||||||||||	agCTGCCCGCCTCGGCCTCCCAAAGTg	>hsa_piR_022437|gb|DQ600690|Homo	NM_001278244.1	213	-54.88	2	26	3281	3307	24	0.875	1	||||||||||	|||||||:||
2944	uaGGUGGGCGGAGUCGGAGGGUUUCAu	|::||||||||:||||||||||||	agCTGCCCGCCTCGGCCTCCCAAAGTg	>hsa_piR_022437|gb|DQ600690|Homo	NM_001278245.2	213	-54.88	2	26	3379	3405	24	0.875	1	||||||||||	|||||||:||
2945	uaGGUGGGCGGAGUCGGAGGGUUUCAu	|| :|||||||:||||||||||||	gtCCTTCCGCCTCGGCCTCCCAAAGTg	>hsa_piR_022437|gb|DQ600690|Homo	NM_001278251.2	209	-53.95	2	26	166	192	24	0.875	0.9583	||||||||||	|||||||:||
2946	uaGGUGGGCGGAGUCGGAGGGUUUCAu	|| || |||||:||||||||||||	gtCCTCCAGCCTCGGCCTCCCAAAGTa	>hsa_piR_022437|gb|DQ600690|Homo	NM_001278268.2	205	-49.32	2	26	2544	2570	24	0.875	0.9167	||||||||||	| |||||:||
2947	uaGGUGGGCGGAGUCGGAGGGUUUCAu	:| ||:|||||||:||||||||||	atTCCCCTGCCTCAGTCTCCCAAAGTg	>hsa_piR_022437|gb|DQ600690|Homo	NM_001278312.2	205	-50.69	2	26	7335	7361	24	0.8333	0.9583	||||||||||	|:|||||||:
2948	uaGGUGGGCGGAGUCGGAGGGUUUCAu	|::|||||||| |||||||||||	atCTGCCCGCCTCCACCTCCCAAAGTg	>hsa_piR_022437|gb|DQ600690|Homo	NM_001278312.2	201	-48.91	2	26	5757	5783	24	0.8333	0.9167	||||||||||	||||||| |
2949	uaGGUGGGCGGAGUCGGAGGGUUUCAu	|::||:|| |||||||||||||||	atCTGCCTGCGTCAGCCTCCCAAAGTg	>hsa_piR_022437|gb|DQ600690|Homo	NM_001278408.1	205	-48.7	2	26	480	506	24	0.8333	0.9583	||||||||||	|:|| |||||
2950	uaGGUGGGCGGAGUCGGAGGGUUUCAu	|| ||: : |::||||||||||||	atCCTCCTATGTTGGCCTCCCAAAGTg	>hsa_piR_022437|gb|DQ600690|Homo	NM_001278422.1	185	-37.94	2	26	2042	2068	24	0.7083	0.875	||||||||||	|: : |::||
2951	uaGGUGGGCGGAGUCGGAGGGUUUCAu	||:||||||||:||||||||||||	atCCGCCCGCCTCGGCCTCCCAAAGTg	>hsa_piR_022437|gb|DQ600690|Homo	NM_001278462.2	217	-60.71	2	26	8876	8902	24	0.9167	1	||||||||||	|||||||:||
2952	uaGGUGGGCGGAGUCGGAGGGUUUCAu	|||||:|||||:||||||||||||	gtCCACCTGCCTCGGCCTCCCAAAGTg	>hsa_piR_022437|gb|DQ600690|Homo	NM_001278462.2	217	-58.07	2	26	9588	9614	24	0.9167	1	||||||||||	|:|||||:||
2953	uaGGUGGGCGGAGUCGGAGGGUUUCAu	||:||| ||||:||||||||||||	atCCGCCCACCTCGGCCTCCCAAAGTg	>hsa_piR_022437|gb|DQ600690|Homo	NM_001278462.2	209	-54.87	2	26	1567	1593	24	0.875	0.9583	||||||||||	|| ||||:||
2954	uaGGUGGGCGGAGUCGGAGGGUUUCAu	||:||| ||||:||||||||||||	atCCGCCCACCTCGGCCTCCCAAAGTa	>hsa_piR_022437|gb|DQ600690|Homo	NM_001278462.2	209	-54.97	2	26	7376	7402	24	0.875	0.9583	||||||||||	|| ||||:||
2955	uaGGUGGGCGGAGUCGGAGGGUUUCAu	||:||:||||| ||||||||||||	atCCGCCTGCCTCTGCCTCCCAAAGTg	>hsa_piR_022437|gb|DQ600690|Homo	NM_001278462.2	209	-54.22	2	26	10134	10160	24	0.875	0.9583	||||||||||	|:||||| ||
2956	uaGGUGGGCGGAGUCGGAGGGUUUCAu	|||||:||:|::||||||||||||	acCCACCTGCTTTGGCCTCCCAAAGTg	>hsa_piR_022437|gb|DQ600690|Homo	NM_001278462.2	209	-49.04	2	26	10513	10539	24	0.8333	1	||||||||||	|:||:|::||
2957	uaGGUGGGCGGAGUCGGAGGGUUUCAu	|::||:|||||:||||||||||||	atCTGCCTGCCTCGGCCTCCCAAAGTg	>hsa_piR_022437|gb|DQ600690|Homo	NM_001278462.2	209	-53.22	2	26	10822	10848	24	0.8333	1	||||||||||	|:|||||:||
2958	uaGGUGGGCGGAGUCGGAGGGUUUCAu	|::||:|||||:||||||||||||	atCTGCCTGCCTCGGCCTCCCAAAGTg	>hsa_piR_022437|gb|DQ600690|Homo	NM_001278462.2	209	-53.22	2	26	10901	10927	24	0.8333	1	||||||||||	|:|||||:||
2959	uaGGUGGGCGGAGUCGGAGGGUUUCAu	||| :||||||:||||||||||||	atCCAGTCGCCTCGGCCTCCCAAAGTg	>hsa_piR_022437|gb|DQ600690|Homo	NM_001278462.2	209	-54.57	2	26	11036	11062	24	0.875	0.9583	||||||||||	:||||||:||
2960	uaGGUGGGCGGAGUCGGAGGGUUUCAu	|::|||||||::||||||||||||	atCTGCCCGCCTTGGCCTCCCAAAGTg	>hsa_piR_022437|gb|DQ600690|Homo	NM_001278469.3	209	-51.74	2	26	8232	8258	24	0.8333	1	||||||||||	||||||::||
2961	uaGGUGGGCGGAGUCGGAGGGUUUCAu	|::|||||||::||||||||||||	atCTGCCCGCCTTGGCCTCCCAAAGTg	>hsa_piR_022437|gb|DQ600690|Homo	NM_001278470.2	209	-51.74	2	26	8153	8179	24	0.8333	1	||||||||||	||||||::||
2962	uaGGUGGGCGGAGUCGGAGGGUUUCAu	|::|||||||::||||||||||||	atCTGCCCGCCTTGGCCTCCCAAAGTg	>hsa_piR_022437|gb|DQ600690|Homo	NM_001278471.2	209	-51.74	2	26	8084	8110	24	0.8333	1	||||||||||	||||||::||
2963	uaGGUGGGCGGAGUCGGAGGGUUUCAu	|::|||||||::||||||||||||	atCTGCCCGCCTTGGCCTCCCAAAGTg	>hsa_piR_022437|gb|DQ600690|Homo	NM_001278472.2	209	-51.74	2	26	8249	8275	24	0.8333	1	||||||||||	||||||::||
2964	uaGGUGGGCGGAGUCGGAGGGUUUCAu	|::|||||||::||||||||||||	atCTGCCCGCCTTGGCCTCCCAAAGTg	>hsa_piR_022437|gb|DQ600690|Homo	NM_001278513.2	209	-51.74	2	26	4591	4617	24	0.8333	1	||||||||||	||||||::||
2965	uaGGUGGGCGGAGUCGGAGGGUUUCAu	|::|||||||::||||||||||||	atCTGCCCGCCTTGGCCTCCCAAAGTg	>hsa_piR_022437|gb|DQ600690|Homo	NM_001278514.2	209	-51.74	2	26	4259	4285	24	0.8333	1	||||||||||	||||||::||
2966	uaGGUGGGCGGAGUCGGAGGGUUUCAu	:| |||||||||||||||||||||	atTCCCCCGCCTCAGCCTCCCAAAGTg	>hsa_piR_022437|gb|DQ600690|Homo	NM_001278516.1	213	-55.78	2	26	2662	2688	24	0.9167	0.9583	||||||||||	||||||||||
2967	uaGGUGGGCGGAGUCGGAGGGUUUCAu	|::||| |||||||||||||||||	atCTGCCCACCTCAGCCTCCCAAAGTa	>hsa_piR_022437|gb|DQ600690|Homo	NM_001278516.1	209	-50.93	2	26	7281	7307	24	0.875	0.9583	||||||||||	|| |||||||
2968	uaGGUGGGCGGAGUCGGAGGGUUUCAu	|::|||||||::||||||||||||	atCTGCCCGCCTTGGCCTCCCAAAGTa	>hsa_piR_022437|gb|DQ600690|Homo	NM_001278516.1	209	-51.84	2	26	9530	9556	24	0.8333	1	||||||||||	||||||::||
2969	uaGGUGGGCGGAGUCGGAGGGUUUCAu	|||| | ||||:||||||||||||	atCCACACACCTCGGCCTCCCAAAGTc	>hsa_piR_022437|gb|DQ600690|Homo	NM_001278516.1	205	-45.72	2	26	4450	4476	24	0.875	0.9167	||||||||||	| ||||:||
2970	uaGGUGGGCGGAGUCGGAGGGUUUCAu	:| |||||||||||||||||||||	atTCCCCCGCCTCAGCCTCCCAAAGTg	>hsa_piR_022437|gb|DQ600690|Homo	NM_001278517.1	213	-55.78	2	26	2436	2462	24	0.9167	0.9583	||||||||||	||||||||||
2971	uaGGUGGGCGGAGUCGGAGGGUUUCAu	|::||| |||||||||||||||||	atCTGCCCACCTCAGCCTCCCAAAGTa	>hsa_piR_022437|gb|DQ600690|Homo	NM_001278517.1	209	-50.93	2	26	7055	7081	24	0.875	0.9583	||||||||||	|| |||||||
2972	uaGGUGGGCGGAGUCGGAGGGUUUCAu	|::|||||||::||||||||||||	atCTGCCCGCCTTGGCCTCCCAAAGTa	>hsa_piR_022437|gb|DQ600690|Homo	NM_001278517.1	209	-51.84	2	26	9304	9330	24	0.8333	1	||||||||||	||||||::||
2973	uaGGUGGGCGGAGUCGGAGGGUUUCAu	|||| | ||||:||||||||||||	atCCACACACCTCGGCCTCCCAAAGTc	>hsa_piR_022437|gb|DQ600690|Homo	NM_001278517.1	205	-45.72	2	26	4224	4250	24	0.875	0.9167	||||||||||	| ||||:||
2974	uaGGUGGGCGGAGUCGGAGGGUUUCAu	:| |||||||||||||||||||||	atTCCCCCGCCTCAGCCTCCCAAAGTg	>hsa_piR_022437|gb|DQ600690|Homo	NM_001278518.1	213	-55.78	2	26	2251	2277	24	0.9167	0.9583	||||||||||	||||||||||
2975	uaGGUGGGCGGAGUCGGAGGGUUUCAu	|::||| |||||||||||||||||	atCTGCCCACCTCAGCCTCCCAAAGTa	>hsa_piR_022437|gb|DQ600690|Homo	NM_001278518.1	209	-50.93	2	26	6870	6896	24	0.875	0.9583	||||||||||	|| |||||||
2976	uaGGUGGGCGGAGUCGGAGGGUUUCAu	|::|||||||::||||||||||||	atCTGCCCGCCTTGGCCTCCCAAAGTa	>hsa_piR_022437|gb|DQ600690|Homo	NM_001278518.1	209	-51.84	2	26	9119	9145	24	0.8333	1	||||||||||	||||||::||
2977	uaGGUGGGCGGAGUCGGAGGGUUUCAu	|||| | ||||:||||||||||||	atCCACACACCTCGGCCTCCCAAAGTc	>hsa_piR_022437|gb|DQ600690|Homo	NM_001278518.1	205	-45.72	2	26	4039	4065	24	0.875	0.9167	||||||||||	| ||||:||
2978	uaGGUGGGCGGAGUCGGAGGGUUUCAu	:| |||||||||||||||||||||	atTCCCCCGCCTCAGCCTCCCAAAGTg	>hsa_piR_022437|gb|DQ600690|Homo	NM_001278519.1	213	-55.78	2	26	2061	2087	24	0.9167	0.9583	||||||||||	||||||||||
2979	uaGGUGGGCGGAGUCGGAGGGUUUCAu	|::||| |||||||||||||||||	atCTGCCCACCTCAGCCTCCCAAAGTa	>hsa_piR_022437|gb|DQ600690|Homo	NM_001278519.1	209	-50.93	2	26	6680	6706	24	0.875	0.9583	||||||||||	|| |||||||
2980	uaGGUGGGCGGAGUCGGAGGGUUUCAu	|::|||||||::||||||||||||	atCTGCCCGCCTTGGCCTCCCAAAGTa	>hsa_piR_022437|gb|DQ600690|Homo	NM_001278519.1	209	-51.84	2	26	8929	8955	24	0.8333	1	||||||||||	||||||::||
2981	uaGGUGGGCGGAGUCGGAGGGUUUCAu	|||| | ||||:||||||||||||	atCCACACACCTCGGCCTCCCAAAGTc	>hsa_piR_022437|gb|DQ600690|Homo	NM_001278519.1	205	-45.72	2	26	3849	3875	24	0.875	0.9167	||||||||||	| ||||:||
2982	uaGGUGGGCGGAGUCGGAGGGUUUCAu	||:||:|||||:||||||||||||	atCCGCCTGCCTCGGCCTCCCAAAGTg	>hsa_piR_022437|gb|DQ600690|Homo	NM_001278546.2	213	-57.91	2	26	4649	4675	24	0.875	1	||||||||||	|:|||||:||
2983	uaGGUGGGCGGAGUCGGAGGGUUUCAu	|||||:||||::||||||||||||	atCCACCTGCCTTGGCCTCCCAAAGTg	>hsa_piR_022437|gb|DQ600690|Homo	NM_001278549.2	213	-54.1	2	26	9755	9781	24	0.875	1	||||||||||	|:||||::||
2984	uaGGUGGGCGGAGUCGGAGGGUUUCAu	|| ||:||||::||||||||||||	atCCTCCTGCCTTGGCCTCCCAAAGTg	>hsa_piR_022437|gb|DQ600690|Homo	NM_001278549.2	205	-49.71	2	26	11077	11103	24	0.8333	0.9583	||||||||||	|:||||::||
2985	uaGGUGGGCGGAGUCGGAGGGUUUCAu	||:||:|||||:||||||||||||	atCCGCCTGCCTCGGCCTCCCAAAGTg	>hsa_piR_022437|gb|DQ600690|Homo	NM_001278593.2	213	-57.91	2	26	2796	2822	24	0.875	1	||||||||||	|:|||||:||
2986	uaGGUGGGCGGAGUCGGAGGGUUUCAu	||:||| ||||:||||||||||||	atCCGCCCACCTCGGCCTCCCAAAGTg	>hsa_piR_022437|gb|DQ600690|Homo	NM_001278593.2	209	-54.87	2	26	4164	4190	24	0.875	0.9583	||||||||||	|| ||||:||
2987	uaGGUGGGCGGAGUCGGAGGGUUUCAu	|::||:||||::||||||||||||	atCTGCCTGCCTTGGCCTCCCAAAGTg	>hsa_piR_022437|gb|DQ600690|Homo	NM_001278593.2	205	-48.94	2	26	3407	3433	24	0.7917	1	||||||||||	|:||||::||
2988	uaGGUGGGCGGAGUCGGAGGGUUUCAu	||:||:|||||:||||||||||||	atCCGCCTGCCTCGGCCTCCCAAAGTg	>hsa_piR_022437|gb|DQ600690|Homo	NM_001278594.2	213	-57.91	2	26	2998	3024	24	0.875	1	||||||||||	|:|||||:||
2989	uaGGUGGGCGGAGUCGGAGGGUUUCAu	||:||| ||||:||||||||||||	atCCGCCCACCTCGGCCTCCCAAAGTg	>hsa_piR_022437|gb|DQ600690|Homo	NM_001278594.2	209	-54.87	2	26	4366	4392	24	0.875	0.9583	||||||||||	|| ||||:||
2990	uaGGUGGGCGGAGUCGGAGGGUUUCAu	|::||:||||::||||||||||||	atCTGCCTGCCTTGGCCTCCCAAAGTg	>hsa_piR_022437|gb|DQ600690|Homo	NM_001278594.2	205	-48.94	2	26	3609	3635	24	0.7917	1	||||||||||	|:||||::||
2991	uaGGUGGGCGGAGUCGGAGGGUUUCAu	|::||| |||||||||||||||||	atCTGCCCACCTCAGCCTCCCAAAGTg	>hsa_piR_022437|gb|DQ600690|Homo	NM_001278599.1	209	-50.83	2	26	2904	2930	24	0.875	0.9583	||||||||||	|| |||||||
2992	uaGGUGGGCGGAGUCGGAGGGUUUCAu	|::||:|||||| |||||||||||	gtCTGCCTGCCTCAACCTCCCAAAGTg	>hsa_piR_022437|gb|DQ600690|Homo	NM_001278649.2	205	-47.29	2	26	2773	2799	24	0.8333	0.9583	||||||||||	|:|||||| |
2993	uaGGUGGGCGGAGUCGGAGGGUUUCAu	|| ||| |||: ||||||||||||	atCCTCCCACCTT-GCCTCCCAAAGTg	>hsa_piR_022437|gb|DQ600690|Homo	NM_001278689.2	191	-43.96	2	26	2729	2754	24	0.8333	0.875	||||||||||	|| |||: ||
2994	uaGGUGGGCGGAGUCGGAGGGUUUCAu	||||||||||||||||||||||||	atCCACCCGCCTCAGCCTCCCAAAGTg	>hsa_piR_022437|gb|DQ600690|Homo	NM_001279353.2	225	-61.83	2	26	1605	1631	24	1	1	||||||||||	||||||||||
2995	uaGGUGGGCGGAGUCGGAGGGUUUCAu	:| ||| ||||:||||||||||||	gaTCCCCCACCTCGGCCTCCCAAAGTg	>hsa_piR_022437|gb|DQ600690|Homo	NM_001281453.2	201	-51.37	2	26	5178	5204	24	0.8333	0.9167	||||||||||	|| ||||:||
2996	uaGGUGGGCGGAGUCGGAGGGUUUCAu	:| ||| ||||:||||||||||||	gaTCCCCCACCTCGGCCTCCCAAAGTg	>hsa_piR_022437|gb|DQ600690|Homo	NM_001281454.2	201	-51.37	2	26	5082	5108	24	0.8333	0.9167	||||||||||	|| ||||:||
2997	uaGGUGGGCGGAGUCGGAGGGUUUCAu	|||||:||||:: |||||||||||	atCCACCTGCCTTGACCTCCCAAAGTg	>hsa_piR_022437|gb|DQ600690|Homo	NM_001281457.2	205	-50.08	2	26	5174	5200	24	0.8333	0.9583	||||||||||	|:||||:: |
2998	uaGGUGGGCGGAGUCGGAGGGUUUCAu	|||||:||||:: |||||||||||	atCCACCTGCCTTGACCTCCCAAAGTg	>hsa_piR_022437|gb|DQ600690|Homo	NM_001281459.2	205	-50.08	2	26	5111	5137	24	0.8333	0.9583	||||||||||	|:||||:: |
2999	uaGGUGGGCGGAGUCGGAGGGUUUCAu	|||||:||||:: |||||||||||	atCCACCTGCCTTGACCTCCCAAAGTg	>hsa_piR_022437|gb|DQ600690|Homo	NM_001281460.2	205	-50.08	2	26	5577	5603	24	0.8333	0.9583	||||||||||	|:||||:: |
3000	uaGGUGGGCGGAGUCGGAGGGUUUCAu	|::||:||||||||||||||||||	atCTGCCTGCCTCAGCCTCCCAAAGTg	>hsa_piR_022437|gb|DQ600690|Homo	NM_001281723.3	213	-53.87	2	26	7526	7552	24	0.875	1	||||||||||	|:||||||||
3001	uaGGUGGGCGGAGUCGGAGGGUUUCAu	|::||:||||||||||||||||||	atCTGCCTGCCTCAGCCTCCCAAAGTg	>hsa_piR_022437|gb|DQ600690|Homo	NM_001281724.3	213	-53.87	2	26	7445	7471	24	0.875	1	||||||||||	|:||||||||
3002	uaGGUGGGCGGAGUCGGAGGGUUUCAu	|::||:||||||||||||||||||	atCTGCCTGCCTCAGCCTCCCAAAGTg	>hsa_piR_022437|gb|DQ600690|Homo	NM_001281726.2	213	-53.87	2	26	9515	9541	24	0.875	1	||||||||||	|:||||||||
3003	uaGGUGGGCGGAGUCGGAGGGUUUCAu	|| ||:||||||||||||||||||	atCCTCCTGCCTCAGCCTCCCAAAGTg	>hsa_piR_022437|gb|DQ600690|Homo	NM_001281731.1	213	-54.64	2	26	489	515	24	0.9167	0.9583	||||||||||	|:||||||||
3004	uaGGUGGGCGGAGUCGGAGGGUUUCAu	|||||| :|||:||||||||||||	atCCACCCATCTCGGCCTCCCAAAGTg	>hsa_piR_022437|gb|DQ600690|Homo	NM_001282163.1	209	-53.33	2	26	6869	6895	24	0.875	0.9583	||||||||||	|| :|||:||
3005	uaGGUGGGCGGAGUCGGAGGGUUUCAu	||||||||||::||||||||||||	atCCACCCGCCTTGGCCTCCCAAAGTg	>hsa_piR_022437|gb|DQ600690|Homo	NM_001282224.1	217	-56.9	2	26	5710	5736	24	0.9167	1	||||||||||	||||||::||
3006	uaGGUGGGCGGAG-UCGGAGGGUUUCAu	||||:|||| | | ||||||||||	atCCACTCGCCCCTTGGCTCCCAAAGTg	>hsa_piR_022437|gb|DQ600690|Homo	NM_001282225.2	188	-42.9	2	26	2229	2256	25	0.8	0.84	||||||||||	|||| | |
3007	uaGGUGGGCGGAG-UCGGAGGGUUUCAu	||||:|||| | | ||||||||||	atCCACTCGCCCCTTGGCTCCCAAAGTg	>hsa_piR_022437|gb|DQ600690|Homo	NM_001282226.2	188	-42.9	2	26	2196	2223	25	0.8	0.84	||||||||||	|||| | |
3008	uaGGUGGGCGGAG-UCGGAGGGUUUCAu	||||:|||| | | ||||||||||	atCCACTCGCCCCTTGGCTCCCAAAGTg	>hsa_piR_022437|gb|DQ600690|Homo	NM_001282227.2	188	-42.9	2	26	2146	2173	25	0.8	0.84	||||||||||	|||| | |
3009	uaGGUGGGCGGAG-UCGGAGGGUUUCAu	||||:|||| | | ||||||||||	atCCACTCGCCCCTTGGCTCCCAAAGTg	>hsa_piR_022437|gb|DQ600690|Homo	NM_001282228.2	188	-42.9	2	26	2104	2131	25	0.8	0.84	||||||||||	|||| | |
3010	uaGGUGGGCGGAG-UCGGAGGGUUUCAu	||||:|||| | | ||||||||||	atCCACTCGCCCCTTGGCTCCCAAAGTg	>hsa_piR_022437|gb|DQ600690|Homo	NM_001282229.1	188	-42.9	2	26	2011	2038	25	0.8	0.84	||||||||||	|||| | |
3011	uaGGUGGGCGGAGUCGGAGGGUUUCAu	|::|||||||||||||||||||||	atCTGCCCGCCTCAGCCTCCCAAAGTg	>hsa_piR_022437|gb|DQ600690|Homo	NM_001282236.2	217	-56.67	2	26	448	474	24	0.9167	1	||||||||||	||||||||||
3012	uaGGUGGGCGGAGUCGGAGGGUUUCAu	|::|:|||:|||||||||||||||	atCTGCTCGCTTCAGCCTCCCAAAGTg	>hsa_piR_022437|gb|DQ600690|Homo	NM_001282278.1	209	-50.66	2	26	3868	3894	24	0.8333	1	||||||||||	:|||:|||||
3013	uaGGUGGGCGGAGUCGGAGGGUUUCAu	|::||:||||||||||||||||||	atCTGCCTGCCTCAGCCTCCCAAAGTg	>hsa_piR_022437|gb|DQ600690|Homo	NM_001282282.2	213	-53.87	2	26	5089	5115	24	0.875	1	||||||||||	|:||||||||
3014	uaGGUGGGCGGAGUCGGAGGGUUUCAu	|||||:|||||:||||||||||||	atCCACCTGCCTCGGCCTCCCAAAGTg	>hsa_piR_022437|gb|DQ600690|Homo	NM_001282334.1	217	-58.38	2	26	992	1018	24	0.9167	1	||||||||||	|:|||||:||
3015	uaGGUGGGCGGAGUCGGAGGGUUUCAu	|| |||||||||||||||||||||	atCCTCCCGCCTCAGCCTCCCAAAGTg	>hsa_piR_022437|gb|DQ600690|Homo	NM_001282334.1	217	-57.44	2	26	4538	4564	24	0.9583	0.9583	||||||||||	||||||||||
3016	uaGGUGGGCGGAGUCGGAGGGUUUCAu	||:||| ||||:||||||||||||	atCCGCCCACCTCGGCCTCCCAAAGTg	>hsa_piR_022437|gb|DQ600690|Homo	NM_001282334.1	209	-54.87	2	26	4835	4861	24	0.875	0.9583	||||||||||	|| ||||:||
3017	uaGGUGGGCGGAGUCGGAGGGUUUCAu	|| |||||||||||||||||||||	atCCTCCCGCCTCAGCCTCCCAAAGTg	>hsa_piR_022437|gb|DQ600690|Homo	NM_001282335.2	217	-57.44	2	26	4228	4254	24	0.9583	0.9583	||||||||||	||||||||||
3018	uaGGUGGGCGGAGUCGGAGGGUUUCAu	||:||| ||||:||||||||||||	atCCGCCCACCTCGGCCTCCCAAAGTg	>hsa_piR_022437|gb|DQ600690|Homo	NM_001282335.2	209	-54.87	2	26	4525	4551	24	0.875	0.9583	||||||||||	|| ||||:||
3019	uaGGUGGGCGGAGUCGGAGGGUUUCAu	||:||||:|||:||||||||||||	atCCGCCCGTCTCGGCCTCCCAAAGTg	>hsa_piR_022437|gb|DQ600690|Homo	NM_001282338.2	213	-58.42	2	26	219	245	24	0.875	1	||||||||||	|||:|||:||
3020	uaGGUGGGCGGAGUCGGAGGGUUUCAu	|||||| |||||||||||||||||	atCCACCCTCCTCAGCCTCCCAAAGTg	>hsa_piR_022437|gb|DQ600690|Homo	NM_001282380.1	217	-55.6	2	26	5143	5169	24	0.9583	0.9583	||||||||||	|| |||||||
3021	uaGGUGGGCGGAGUCGGAGGGUUUCAu	||:||||||||:||||||||||||	atCCGCCCGCCTCGGCCTCCCAAAGTg	>hsa_piR_022437|gb|DQ600690|Homo	NM_001282398.2	217	-60.71	2	26	3008	3034	24	0.9167	1	||||||||||	|||||||:||
3022	uaGGUGGGCGGAGUCGGAGGGUUUCAu	|||||| ||||:||||||||||||	atCCACCCACCTCGGCCTCCCAAAGTg	>hsa_piR_022437|gb|DQ600690|Homo	NM_001282436.1	213	-55.34	2	26	2439	2465	24	0.9167	0.9583	||||||||||	|| ||||:||
3023	uaGGUGGGCGGAGUCGGAGGGUUUCAu	|||||| ||||:||||||||||||	atCCACCCACCTCGGCCTCCCAAAGTg	>hsa_piR_022437|gb|DQ600690|Homo	NM_001282437.1	213	-55.34	2	26	2450	2476	24	0.9167	0.9583	||||||||||	|| ||||:||
3024	uaGGUGGGCGGAGUCGGAGGGUUUCAu	|||||| ||||:||||||||||||	atCCACCCACCTCGGCCTCCCAAAGTg	>hsa_piR_022437|gb|DQ600690|Homo	NM_001282438.1	213	-55.34	2	26	2301	2327	24	0.9167	0.9583	||||||||||	|| ||||:||
3025	uaGGUGGGCGGAGUCGGAGGGUUUCAu	|||||| ||||:||||||||||||	atCCACCCACCTCGGCCTCCCAAAGTg	>hsa_piR_022437|gb|DQ600690|Homo	NM_001282439.1	213	-55.34	2	26	2328	2354	24	0.9167	0.9583	||||||||||	|| ||||:||
3026	uaGGUGGGCGGAGUCGGAGGGUUUCAu	|| ||| |:|||||||||||||||	atCCTCCCCCTTCAGCCTCCCAAAGTg	>hsa_piR_022437|gb|DQ600690|Homo	NM_001282456.4	205	-47.79	2	26	3130	3156	24	0.875	0.9167	||||||||||	|| |:|||||
3027	uaGGUGGGCGGAGUCGGAGGGUUUCAu	|||||:||||::||||||||||||	atCCACCTGCCTTGGCCTCCCAAAGTa	>hsa_piR_022437|gb|DQ600690|Homo	NM_001282512.3	213	-54.2	2	26	1397	1423	24	0.875	1	||||||||||	|:||||::||
3028	uaGGUGGGCGGAGUCGGAGGGUUUCAu	|::||| |||::||||||||||||	atCTGCCCACCTTGGCCTCCCAAAGTg	>hsa_piR_022437|gb|DQ600690|Homo	NM_001282515.2	201	-45.9	2	26	6138	6164	24	0.7917	0.9583	||||||||||	|| |||::||
3029	uaGGUGGGCGGAGUCGGAGGGUUUCAu	|::||| |||::||||||||||||	atCTGCCCACCTTGGCCTCCCAAAGTg	>hsa_piR_022437|gb|DQ600690|Homo	NM_001282518.2	201	-45.9	2	26	6096	6122	24	0.7917	0.9583	||||||||||	|| |||::||
3030	uaGGUGGGCGGAGUCGGAGGGUUUCAu	|::|:| |||::||||||||||||	atCTGCTCACCTTGGCCTCCCAAAGTg	>hsa_piR_022437|gb|DQ600690|Homo	NM_001282561.1	197	-42.83	2	26	4860	4886	24	0.75	0.9583	||||||||||	:| |||::||
3031	uaGGUGGGCGGAGUCGGAGGGUUUCAu	|::|:| |||::||||||||||||	atCTGCTCACCTTGGCCTCCCAAAGTg	>hsa_piR_022437|gb|DQ600690|Homo	NM_001282562.1	197	-42.83	2	26	4918	4944	24	0.75	0.9583	||||||||||	:| |||::||
3032	uaGGUGGGCGGAGUCGGAGGGUUUCAu	|:|||| |||||||||||||||||	gtCTACCCACCTCAGCCTCCCAAAGTg	>hsa_piR_022437|gb|DQ600690|Homo	NM_001282587.2	213	-52.97	2	26	4748	4774	24	0.9167	0.9583	||||||||||	|| |||||||
3033	uaGGUGGGCGGAGUCGGAGGGUUUCAu	|||:||||||::||||||||||||	atCCATCCGCCTTGGCCTCCCAAAGTg	>hsa_piR_022437|gb|DQ600690|Homo	NM_001282587.2	213	-54.55	2	26	8862	8888	24	0.875	1	||||||||||	||||||::||
3034	uaGGUGGGCGGAGUCGGAGGGUUUCAu	||:||| |||||||||||||||||	atCCGCCCACCTCAGCCTCCCAAAGTg	>hsa_piR_022437|gb|DQ600690|Homo	NM_001282669.1	213	-55.52	2	26	1808	1834	24	0.9167	0.9583	||||||||||	|| |||||||
3035	uaGGUGGGCGGAGUCGGAGGGUUUCAu	|::||||||||:|:||||||||||	atCTGCCCGCCTCGGTCTCCCAAAGTg	>hsa_piR_022437|gb|DQ600690|Homo	NM_001282669.1	209	-53.73	2	26	2495	2521	24	0.8333	1	||||||||||	|||||||:|:
3036	uaGGUGGGCGGAGUCGGAGGGUUUCAu	|||||:|||||:||||||||||||	atCCACCTGCCTCGGCCTCCCAAAGTg	>hsa_piR_022437|gb|DQ600690|Homo	NM_001282670.1	217	-58.38	2	26	1378	1404	24	0.9167	1	||||||||||	|:|||||:||
3037	uaGGUGGGCGGAGUCGGAGGGUUUCAu	|::||||||||:||||||||||||	atCTGCCCGCCTCGGCCTCCCAAAGTg	>hsa_piR_022437|gb|DQ600690|Homo	NM_001282670.1	213	-56.02	2	26	1696	1722	24	0.875	1	||||||||||	|||||||:||
3038	uaGGUGGGCGGAGUCGGAGGGUUUCAu	||||||||||::||||||||||||	atCCACCCGCCTTGGCCTCCCAAAGTg	>hsa_piR_022437|gb|DQ600690|Homo	NM_001282679.2	217	-56.9	2	26	6506	6532	24	0.9167	1	||||||||||	||||||::||
3039	uaGGUGGGCGGAGUCGGAGGGUUUCAu	||||||||||::||||||||||||	atCCACCCGCCTTGGCCTCCCAAAGTg	>hsa_piR_022437|gb|DQ600690|Homo	NM_001282680.3	217	-56.9	2	26	6452	6478	24	0.9167	1	||||||||||	||||||::||
3040	uaGGUGGGCGGAGUCGGAGGGUUUCAu	||||||||||::||||||||||||	atCCACCCGCCTTGGCCTCCCAAAGTg	>hsa_piR_022437|gb|DQ600690|Homo	NM_001282681.3	217	-56.9	2	26	6223	6249	24	0.9167	1	||||||||||	||||||::||
3041	uaGGUGGGCGGAGUCGGAGGGUUUCAu	|||||||||||:||||||||||||	atCCACCCGCCTCGGCCTCCCAAAGTg	>hsa_piR_022437|gb|DQ600690|Homo	NM_001282683.2	221	-61.18	2	26	5283	5309	24	0.9583	1	||||||||||	|||||||:||
3042	uaGGUGGGCGGAGUCGGAGGGUUUCAu	||:|||||||||||||||||||||	atCCGCCCGCCTCAGCCTCCCAAAGTg	>hsa_piR_022437|gb|DQ600690|Homo	NM_001282715.1	221	-61.36	2	26	3479	3505	24	0.9583	1	||||||||||	||||||||||
3043	uaGGUGGGCGGAGUCGGAGGGUUUCAu	|::||||||||:| ||||||||||	atCTGCCCGCCTCGGGCTCCCAAAGTg	>hsa_piR_022437|gb|DQ600690|Homo	NM_001282729.1	205	-51.28	2	26	3411	3437	24	0.8333	0.9583	||||||||||	|||||||:|
3044	uaGGUGGGCGGAGUCGGAGGGUUUCAu	|::||||||||:| ||||||||||	atCTGCCCGCCTCGGGCTCCCAAAGTg	>hsa_piR_022437|gb|DQ600690|Homo	NM_001282730.1	205	-51.28	2	26	3619	3645	24	0.8333	0.9583	||||||||||	|||||||:|
3045	uaGGUGGGCGGAGUCGGAGGGUUUCAu	|::||||||||:| ||||||||||	atCTGCCCGCCTCGGGCTCCCAAAGTg	>hsa_piR_022437|gb|DQ600690|Homo	NM_001282731.1	205	-51.28	2	26	3461	3487	24	0.8333	0.9583	||||||||||	|||||||:|
3046	uaGGUGGGCGGAGUCGGAGGGUUUCAu	|::||||||||:| ||||||||||	atCTGCCCGCCTCGGGCTCCCAAAGTg	>hsa_piR_022437|gb|DQ600690|Homo	NM_001282732.1	205	-51.28	2	26	3001	3027	24	0.8333	0.9583	||||||||||	|||||||:|
3047	uaGGUGGGCGGAGUCGGAGGGUUUCAu	|||||| ||||:||||||||||||	atCCACCCCCCTCGGCCTCCCAAAGTg	>hsa_piR_022437|gb|DQ600690|Homo	NM_001282735.1	213	-54.47	2	26	6049	6075	24	0.9167	0.9583	||||||||||	|| ||||:||
3048	uaGGUGGGCGGAGUCGGAGGGUUUCAu	|: ||:||:|::||||||||||||	atCTTCCTGCTTTGGCCTCCCAAAGTg	>hsa_piR_022437|gb|DQ600690|Homo	NM_001282735.1	197	-43.54	2	26	4740	4766	24	0.75	0.9583	||||||||||	|:||:|::||
3049	uaGGUGGGCGGAGUCGGAGGGUUUCAu	||:||| |||| ||||||||||||	atCCGCCCACCTCCGCCTCCCAAAGTg	>hsa_piR_022437|gb|DQ600690|Homo	NM_001282736.2	205	-50.11	2	26	9235	9261	24	0.875	0.9167	||||||||||	|| |||| ||
3050	uaGGUGGGCGGAGUCGGAGGGUUUCAu	|||||| ||||:||||||||||||	atCCACCCCCCTCGGCCTCCCAAAGTg	>hsa_piR_022437|gb|DQ600690|Homo	NM_001282743.1	213	-54.47	2	26	5988	6014	24	0.9167	0.9583	||||||||||	|| ||||:||
3051	uaGGUGGGCGGAGUCGGAGGGUUUCAu	|: ||:||:|::||||||||||||	atCTTCCTGCTTTGGCCTCCCAAAGTg	>hsa_piR_022437|gb|DQ600690|Homo	NM_001282743.1	197	-43.54	2	26	4679	4705	24	0.75	0.9583	||||||||||	|:||:|::||
3052	uaGGUGGGCGGAGUCGGAGGGUUUCAu	|||||| ||||:||||||||||||	atCCACCCCCCTCGGCCTCCCAAAGTg	>hsa_piR_022437|gb|DQ600690|Homo	NM_001282744.1	213	-54.47	2	26	5778	5804	24	0.9167	0.9583	||||||||||	|| ||||:||
3053	uaGGUGGGCGGAGUCGGAGGGUUUCAu	|: ||:||:|::||||||||||||	atCTTCCTGCTTTGGCCTCCCAAAGTg	>hsa_piR_022437|gb|DQ600690|Homo	NM_001282744.1	197	-43.54	2	26	4469	4495	24	0.75	0.9583	||||||||||	|:||:|::||
3054	uaGGUGGGCGGAGUCGGAGGGUUUCAu	|||||| |||||||||||||||||	atCCACCCCCCTCAGCCTCCCAAAGTg	>hsa_piR_022437|gb|DQ600690|Homo	NM_001282852.1	217	-55.12	2	26	4480	4506	24	0.9583	0.9583	||||||||||	|| |||||||
3055	uaGGUGGGCGGAGUCGGAGGGUUUCAu	|||||| |||||||||||||||||	atCCACCCCCCTCAGCCTCCCAAAGTg	>hsa_piR_022437|gb|DQ600690|Homo	NM_001282853.1	217	-55.12	2	26	4618	4644	24	0.9583	0.9583	||||||||||	|| |||||||
3056	uaGGUGGGCGGAGUCGGAGGGUUUCAu	|||||| |||||||||||||||||	atCCACCCCCCTCAGCCTCCCAAAGTg	>hsa_piR_022437|gb|DQ600690|Homo	NM_001282854.2	217	-55.12	2	26	4783	4809	24	0.9583	0.9583	||||||||||	|| |||||||
3057	uaGGUGGGCGGAGUCGGAGGGUUUCAu	|::||||||||:||||||||||||	atCTGCCCGCCTCGGCCTCCCAAAGTg	>hsa_piR_022437|gb|DQ600690|Homo	NM_001282867.1	213	-56.02	2	26	1870	1896	24	0.875	1	||||||||||	|||||||:||
3058	uaGGUGGGCGGAGUCGGAGGGUUUCAu	| :||:|||||:||||||||||||	atCAGCCTGCCTCGGCCTCCCAAAGTg	>hsa_piR_022437|gb|DQ600690|Homo	NM_001282867.1	205	-50.85	2	26	2282	2308	24	0.8333	0.9583	||||||||||	|:|||||:||
3059	uaGGUGGGCGGAGUCGGAGGGUUUCAu	|::||||||||:||||||||||||	atCTGCCCGCCTCGGCCTCCCAAAGTg	>hsa_piR_022437|gb|DQ600690|Homo	NM_001282868.1	213	-56.02	2	26	1666	1692	24	0.875	1	||||||||||	|||||||:||
3060	uaGGUGGGCGGAGUCGGAGGGUUUCAu	| :||:|||||:||||||||||||	atCAGCCTGCCTCGGCCTCCCAAAGTg	>hsa_piR_022437|gb|DQ600690|Homo	NM_001282868.1	205	-50.85	2	26	2078	2104	24	0.8333	0.9583	||||||||||	|:|||||:||
3061	uaGGUGGGCGGAGUCGGAGGGUUUCAu	|::||||||||:||||||||||||	atCTGCCCGCCTCGGCCTCCCAAAGTg	>hsa_piR_022437|gb|DQ600690|Homo	NM_001282869.2	213	-56.02	2	26	1697	1723	24	0.875	1	||||||||||	|||||||:||
3062	uaGGUGGGCGGAGUCGGAGGGUUUCAu	| :||:|||||:||||||||||||	atCAGCCTGCCTCGGCCTCCCAAAGTg	>hsa_piR_022437|gb|DQ600690|Homo	NM_001282869.2	205	-50.85	2	26	2109	2135	24	0.8333	0.9583	||||||||||	|:|||||:||
3063	uaGGUGGGCGGAGUCGGAGGGUUUCAu	|::||||||||:||||||||||||	atCTGCCCGCCTCGGCCTCCCAAAGTg	>hsa_piR_022437|gb|DQ600690|Homo	NM_001282870.1	213	-56.02	2	26	1800	1826	24	0.875	1	||||||||||	|||||||:||
3064	uaGGUGGGCGGAGUCGGAGGGUUUCAu	| :||:|||||:||||||||||||	atCAGCCTGCCTCGGCCTCCCAAAGTg	>hsa_piR_022437|gb|DQ600690|Homo	NM_001282870.1	205	-50.85	2	26	2212	2238	24	0.8333	0.9583	||||||||||	|:|||||:||
3065	uaGGUGGGCGGAGUCGGAGGGUUUCAu	|::||||||||:||||||||||||	atCTGCCCGCCTCGGCCTCCCAAAGTg	>hsa_piR_022437|gb|DQ600690|Homo	NM_001282871.2	213	-56.02	2	26	1867	1893	24	0.875	1	||||||||||	|||||||:||
3066	uaGGUGGGCGGAGUCGGAGGGUUUCAu	| :||:|||||:||||||||||||	atCAGCCTGCCTCGGCCTCCCAAAGTg	>hsa_piR_022437|gb|DQ600690|Homo	NM_001282871.2	205	-50.85	2	26	2279	2305	24	0.8333	0.9583	||||||||||	|:|||||:||
3067	uaGGUGGGCGGAGUCGGAGGGUUUCAu	|::||||||||:||||||||||||	atCTGCCCGCCTCGGCCTCCCAAAGTg	>hsa_piR_022437|gb|DQ600690|Homo	NM_001282872.1	213	-56.02	2	26	1970	1996	24	0.875	1	||||||||||	|||||||:||
3068	uaGGUGGGCGGAGUCGGAGGGUUUCAu	| :||:|||||:||||||||||||	atCAGCCTGCCTCGGCCTCCCAAAGTg	>hsa_piR_022437|gb|DQ600690|Homo	NM_001282872.1	205	-50.85	2	26	2382	2408	24	0.8333	0.9583	||||||||||	|:|||||:||
3069	uaGGUGGGCGGAGUCGGAGGGUUUCAu	:||||:|||||:||||||||||||	atTCACCTGCCTCGGCCTCCCAAAGTg	>hsa_piR_022437|gb|DQ600690|Homo	NM_001282904.1	213	-55.55	2	26	3876	3902	24	0.875	1	||||||||||	|:|||||:||
3070	uaGGUGGGCGG-AGUC--GGAGGGUUUCAu	:|||| ||| ||| |||||||||||	ggTCACCAGCCACCAGCTCCTCCCAAAGTg	>hsa_piR_022437|gb|DQ600690|Homo	NM_001282916.1	183	-38.42	2	26	979	1008	27	0.7778	0.8148	||||||||||	|| ||| |
3071	uaGGUGGGCGG-AGUC--GGAGGGUUUCAu	:|||| ||| ||| |||||||||||	ggTCACCAGCCACCAGCTCCTCCCAAAGTg	>hsa_piR_022437|gb|DQ600690|Homo	NM_001282919.1	183	-38.42	2	26	1009	1038	27	0.7778	0.8148	||||||||||	|| ||| |
3072	uaGGUGGGCGGAGUCGGAGGGUUUCAu	|::||| |||||||||||||||||	atCTGCCCACCTCAGCCTCCCAAAGTg	>hsa_piR_022437|gb|DQ600690|Homo	NM_001282929.1	209	-50.83	2	26	3882	3908	24	0.875	0.9583	||||||||||	|| |||||||
3073	uaGGUGGGCGGAGUCGGAGGGUUUCAu	|::||| |||||||||||||||||	atCTGCCCACCTCAGCCTCCCAAAGTg	>hsa_piR_022437|gb|DQ600690|Homo	NM_001282930.2	209	-50.83	2	26	3869	3895	24	0.875	0.9583	||||||||||	|| |||||||
3074	uaGGUGGGCGGAGUCGGAGGGUUUCAu	|::||| |||||||||||||||||	atCTGCCCACCTCAGCCTCCCAAAGTg	>hsa_piR_022437|gb|DQ600690|Homo	NM_001282931.2	209	-50.83	2	26	4160	4186	24	0.875	0.9583	||||||||||	|| |||||||
3075	uaGGUGGGCGGAGUCGGAGGGUUUCAu	|||:|:|||||:||||||||||||	atCCATCTGCCTCGGCCTCCCAAAGTg	>hsa_piR_022437|gb|DQ600690|Homo	NM_001282962.1	213	-56.03	2	26	2662	2688	24	0.875	1	||||||||||	|:|||||:||
3076	uaGGUGGGCGGAGUCGGAGGGUUUCAu	|||:|:|||||:||||||||||||	atCCATCTGCCTCGGCCTCCCAAAGTg	>hsa_piR_022437|gb|DQ600690|Homo	NM_001282963.1	213	-56.03	2	26	2569	2595	24	0.875	1	||||||||||	|:|||||:||
3077	uaGGUGGGCGGAGUCGGAGGGUUUCAu	||:||:||||::||||||||||||	atCCGCCTGCCTTGGCCTCCCAAAGTg	>hsa_piR_022437|gb|DQ600690|Homo	NM_001283049.2	209	-53.63	2	26	15143	15169	24	0.8333	1	||||||||||	|:||||::||
3078	uaGGUGGGCGGAGUCGGAGGGUUUCAu	|||||:||||| |||||||||||	atCCACCTGCCTCCACCTCCCAAAGTg	>hsa_piR_022437|gb|DQ600690|Homo	NM_001283049.2	205	-51.27	2	26	6735	6761	24	0.875	0.9167	||||||||||	|:||||| |
3079	uaGGUGGGCGGAGUCGGAGGGUUUCAu	|| ||| |:||:||||||||||||	atCCTCCCACTTCGGCCTCCCAAAGTt	>hsa_piR_022437|gb|DQ600690|Homo	NM_001283049.2	201	-46.6	2	26	6472	6498	24	0.8333	0.9167	||||||||||	|| |:||:||
3080	uaGGUGGGCGGAGUCGGAGGGUUUCAu	|::||| ||||: |||||||||||	atCTGCCCACCTCGACCTCCCAAAGTg	>hsa_piR_022437|gb|DQ600690|Homo	NM_001283051.2	197	-44.88	2	26	5236	5262	24	0.7917	0.9167	||||||||||	|| ||||: |
3081	uaGGUGGGCGGAGUCGGAGGGUUUCAu	|::||| ||||: |||||||||||	atCTGCCCACCTCGACCTCCCAAAGTg	>hsa_piR_022437|gb|DQ600690|Homo	NM_001283052.2	197	-44.88	2	26	5435	5461	24	0.7917	0.9167	||||||||||	|| ||||: |
3082	uaGGUGGGCGGAGUCGGAGGGUUUCAu	|||||:|||||:||||||||||||	atCCACCTGCCTCGGCCTCCCAAAGTg	>hsa_piR_022437|gb|DQ600690|Homo	NM_001283106.2	217	-58.38	2	26	2099	2125	24	0.9167	1	||||||||||	|:|||||:||
3083	uaGGUGGGCGGAGUCGGAGGGUUUCAu	|||||:|||||:||||||||||||	atCCACCTGCCTCGGCCTCCCAAAGTg	>hsa_piR_022437|gb|DQ600690|Homo	NM_001283116.2	217	-58.38	2	26	1853	1879	24	0.9167	1	||||||||||	|:|||||:||
3084	uaGGUGGGCGGAGUCGGAGGGUUUCAu	|||||:|||||:||||||||||||	atCCACCTGCCTCGGCCTCCCAAAGTg	>hsa_piR_022437|gb|DQ600690|Homo	NM_001283129.2	217	-58.38	2	26	2093	2119	24	0.9167	1	||||||||||	|:|||||:||
3085	uaGGUGGGCGGAGUCGGAGGGUUUCAu	|||||:|||||:||||||||||||	atCCACCTGCCTCGGCCTCCCAAAGTg	>hsa_piR_022437|gb|DQ600690|Homo	NM_001283148.2	217	-58.38	2	26	1851	1877	24	0.9167	1	||||||||||	|:|||||:||
3086	uaGGUGGGCGGAGUCGGAGGGUUUCAu	|||||:|||||:||||||||||||	atCCACCTGCCTCGGCCTCCCAAAGTg	>hsa_piR_022437|gb|DQ600690|Homo	NM_001283154.2	217	-58.38	2	26	1963	1989	24	0.9167	1	||||||||||	|:|||||:||
3087	uaGGUGGGCGGAGUCGGAGGGUUUCAu	|||||:|||||:||||||||||||	atCCACCTGCCTCGGCCTCCCAAAGTg	>hsa_piR_022437|gb|DQ600690|Homo	NM_001283179.2	217	-58.38	2	26	1794	1820	24	0.9167	1	||||||||||	|:|||||:||
3088	uaGGUGGGCGGAGUCGGAGGGUUUCAu	|||||:|||||:||||||||||||	atCCACCTGCCTCGGCCTCCCAAAGTg	>hsa_piR_022437|gb|DQ600690|Homo	NM_001283186.2	217	-58.38	2	26	1667	1693	24	0.9167	1	||||||||||	|:|||||:||
3089	uaGGUGGGCGGAGUCGGAGGGUUUCAu	|||||:|||||:||||||||||||	atCCACCTGCCTCGGCCTCCCAAAGTg	>hsa_piR_022437|gb|DQ600690|Homo	NM_001283199.2	217	-58.38	2	26	1740	1766	24	0.9167	1	||||||||||	|:|||||:||
3090	uaGGUGGGCGGAGUCGGAGGGUUUCAu	|||||:|||||:||||||||||||	atCCACCTGCCTCGGCCTCCCAAAGTg	>hsa_piR_022437|gb|DQ600690|Homo	NM_001283215.2	217	-58.38	2	26	1834	1860	24	0.9167	1	||||||||||	|:|||||:||
3091	uaGGUGGGCGGAGUCGGAGGGUUUCAu	|||||:|||||:||||||||||||	atCCACCTGCCTCGGCCTCCCAAAGTg	>hsa_piR_022437|gb|DQ600690|Homo	NM_001283235.2	217	-58.38	2	26	1738	1764	24	0.9167	1	||||||||||	|:|||||:||
3092	uaGGUGGGCGGAGUCGGAGGGUUUCAu	|||||:|||||:||||||||||||	atCCACCTGCCTCGGCCTCCCAAAGTg	>hsa_piR_022437|gb|DQ600690|Homo	NM_001283248.2	217	-58.38	2	26	1513	1539	24	0.9167	1	||||||||||	|:|||||:||
3093	uaGGUGGGCGGAGUCGGAGGGUUUCAu	|||||:|:|||:||||||||||||	atCCACCTGTCTCGGCCTCCCAAAGTg	>hsa_piR_022437|gb|DQ600690|Homo	NM_001284233.4	213	-56.09	2	26	7055	7081	24	0.875	1	||||||||||	|:|:|||:||
3094	uaGGUGGGCGGAGUCGGAGGGUUUCAu	|||||:|:|||:||||||||||||	atCCACCTGTCTCGGCCTCCCAAAGTg	>hsa_piR_022437|gb|DQ600690|Homo	NM_001284234.3	213	-56.09	2	26	6933	6959	24	0.875	1	||||||||||	|:|:|||:||
3095	uaGGUGGGCGGAGUCGGAGGGUUUCAu	|::||:||:||:||||||||||||	atCTGCCTGCTTCGGCCTCCCAAAGTg	>hsa_piR_022437|gb|DQ600690|Homo	NM_001284236.3	205	-50.28	2	26	10534	10560	24	0.7917	1	||||||||||	|:||:||:||
3096	uaGGUGGGCGGAGUCGGAGGGUUUCAu	|::||:|||| :||||||||||||	atCTGCCTGCCTGGGCCTCCCAAAGTg	>hsa_piR_022437|gb|DQ600690|Homo	NM_001284236.3	201	-48.61	2	26	9486	9512	24	0.7917	0.9583	||||||||||	|:|||| :||
3097	uaGGUGGGCGGAGUCGGAGGGUUUCAu	|||||:|:|||:||||||||||||	atCCACCTGTCTCGGCCTCCCAAAGTg	>hsa_piR_022437|gb|DQ600690|Homo	NM_001284238.3	213	-56.09	2	26	7432	7458	24	0.875	1	||||||||||	|:|:|||:||
3098	uaGGUGGGCGGAGUCGGAGGGUUUCAu	|||||:|||||:||||||||||||	atCCACCTGCCTCGGCCTCCCAAAGTg	>hsa_piR_022437|gb|DQ600690|Homo	NM_001284251.1	217	-58.38	2	26	2601	2627	24	0.9167	1	||||||||||	|:|||||:||
3099	uaGGUGGGCGGAGUCGGAGGGUUUCAu	|||||:|||||:||||||||||||	atCCACCTGCCTCGGCCTCCCAAAGTg	>hsa_piR_022437|gb|DQ600690|Homo	NM_001284252.2	217	-58.38	2	26	2557	2583	24	0.9167	1	||||||||||	|:|||||:||
3100	uaGGUGGGCGGAGUCGGAGGGUUUCAu	|||||:|||||:||||||||||||	atCCACCTGCCTCGGCCTCCCAAAGTg	>hsa_piR_022437|gb|DQ600690|Homo	NM_001284253.2	217	-58.38	2	26	2428	2454	24	0.9167	1	||||||||||	|:|||||:||
3101	uaGGUGGGCGGAGUCGGAGGGUUUCAu	|||||:|||||:||||||||||||	atCCACCTGCCTCGGCCTCCCAAAGTg	>hsa_piR_022437|gb|DQ600690|Homo	NM_001284254.2	217	-58.38	2	26	2467	2493	24	0.9167	1	||||||||||	|:|||||:||
3102	uaGGUGGGCGGAGUCGGAGGGUUUCAu	|||||:|||||:||||||||||||	atCCACCTGCCTCGGCCTCCCAAAGTg	>hsa_piR_022437|gb|DQ600690|Homo	NM_001284255.2	217	-58.38	2	26	2338	2364	24	0.9167	1	||||||||||	|:|||||:||
3103	uaGGUGGGCGGAGUCGGAGGGUUUCAu	|||||:|||||:||||||||||||	atCCACCTGCCTCGGCCTCCCAAAGTg	>hsa_piR_022437|gb|DQ600690|Homo	NM_001284256.2	217	-58.38	2	26	2228	2254	24	0.9167	1	||||||||||	|:|||||:||
3104	uaGGUGGGCGGAGUCGGAGGGUUUCAu	|||||:|||||:||||||||||||	atCCACCTGCCTCGGCCTCCCAAAGTg	>hsa_piR_022437|gb|DQ600690|Homo	NM_001284257.2	217	-58.38	2	26	2225	2251	24	0.9167	1	||||||||||	|:|||||:||
3105	uaGGUGGGCGGAGUCGGAGGGUUUCAu	||::|:|||||:||||||||||||	atCCGTCTGCCTCGGCCTCCCAAAGTg	>hsa_piR_022437|gb|DQ600690|Homo	NM_001284267.1	209	-55.14	2	26	2252	2278	24	0.8333	1	||||||||||	|:|||||:||
3106	uaGGUGGGCGGAGUCGGAGGGUUUCAu	||::|:|||||:||||||||||||	atCCGTCTGCCTCGGCCTCCCAAAGTg	>hsa_piR_022437|gb|DQ600690|Homo	NM_001284269.2	209	-55.14	2	26	2389	2415	24	0.8333	1	||||||||||	|:|||||:||
3107	uaGGUGGGCGGAGUCGGAGGGUUUCAu	|::||:||||||||||||||||||	atCTGCCTGCCTCAGCCTCCCAAAGTg	>hsa_piR_022437|gb|DQ600690|Homo	NM_001284313.2	213	-53.87	2	26	3763	3789	24	0.875	1	||||||||||	|:||||||||
3108	uaGGUGGGCGGAGUCGGAGGGUUUCAu	||:||| |||::||||||||||||	atCCGCCCACCTTGGCCTCCCAAAGTg	>hsa_piR_022437|gb|DQ600690|Homo	NM_001284341.1	205	-50.59	2	26	3044	3070	24	0.8333	0.9583	||||||||||	|| |||::||
3109	uaGGUGGGCGGAGUCGGAGGGUUUCAu	||:||| |||::||||||||||||	atCCGCCCACCTTGGCCTCCCAAAGTg	>hsa_piR_022437|gb|DQ600690|Homo	NM_001284343.1	205	-50.59	2	26	2122	2148	24	0.8333	0.9583	||||||||||	|| |||::||
3110	uaGGUGGGCGGAGUCGGAGGGUUUCAu	|||||| ||||:||||||||||||	atCCACCCACCTCGGCCTCCCAAAGTg	>hsa_piR_022437|gb|DQ600690|Homo	NM_001284352.2	213	-55.34	2	26	6263	6289	24	0.9167	0.9583	||||||||||	|| ||||:||
3111	uaGGUGGGCGGAGUCGGAGGGUUUCAu	|||||| ||||:||||||||||||	atCCACCCACCTCGGCCTCCCAAAGTg	>hsa_piR_022437|gb|DQ600690|Homo	NM_001284353.1	213	-55.34	2	26	6365	6391	24	0.9167	0.9583	||||||||||	|| ||||:||
3112	uaGGUGGGCGGAGUCGGAGGGUUUCAu	||||||||||::||||||||||||	atCCACCCGCCTTGGCCTCCCAAAGTg	>hsa_piR_022437|gb|DQ600690|Homo	NM_001284357.1	217	-56.9	2	26	448	474	24	0.9167	1	||||||||||	||||||::||
3113	uaGGUGGGCGGAGUCGGAGGGUUUCAu	||:| ||||||:||||||||||||	atCCGCACGCCTCGGCCTCCCAAAGTg	>hsa_piR_022437|gb|DQ600690|Homo	NM_001284400.3	209	-53.28	2	26	2262	2288	24	0.875	0.9583	||||||||||	||||||:||
3114	uaGGUGGGCGGAGUCGGAGGGUUUCAu	|::||:||||::||||||||||||	atCTGCCTGCCTTGGCCTCCCAAAGTg	>hsa_piR_022437|gb|DQ600690|Homo	NM_001284403.2	205	-48.94	2	26	3349	3375	24	0.7917	1	||||||||||	|:||||::||
3115	uaGGUGGGCGGAGUCGGAGGGUUUCAu	:| ||| |||||||||||||||||	atTCTCCCACCTCAGCCTCCCAAAGTg	>hsa_piR_022437|gb|DQ600690|Homo	NM_001284498.2	205	-48.77	2	26	4757	4783	24	0.875	0.9167	||||||||||	|| |||||||
3116	uaGGUGGGCGGAGUCGGAGGGUUUCAu	:| ||| |||||||||||||||||	atTCTCCCACCTCAGCCTCCCAAAGTg	>hsa_piR_022437|gb|DQ600690|Homo	NM_001284499.1	205	-48.77	2	26	4157	4183	24	0.875	0.9167	||||||||||	|| |||||||
3117	uaGGUGGGCGGAGUCGGAGGGUUUCAu	||:||||:||||||||||||||||	atCCGCCCGTCTCAGCCTCCCAAAGTg	>hsa_piR_022437|gb|DQ600690|Homo	NM_001284501.2	217	-59.07	2	26	133	159	24	0.9167	1	||||||||||	|||:||||||
3118	uaGGUGGGCGGAGUCGGAGGGUUUCAu	|::||| |||||||||||||||||	atCTGCCCACCTCAGCCTCCCAAAGTg	>hsa_piR_022437|gb|DQ600690|Homo	NM_001284514.1	209	-50.83	2	26	6579	6605	24	0.875	0.9583	||||||||||	|| |||||||
3119	uaGGUGGGCGGAGUCGGAGGGUUUCAu	|::||| |||||||||||||||||	atCTGCCCACCTCAGCCTCCCAAAGTg	>hsa_piR_022437|gb|DQ600690|Homo	NM_001284514.1	209	-50.83	2	26	8314	8340	24	0.875	0.9583	||||||||||	|| |||||||
3120	uaGGUGGGCGGAGUCGGAGGGUUUCAu	|::||| |||||||||||||||||	atCTGCCCACCTCAGCCTCCCAAAGTg	>hsa_piR_022437|gb|DQ600690|Homo	NM_001284515.2	209	-50.83	2	26	6535	6561	24	0.875	0.9583	||||||||||	|| |||||||
3121	uaGGUGGGCGGAGUCGGAGGGUUUCAu	|::||| |||||||||||||||||	atCTGCCCACCTCAGCCTCCCAAAGTg	>hsa_piR_022437|gb|DQ600690|Homo	NM_001284515.2	209	-50.83	2	26	8270	8296	24	0.875	0.9583	||||||||||	|| |||||||
3122	uaGGUGGGCGGAGUCGGAGGGUUUCAu	|::||| |||||||||||||||||	atCTGCCCACCTCAGCCTCCCAAAGTg	>hsa_piR_022437|gb|DQ600690|Homo	NM_001284516.1	209	-50.83	2	26	6023	6049	24	0.875	0.9583	||||||||||	|| |||||||
3123	uaGGUGGGCGGAGUCGGAGGGUUUCAu	|::||| |||||||||||||||||	atCTGCCCACCTCAGCCTCCCAAAGTg	>hsa_piR_022437|gb|DQ600690|Homo	NM_001284516.1	209	-50.83	2	26	7758	7784	24	0.875	0.9583	||||||||||	|| |||||||
3124	uaGGUGGGCGGAGUCGGAGGGUUUCAu	|||||||||||:||||||||||||	atCCACCCGCCTCGGCCTCCCAAAGTg	>hsa_piR_022437|gb|DQ600690|Homo	NM_001285486.2	221	-61.18	2	26	155	181	24	0.9583	1	||||||||||	|||||||:||
3125	uaGGUGGGCGGAGUCGGAGGGUUUCAu	||:||||||||:||||||||||||	atCCGCCCGCCTCGGCCTCCCAAAGTg	>hsa_piR_022437|gb|DQ600690|Homo	NM_001285522.1	217	-60.71	2	26	8092	8118	24	0.9167	1	||||||||||	|||||||:||
3126	uaGGUGGGCGGAGUCGGAGGGUUUCAu	|::||:|||||:||||||||||||	atCTGCCTGCCTCGGCCTCCCAAAGTg	>hsa_piR_022437|gb|DQ600690|Homo	NM_001285522.1	209	-53.22	2	26	12458	12484	24	0.8333	1	||||||||||	|:|||||:||
3127	uaGGUGGGCGGAGUCGGAGGGUUUCAu	||:||||||||:||||||||||||	atCCGCCCGCCTCGGCCTCCCAAAGTg	>hsa_piR_022437|gb|DQ600690|Homo	NM_001285524.1	217	-60.71	2	26	8861	8887	24	0.9167	1	||||||||||	|||||||:||
3128	uaGGUGGGCGGAGUCGGAGGGUUUCAu	|::||:|||||:||||||||||||	atCTGCCTGCCTCGGCCTCCCAAAGTg	>hsa_piR_022437|gb|DQ600690|Homo	NM_001285524.1	209	-53.22	2	26	13227	13253	24	0.8333	1	||||||||||	|:|||||:||
3129	uaGGUGGGCGGAGUCGGAGGGUUUCAu	||:||||||||:||||||||||||	atCCGCCCGCCTCGGCCTCCCAAAGTg	>hsa_piR_022437|gb|DQ600690|Homo	NM_001285526.1	217	-60.71	2	26	9512	9538	24	0.9167	1	||||||||||	|||||||:||
3130	uaGGUGGGCGGAGUCGGAGGGUUUCAu	|::||:|||||:||||||||||||	atCTGCCTGCCTCGGCCTCCCAAAGTg	>hsa_piR_022437|gb|DQ600690|Homo	NM_001285526.1	209	-53.22	2	26	13878	13904	24	0.8333	1	||||||||||	|:|||||:||
3131	uaGGUGGGCGGAGUCGGAGGGUUUCAu	||||||||||||||||||||||||	gtCCACCCGCCTCAGCCTCCCAAAGTg	>hsa_piR_022437|gb|DQ600690|Homo	NM_001285549.2	225	-61.52	2	26	8444	8470	24	1	1	||||||||||	||||||||||
3132	uaGGUGGGCGGAGUCGGAGGGUUUCAu	|::||| ||||:||||||||||||	atCTGCCCACCTCGGCCTCCCAAAGTg	>hsa_piR_022437|gb|DQ600690|Homo	NM_001285986.1	205	-50.18	2	26	732	758	24	0.8333	0.9583	||||||||||	|| ||||:||
3133	uaGGUGGGCGGAGUCGGAGGGUUUCAu	|::||| ||||:||||||||||||	atCTGCCCACCTCGGCCTCCCAAAGTg	>hsa_piR_022437|gb|DQ600690|Homo	NM_001285987.1	205	-50.18	2	26	732	758	24	0.8333	0.9583	||||||||||	|| ||||:||
3134	uaGGUGGGCGGAGUCGGAGGGUUUCAu	|||||| ||||:||||||||||||	atCCACCCACCTCGGCCTCCCAAAGTg	>hsa_piR_022437|gb|DQ600690|Homo	NM_001286052.1	213	-55.34	2	26	2563	2589	24	0.9167	0.9583	||||||||||	|| ||||:||
3135	uaGGUGGGCGGAGUCGGAGGGUUUCAu	|||||| ||||:||||||||||||	atCCACCCACCTCGGCCTCCCAAAGTg	>hsa_piR_022437|gb|DQ600690|Homo	NM_001286053.1	213	-55.34	2	26	2436	2462	24	0.9167	0.9583	||||||||||	|| ||||:||
3136	uaGGUGGGCGGAGUCGGAGGGUUUCAu	|||||| ||||:||||||||||||	atCCACCCACCTCGGCCTCCCAAAGTg	>hsa_piR_022437|gb|DQ600690|Homo	NM_001286054.1	213	-55.34	2	26	2760	2786	24	0.9167	0.9583	||||||||||	|| ||||:||
3137	uaGGUGGGCGGAGUCGGAGGGUUUCAu	|: ||:|||||:||||||||||||	atCTTCCTGCCTCGGCCTCCCAAAGTg	>hsa_piR_022437|gb|DQ600690|Homo	NM_001286067.2	205	-50.76	2	26	3599	3625	24	0.8333	0.9583	||||||||||	|:|||||:||
3138	uaGGUGGGCGGAGUCGGAGGGUUUCAu	|: ||:|||||:||||||||||||	atCTTCCTGCCTCGGCCTCCCAAAGTg	>hsa_piR_022437|gb|DQ600690|Homo	NM_001286068.2	205	-50.76	2	26	3462	3488	24	0.8333	0.9583	||||||||||	|:|||||:||
3139	uaGGUGGGCGGAGUCGGAGGGUUUCAu	|: ||:|||||:||||||||||||	atCTTCCTGCCTCGGCCTCCCAAAGTg	>hsa_piR_022437|gb|DQ600690|Homo	NM_001286069.2	205	-50.76	2	26	3467	3493	24	0.8333	0.9583	||||||||||	|:|||||:||
3140	uaGGUGGGCGGAGUCGGAGGGUUUCAu	||:||| |||::||||||||||||	atCCGCCCACCTTGGCCTCCCAAAGTg	>hsa_piR_022437|gb|DQ600690|Homo	NM_001286104.2	205	-50.59	2	26	1977	2003	24	0.8333	0.9583	||||||||||	|| |||::||
3141	uagguGGGCGGAGUCGGAGGGUUUCAu	||:||||::||||||||||||	gcagtCCTGCCTTGGCCTCCCAAAGTa	>hsa_piR_022437|gb|DQ600690|Homo	NM_001286104.2	198	-44.73	2	23	2568	2594	21	0.8571	1	||||||||||	|:||||::||
3142	uaGGUGGGCGGAGUCGGAGGGUUUCAu	||:||| |||::||||||||||||	atCCGCCCACCTTGGCCTCCCAAAGTg	>hsa_piR_022437|gb|DQ600690|Homo	NM_001286105.2	205	-50.59	2	26	2074	2100	24	0.8333	0.9583	||||||||||	|| |||::||
3143	uagguGGGCGGAGUCGGAGGGUUUCAu	||:||||::||||||||||||	gcagtCCTGCCTTGGCCTCCCAAAGTa	>hsa_piR_022437|gb|DQ600690|Homo	NM_001286105.2	198	-44.73	2	23	2665	2691	21	0.8571	1	||||||||||	|:||||::||
3144	uaGGUGGGCGGAGUCGGAGGGUUUCAu	||:||| |||::||||||||||||	atCCGCCCACCTTGGCCTCCCAAAGTg	>hsa_piR_022437|gb|DQ600690|Homo	NM_001286110.2	205	-50.59	2	26	2154	2180	24	0.8333	0.9583	||||||||||	|| |||::||
3145	uagguGGGCGGAGUCGGAGGGUUUCAu	||:||||::||||||||||||	gcagtCCTGCCTTGGCCTCCCAAAGTa	>hsa_piR_022437|gb|DQ600690|Homo	NM_001286110.2	198	-44.73	2	23	2745	2771	21	0.8571	1	||||||||||	|:||||::||
3146	uaGGUGGGCGGAGUCGGAGGGUUUCAu	||:||: |||||||||||||||||	atCCGCCTACCTCAGCCTCCCAAAGTg	>hsa_piR_022437|gb|DQ600690|Homo	NM_001286137.2	209	-52.57	2	26	1595	1621	24	0.875	0.9583	||||||||||	|: |||||||
3147	uaGGUGGGCGGAGUCGGAGGGUUUCAu	|:::|:|||||:| ||||||||||	atCTGTCTGCCTCGGACTCCCAAAGTg	>hsa_piR_022437|gb|DQ600690|Homo	NM_001286149.2	197	-45.1	2	26	1798	1824	24	0.75	0.9583	||||||||||	|:|||||:|
3148	uaGGUGGGCGGAGUCGGAGGGUUUCAu	|:::|:|||||:| ||||||||||	atCTGTCTGCCTCGGACTCCCAAAGTg	>hsa_piR_022437|gb|DQ600690|Homo	NM_001286150.1	197	-45.1	2	26	1883	1909	24	0.75	0.9583	||||||||||	|:|||||:|
3149	uaGGUGGGCGGAGUCGGAGGGUUUCAu	|:::|:|||||:| ||||||||||	atCTGTCTGCCTCGGACTCCCAAAGTg	>hsa_piR_022437|gb|DQ600690|Homo	NM_001286151.1	197	-45.1	2	26	1905	1931	24	0.75	0.9583	||||||||||	|:|||||:|
3150	uaGGUGGGCGGAGUCGGAGGGUUUCAu	|||||:|||||:||||||||||||	atCCACCTGCCTCGGCCTCCCAAAGTg	>hsa_piR_022437|gb|DQ600690|Homo	NM_001286152.2	217	-58.38	2	26	1730	1756	24	0.9167	1	||||||||||	|:|||||:||
3151	uaGGUGGGCGGAGUCGGAGGGUUUCAu	||:||:||||||||||||||||||	atCCGCCTGCCTCAGCCTCCCAAAGTg	>hsa_piR_022437|gb|DQ600690|Homo	NM_001286198.2	217	-58.56	2	26	214	240	24	0.9167	1	||||||||||	|:||||||||
3152	uaGGUGGGCGGAGUCGGAGGGUUUCAu	|::||:||||||||||||||||||	atCTGCCTGCCTCAGCCTCCCAAAGTg	>hsa_piR_022437|gb|DQ600690|Homo	NM_001286258.1	213	-53.87	2	26	3348	3374	24	0.875	1	||||||||||	|:||||||||
3153	uagGUGGGCGGAGUCGGAGGGUUUCAu	||:::| :| |||||||||||||	gaaCATTTG-TTAAGCCTCCCAAAGTa	>hsa_piR_022437|gb|DQ600690|Homo	NM_001286264.1	182	-35.7	2	25	2478	2503	23	0.7391	0.913	||||||||||	::| :| |||
3154	uagGUGGGCGGAGUCGGAGGGUUUCAu	||:::| :| |||||||||||||	gaaCATTTG-TTAAGCCTCCCAAAGTa	>hsa_piR_022437|gb|DQ600690|Homo	NM_001286266.1	182	-35.7	2	25	2319	2344	23	0.7391	0.913	||||||||||	::| :| |||
3155	uaGGUGGGCGGAGUCGGAGGGUUUCAu	|::||| |||||||||||||||||	atCTGCCCACCTCAGCCTCCCAAAGTg	>hsa_piR_022437|gb|DQ600690|Homo	NM_001286272.1	209	-50.83	2	26	2200	2226	24	0.875	0.9583	||||||||||	|| |||||||
3156	uaGGUGGGCGGAGUCGGAGGGUUUCAu	|::||| |||||||||||||||||	atCTGCCCACCTCAGCCTCCCAAAGTg	>hsa_piR_022437|gb|DQ600690|Homo	NM_001286273.2	209	-50.83	2	26	1860	1886	24	0.875	0.9583	||||||||||	|| |||||||
3157	uaGGUGGGCGGAGUCGGAGGGUUUCAu	||:||||||||:||||||||||||	atCCGCCCGCCTCGGCCTCCCAAAGTg	>hsa_piR_022437|gb|DQ600690|Homo	NM_001286360.1	217	-60.71	2	26	3180	3206	24	0.9167	1	||||||||||	|||||||:||
3158	uaGGUGGGCGGAGUCGGAGGGUUUCAu	||:||||||||:||||||||||||	atCCGCCCGCCTCGGCCTCCCAAAGTg	>hsa_piR_022437|gb|DQ600690|Homo	NM_001286361.1	217	-60.71	2	26	3044	3070	24	0.9167	1	||||||||||	|||||||:||
3159	uaGGUGGGCGGAGUCGGAGGGUUUCAu	|||||| |||||||||||||||||	atCCACCCACCTCAGCCTCCCAAAGTg	>hsa_piR_022437|gb|DQ600690|Homo	NM_001286402.1	217	-55.99	2	26	4146	4172	24	0.9583	0.9583	||||||||||	|| |||||||
3160	uaGGUGGGCGGAGUCGGAGGGUUUCAu	|||||| |||||||||||||||||	atCCACCCACCTCAGCCTCCCAAAGTg	>hsa_piR_022437|gb|DQ600690|Homo	NM_001286403.2	217	-55.99	2	26	2387	2413	24	0.9583	0.9583	||||||||||	|| |||||||
3161	uaGGUGGGCGGAGUCGGAGGGUUUCAu	:| ||:||||||||||||||||||	atTCTCCTGCCTCAGCCTCCCAAAGTg	>hsa_piR_022437|gb|DQ600690|Homo	NM_001286403.2	209	-51.81	2	26	3464	3490	24	0.875	0.9583	||||||||||	|:||||||||
3162	uaGGUGGGCGGAGUCGGAGGGUUUCAu	|::||:||||::||||||||||||	atCTGCCTGCCTTGGCCTCCCAAAGTg	>hsa_piR_022437|gb|DQ600690|Homo	NM_001286403.2	205	-48.94	2	26	4674	4700	24	0.7917	1	||||||||||	|:||||::||
3163	uaGGUGGGCGGAGUCGGAGGGUUUCAu	||:|||||||||||||||||||||	atCCGCCCGCCTCAGCCTCCCAAAGTg	>hsa_piR_022437|gb|DQ600690|Homo	NM_001286479.2	221	-61.36	2	26	3518	3544	24	0.9583	1	||||||||||	||||||||||
3164	uaGGUGGGCGGAGUCGGAGGGUUUCAu	||:|||||||||||||||||||||	atCCGCCCGCCTCAGCCTCCCAAAGTg	>hsa_piR_022437|gb|DQ600690|Homo	NM_001286480.3	221	-61.36	2	26	3626	3652	24	0.9583	1	||||||||||	||||||||||
3165	uaGGUGGGCGGAGUCGGAGGGUUUCAu	|||||:|:||: ||||||||||||	atCCACCTGTCTT-GCCTCCCAAAGTg	>hsa_piR_022437|gb|DQ600690|Homo	NM_001286488.1	199	-49.1	2	26	678	703	24	0.8333	0.9583	||||||||||	|:|:||: ||
3166	uaGGUGGGCGGAGUCGGAGGGUUUCAu	|||||:|:||: ||||||||||||	atCCACCTGTCTT-GCCTCCCAAAGTg	>hsa_piR_022437|gb|DQ600690|Homo	NM_001286489.1	199	-49.1	2	26	576	601	24	0.8333	0.9583	||||||||||	|:|:||: ||
3167	uaGGUGGGCGGAGUCGGAGGGUUUCAu	|:::|:||||||||||||||||||	atCTGTCTGCCTCAGCCTCCCAAAGTg	>hsa_piR_022437|gb|DQ600690|Homo	NM_001286503.1	209	-52.24	2	26	4250	4276	24	0.8333	1	||||||||||	|:||||||||
3168	uaGGUGGGCGGAGUCGGAGGGUUUCAu	|:::|:||||||||||||||||||	atCTGTCTGCCTCAGCCTCCCAAAGTg	>hsa_piR_022437|gb|DQ600690|Homo	NM_001286504.1	209	-52.24	2	26	4243	4269	24	0.8333	1	||||||||||	|:||||||||
3169	uaGGUGGGCGGAGUCGGAGGGUUUCAu	|:::|:||||||||||||||||||	atCTGTCTGCCTCAGCCTCCCAAAGTg	>hsa_piR_022437|gb|DQ600690|Homo	NM_001286505.1	209	-52.24	2	26	4009	4035	24	0.8333	1	||||||||||	|:||||||||
3170	uaGGUGGGCGGAGUCGGAGGGUUUCAu	|::||| ||||:||||||||||||	atCTGCCCACCTCGGCCTCCCAAAGTg	>hsa_piR_022437|gb|DQ600690|Homo	NM_001286531.2	205	-50.18	2	26	2010	2036	24	0.8333	0.9583	||||||||||	|| ||||:||
3171	uaGGUGGGCGGAGUCGGAGGGUUUCAu	|::||| ||||:||||||||||||	atCTGCCCACCTCGGCCTCCCAAAGTg	>hsa_piR_022437|gb|DQ600690|Homo	NM_001286532.2	205	-50.18	2	26	2032	2058	24	0.8333	0.9583	||||||||||	|| ||||:||
3172	uaGGUGGGCGGAGUCGGAGGGUUUCAu	|::||| ||||:||||||||||||	atCTGCCCACCTCGGCCTCCCAAAGTg	>hsa_piR_022437|gb|DQ600690|Homo	NM_001286533.2	205	-50.18	2	26	2188	2214	24	0.8333	0.9583	||||||||||	|| ||||:||
3173	uaGGUGGGCGGAGUCGGAGGGUUUCAu	|::||| ||||:||||||||||||	atCTGCCCACCTCGGCCTCCCAAAGTg	>hsa_piR_022437|gb|DQ600690|Homo	NM_001286534.2	205	-50.18	2	26	2251	2277	24	0.8333	0.9583	||||||||||	|| ||||:||
3174	uaGGUGGGCGGAGUCGGAGGGUUUCAu	|::||| ||||:||||||||||||	atCTGCCCACCTCGGCCTCCCAAAGTg	>hsa_piR_022437|gb|DQ600690|Homo	NM_001286535.2	205	-50.18	2	26	2039	2065	24	0.8333	0.9583	||||||||||	|| ||||:||
3175	uaGGUGGGCGGAGUCGGAGGGUUUCAu	|||||||||||:||||||||||||	agCCACCCGCCTCGGCCTCCCAAAGTg	>hsa_piR_022437|gb|DQ600690|Homo	NM_001286565.1	221	-60.04	2	26	294	320	24	0.9583	1	||||||||||	|||||||:||
3176	uaGGUGGGCGGAGUCGGAGGGUUUCAu	|| ||| |||||||||||||||||	tcCCCCCCACCTCAGCCTCCCAAAGTg	>hsa_piR_022437|gb|DQ600690|Homo	NM_001286565.1	209	-49	2	26	5725	5751	24	0.9167	0.9167	||||||||||	|| |||||||
3177	uaGGUGGGCGGAGUCGGAGGGUUUCAu	|| ||| |||||||||||||||||	tcCCCCCCACCTCAGCCTCCCAAAGTg	>hsa_piR_022437|gb|DQ600690|Homo	NM_001286566.1	209	-49	2	26	5344	5370	24	0.9167	0.9167	||||||||||	|| |||||||
3178	uaGGUGGGCGGAGUCGGAGGGUUUCAu	||:|||||||||||||||||||||	atCCGCCCGCCTCAGCCTCCCAAAGTg	>hsa_piR_022437|gb|DQ600690|Homo	NM_001286655.1	221	-61.36	2	26	139	165	24	0.9583	1	||||||||||	||||||||||
3179	uaGGUGGGCGGAGUCGGAGGGUUUCAu	||||||||||||||||||||||||	atCCACCCGCCTCAGCCTCCCAAAGTg	>hsa_piR_022437|gb|DQ600690|Homo	NM_001286730.2	225	-61.83	2	26	7723	7749	24	1	1	||||||||||	||||||||||
3180	uaGGUGGGCGGAGUCGGAGGGUUUCAu	|::|||||||||||||||||||||	atCTGCCCGCCTCAGCCTCCCAAAGTg	>hsa_piR_022437|gb|DQ600690|Homo	NM_001286748.2	217	-56.67	2	26	1916	1942	24	0.9167	1	||||||||||	||||||||||
3181	uaGGUGGGCGGAGUCGGAGGGUUUCAu	||:||| :|||:||||||||||||	atCCGCCCATCTCGGCCTCCCAAAGTg	>hsa_piR_022437|gb|DQ600690|Homo	NM_001286749.2	205	-52.86	2	26	1919	1945	24	0.8333	0.9583	||||||||||	|| :|||:||
3182	uaGGUGGGCGGAGUCGGAGGGUUUCAu	|::|||||||||||||||||||||	atCTGCCCGCCTCAGCCTCCCAAAGTg	>hsa_piR_022437|gb|DQ600690|Homo	NM_001286751.2	217	-56.67	2	26	1842	1868	24	0.9167	1	||||||||||	||||||||||
3183	uaGGUGGGCGGAGUCGGAGGGUUUCAu	|::|||||||||||||||||||||	atCTGCCCGCCTCAGCCTCCCAAAGTg	>hsa_piR_022437|gb|DQ600690|Homo	NM_001286754.2	217	-56.67	2	26	4719	4745	24	0.9167	1	||||||||||	||||||||||
3184	uaGGUGGGCGGAGUCGGAGGGUUUCAu	|::|||||||||||||||||||||	atCTGCCCGCCTCAGCCTCCCAAAGTg	>hsa_piR_022437|gb|DQ600690|Homo	NM_001286755.1	217	-56.67	2	26	1765	1791	24	0.9167	1	||||||||||	||||||||||
3185	uaGGUGGGCGGAGUCGGAGGGUUUCAu	:|| :||||||||||||||||||	ctTCAGGTGCCTCAGCCTCCCAAAGTg	>hsa_piR_022437|gb|DQ600690|Homo	NM_001286767.2	201	-46.49	2	26	6230	6256	24	0.8333	0.9167	||||||||||	:||||||||
3186	uaGGUGGGCGGAGUCGGAGGGUUUCAu	:|| :||||||||||||||||||	ctTCAGGTGCCTCAGCCTCCCAAAGTg	>hsa_piR_022437|gb|DQ600690|Homo	NM_001286768.2	201	-46.49	2	26	6433	6459	24	0.8333	0.9167	||||||||||	:||||||||
3187	uaGGUGGGCGGAGUCGGAGGGUUUCAu	|| ||: |||::||||||||||||	atCCTCCTTCCTTGGCCTCCCAAAGTg	>hsa_piR_022437|gb|DQ600690|Homo	NM_001286834.3	197	-43.34	2	26	4788	4814	24	0.7917	0.9167	||||||||||	|: |||::||
3188	uaGGUGGGCGGAGUCGGAGGGUUUCAu	|| ||: |||::||||||||||||	atCCTCCTTCCTTGGCCTCCCAAAGTg	>hsa_piR_022437|gb|DQ600690|Homo	NM_001286837.3	197	-43.34	2	26	5026	5052	24	0.7917	0.9167	||||||||||	|: |||::||
3189	uaGGUGGGCGGAGUCGGAGGGUUUCAu	||:||||:||||||||||||||||	atCCGCCCGTCTCAGCCTCCCAAAGTg	>hsa_piR_022437|gb|DQ600690|Homo	NM_001287512.2	217	-59.07	2	26	2404	2430	24	0.9167	1	||||||||||	|||:||||||
3190	uaGGUGGGCGGAGUCGGAGGGUUUCAu	||:||||:||||||||||||||||	atCCGCCCGTCTCAGCCTCCCAAAGTg	>hsa_piR_022437|gb|DQ600690|Homo	NM_001287513.2	217	-59.07	2	26	2726	2752	24	0.9167	1	||||||||||	|||:||||||
3191	uaGGUGGGCGGAGUCGGAGGGUUUCAu	|:||||||||||||||||||||||	gtCTACCCGCCTCAGCCTCCCAAAGTg	>hsa_piR_022437|gb|DQ600690|Homo	NM_001287525.2	221	-58.81	2	26	4078	4104	24	0.9583	1	||||||||||	||||||||||
3192	uaGGUGGGCGGAGUCGGAGGGUUUCAu	||:||||:||||||||||||||||	atCCGCCCGTCTCAGCCTCCCAAAGTg	>hsa_piR_022437|gb|DQ600690|Homo	NM_001287525.2	217	-59.07	2	26	3686	3712	24	0.9167	1	||||||||||	|||:||||||
3193	uaGGUGGGCGGAGUCGGAGGGUUUCAu	|||||: |||::||||||||||||	atCCACCTACCTTGGCCTCCCAAAGTg	>hsa_piR_022437|gb|DQ600690|Homo	NM_001287598.1	205	-48.11	2	26	2216	2242	24	0.8333	0.9583	||||||||||	|: |||::||
3194	uaGGUGGGCGGAGUCGGAGGGUUUCAu	|||||: |||::||||||||||||	atCCACCTACCTTGGCCTCCCAAAGTg	>hsa_piR_022437|gb|DQ600690|Homo	NM_001287599.1	205	-48.11	2	26	2140	2166	24	0.8333	0.9583	||||||||||	|: |||::||
3195	uaGGUGGGCGGAGUCGGAGGGUUUCAu	|||||: |||::||||||||||||	atCCACCTACCTTGGCCTCCCAAAGTg	>hsa_piR_022437|gb|DQ600690|Homo	NM_001287601.1	205	-48.11	2	26	2069	2095	24	0.8333	0.9583	||||||||||	|: |||::||
3196	uaGGUGGGCGGAGUCGGAGGGUUUCAu	||:||| |||::||||||||||||	atCCGCCCACCTTGGCCTCCCAAAGTg	>hsa_piR_022437|gb|DQ600690|Homo	NM_001287740.2	205	-50.59	2	26	2436	2462	24	0.8333	0.9583	||||||||||	|| |||::||
3197	uaGGUGGGCGGAGUCGGAGGGUUUCAu	|::||:||||||||||||||||||	atCTGCCTGCCTCAGCCTCCCAAAGTg	>hsa_piR_022437|gb|DQ600690|Homo	NM_001287811.1	213	-53.87	2	26	4037	4063	24	0.875	1	||||||||||	|:||||||||
3198	uaGGUGGGCGGAGUCGGAGGGUUUCAu	|| :|| |||::||||||||||||	gtCCTTCCACCTTGGCCTCCCAAAGTg	>hsa_piR_022437|gb|DQ600690|Homo	NM_001287811.1	197	-43.83	2	26	4601	4627	24	0.7917	0.9167	||||||||||	|| |||::||
3199	uaGGUGGGCGGAGUCGGAGGGUUUCAu	|::|||||||::||||||||||||	atCTGCCCGCCTTGGCCTCCCAAAGTg	>hsa_piR_022437|gb|DQ600690|Homo	NM_001288579.1	209	-51.74	2	26	2152	2178	24	0.8333	1	||||||||||	||||||::||
3200	uaGGUGGGCGGAGUCGGAGGGUUUCAu	|::|||||||::||||||||||||	atCTGCCCGCCTTGGCCTCCCAAAGTg	>hsa_piR_022437|gb|DQ600690|Homo	NM_001288580.1	209	-51.74	2	26	1858	1884	24	0.8333	1	||||||||||	||||||::||
3201	uaGGUGGGCGGAGUCGGAGGGUUUCAu	|::|||||||::||||||||||||	atCTGCCCGCCTTGGCCTCCCAAAGTg	>hsa_piR_022437|gb|DQ600690|Homo	NM_001288581.1	209	-51.74	2	26	1794	1820	24	0.8333	1	||||||||||	||||||::||
3202	uaGGUGGGCGGAGUCGGAGGGUUUCAu	||||||||||||||||||||||||	atCCACCCGCCTCAGCCTCCCAAAGTg	>hsa_piR_022437|gb|DQ600690|Homo	NM_001288591.2	225	-61.83	2	26	1414	1440	24	1	1	||||||||||	||||||||||
3203	uaGGUGGGCGGAGUCGGAGGGUUUCAu	||||||||||||||||||||||||	atCCACCCGCCTCAGCCTCCCAAAGTg	>hsa_piR_022437|gb|DQ600690|Homo	NM_001288592.2	225	-61.83	2	26	1614	1640	24	1	1	||||||||||	||||||||||
3204	uaGGUGGGCGGAGUCGGAGGGUUUCAu	||:|:|||||||||||||||||||	atCCGCTCGCCTCAGCCTCCCAAAGTt	>hsa_piR_022437|gb|DQ600690|Homo	NM_001288624.1	217	-56.88	2	26	108	134	24	0.9167	1	||||||||||	:|||||||||
3205	uaGGUGGGCGGAGUCGGAGGGUUUCAu	|::||:|||||:||||||||||||	atCTGCCTGCCTCGGCCTCCCAAAGTg	>hsa_piR_022437|gb|DQ600690|Homo	NM_001288642.2	209	-53.22	2	26	2598	2624	24	0.8333	1	||||||||||	|:|||||:||
3206	uaGGUGGGCGGAGUCGGAGGGUUUCAu	|::||:|||||:||||||||||||	atCTGCCTGCCTCGGCCTCCCAAAGTg	>hsa_piR_022437|gb|DQ600690|Homo	NM_001288643.2	209	-53.22	2	26	2439	2465	24	0.8333	1	||||||||||	|:|||||:||
3207	uaGGUGGGCGGAGUCGGAGGGUUUCAu	|::||:|||||:||||||||||||	atCTGCCTGCCTCGGCCTCCCAAAGTg	>hsa_piR_022437|gb|DQ600690|Homo	NM_001288644.2	209	-53.22	2	26	2324	2350	24	0.8333	1	||||||||||	|:|||||:||
3208	uaGGUGGGCGGAGUCGGAGGGUUUCAu	|::||:|||||:||||||||||||	atCTGCCTGCCTCGGCCTCCCAAAGTg	>hsa_piR_022437|gb|DQ600690|Homo	NM_001288645.2	209	-53.22	2	26	2817	2843	24	0.8333	1	||||||||||	|:|||||:||
3209	uaGGUGGGCGGAGUCGGAGGGUUUCAu	|::||:|||||:||||||||||||	atCTGCCTGCCTCGGCCTCCCAAAGTg	>hsa_piR_022437|gb|DQ600690|Homo	NM_001288646.2	209	-53.22	2	26	2730	2756	24	0.8333	1	||||||||||	|:|||||:||
3210	uaGGUGGGCGGAGUCGGAGGGUUUCAu	|::||:|||||:||||||||||||	atCTGCCTGCCTCGGCCTCCCAAAGTg	>hsa_piR_022437|gb|DQ600690|Homo	NM_001288647.2	209	-53.22	2	26	2615	2641	24	0.8333	1	||||||||||	|:|||||:||
3211	uaGGUGGGCGGAGUCGGAGGGUUUCAu	|::||:|||||:||||||||||||	atCTGCCTGCCTCGGCCTCCCAAAGTg	>hsa_piR_022437|gb|DQ600690|Homo	NM_001288648.2	209	-53.22	2	26	2498	2524	24	0.8333	1	||||||||||	|:|||||:||
3212	uaGGUGGGCGGAGUCGGAGGGUUUCAu	|::||:|||||:||||||||||||	atCTGCCTGCCTCGGCCTCCCAAAGTg	>hsa_piR_022437|gb|DQ600690|Homo	NM_001288649.2	209	-53.22	2	26	2319	2345	24	0.8333	1	||||||||||	|:|||||:||
3213	uagGUGGGCGGAGUCGGAGGGUUUCAu	| ||:|:|||:|:||||||||||	gggCTCCTGTCTCGGTCTCCCAAAGTt	>hsa_piR_022437|gb|DQ600690|Homo	NM_001288707.1	196	-43.31	2	25	344	370	23	0.7826	0.9565	||||||||||	|:|:|||:|:
3214	uaGGUGGGCGGAGUCGGAGGGUUUCAu	||:||: ||||:||||||||||||	atCCGCCTTCCTCGGCCTCCCAAAGTg	>hsa_piR_022437|gb|DQ600690|Homo	NM_001288722.2	205	-51.54	2	26	1163	1189	24	0.8333	0.9583	||||||||||	|: ||||:||
3215	uaGGUGGGCGGAGUCGGAGGGUUUCAu	||:||: ||||:||||||||||||	atCCGCCTTCCTCGGCCTCCCAAAGTg	>hsa_piR_022437|gb|DQ600690|Homo	NM_001288723.2	205	-51.54	2	26	1167	1193	24	0.8333	0.9583	||||||||||	|: ||||:||
3216	uaGGUGGGCGGAGUCGGAGGGUUUCAu	:||:||||||||||||||||||||	atTCATCCGCCTCAGCCTCCCAAAGTg	>hsa_piR_022437|gb|DQ600690|Homo	NM_001288726.2	217	-56.65	2	26	1355	1381	24	0.9167	1	||||||||||	||||||||||
3217	uaGGUGGGCGGAGUCGGAGGGUUUCAu	|||||| |||::||||||||||||	atCCACCCACCTTGGCCTCCCAAAGTg	>hsa_piR_022437|gb|DQ600690|Homo	NM_001288811.1	209	-51.06	2	26	836	862	24	0.875	0.9583	||||||||||	|| |||::||
3218	uaGGUGGGCGGAGUCGGAGGGUUUCAu	|||||| |||::||||||||||||	atCCACCCACCTTGGCCTCCCAAAGTg	>hsa_piR_022437|gb|DQ600690|Homo	NM_001288813.1	209	-51.06	2	26	760	786	24	0.875	0.9583	||||||||||	|| |||::||
3219	uaGGUGGGCGGAGUCGGAGGGUUUCAu	||| || |||| ||||||||||||	tcCCA-CCACCTCCGCCTCCCAAAGTg	>hsa_piR_022437|gb|DQ600690|Homo	NM_001288953.2	195	-44.34	2	26	767	792	24	0.875	0.875	||||||||||	|| |||| ||
3220	uaGGUGGGCGGAGUCGGAGGGUUUCAu	||||||||||||||||||||||||	atCCACCCGCCTCAGCCTCCCAAAGTg	>hsa_piR_022437|gb|DQ600690|Homo	NM_001288989.2	225	-61.83	2	26	11718	11744	24	1	1	||||||||||	||||||||||
3221	uaGGUGGGCGGAGUCGGAGGGUUUCAu	:|:||||||||:||||||||||||	atTCGCCCGCCTCGGCCTCCCAAAGTg	>hsa_piR_022437|gb|DQ600690|Homo	NM_001288996.2	213	-57.88	2	26	3531	3557	24	0.875	1	||||||||||	|||||||:||
3222	uaGGUGGGCGGAGUCGGAGGGUUUCAu	:|:||||||||:||||||||||||	atTCGCCCGCCTCGGCCTCCCAAAGTg	>hsa_piR_022437|gb|DQ600690|Homo	NM_001288997.1	213	-57.88	2	26	2883	2909	24	0.875	1	||||||||||	|||||||:||
3223	uaGGUGGGCGGAGUCGGAGGGUUUCAu	|||||| |||| ||||||||||||	atCCACCCTCCTCTGCCTCCCAAAGTg	>hsa_piR_022437|gb|DQ600690|Homo	NM_001289003.1	209	-51.26	2	26	4839	4865	24	0.9167	0.9167	||||||||||	|| |||| ||
3224	uaGGUGGGCGGAGUCGGAGGGUUUCAu	||:||| |||||||||||||||||	atCCGCCCACCTCAGCCTCCCAAAGTg	>hsa_piR_022437|gb|DQ600690|Homo	NM_001289010.1	213	-55.52	2	26	3704	3730	24	0.9167	0.9583	||||||||||	|| |||||||
3225	uagGUGGGCGGAGUCGGAGGGUUUCAu	| |||||||::||||||||||||	atgCTCCCGCCTTGGCCTCCCAAAGTg	>hsa_piR_022437|gb|DQ600690|Homo	NM_001289020.3	204	-47.82	2	25	4665	4691	23	0.8696	0.9565	||||||||||	||||||::||
3226	uagGUGGGCGGAGUCGGAGGGUUUCAu	| |||||||::||||||||||||	atgCTCCCGCCTTGGCCTCCCAAAGTg	>hsa_piR_022437|gb|DQ600690|Homo	NM_001289021.3	204	-47.82	2	25	4548	4574	23	0.8696	0.9565	||||||||||	||||||::||
3227	uaGGUGGGCGGAGUCGGAGGGUUUCAu	|::||| |||||||||||||||||	atCTGCCCACCTCAGCCTCCCAAAGTc	>hsa_piR_022437|gb|DQ600690|Homo	NM_001289023.3	209	-48.64	2	26	3268	3294	24	0.875	0.9583	||||||||||	|| |||||||
3228	uagGUGGGCGGAGUCGGAGGGUUUCAu	| |||||||::||||||||||||	atgCTCCCGCCTTGGCCTCCCAAAGTg	>hsa_piR_022437|gb|DQ600690|Homo	NM_001289024.3	204	-47.82	2	25	3202	3228	23	0.8696	0.9565	||||||||||	||||||::||
3229	uaGGUGGGCGGAGUCGGAGGGUUUCAu	|::||| |||||||||||||||||	atCTGCCCACCTCAGCCTCCCAAAGTc	>hsa_piR_022437|gb|DQ600690|Homo	NM_001289025.3	209	-48.64	2	26	3319	3345	24	0.875	0.9583	||||||||||	|| |||||||
3230	uaGGUGGGCGGAGUCGGAGGGUUUCAu	||||:||||||:||||||||||||	atCCACTCGCCTCGGCCTCCCAAAGTg	>hsa_piR_022437|gb|DQ600690|Homo	NM_001289076.2	217	-58.11	2	26	4669	4695	24	0.9167	1	||||||||||	:||||||:||
3231	uaGGUGGGCGGAGUCGGAGGGUUUCAu	||||:||||||:||||||||||||	atCCACTCGCCTCGGCCTCCCAAAGTg	>hsa_piR_022437|gb|DQ600690|Homo	NM_001289077.2	217	-58.11	2	26	4941	4967	24	0.9167	1	||||||||||	:||||||:||
3232	uaGGUGGGCGGAGUCGGAGGGUUUCAu	||||:||||||:||||||||||||	atCCACTCGCCTCGGCCTCCCAAAGTg	>hsa_piR_022437|gb|DQ600690|Homo	NM_001289078.2	217	-58.11	2	26	4702	4728	24	0.9167	1	||||||||||	:||||||:||
3233	uaGGUGGGCGGAGUCGGAGGGUUUCAu	||||:||||||:||||||||||||	atCCACTCGCCTCGGCCTCCCAAAGTg	>hsa_piR_022437|gb|DQ600690|Homo	NM_001289079.2	217	-58.11	2	26	5263	5289	24	0.9167	1	||||||||||	:||||||:||
3234	uaGGUGGGCGGAGUCGGAGGGUUUCAu	||:||| |||||||||||||||||	atCCGCCCACCTCAGCCTCCCAAAGTg	>hsa_piR_022437|gb|DQ600690|Homo	NM_001289155.2	213	-55.52	2	26	2143	2169	24	0.9167	0.9583	||||||||||	|| |||||||
3235	uaGGUGGGCGGAGUCGGAGGGUUUCAu	||:||| |||||||||||||||||	atCCGCCCACCTCAGCCTCCCAAAGTg	>hsa_piR_022437|gb|DQ600690|Homo	NM_001289156.2	213	-55.52	2	26	2224	2250	24	0.9167	0.9583	||||||||||	|| |||||||
3236	uaGGUGGGCGGAGUCGGAGGGUUUCAu	||:||| |||||||||||||||||	atCCGCCCACCTCAGCCTCCCAAAGTg	>hsa_piR_022437|gb|DQ600690|Homo	NM_001289157.2	213	-55.52	2	26	2169	2195	24	0.9167	0.9583	||||||||||	|| |||||||
3237	uaGGUGGGCGGAGUCGGAGGGUUUCAu	||:|||||||||||||||||||||	atCCGCCCGCCTCAGCCTCCCAAAGTg	>hsa_piR_022437|gb|DQ600690|Homo	NM_001289789.1	221	-61.36	2	26	3388	3414	24	0.9583	1	||||||||||	||||||||||
3238	uaGGUGGGCGGAGUCGGAGGGUUUCAu	||:||:||:|::||||||||||||	atCCGCCTGCTTTGGCCTCCCAAAGTg	>hsa_piR_022437|gb|DQ600690|Homo	NM_001289789.1	205	-50.69	2	26	3976	4002	24	0.7917	1	||||||||||	|:||:|::||
3239	uaGGUGGGCGGAGUCGGAGGGUUUCAu	||:|||||||||||||||||||||	atCCGCCCGCCTCAGCCTCCCAAAGTg	>hsa_piR_022437|gb|DQ600690|Homo	NM_001289790.3	221	-61.36	2	26	3088	3114	24	0.9583	1	||||||||||	||||||||||
3240	uaGGUGGGCGGAGUCGGAGGGUUUCAu	||:||:||:|::||||||||||||	atCCGCCTGCTTTGGCCTCCCAAAGTg	>hsa_piR_022437|gb|DQ600690|Homo	NM_001289790.3	205	-50.69	2	26	3676	3702	24	0.7917	1	||||||||||	|:||:|::||
3241	uaGGUGGGCGGAGUCGGAGGGUUUCAu	|::||||||||| |||||||||||	atCTGCCCGCCTCATCCTCCCAAAGTg	>hsa_piR_022437|gb|DQ600690|Homo	NM_001289905.1	209	-50.4	2	26	6248	6274	24	0.875	0.9583	||||||||||	|||||||| |
3242	uaGGUGGGCGGAGUCGGAGGGUUUCAu	||:||||||||:||||||||||||	atCCGCCCGCCTCGGCCTCCCAAAGTg	>hsa_piR_022437|gb|DQ600690|Homo	NM_001289930.1	217	-60.71	2	26	3560	3586	24	0.9167	1	||||||||||	|||||||:||
3243	uaGGUGGGCGGAGUCGGAGGGUUUCAu	||:||||||||:||||||||||||	atCCGCCCGCCTCGGCCTCCCAAAGTg	>hsa_piR_022437|gb|DQ600690|Homo	NM_001289931.1	217	-60.71	2	26	2862	2888	24	0.9167	1	||||||||||	|||||||:||
3244	uaGGUGGGCGGAGUCGGAGGGUUUCAu	|::||| :|||:||||||||||||	atCTGCCCATCTCGGCCTCCCAAAGTg	>hsa_piR_022437|gb|DQ600690|Homo	NM_001289973.2	201	-48.17	2	26	3539	3565	24	0.7917	0.9583	||||||||||	|| :|||:||
3245	uaGGUGGGCGGAGUCGGAGGGUUUCAu	|::|||||||::||||||||||||	gcCTGCCCGCCTTGGCCTCCCAAAGTg	>hsa_piR_022437|gb|DQ600690|Homo	NM_001290048.2	209	-51.58	2	26	2628	2654	24	0.8333	1	||||||||||	||||||::||
3246	uaGGUGGGCGGAGUCGGAGGGUUUCAu	||||:| || ||||||||||||||	atCCACTCCCCCCAGCCTCCCAAAGTg	>hsa_piR_022437|gb|DQ600690|Homo	NM_001290048.2	205	-46.86	2	26	5080	5106	24	0.875	0.9167	||||||||||	:| || ||||
3247	uaGGUGGGCGGAGUCGGAGGGUUUCAu	|||||| |||||||||||||||||	atCCACCCACCTCAGCCTCCCAAAGTg	>hsa_piR_022437|gb|DQ600690|Homo	NM_001290050.1	217	-55.99	2	26	178	204	24	0.9583	0.9583	||||||||||	|| |||||||
3248	uaGGUGGGCGGAGUCGGAGGGUUUCAu	|||||| |||::||||||||||||	atCCACCCACCTTGGCCTCCCAAAGTg	>hsa_piR_022437|gb|DQ600690|Homo	NM_001290117.2	209	-51.06	2	26	1684	1710	24	0.875	0.9583	||||||||||	|| |||::||
3249	uaGGUGGGCGGAGUCGGAGGGUUUCAu	|||||| |||::||||||||||||	atCCACCCACCTTGGCCTCCCAAAGTg	>hsa_piR_022437|gb|DQ600690|Homo	NM_001290118.1	209	-51.06	2	26	1560	1586	24	0.875	0.9583	||||||||||	|| |||::||
3250	uaGGUGGGCGGAGUCGGAGGGUUUCAu	|||||| ||||:||||||||||||	atCCACCCTCCTCGGCCTCCCAAAGTg	>hsa_piR_022437|gb|DQ600690|Homo	NM_001290254.2	213	-54.95	2	26	3076	3102	24	0.9167	0.9583	||||||||||	|| ||||:||
3251	uaGGUGGGCGGAGUCGGAGGGUUUCAu	|||||| ||||:||||||||||||	atCCACCCTCCTCGGCCTCCCAAAGTg	>hsa_piR_022437|gb|DQ600690|Homo	NM_001290255.2	213	-54.95	2	26	3049	3075	24	0.9167	0.9583	||||||||||	|| ||||:||
3252	uaGGUGGGCGGAGUCGGAGGGUUUCAu	||:||| ||||:||||||||||||	atCCGCCCACCTCGGCCTCCCAAAGTg	>hsa_piR_022437|gb|DQ600690|Homo	NM_001290259.2	209	-54.87	2	26	17025	17051	24	0.875	0.9583	||||||||||	|| ||||:||
3253	uaGGUGGGCGGAGUCGGAGGGUUUCAu	:||||| |||||||||||||||||	atTCACCCACCTCAGCCTCCCAAAGTg	>hsa_piR_022437|gb|DQ600690|Homo	NM_001290354.2	213	-53.16	2	26	2113	2139	24	0.9167	0.9583	||||||||||	|| |||||||
3254	uaGGUGGGCGGAGUCGGAGGGUUUCAu	:||||| |||||||||||||||||	atTCACCCACCTCAGCCTCCCAAAGTg	>hsa_piR_022437|gb|DQ600690|Homo	NM_001290357.2	213	-53.16	2	26	2047	2073	24	0.9167	0.9583	||||||||||	|| |||||||
3255	uaGGUGGGCGGAGUCGGAGGGUUUCAu	|::||:|||||:||||||||||||	atCTGCCTGCCTCGGCCTCCCAAAGTg	>hsa_piR_022437|gb|DQ600690|Homo	NM_001291316.2	209	-53.22	2	26	1048	1074	24	0.8333	1	||||||||||	|:|||||:||
3256	uaGGUGGGCGGAGUCGGAGGGUUUCAu	|::||:|||||:||||||||||||	atCTGCCTGCCTCGGCCTCCCAAAGTg	>hsa_piR_022437|gb|DQ600690|Homo	NM_001291317.2	209	-53.22	2	26	1063	1089	24	0.8333	1	||||||||||	|:|||||:||
3257	uaGGUGGGCGGAGUCGGAGGGUUUCAu	|||:|| |||||||||||||||||	atCCATCCACCTCAGCCTCCCAAAGTt	>hsa_piR_022437|gb|DQ600690|Homo	NM_001291324.3	213	-52.23	2	26	3603	3629	24	0.9167	0.9583	||||||||||	|| |||||||
3258	uaGGUGGGCGGAGUCGGAGGGUUUCAu	||||||||||::||||||||||||	atCCACCCGCCTTGGCCTCCCAAAGTg	>hsa_piR_022437|gb|DQ600690|Homo	NM_001291424.1	217	-56.9	2	26	3022	3048	24	0.9167	1	||||||||||	||||||::||
3259	uaGGUGGGCGGAGUCGGAGGGUUUCAu	:||||| |||::| ||||||||||	atTCACCCACCTTGGGCTCCCAAAGTg	>hsa_piR_022437|gb|DQ600690|Homo	NM_001291476.2	197	-43.49	2	26	365	391	24	0.7917	0.9167	||||||||||	|| |||::|
3260	uaGGUGGGCGGAGUCGGAGGGUUUCAu	|::|||||||||||||||||||||	atCTGCCCGCCTCAGCCTCCCAAAGTg	>hsa_piR_022437|gb|DQ600690|Homo	NM_001291496.2	217	-56.67	2	26	4322	4348	24	0.9167	1	||||||||||	||||||||||
3261	uaGGUGGGCGGAGUCGGAGGGUUUCAu	||:||| ||||:||||||||||||	atCCGCCCCCCTCGGCCTCCCAAAGTg	>hsa_piR_022437|gb|DQ600690|Homo	NM_001291496.2	209	-54	2	26	3745	3771	24	0.875	0.9583	||||||||||	|| ||||:||
3262	uaGGUGGGCGGAGUCGGAGGGUUUCAu	||:||||||||:||||||||||||	atCCGCCCGCCTCGGCCTCCCAAAGTg	>hsa_piR_022437|gb|DQ600690|Homo	NM_001291604.2	217	-60.71	2	26	2936	2962	24	0.9167	1	||||||||||	|||||||:||
3263	uaGGUGGGCGGAGUCGGAGGGUUUCAu	||:||||||||:||||||||||||	atCCGCCCGCCTCGGCCTCCCAAAGTg	>hsa_piR_022437|gb|DQ600690|Homo	NM_001291605.2	217	-60.71	2	26	3161	3187	24	0.9167	1	||||||||||	|||||||:||
3264	uaGGUGGGCGGAGUCGGAGGGUUUCAu	|||||||||||:||||||||||||	atCCACCCGCCTCGGCCTCCCAAAGTg	>hsa_piR_022437|gb|DQ600690|Homo	NM_001291737.1	221	-61.18	2	26	1681	1707	24	0.9583	1	||||||||||	|||||||:||
3265	uaGGUGGGCGGAGUCGGAGGGUUUCAu	|||||||||||:||||||||||||	atCCACCCGCCTCGGCCTCCCAAAGTg	>hsa_piR_022437|gb|DQ600690|Homo	NM_001291738.1	221	-61.18	2	26	1536	1562	24	0.9583	1	||||||||||	|||||||:||
3266	uaGGUGGGCGGAGUCGGAGGGUUUCAu	|||||||||||:||||||||||||	atCCACCCGCCTCGGCCTCCCAAAGTg	>hsa_piR_022437|gb|DQ600690|Homo	NM_001291739.1	221	-61.18	2	26	1615	1641	24	0.9583	1	||||||||||	|||||||:||
3267	uaGGU-GGGCGGAGUCGGAGGGUUUCAu	:|| ||:||||||||||||||||||	gaTCATCCTGCCTCAGCCTCCCAAAGTg	>hsa_piR_022437|gb|DQ600690|Homo	NM_001291743.2	208	-51.95	2	26	2781	2808	25	0.88	0.96	||||||||||	|:||||||||
3268	uaGGU-GGGCGGAGUCGGAGGGUUUCAu	:|| ||:||||||||||||||||||	gaTCATCCTGCCTCAGCCTCCCAAAGTg	>hsa_piR_022437|gb|DQ600690|Homo	NM_001291744.2	208	-51.95	2	26	2800	2827	25	0.88	0.96	||||||||||	|:||||||||
3269	uaGGUGGGCGGAGUCGGAGGGUUUCAu	|::||:|||||:||||||||||||	atCTGCCTGCCTCGGCCTCCCAAAGTg	>hsa_piR_022437|gb|DQ600690|Homo	NM_001291879.2	209	-53.22	2	26	670	696	24	0.8333	1	||||||||||	|:|||||:||
3270	uagGUGGGCGGAGUCGGAGGGUUUCAu	| ||| |||||||||||||||||	ccgCCCCCCCCTCAGCCTCCCAAAGTg	>hsa_piR_022437|gb|DQ600690|Homo	NM_001291896.1	204	-49.68	2	25	3699	3725	23	0.913	0.913	||||||||||	|| |||||||
3271	uaGGUGGGCGGAGUCGGAGGGUUUCAu	:|:||||||||:||||||||||||	atTCGCCCGCCTCGGCCTCCCAAAGTg	>hsa_piR_022437|gb|DQ600690|Homo	NM_001291916.2	213	-57.88	2	26	4304	4330	24	0.875	1	||||||||||	|||||||:||
3272	uaggugggcGGAGUCGGAGGGUUUCAu	::|||| ||||||||||	gcaatttatTTTCAGACTCCCAAAGTa	>hsa_piR_022437|gb|DQ600690|Homo	NM_001291951.2	174	-28.79	2	19	2568	2594	17	0.8235	0.9412	||||||||||	::||||
3273	uaggugggcGGAGUCGGAGGGUUUCAu	::|||| ||||||||||	gcaatttatTTTCAGACTCCCAAAGTa	>hsa_piR_022437|gb|DQ600690|Homo	NM_001291952.2	174	-28.79	2	19	2654	2680	17	0.8235	0.9412	||||||||||	::||||
3274	uaggugggcGGAGUCGGAGGGUUUCAu	::|||| ||||||||||	gcaatttatTTTCAGACTCCCAAAGTa	>hsa_piR_022437|gb|DQ600690|Homo	NM_001291953.2	174	-28.79	2	19	2817	2843	17	0.8235	0.9412	||||||||||	::||||
3275	uaggugggcGGAGUCGGAGGGUUUCAu	::|||| ||||||||||	gcaatttatTTTCAGACTCCCAAAGTa	>hsa_piR_022437|gb|DQ600690|Homo	NM_001291954.2	174	-28.79	2	19	2403	2429	17	0.8235	0.9412	||||||||||	::||||
3276	uaggugggcGGAGUCGGAGGGUUUCAu	::|||| ||||||||||	gcaatttatTTTCAGACTCCCAAAGTa	>hsa_piR_022437|gb|DQ600690|Homo	NM_001291955.2	174	-28.79	2	19	2428	2454	17	0.8235	0.9412	||||||||||	::||||
3277	uaGGUGGGCGGAGUCGGAGGGUUUCAu	|||:|||||||:||||||||||||	atCCATCCGCCTCGGCCTCCCAAAGTg	>hsa_piR_022437|gb|DQ600690|Homo	NM_001291969.2	217	-58.83	2	26	5877	5903	24	0.9167	1	||||||||||	|||||||:||
3278	uaGGUGGGCGGAGUCGGAGGGUUUCAu	||||||||| ::||||||||||||	atCCACCCGCCCTGGCCTCCCAAAGTg	>hsa_piR_022437|gb|DQ600690|Homo	NM_001291969.2	209	-54.41	2	26	6356	6382	24	0.875	0.9583	||||||||||	||||| ::||
3279	uaGGUGGGCGGAGUCGGAGGGUUUCAu	||:||:|||||: |||||||||||	atCCGCCTGCCTCGACCTCCCAAAGTt	>hsa_piR_022437|gb|DQ600690|Homo	NM_001291969.2	205	-51.2	2	26	3396	3422	24	0.8333	0.9583	||||||||||	|:|||||: |
3280	uaGGUGGGCGGAGUCGGAGGGUUUCAu	|||:|||||||:||||||||||||	atCCATCCGCCTCGGCCTCCCAAAGTg	>hsa_piR_022437|gb|DQ600690|Homo	NM_001291970.2	217	-58.83	2	26	6165	6191	24	0.9167	1	||||||||||	|||||||:||
3281	uaGGUGGGCGGAGUCGGAGGGUUUCAu	||||||||| ::||||||||||||	atCCACCCGCCCTGGCCTCCCAAAGTg	>hsa_piR_022437|gb|DQ600690|Homo	NM_001291970.2	209	-54.41	2	26	6644	6670	24	0.875	0.9583	||||||||||	||||| ::||
3282	uaGGUGGGCGGAGUCGGAGGGUUUCAu	||:||:|||||: |||||||||||	atCCGCCTGCCTCGACCTCCCAAAGTt	>hsa_piR_022437|gb|DQ600690|Homo	NM_001291970.2	205	-51.2	2	26	3684	3710	24	0.8333	0.9583	||||||||||	|:|||||: |
3283	uagGUGGGCGGAGUCGGAGGGUUUCAu	|:||:||||::||||||||||||	ataCGCCTGCCTTGGCCTCCCAAAGTg	>hsa_piR_022437|gb|DQ600690|Homo	NM_001292008.2	204	-48.85	2	25	3910	3936	23	0.8261	1	||||||||||	|:||||::||
3284	uaGGUGGGCGGAGUCGGAGGGUUUCAu	|::||:||| |:||||||||||||	atCTGCCTGCCCCGGCCTCCCAAAGTg	>hsa_piR_022437|gb|DQ600690|Homo	NM_001292038.2	201	-48.03	2	26	4289	4315	24	0.7917	0.9583	||||||||||	|:||| |:||
3285	uaGGUGGGCGGAGUCGGAGGGUUUCAu	|| ||| |||||||||||||||||	atCCTCCCACCTCAGCCTCCCAAAGTg	>hsa_piR_022437|gb|DQ600690|Homo	NM_001293735.2	209	-51.6	2	26	2782	2808	24	0.9167	0.9167	||||||||||	|| |||||||
3286	uaGGUGGGCGGAGUCGGAGGGUUUCAu	:|| ||||:| :||||||||||||	atTCA-CCGCTTGGGCCTCCCAAAGTg	>hsa_piR_022437|gb|DQ600690|Homo	NM_001294314.1	191	-43.57	2	26	571	596	24	0.7917	0.9167	||||||||||	||||:| :||
3287	uaGGUGGGCGGAGUCGGAGGGUUUCAu	||||||||||::||||||||||||	atCCACCCGCCTTGGCCTCCCAAAGTg	>hsa_piR_022437|gb|DQ600690|Homo	NM_001296.5	217	-56.9	2	26	2118	2144	24	0.9167	1	||||||||||	||||||::||
3288	uaGGUGGGCGGAGUCGGAGGGUUUCAu	:::||:||||||||||||||||||	atTTGCCTGCCTCAGCCTCCCAAAGTg	>hsa_piR_022437|gb|DQ600690|Homo	NM_001296.5	209	-51.34	2	26	2816	2842	24	0.8333	1	||||||||||	|:||||||||
3289	uaGGUGGGCGGAGUCGGAGGGUUUCAu	|::||| ||||:||||||||||||	atCTGCCCACCTCGGCCTCCCAAAGTa	>hsa_piR_022437|gb|DQ600690|Homo	NM_001297419.1	205	-50.28	2	26	3098	3124	24	0.8333	0.9583	||||||||||	|| ||||:||
3290	uaGGUGGGCGGAGUCGGAGGGUUUCAu	|::||| ||||:||||||||||||	atCTGCCCACCTCGGCCTCCCAAAGTa	>hsa_piR_022437|gb|DQ600690|Homo	NM_001297421.1	205	-50.28	2	26	2782	2808	24	0.8333	0.9583	||||||||||	|| ||||:||
3291	uaGGUGGGCGGAGUCGGAGGGUUUCAu	|||||:||||::||||||||||||	atCCACCTGCCTTGGCCTCCCAAAGTg	>hsa_piR_022437|gb|DQ600690|Homo	NM_001297434.2	213	-54.1	2	26	3088	3114	24	0.875	1	||||||||||	|:||||::||
3292	uaGGUGGGCGGAGUCGGAGGGUUUCAu	|::||:|||||:||||||||||||	atCTGCCTGCCTCGGCCTCCCAAAGTg	>hsa_piR_022437|gb|DQ600690|Homo	NM_001297563.2	209	-53.22	2	26	303	329	24	0.8333	1	||||||||||	|:|||||:||
3293	uaGGUGGGCGGAGUCGGAGGGUUUCAu	||:|||||:|||||||||||||||	atCCGCCCGCTTCAGCCTCCCAAAGTg	>hsa_piR_022437|gb|DQ600690|Homo	NM_001297568.1	217	-58.42	2	26	2122	2148	24	0.9167	1	||||||||||	||||:|||||
3294	uaGGUGGGCGGAGUCGGAGGGUUUCAu	||:|||||:|||||||||||||||	atCCGCCCGCTTCAGCCTCCCAAAGTg	>hsa_piR_022437|gb|DQ600690|Homo	NM_001297569.1	217	-58.42	2	26	1926	1952	24	0.9167	1	||||||||||	||||:|||||
3295	uaGGUGGGCGGAGUCGGAGGGUUUCAu	|||||:||||:: |||||||||||	atCCACCTGCCTTGACCTCCCAAAGTg	>hsa_piR_022437|gb|DQ600690|Homo	NM_001297590.2	205	-50.08	2	26	2513	2539	24	0.8333	0.9583	||||||||||	|:||||:: |
3296	uaGGUGGGCGGAGUCGGAGGGUUUCAu	||||||||||::||||||||||||	atCCACCCGCCTTGGCCTCCCAAAGTg	>hsa_piR_022437|gb|DQ600690|Homo	NM_001297616.1	217	-56.9	2	26	135	161	24	0.9167	1	||||||||||	||||||::||
3297	uaGGUGGGCGGAGUCGGAGGGUUUCAu	|| ||| ||||:||||||||||||	atCCTCCCACCTCGGCCTCCCAAAGTt	>hsa_piR_022437|gb|DQ600690|Homo	NM_001297617.2	205	-49.54	2	26	3281	3307	24	0.875	0.9167	||||||||||	|| ||||:||
3298	uaGGUGGGCGGAGUCGGAGGGUUUCAu	|| ||| ||||:||||||||||||	atCCTCCCACCTCGGCCTCCCAAAGTt	>hsa_piR_022437|gb|DQ600690|Homo	NM_001297618.2	205	-49.54	2	26	2888	2914	24	0.875	0.9167	||||||||||	|| ||||:||
3299	uaGGUGGGCGGAGUCGGAGGGUUUCAu	|| ||:||||||||||||||||||	atCCTCCTGCCTCAGCCTCCCAAAGTt	>hsa_piR_022437|gb|DQ600690|Homo	NM_001297716.2	213	-53.23	2	26	2286	2312	24	0.9167	0.9583	||||||||||	|:||||||||
3300	uaGGUGGGCGGAGUCGGAGGGUUUCAu	|::||| |||::||||||||||||	atCTGCCCACCTTGGCCTCCCAAAGTg	>hsa_piR_022437|gb|DQ600690|Homo	NM_001297732.2	201	-45.9	2	26	2287	2313	24	0.7917	0.9583	||||||||||	|| |||::||
3301	uaGGUGGGCGGAGUCGGAGGGUUUCAu	|::||| |||::||||||||||||	atCTGCCCACCTTGGCCTCCCAAAGTg	>hsa_piR_022437|gb|DQ600690|Homo	NM_001297733.2	201	-45.9	2	26	2288	2314	24	0.7917	0.9583	||||||||||	|| |||::||
3302	uaGGUGGGCGGAGUCGGAGGGUUUCAu	||:||| |||| ||||||||||||	atCCGCCCACCTCTGCCTCCCAAAGTg	>hsa_piR_022437|gb|DQ600690|Homo	NM_001297736.2	205	-51.18	2	26	5929	5955	24	0.875	0.9167	||||||||||	|| |||| ||
3303	uaGGUGGGCGGAGUCGGAGGGUUUCAu	||||:|||| ::||||||||||||	atCCACTCGCCCTGGCCTCCCAAAGTg	>hsa_piR_022437|gb|DQ600690|Homo	NM_001297736.2	205	-51.34	2	26	9116	9142	24	0.8333	0.9583	||||||||||	:|||| ::||
3304	uaGGUGGGCGGAGUCGGAGGGUUUCAu	||:||| |||| ||||||||||||	atCCGCCCACCTCTGCCTCCCAAAGTg	>hsa_piR_022437|gb|DQ600690|Homo	NM_001297737.2	205	-51.18	2	26	5984	6010	24	0.875	0.9167	||||||||||	|| |||| ||
3305	uaGGUGGGCGGAGUCGGAGGGUUUCAu	||||:|||| ::||||||||||||	atCCACTCGCCCTGGCCTCCCAAAGTg	>hsa_piR_022437|gb|DQ600690|Homo	NM_001297737.2	205	-51.34	2	26	9171	9197	24	0.8333	0.9583	||||||||||	:|||| ::||
3306	uagGUGGGCGGAGUCGGAGGGUUUCAu	||||:||||||||||||||||||	ctgCACCTGCCTCAGCCTCCCAAAGTg	>hsa_piR_022437|gb|DQ600690|Homo	NM_001297752.2	216	-54.24	2	25	4249	4275	23	0.9565	1	||||||||||	|:||||||||
3307	uaGGUGGGCGGAGUCGGAGGGUUUCAu	|::|||||||||||||||||||||	atCTGCCCGCCTCAGCCTCCCAAAGTg	>hsa_piR_022437|gb|DQ600690|Homo	NM_001297763.2	217	-56.67	2	26	5093	5119	24	0.9167	1	||||||||||	||||||||||
3308	uaGGUGGGCGGAGUCGGAGGGUUUCAu	|||||:||| ::||||||||||||	atCCACCTGCCCTGGCCTCCCAAAGTg	>hsa_piR_022437|gb|DQ600690|Homo	NM_001297771.3	205	-51.61	2	26	911	937	24	0.8333	0.9583	||||||||||	|:||| ::||
3309	uaGGUGGGCGGAGUCGGAGGGUUUCAu	||:||| ||||:||||||||||||	atCCGCCCACCTCGGCCTCCCAAAGTg	>hsa_piR_022437|gb|DQ600690|Homo	NM_001297779.2	209	-54.87	2	26	755	781	24	0.875	0.9583	||||||||||	|| ||||:||
3310	uaGGUGGGCGGAGUCGGAGGGUUUCAu	|| ||:||||::||||||||||||	gtCCTCCTGCCTTGGCCTCCCAAAGTg	>hsa_piR_022437|gb|DQ600690|Homo	NM_001297779.2	205	-49.4	2	26	891	917	24	0.8333	0.9583	||||||||||	|:||||::||
3311	uaGGUGGGCGGAGUCGGAGGGUUUCAu	|::||| |||::||||||||||||	atCTGCCCACCTTGGCCTCCCAAAGTg	>hsa_piR_022437|gb|DQ600690|Homo	NM_001300729.1	201	-45.9	2	26	2226	2252	24	0.7917	0.9583	||||||||||	|| |||::||
3312	uaGGUGGGCGGAGUCGGAGGGUUUCAu	|::|||| ||::||||||||||||	atCTGCCCGACTTGGCCTCCCAAAGTa	>hsa_piR_022437|gb|DQ600690|Homo	NM_001300742.3	201	-45.35	2	26	5105	5131	24	0.7917	0.9583	||||||||||	||| ||::||
3313	uaGGUGGGCGGAGUCGGAGGGUUUCAu	|| ||| |||||||||||||||||	atCCTCCCACCTCAGCCTCCCAAAGTg	>hsa_piR_022437|gb|DQ600690|Homo	NM_001300746.1	209	-51.6	2	26	1448	1474	24	0.9167	0.9167	||||||||||	|| |||||||
3314	uaGGUGGGCGGAGUCGGAGGGUUUCAu	|| ||| |||||||||||||||||	atCCTCCCACCTCAGCCTCCCAAAGTg	>hsa_piR_022437|gb|DQ600690|Homo	NM_001300747.2	209	-51.6	2	26	1353	1379	24	0.9167	0.9167	||||||||||	|| |||||||
3315	uaGGUGGGCGGAGUCGGAGGGUUUCAu	|| ||| |||||||||||||||||	atCCTCCCACCTCAGCCTCCCAAAGTg	>hsa_piR_022437|gb|DQ600690|Homo	NM_001300748.2	209	-51.6	2	26	1350	1376	24	0.9167	0.9167	||||||||||	|| |||||||
3316	uaGGUGGGCGGAGUCGGAGGGUUUCAu	|||||||||||:| ||||||||||	atCCACCCGCCTCGGGCTCCCAAAGTg	>hsa_piR_022437|gb|DQ600690|Homo	NM_001300753.1	213	-56.44	2	26	3720	3746	24	0.9167	0.9583	||||||||||	|||||||:|
3317	uaGGUGGGCGGAGUCGGAGGGUUUCAu	|||||||||||:| ||||||||||	atCCACCCGCCTCGGGCTCCCAAAGTg	>hsa_piR_022437|gb|DQ600690|Homo	NM_001300755.1	213	-56.44	2	26	3818	3844	24	0.9167	0.9583	||||||||||	|||||||:|
3318	uaGGUGGGCGGAGUCGGAGGGUUUCAu	|||||||||||:| ||||||||||	atCCACCCGCCTCGGGCTCCCAAAGTg	>hsa_piR_022437|gb|DQ600690|Homo	NM_001300757.1	213	-56.44	2	26	3473	3499	24	0.9167	0.9583	||||||||||	|||||||:|
[truncated: 13,357 more rows]

## Sheet: Sheet2
Name of dataset: miRNA and piRNA gene-targets
No. of identified items: 3166 of 3812
No. of unidentified items: 646
ID type: GeneSymbol
Number of mapped gene: 3166
Is dataset quantitative :NO
Mapped items:
Dataset item (Gene symbol )		Entrez ID	Gene symbol	Description	Alternate names	Chromosome	Map location
A1BG		1	A1BG	alpha-1-B glycoprotein	A1B|ABG|GAB|HYST2477	19	19q13.4
A2ML1		144568	A2ML1	alpha-2-macroglobulin-like 1	CPAMD9	12	12p13.31
AADACL4		343066	AADACL4	arylacetamide deacetylase-like 4	-	1	1p36.21
AANAT		15	AANAT	aralkylamine N-acetyltransferase	DSPS|SNAT	17	17q25.1
AASDH		132949	AASDH	aminoadipate-semialdehyde dehydrogenase	ACSF4|LYS2|NRPS1098|NRPS998	4	4q12
ABCA1		19	ABCA1	ATP-binding cassette, sub-family A (ABC1), member 1	ABC-1|ABC1|CERP|HDLDT1|TGD	9	9q31.1
ABCA13		154664	ABCA13	ATP-binding cassette, sub-family A (ABC1), member 13	-	7	7p12.3
ABCA5		23461	ABCA5	ATP-binding cassette, sub-family A (ABC1), member 5	ABC13|EST90625	17	17q24.3
ABCB4		5244	ABCB4	ATP-binding cassette, sub-family B (MDR/TAP), member 4	ABC21|GBD1|ICP3|MDR2|MDR2/3|MDR3|PFIC-3|PGY3	7	7q21.1
ABCB5		340273	ABCB5	ATP-binding cassette, sub-family B (MDR/TAP), member 5	ABCB5alpha|ABCB5beta|EST422562	7	7p21.1
ABCB7		22	ABCB7	ATP-binding cassette, sub-family B (MDR/TAP), member 7	ABC7|ASAT|Atm1p|EST140535	X	Xq13.3
ABCC11		85320	ABCC11	ATP-binding cassette, sub-family C (CFTR/MRP), member 11	EWWD|MRP8|WW	16	16q12.1
ABCD2		225	ABCD2	ATP-binding cassette, sub-family D (ALD), member 2	ABC39|ALDL1|ALDR|ALDRP|hALDR	12	12q12
ABCG8		64241	ABCG8	ATP-binding cassette, sub-family G (WHITE), member 8	GBD4|STSL	2	2p21
ABHD17B		51104	ABHD17B	abhydrolase domain containing 17B	C9orf77|CGI-67|FAM108B1	9	9q21.13
ABO		28	ABO	ABO blood group (transferase A, alpha 1-3-N-acetylgalactosaminyltransferase; transferase B, alpha 1-3-galactosyltransferase)	A3GALNT|A3GALT1|GTB|NAGAT	9	9q34.2
ACACB		32	ACACB	acetyl-CoA carboxylase beta	ACC2|ACCB|HACC275	12	12q24.11
ACAD10		80724	ACAD10	acyl-CoA dehydrogenase family, member 10	-	12	12q24.12
ACADSB		36	ACADSB	acyl-CoA dehydrogenase, short/branched chain	2-MEBCAD|ACAD7|SBCAD	10	10q26.13
ACBD4		79777	ACBD4	acyl-CoA binding domain containing 4	HMFT0700	17	17q21.31
ACBD5		91452	ACBD5	acyl-CoA binding domain containing 5	-	10	10p12.1
ACER2		340485	ACER2	alkaline ceramidase 2	ALKCDase2|ASAH3L	9	9p22.1
ACER3		55331	ACER3	alkaline ceramidase 3	APHC|PHCA	11	11q13.5
ACKR2		1238	ACKR2	atypical chemokine receptor 2	CCBP2|CCR10|CCR9|CMKBR9|D6|hD6	3	3p21.3
ACOT11		26027	ACOT11	acyl-CoA thioesterase 11	BFIT|STARD14|THEA|THEM1	1	1p32.3
ACOT9		23597	ACOT9	acyl-CoA thioesterase 9	ACATE2|CGI-16|MT-ACT48|MTACT48	X	Xp22.11
ACOX1		51	ACOX1	acyl-CoA oxidase 1, palmitoyl	ACOX|PALMCOX|SCOX	17	17q25.1
ACOXL		55289	ACOXL	acyl-CoA oxidase-like	-	2	2q13
ACP6		51205	ACP6	acid phosphatase 6, lysophosphatidic	ACPL1|LPAP|PACPL1	1	1q21
ACTR10		55860	ACTR10	actin-related protein 10 homolog (S. cerevisiae)	ACTR11|Arp10|Arp11|HARP11	14	14q23.1
ACTR3C		653857	ACTR3C	ARP3 actin-related protein 3 homolog C (yeast)	ARP11	7	7q36.1
ACVR2B		93	ACVR2B	activin A receptor, type IIB	ACTRIIB|ActR-IIB|HTX4	3	3p22
ACVRL1		94	ACVRL1	activin A receptor type II-like 1	ACVRLK1|ALK-1|ALK1|HHT|HHT2|ORW2|SKR3|TSR-I	12	12q13.13
ACYP2		98	ACYP2	acylphosphatase 2, muscle type	ACYM|ACYP	2	2p16.2
ADAM10		102	ADAM10	ADAM metallopeptidase domain 10	AD10|AD18|CD156c|HsT18717|MADM|RAK|kuz	15	15q22
ADAMTS17		170691	ADAMTS17	ADAM metallopeptidase with thrombospondin type 1 motif, 17	-	15	15q24
ADAMTS4		9507	ADAMTS4	ADAM metallopeptidase with thrombospondin type 1 motif, 4	ADAMTS-2|ADAMTS-4|ADMP-1	1	1q21-q23
ADAT1		23536	ADAT1	adenosine deaminase, tRNA-specific 1	HADAT1	16	16q23.1
ADGRF2		222611	ADGRF2	adhesion G protein-coupled receptor F2	GPR111|PGR20|hGPCR35	6	6p12.3
ADI1		55256	ADI1	acireductone dioxygenase 1	APL1|ARD|Fe-ARD|HMFT1638|MTCBP1|Ni-ARD|SIPL|mtnD	2	2p25.3
ADIPOQ		9370	ADIPOQ	adiponectin, C1Q and collagen domain containing	ACDC|ACRP30|ADIPQTL1|ADPN|APM-1|APM1|GBP28	3	3q27
ADIPOR2		79602	ADIPOR2	adiponectin receptor 2	ACDCR2|PAQR2	12	12p13.31
ADPRHL1		113622	ADPRHL1	ADP-ribosylhydrolase like 1	ARH2	13	13q34
[truncated: 3,123 more rows]

## Sheet: Sheet3
Analysis: Cellular component
[truncated: 429 more rows]

[truncated: 9 more sheets: Sheet4, Sheet5, Sheet6, Sheet7, Sheet8, Sheet9, Sheet10, Sheet11, Sheet12]
