# Supplementary material for: Blood Plasma Small Non-Coding RNAs as Diagnostic Molecules of Progesterone Receptor-Negative Phenotype of Serous Ovarian Tumors
Source: Preprints.org preprint supplement (doi:10.20944/preprints202307.1155.v1), 2023-07-18
Supplement: Supplementary file 5 [file TableS5.xlsx]

## Sheet: Sheet1
RNA	miRNA Accession Number (miRBase), available online: http://www.mirbase.org/ (accessed on 15 January 2023); piRNAbank (http://pirnabank.ibab.ac.in/cgi-bin/accession.cgi, last accessed on 15 January 2023) for piRNAs; GenBank Accession Number for mRNA (https://www.ncbi.nlm.nih.gov/nucleotide, last accessed on 15 January 2023)	Nucleotide Sequence of Sense Primer for PCR, 5’-3’	PCR Primer Annealing Temperature, °C
hsa-miR-16-5p	MIMAT0000069	TAGCAGCACGTAAATATTGGCG	62
hsa-miR-17-5p	MIMAT0000070	CAAAGTGCTTACAGTGCAGGTAG	55
hsa-miR-20a-5p	MIMAT0000075	TAAAGTGCTTATAGTGCAGGTAG	52
hsa-miR-93-5p	MIMAT0000093	CAAAGTGCTGTTCGTGCAGGTAG	55
hsa-miR-30d-5p	MIMAT0000245	TGTAAACATCCCCGACTGGAAG	55
hsa_piR_019914	DQ597347	GCCCGGCTAGCTCAGTCGGTAGAGCATGAGAC	55
hsa_piR_022437	DQ600690	TACTTTGGGAGGCTGAGGCGGGTGGAT	48.9
hsa_piR_004801	DQ576605	TCCTTAGGTCGCTGGTTCGATTCCGGCTCGAA	57.6
hsa_piR_009295	DQ582567	CATTGGTGGTTCAGTGGTAGAATTCTCGC	57.6
hsa_piR_018569	DQ595533	TTGGTGGTTCAGTGGTAGAATTCTCGCCT	49
hsa_piR_018570	DQ595536	TTGGTGGTTCAGTGGTAGAATTCTCGCCTGCC	55
hsa_piR_016945	DQ593356	CGGCTAGCTCAGTCGGTAGAGCATGAGACT	46.2
hsa_piR_004307	DQ575881	TCCGTAGTGTAGTGGTTATCACGTTCGCCT	55
hsa_piR_020829	DQ598677	GTTTCCGTAGTGTAGTGGTCATCACGTTCGCC	55
hsa_piR_004308	DQ575882	TCCGTAGTGTAGTGGTTATCACGTTCGCCTCA	55
hsa_piR_019420	DQ596670	GAGGAATGATGACAAGAAAAGGCCGAA	55
hsa_piR_020813	DQ598646	GTTCACTGATGAGAGCATTGTTCTGAGCCA	55
hsa_piR_010024	DQ583491	TGCACTCCAGCCTGGGTGACAGAGTGTC	55
hsa_piR_002158	DQ572892	TCACAATGCTGACACTCAAACTGCTGACA	55
hsa_piR_017723	DQ594464	TTCCGTAGTGTAGTGGTTATCACGTTCGCC	55
hsa_piR_017295	DQ593909	CTTAGGTCGCTGGTTCGATTCCGGCT	55
hsa_piR_017724	DQ594465	TTCCGTAGTGTAGTGGTTATCACGTTCGCCTC	55
hsa_piR_000794	DQ570992	AGCCCGGCTAGCTCAGTCGGTAGAGCATGAGA	55
hsa_piR_003832	DQ575213	TCCCAGCTACCTAGGAGGCTGAGGCAGGAG	57.6
ACTB_F79	NM_001101.5	AGCACAGAGCCTCGCCTTT	61.6
ACTB_R79	NM_001101.5	CGCGGCGATATCATCATCCAT	61.6
TUBA1B_F107	NM_006082.3	GGCTGCCCTTGAGAAGGATT	61.6
TUBA1B_R107	NM_006082.3	CTGCAGGGCCAAAAGGAATG	61.6
GAPDH_F70	NM_001289746.2	ACTAGGCGCTCACTGTTCTC	63.8
GAPDH_R70	NM_001289746.2	TTCACCTTCCCCATGGTGTC	63.8
MMP9_F78	NM_004994.3	GGTGATTGACGACGCCTTTG	63.8
MMP9_R78	NM_004994.3	CTGTACACGCGAGTGAAGGT	63.8
MMP7_F77	NM_002423.5	CGATGAGGATGAACGCTGGA	63.8
MMP7_R77	NM_002423.5	GGCCAAGTTCATGAGTTGCAG	63.8
MUC16_F76	NM_024690.2	TTGGCCTCTGAGAGTGTGAC	63.8
MUC16_R76	NM_024690.2	GGTTATAACTGCTGGTGGTGG	63.8
PGR_F186	NM_000926.4	GTATTTGTGCGTGTGGGTGG	48.9
PGR_R186	NM_000926.4	CTCTCGGTACAGCCCATTCC	48.9
